# Supplementary material for: In silico Design for Systems-Based Metabolic Engineering for the Bioconversion of Valuable Compounds From Industrial By-Products
Source: Front Genet. 2021 Mar 26;12:633073. doi: 10.3389/fgene.2021.633073 (PMC8044919; doi:10.3389/fgene.2021.633073)
Supplement: Supplementary file 1 [file Table_1.XLSX]

## Sheet: ECC2
Abbreviation	Reaction	GPR	Description	SubSystem	Reversible	Lower bound	Upper bound	Objetive	Confidence Score	EC Number	KEGG ID	Notes
2DGLCptspp	pep[c] + 2dglc[p] -> 2doxg6p[c] + pyr[c]	"	2-Deoxy-D-glucose transport via PEP:Pyr PTS (periplasm)	"	0	0	1000	0				Added by Experimental Esentially
3OAR140	h[c] + nadph[c] + 3omrsACP[c] <=> nadp[c] + 3hmrsACP[c]	ECOLC_RS13455	3-oxoacyl-[acyl-carrier-protein] reductase (n-C14:0)	Cell Envelope Biosynthesis	1	-1000	1000	0				Originally Reported
3OAS140	h[c] + ddcaACP[c] + malACP[c] -> 3omrsACP[c] + co2[c] + ACP[c]	ECOLC_RS07145 or ECOLC_RS13445	3-oxoacyl-[acyl-carrier-protein] synthase (n-C14:0)	Cell Envelope Biosynthesis	0	0	1000	0				Originally Reported
4HTHRK	atp[c] + 4hthr[c] -> h[c] + adp[c] + phthr[c]	"	4-Hydroxy-L-threonine kinase	"	0	0	1000	0				Added by Experimental Esentially
5DOAN	dad_5[c] + h2o[c] -> 5drib[c] + ade[c]	ECOLC_RS18805	5-deoxyadenosine nuclosidase	Cofactor and Prosthetic Group Biosynthesis	0	0	1000	0				Originally Reported
A5PISO	ru5p__D[c] <=> ara5p[c]	ECOLC_RS02675 or ECOLC_RS05350	Arabinose-5-phosphate isomerase	Alternate Carbon Metabolism	1	-1000	1000	0				Originally Reported
AACPS3	atp[c] + hdca[c] + ACP[c] -> ppi[c] + amp[c] + palmACP[c]	ECOLC_RS04690 and ECOLC_RS13450	Acyl-[acyl-carrier-protein] synthetase (n-C16:0)	Cell Envelope Biosynthesis	0	0	1000	0				Originally Reported
AACPS4	hdcea[c] + atp[c] + ACP[c] -> hdeACP[c] + ppi[c] + amp[c]	ECOLC_RS04690 and ECOLC_RS13450	Acyl-[acyl-carrier-protein] synthetase (n-C16:1)	Cell Envelope Biosynthesis	0	0	1000	0				Originally Reported
AACPS7	atp[c] + ddca[c] + ACP[c] -> ppi[c] + ddcaACP[c] + amp[c]	ECOLC_RS04690 and ECOLC_RS13450	Acyl-[acyl-carrier-protein] synthetase (n-C12:0)	Cell Envelope Biosynthesis	0	0	1000	0				Originally Reported
ACACT1r	2 accoa[c] <=> aacoa[c] + coa[c]	ECOLC_RS07635 or ECOLC_RS07055 or ECOLC_RS22470	Acetyl-CoA C-acetyltransferase	Membrane Lipid Metabolism	1	-1000	1000	0				Originally Reported
ACACT2r	accoa[c] + btcoa[c] <=> 3ohcoa[c] + coa[c]	ECOLC_RS07055 or ECOLC_RS22470	Acetyl-CoA C-acyltransferase (butanoyl-CoA) (r)	Membrane Lipid Metabolism	1	-1000	1000	0				Originally Reported
ACACT3r	accoa[c] + hxcoa[c] <=> 3oocoa[c] + coa[c]	ECOLC_RS07055 or ECOLC_RS22470	Acetyl-CoA C-acyltransferase (hexanoyl-CoA) (r)	Membrane Lipid Metabolism	1	-1000	1000	0				Originally Reported
ACACT4r	accoa[c] + occoa[c] <=> 3odcoa[c] + coa[c]	ECOLC_RS07055 or ECOLC_RS22470	Acetyl-CoA C-acyltransferase (octanoyl-CoA) (r)	Membrane Lipid Metabolism	1	-1000	1000	0				Originally Reported
ACACT5r	accoa[c] + dcacoa[c] <=> 3oddcoa[c] + coa[c]	ECOLC_RS07055 or ECOLC_RS22470	Acetyl-CoA C-acyltransferase (decanoyl-CoA) (r)	Membrane Lipid Metabolism	1	-1000	1000	0				Originally Reported
ACACT6r	accoa[c] + ddcacoa[c] <=> 3otdcoa[c] + coa[c]	ECOLC_RS07055 or ECOLC_RS22470	Acetyl-CoA C-acyltransferase (dodecanoyl-CoA) (r)	Membrane Lipid Metabolism	1	-1000	1000	0				Originally Reported
ACACT7r	accoa[c] + tdcoa[c] <=> 3ohdcoa[c] + coa[c]	ECOLC_RS07055 or ECOLC_RS22470	Acetyl-CoA C-acyltransferase (tetradecanoyl-CoA) (r)	Membrane Lipid Metabolism	1	-1000	1000	0				Originally Reported
ACALD	nad[c] + coa[c] + acald[c] <=> h[c] + accoa[c] + nadh[c]	ECOLC_RS17590 or ECOLC_RS12785	Acetaldehyde dehydrogenase (acetylating)	Pyruvate Metabolism	1	-1000	1000	0				Originally Reported
ACCOAC	accoa[c] + atp[c] + hco3[c] -> h[c] + adp[c] + pi[c] + malcoa[c]	ECOLC_RS18680 and ECOLC_RS07180 and ECOLC_RS02405 and ECOLC_RS02400	Acetyl-CoA carboxylase	Membrane Lipid Metabolism	0	0	1000	0				Originally Reported
ACGAptspp	pep[c] + acgam[p] -> acgam6p[c] + pyr[c]	(ECOLC_RS06760 and ECOLC_RS13415 and ECOLC_RS06770 and ECOLC_RS06765) or (ECOLC_RS16005 and ECOLC_RS06770 and ECOLC_RS06765)	N-Acetyl-D-glucosamine transport via PEP:Pyr PTS (periplasm)	"	0	0	1000	0				Added by Experimental Esentially
ACGK	atp[c] + acglu[c] -> adp[c] + acg5p[c]	ECOLC_RS21855	Acetylglutamate kinase	Arginine and Proline Metabolism	0	0	1000	0				Originally Reported
ACGS	accoa[c] + glu__L[c] -> h[c] + acglu[c] + coa[c]	ECOLC_RS04790	N-acetylglutamate synthase	Arginine and Proline Metabolism	0	0	1000	0				Experimental Esentially/Originally Reported
ACHBS	h[c] + 2obut[c] + pyr[c] -> 2ahbut[c] + co2[c]	(ECOLC_RS00165 and ECOLC_RS00160) or (ECOLC_RS19220 and ECOLC_RS19215)	2-aceto-2-hydroxybutanoate synthase	Valine, Leucine, and Isoleucine Metabolism	0	0	1000	0				Experimental Esentially/Originally Reported
ACKr	ac[c] + atp[c] <=> actp[c] + adp[c]	ECOLC_RS03095 or ECOLC_RS07280 or ECOLC_RS09570	Acetate kinase	Pyruvate Metabolism	1	-1000	1000	0				Originally Reported
ACLS	h[c] + 2 pyr[c] -> alac__S[c] + co2[c]	(ECOLC_RS00165 and ECOLC_RS00160) or (ECOLC_RS19220 and ECOLC_RS19215)	Acetolactate synthase	Valine, Leucine, and Isoleucine Metabolism	0	0	1000	0				Experimental Esentially/Originally Reported
ACMANAptspp	pep[c] + acmana[p] -> acmanap[c] + pyr[c]	"	N-acetyl-D-mannosamine transport via PTS (periplasm)	"	0	0	1000	0				Added by Experimental Esentially
ACMUMptspp	pep[c] + acmum[p] -> acmum6p[c] + pyr[c]	ECOLC_RS06760 and ECOLC_RS06705 and ECOLC_RS06770 and ECOLC_RS06765	N-acetylmuramate transport via PEP:Pyr PTS (periplasm)	"	0	0	1000	0				Added by Experimental Esentially
ACOAD1f	btcoa[c] + fad[c] <=> fadh2[c] + b2coa[c]	ECOLC_RS18245	Acyl-CoA dehydrogenase (butanoyl-CoA)	Membrane Lipid Metabolism	1	-1000	1000	0				Originally Reported
ACOAD2f	hxcoa[c] + fad[c] <=> fadh2[c] + hx2coa[c]	ECOLC_RS18245	Acyl-CoA dehydrogenase (hexanoyl-CoA)	Membrane Lipid Metabolism	1	-1000	1000	0				Originally Reported
ACOAD3f	occoa[c] + fad[c] <=> fadh2[c] + oc2coa[c]	ECOLC_RS18245	Acyl-CoA dehydrogenase (octanoyl-CoA)	Membrane Lipid Metabolism	1	-1000	1000	0				Originally Reported
ACOAD4f	dcacoa[c] + fad[c] <=> fadh2[c] + dc2coa[c]	ECOLC_RS18245	Acyl-CoA dehydrogenase (decanoyl-CoA)	Membrane Lipid Metabolism	1	-1000	1000	0				Originally Reported
ACOAD5f	ddcacoa[c] + fad[c] <=> fadh2[c] + dd2coa[c]	ECOLC_RS18245	Acyl-CoA dehydrogenase (dodecanoyl-CoA)	Membrane Lipid Metabolism	1	-1000	1000	0				Originally Reported
ACOAD6f	tdcoa[c] + fad[c] <=> fadh2[c] + td2coa[c]	ECOLC_RS18245	Acyl-CoA dehydrogenase (tetradecanoyl-CoA)	Membrane Lipid Metabolism	1	-1000	1000	0				Originally Reported
ACOAD7f	pmtcoa[c] + fad[c] <=> fadh2[c] + hdd2coa[c]	ECOLC_RS18245	Acyl-CoA dehydrogenase (hexadecanoyl-CoA)	Membrane Lipid Metabolism	1	-1000	1000	0				Originally Reported
ACODA	acorn[c] + h2o[c] -> ac[c] + orn[c]	ECOLC_RS21865	Acetylornithine deacetylase	Arginine and Proline Metabolism	0	0	1000	0				Experimental Esentially/Originally Reported
ACONTa	cit[c] <=> h2o[c] + acon__C[c]	ECOLC_RS19015 or ECOLC_RS12585	Aconitase (half-reaction A, Citrate hydro-lyase)	Citric Acid Cycle	1	-1000	1000	0				Originally Reported
ACONTb	h2o[c] + acon__C[c] <=> icit[c]	ECOLC_RS19015 or ECOLC_RS12585	Aconitase (half-reaction B, Isocitrate hydro-lyase)	Citric Acid Cycle	1	-1000	1000	0				Originally Reported
ACOTA	akg[c] + acorn[c] <=> acg5sa[c] + glu__L[c]	ECOLC_RS10130 or ECOLC_RS01870	Acetylornithine transaminase	Arginine and Proline Metabolism	1	-1000	1000	0				Originally Reported
ACPPAT160	h[c] + pi[c] + palmACP[c] -> hdcap[c] + ACP[c]	ECOLC_RS13450 and ECOLC_RS13470	Acyl-(acyl carrier protein):phosphate acyltransferase (C16:0)	Glycerophospholipid Metabolism	0	0	1000	0				Originally Reported
ACPPAT161	h[c] + hdeACP[c] + pi[c] -> hdceap[c] + ACP[c]	ECOLC_RS13450 and ECOLC_RS13470	Acyl-(acyl carrier protein):phosphate acyltransferase (C16:1)	Glycerophospholipid Metabolism	0	0	1000	0				Originally Reported
ACt2rpp	h[p] + ac[p] <=> h[c] + ac[c]	ECOLC_RS19570	Acetate reversible transport via proton symport (periplasm)	Transport, Inner Membrane	1	-1000	1000	0				Originally Reported
ACtex	ac[e] <=> ac[p]	ECOLC_RS17950 or ECOLC_RS14330 or ECOLC_RS12200 or ECOLC_RS07685	Acetate transport via diffusion (extracellular to periplasm)	Transport, Outer Membrane Porin	1	-1000	1000	0				Originally Reported
ADCL	4adcho[c] -> h[c] + pyr[c] + 4abz[c]	ECOLC_RS13440	4-aminobenzoate synthase	Cofactor and Prosthetic Group Biosynthesis	0	0	1000	0				Originally Reported
ADCS	chor[c] + gln__L[c] -> glu__L[c] + 4adcho[c]	ECOLC_RS01865 and ECOLC_RS09795	4-amino-4-deoxychorismate synthase	Cofactor and Prosthetic Group Biosynthesis	0	0	1000	0				Experimental Esentially/Originally Reported
ADK1	atp[c] + amp[c] <=> 2 adp[c]	ECOLC_RS16895	Adenylate kinase	Nucleotide Salvage Pathway	1	-1000	1000	0				Originally Reported
ADNK1	atp[c] + adn[c] -> h[c] + adp[c] + amp[c]	ECOLC_RS16895	Adenosine kinase	Nucleotide Salvage Pathway	0	0	1000	0				Originally Reported
ADSK	atp[c] + aps[c] -> h[c] + adp[c] + paps[c]	ECOLC_RS05135	Adenylyl-sulfate kinase	Cysteine Metabolism	0	0	1000	0				Experimental Esentially/Originally Reported
ADSL1r	dcamp[c] <=> fum[c] + amp[c]	ECOLC_RS13270	Adenylsuccinate lyase	Purine and Pyrimidine Biosynthesis	1	-1000	1000	0				Originally Reported
ADSL2r	25aics[c] <=> aicar[c] + fum[c]	ECOLC_RS13270	Adenylosuccinate lyase	Purine and Pyrimidine Biosynthesis	1	-1000	1000	0				Originally Reported
ADSS	asp__L[c] + imp[c] + gtp[c] -> 2 h[c] + pi[c] + gdp[c] + dcamp[c]	ECOLC_RS20625	Adenylosuccinate synthase	Purine and Pyrimidine Biosynthesis	0	0	1000	0				Experimental Esentially/Originally Reported
AGPAT160	1hdecg3p[c] + palmACP[c] -> pa160[c] + ACP[c]	ECOLC_RS03605	1-hexadecanoyl-sn-glycerol 3-phosphate O-acyltransferase (n-C16:0)	Glycerophospholipid Metabolism	0	0	1000	0				Originally Reported
AGPAT161	hdeACP[c] + 1hdec9eg3p[c] -> pa161[c] + ACP[c]	ECOLC_RS03605	1-hexadec-7-enoyl-sn-glycerol 3-phosphate O-acyltransferase (n-C16:1)	Glycerophospholipid Metabolism	0	0	1000	0				Originally Reported
AGPR	acg5sa[c] + pi[c] + nadp[c] <=> h[c] + nadph[c] + acg5p[c]	ECOLC_RS21860	N-acetyl-g-glutamyl-phosphate reductase	Arginine and Proline Metabolism	1	-1000	1000	0				Originally Reported
AHCYSNS	ahcys[c] + h2o[c] -> rhcys[c] + ade[c]	ECOLC_RS18805	S-adenosylhomocysteine nucleosidase	Methionine Metabolism	0	0	1000	0				Originally Reported
AHGDx	nad[c] + S2hglut[c] <=> h[c] + akg[c] + nadh[c]	"	(S)-alpha-hydroxyglutarate dehydrogenase	"	1	-1000	1000	0				Added by Experimental Esentially
AICART	10fthf[c] + aicar[c] <=> thf[c] + fprica[c]	ECOLC_RS21620	Phosphoribosylaminoimidazolecarboxamide formyltransferase	Purine and Pyrimidine Biosynthesis	1	-1000	1000	0				Experimental Esentially/Originally Reported
AIRC2	air[c] + atp[c] + hco3[c] -> h[c] + adp[c] + pi[c] + 5caiz[c]	ECOLC_RS16680	Phosphoribosylaminoimidazole carboxylase	Purine and Pyrimidine Biosynthesis	0	0	1000	0				Experimental Esentially/Originally Reported
AIRC3	5aizc[c] <=> 5caiz[c]	ECOLC_RS16675	Phosphoribosylaminoimidazole carboxylase (mutase rxn)	Purine and Pyrimidine Biosynthesis	1	-1000	1000	0				Experimental Esentially/Originally Reported
AKGDH	akg[c] + nad[c] + coa[c] -> nadh[c] + co2[c] + succoa[c]	ECOLC_RS19025 and ECOLC_RS15740 and ECOLC_RS15735	2-Oxogluterate dehydrogenase	Citric Acid Cycle	0	0	1000	0				Originally Reported
ALAALAr	atp[c] + 2 ala__D[c] <=> h[c] + adp[c] + pi[c] + alaala[c]	ECOLC_RS17470 or ECOLC_RS19145	D-alanine-D-alanine ligase (reversible)	Cell Envelope Biosynthesis	1	-1000	1000	0				Originally Reported
ALAR	ala__L[c] <=> ala__D[c]	ECOLC_RS13060 or ECOLC_RS21370	Alanine racemase	Alanine and Aspartate Metabolism	1	-1000	1000	0				Originally Reported
ALATA_D2	pydx5p[c] + ala__D[c] -> pyam5p[c] + pyr[c]	ECOLC_RS06065 or ECOLC_RS14645	D-alanine transaminase	"	0	0	1000	0				Added by Experimental Esentially
ALATA_L	akg[c] + ala__L[c] <=> glu__L[c] + pyr[c]	ECOLC_RS07315 or ECOLC_RS06940	L-alanine transaminase	Alanine and Aspartate Metabolism	1	-1000	1000	0				Originally Reported
ALATA_L2	pydx5p[c] + ala__L[c] -> pyam5p[c] + pyr[c]	ECOLC_RS14645 or ECOLC_RS06065	Alanine transaminase	"	0	0	1000	0				Added by Experimental Esentially
ALCD2x	nad[c] + etoh[c] <=> h[c] + acald[c] + nadh[c]	ECOLC_RS11670 or ECOLC_RS12785 or ECOLC_RS17565	Alcohol dehydrogenase (ethanol)	Pyruvate Metabolism	1	-1000	1000	0				Originally Reported
AMAOTr	amet[c] + 8aonn[c] <=> dann[c] + amob[c]	ECOLC_RS15390	Adenosylmethionine-8-amino-7-oxononanoate transaminase	Cofactor and Prosthetic Group Biosynthesis	1	-1000	1000	0				Originally Reported
AMPMS2	nad[c] + air[c] + h2o[c] -> 3 h[c] + 4ampm[c] + nadh[c] + 2 for[c]	ECOLC_RS21680	4-amino-2-methyl-5-phosphomethylpyrimidine synthetase	Cofactor and Prosthetic Group Biosynthesis	0	0	1000	0				Originally Reported
ANPRT	anth[c] + prpp[c] -> pran[c] + ppi[c]	ECOLC_RS12670	Anthranilate phosphoribosyltransferase	Tyrosine, Tryptophan, and Phenylalanine Metabolism	0	0	1000	0				Experimental Esentially/Originally Reported
ANS	chor[c] + gln__L[c] -> h[c] + glu__L[c] + anth[c] + pyr[c]	ECOLC_RS12670 and ECOLC_RS12665	Anthranilate synthase	Tyrosine, Tryptophan, and Phenylalanine Metabolism	0	0	1000	0				Experimental Esentially/Originally Reported
AOXSr2	pimACP[c] + ala__L[c] -> 8aonn[c] + co2[c] + ACP[c]	ECOLC_RS15380	8-amino-7-oxononanoate synthase	Cofactor and Prosthetic Group Biosynthesis	0	0	1000	0				Originally Reported
APG3PAT160	glyc3p[c] + hdcap[c] -> h[c] + 1hdecg3p[c] + pi[c]	ECOLC_RS03390	Acyl-phosphate:glycerol-3-phosphate acyltransferase (C16:0)	Glycerophospholipid Metabolism	0	0	1000	0				Originally Reported
APG3PAT161	glyc3p[c] + hdceap[c] -> h[c] + pi[c] + 1hdec9eg3p[c]	ECOLC_RS03390	Acyl-phosphate:glycerol-3-phosphate acyltransferase (C16:1)	Glycerophospholipid Metabolism	0	0	1000	0				Originally Reported
APRAUR	h[c] + 5apru[c] + nadph[c] -> nadp[c] + 5aprbu[c]	ECOLC_RS17295	5-amino-6-(5-phosphoribosylamino)uracil reductase	Cofactor and Prosthetic Group Biosynthesis	0	0	1000	0				Originally Reported
ARBTptspp	pep[c] + arbt[p] -> arbt6p[c] + pyr[c]	(ECOLC_RS23070 and ECOLC_RS06770 and ECOLC_RS06765) or (ECOLC_RS05315 and ECOLC_RS06770 and ECOLC_RS06765)	Arbutin transport via PEP:Pyr PTS (periplasm)	"	0	0	1000	0				Added by Experimental Esentially
ARGSL	argsuc[c] <=> arg__L[c] + fum[c]	ECOLC_RS21850	Argininosuccinate lyase	Arginine and Proline Metabolism	1	-1000	1000	0				Experimental Esentially/Originally Reported
ARGSS	citr__L[c] + asp__L[c] + atp[c] -> h[c] + argsuc[c] + ppi[c] + amp[c]	ECOLC_RS02800	Argininosuccinate synthase	Arginine and Proline Metabolism	0	0	1000	0				Originally Reported
ARHGDx	nad[c] + r2hglut[c] <=> h[c] + akg[c] + nadh[c]	"	(R)-alpha-hydroxyglutarate dehydrogenase	"	1	-1000	1000	0				Added by Experimental Esentially
ASAD	aspsa[c] + pi[c] + nadp[c] <=> h[c] + nadph[c] + 4pasp[c]	ECOLC_RS01495	Aspartate-semialdehyde dehydrogenase	Threonine and Lysine Metabolism	1	-1000	1000	0				Originally Reported
ASCBptspp	pep[c] + ascb__L[p] -> ascb6p[c] + pyr[c]	ECOLC_RS06770 and ECOLC_RS06765 and ECOLC_RS20535 and ECOLC_RS20540 and ECOLC_RS20545	L-ascorbate transport via PEP:Pyr PTS (periplasm)	"	0	0	1000	0				Added by Experimental Esentially
ASNS2	asp__L[c] + nh4[c] + atp[c] -> h[c] + ppi[c] + asn__L[c] + amp[c]	ECOLC_RS22960	Asparagine synthetase	Alanine and Aspartate Metabolism	0	0	1000	0				Originally Reported
ASP1DC	h[c] + asp__L[c] -> ala_B[c] + co2[c]	ECOLC_RS18950	Aspartate 1-decarboxylase	Cofactor and Prosthetic Group Biosynthesis	0	0	1000	0				Experimental Esentially/Originally Reported
ASPCT	asp__L[c] + cbp[c] -> h[c] + pi[c] + cbasp[c]	(ECOLC_RS20265 and ECOLC_RS20260) or ECOLC_RS20260	Aspartate carbamoyltransferase	Purine and Pyrimidine Biosynthesis	0	0	1000	0				Experimental Esentially/Originally Reported
ASPK	asp__L[c] + atp[c] <=> adp[c] + 4pasp[c]	ECOLC_RS19615 or ECOLC_RS21955 or ECOLC_RS21535	Aspartate kinase	Threonine and Lysine Metabolism	1	-1000	1000	0				Experimental Esentially/Originally Reported
ASPO3	asp__L[c] + q8[c] -> h[c] + q8h2[c] + iasp[c]	ECOLC_RS05930	L-aspartate oxidase	"	0	0	1000	0				Added by Experimental Esentially
ASPO4	asp__L[c] + mqn8[c] -> h[c] + iasp[c] + mql8[c]	ECOLC_RS05930	L-aspartate oxidase	"	0	0	1000	0				Added by Experimental Esentially
ASPO5	asp__L[c] + fum[c] -> h[c] + iasp[c] + succ[c]	ECOLC_RS05930	L-aspartate oxidase	Cofactor and Prosthetic Group Biosynthesis	0	0	1000	0				Experimental Esentially/Originally Reported
ASPO6	asp__L[c] + o2[c] -> h[c] + h2o2[c] + iasp[c]	ECOLC_RS05930	L-aspartate oxidase	"	0	0	1000	0				Added by Experimental Esentially
ASPTA	akg[c] + asp__L[c] <=> glu__L[c] + oaa[c]	ECOLC_RS14340	Aspartate transaminase	Alanine and Aspartate Metabolism	1	-1000	1000	0				Originally Reported
ATPM	atp[c] + h2o[c] -> h[c] + adp[c] + pi[c]	"	ATP maintenance requirement	Unassigned	0	6.86	1000	0				Originally Reported
ATPPRT	atp[c] + prpp[c] -> prbatp[c] + ppi[c]	ECOLC_RS08675	ATP phosphoribosyltransferase	Histidine Metabolism	0	0	1000	0				Experimental Esentially/Originally Reported
ATPS4rpp	4 h[p] + adp[c] + pi[c] <=> 3 h[c] + atp[c] + h2o[c]	((ECOLC_RS23000 and ECOLC_RS22995 and ECOLC_RS22990) and (ECOLC_RS23025 and ECOLC_RS23020 and ECOLC_RS23015 and ECOLC_RS23010 and ECOLC_RS23005) and ECOLC_RS22985) or ((ECOLC_RS23000 and ECOLC_RS22995 and ECOLC_RS22990) and (ECOLC_RS23025 and ECOLC_RS2302	ATP synthase (four protons for one ATP) (periplasm)	Oxidative Phosphorylation	1	-1000	1000	0				Experimental Esentially/Originally Reported
BIOMASS_Ec_iML1515_core_75p37M	0.000691 mn2[c] + 0.000223 10fthf[c] + 0.000223 pydx5p[c] + 0.25369 thr__L[c] + 0.000223 thmpp[c] + 0.000323 ni2[c] + 0.21579 ser__L[c] + 0.000223 sheme[c] + 0.13351 ctp[c] + 0.29579 arg__L[c] + 0.001831 nad[c] + 0.008675 mg2[c] + 0.24105 asp__L[c] + 0.15369 met__L[c] + 0.000223 amet[c] + 0.013013 nh4[c] + 0.000341 zn2[c] + 0.1379 tyr__L[c] + 0.09158 cys__L[c] + 75.5522 atp[c] + 0.000223 thf[c] +…	"	E. coli biomass objective function (iML1515) - core - with 75.37 GAM estimate	"	0	0	1000	1				Change based on iML1515
BMOCOS	mptamp[c] + moco[c] -> bmoco[c] + cu2[c] + amp[c]	ECOLC_RS15110	Bis-molybdenum cofactor synthase	Cofactor and Prosthetic Group Biosynthesis	0	0	1000	0				Originally Reported
BMOGDS1	h[c] + bmoco[c] + gtp[c] -> bmoco1gdp[c] + ppi[c]	ECOLC_RS22410 or (ECOLC_RS22410 and ECOLC_RS22415)	Bis-molybdopterin guanine dinucleotide synthase (single GDP)	Cofactor and Prosthetic Group Biosynthesis	0	0	1000	0				Originally Reported
BMOGDS2	h[c] + bmoco1gdp[c] + gtp[c] -> bmocogdp[c] + ppi[c]	ECOLC_RS22410 or (ECOLC_RS22410 and ECOLC_RS22415)	Bis-molybdopterin guanine dinucleotide synthase	Cofactor and Prosthetic Group Biosynthesis	0	0	1000	0				Originally Reported
BPNT	pap[c] + h2o[c] -> pi[c] + amp[c]	ECOLC_RS20395	3,5-bisphosphate nucleotidase	Cysteine Metabolism	0	0	1000	0				Experimental Esentially/Originally Reported
BTS5	amet[c] + 2fe2s[c] + dtbt[c] -> h[c] + met__L[c] + dad_5[c] + 2fe1s[c] + btn[c]	ECOLC_RS15385	Biotin synthase	Cofactor and Prosthetic Group Biosynthesis	0	0	1000	0				Originally Reported
CA2tex	ca2[e] <=> ca2[p]	ECOLC_RS17950 or ECOLC_RS14330 or ECOLC_RS12200 or ECOLC_RS07685	Calcium (Ca+2) transport via diffusion (extracellular to periplasm)	Transport, Outer Membrane Porin	1	-1000	1000	0				Originally Reported
CAt6pp	na1[p] + ca2[c] <=> ca2[p] + na1[c]	ECOLC_RS02680	Calcium / sodium antiporter (1:1)	Inorganic Ion Transport and Metabolism	1	-1000	1000	0				Originally Reported
CBMKr	nh4[c] + atp[c] + co2[c] <=> 2 h[c] + adp[c] + cbp[c]	ECOLC_RS16685 or ECOLC_RS17725 or ECOLC_RS04440	Carbamate kinase	Unassigned	1	-1000	1000	0				Originally Reported
CBPS	2 atp[c] + gln__L[c] + hco3[c] + h2o[c] -> 2 h[c] + 2 adp[c] + pi[c] + cbp[c] + glu__L[c]	ECOLC_RS19445 and ECOLC_RS19440	Carbamoyl-phosphate synthase (glutamine-hydrolysing)	"	0	0	1000	0				Added by Experimental Esentially
CDPMEK	4c2me[c] + atp[c] -> h[c] + 2p4c2me[c] + adp[c]	ECOLC_RS12965	4-(cytidine 5-diphospho)-2-C-methyl-D-erythritol kinase	Cofactor and Prosthetic Group Biosynthesis	0	0	1000	0				Originally Reported
CELBpts	pep[c] + cellb[e] -> 6pgg[c] + pyr[c]	"	Cellobiose transport via PEPPyr PTS	"	0	0	1000	0				Added by Experimental Esentially
CHORM	chor[c] -> pphn[c]	ECOLC_RS05795 or ECOLC_RS05790	Chorismate mutase	Tyrosine, Tryptophan, and Phenylalanine Metabolism	0	0	1000	0				Experimental Esentially/Originally Reported
CHORS	3psme[c] -> pi[c] + chor[c]	ECOLC_RS07115	Chorismate synthase	Tyrosine, Tryptophan, and Phenylalanine Metabolism	0	0	1000	0				Experimental Esentially/Originally Reported
CHRPL	chor[c] -> 4hbz[c] + pyr[c]	ECOLC_RS21440	Chorismate pyruvate lyase	Cofactor and Prosthetic Group Biosynthesis	0	0	1000	0				Originally Reported
CHTBSptspp	chtbs[p] + pep[c] -> chtbs6p[c] + pyr[c]	ECOLC_RS06765	Chitobiose transport via PEP:Pyr PTS (periplasm)	"	0	0	1000	0				Added by Experimental Esentially
CLt3_2pp	h[c] + 2 cl[p] -> h[p] + 2 cl[c]	ECOLC_RS18825 or ECOLC_RS10945	Chloride transport out via proton antiport (2:1) (periplasm)	Inorganic Ion Transport and Metabolism	0	0	1000	0				Originally Reported
CLtex	cl[e] <=> cl[p]	ECOLC_RS17950 or ECOLC_RS14330 or ECOLC_RS12200 or ECOLC_RS07685	Chloride (Cl-1) transport via diffusion (extracellular to periplasm)	Transport, Outer Membrane Porin	1	-1000	1000	0				Originally Reported
CO2tex	co2[e] <=> co2[p]	ECOLC_RS17950 or ECOLC_RS14330 or ECOLC_RS12200 or ECOLC_RS07685	CO2 transport via diffusion (extracellular to periplasm)	Transport, Outer Membrane Porin	1	-1000	1000	0				Originally Reported
CO2tpp	co2[p] <=> co2[c]	s0001	CO2 transporter via diffusion (periplasm)	Transport, Inner Membrane	1	-1000	1000	0				Originally Reported
COBALT2tex	cobalt2[e] <=> cobalt2[p]	ECOLC_RS17950 or ECOLC_RS14330 or ECOLC_RS12200 or ECOLC_RS07685	Cobalt (Co+2) transport via diffusion (extracellular to periplasm)	Transport, Outer Membrane Porin	1	-1000	1000	0				Originally Reported
COBALT2tpp	cobalt2[p] -> cobalt2[c]	ECOLC_RS03495 or ECOLC_RS22605	Cobalt transport in via permease (no H+)	Inorganic Ion Transport and Metabolism	0	0	1000	0				Originally Reported
CPMPS	h2o[c] + gtp[c] -> cpmp[c] + ppi[c]	ECOLC_RS15350 and ECOLC_RS15340	Cyclic pyranopterin monophosphate synthase	Cofactor and Prosthetic Group Biosynthesis	0	0	1000	0				Originally Reported
CPPPGO2	2 amet[c] + cpppg3[c] -> 2 met__L[c] + 2 dad_5[c] + pppg9[c] + 2 co2[c]	ECOLC_RS22360	Oxygen Independent coproporphyrinogen-III oxidase	Cofactor and Prosthetic Group Biosynthesis	0	0	1000	0				Originally Reported
CS	accoa[c] + h2o[c] + oaa[c] -> h[c] + cit[c] + coa[c]	ECOLC_RS15775	Citrate synthase	Citric Acid Cycle	0	0	1000	0				Experimental Esentially/Originally Reported
CTECOAI7	hdcoa[c] <=> hdd2coa[c]	ECOLC_RS22465	3-cis-2-trans-enoyl-CoA isomerase	"	1	-1000	1000	0				Change based on iML1515
CTPS2	atp[c] + utp[c] + gln__L[c] + h2o[c] -> 2 h[c] + ctp[c] + adp[c] + pi[c] + glu__L[c]	ECOLC_RS04985	CTP synthase (glutamine)	Purine and Pyrimidine Biosynthesis	0	0	1000	0				Originally Reported
CU2tex	cu2[e] <=> cu2[p]	ECOLC_RS07685 or ECOLC_RS17950 or ECOLC_RS14330 or ECOLC_RS12200	Copper (Cu+2) transport via diffusion (extracellular to periplasm)	Transport, Outer Membrane Porin	1	-1000	1000	0				Originally Reported
CU2tpp	cu2[p] -> cu2[c]	ECOLC_RS03495	Copper transport in via permease (no H+)	Inorganic Ion Transport and Metabolism	0	0	1000	0				Originally Reported
CYSDS	cys__L[c] + h2o[c] -> h2s[c] + nh4[c] + pyr[c]	ECOLC_RS23140 or ECOLC_RS03655	Cysteine Desulfhydrase	"	0	0	1000	0				Added by Experimental Esentially
CYSS	h2s[c] + acser[c] -> h[c] + ac[c] + cys__L[c]	ECOLC_RS06775 or ECOLC_RS06745	Cysteine synthase	Cysteine Metabolism	0	0	1000	0				Experimental Esentially/Originally Reported
CYSTL	cyst__L[c] + h2o[c] -> nh4[c] + pyr[c] + hcys__L[c]	ECOLC_RS10790 or ECOLC_RS03655	Cystathionine b-lyase	Methionine Metabolism	0	0	1000	0				Experimental Esentially/Originally Reported
CYTBO3_4pp	4 h[c] + 0.5 o2[c] + q8h2[c] -> 4 h[p] + h2o[c] + q8[c]	ECOLC_RS17220 and ECOLC_RS17215 and ECOLC_RS17210 and ECOLC_RS17205	Cytochrome oxidase bo3 (ubiquinol-8: 4 protons) (periplasm)	Oxidative Phosphorylation	0	0	1000	0				Originally Reported
CYTK1	atp[c] + cmp[c] <=> adp[c] + cdp[c]	ECOLC_RS14430	Cytidylate kinase (CMP)	Nucleotide Salvage Pathway	1	-1000	1000	0				Originally Reported
D_LACt2pp	h[p] + lac__D[p] <=> h[c] + lac__D[c]	ECOLC_RS00555 or ECOLC_RS03855	D-lactate transport via proton symport (periplasm)	Transport, Inner Membrane	1	-1000	1000	0				Originally Reported
D_LACtex	lac__D[e] <=> lac__D[p]	ECOLC_RS17950 or ECOLC_RS14330 or ECOLC_RS12200 or ECOLC_RS07685	D-lactate transport via diffusion (extracellular to periplasm)	Transport, Outer Membrane Porin	1	-1000	1000	0				Originally Reported
DADK	atp[c] + damp[c] <=> dadp[c] + adp[c]	ECOLC_RS16895	Deoxyadenylate kinase	"	1	-1000	1000	0				Change based on iML1515
DALAt2pp	h[p] + ala__D[p] -> h[c] + ala__D[c]	ECOLC_RS20425	D-alanine transport in via proton symport (periplasm)	Transport, Inner Membrane	0	0	1000	0				Originally Reported
DAPDC	h[c] + 26dap__M[c] -> lys__L[c] + co2[c]	ECOLC_RS04680	Diaminopimelate decarboxylase	Threonine and Lysine Metabolism	0	0	1000	0				Experimental Esentially/Originally Reported
DAPE	26dap_LL[c] <=> 26dap__M[c]	ECOLC_RS22640	Diaminopimelate epimerase	Threonine and Lysine Metabolism	1	-1000	1000	0				Originally Reported
DASYN160	h[c] + pa160[c] + ctp[c] -> ppi[c] + cdpdhdecg[c]	ECOLC_RS18730	CDP-diacylglycerol synthetase (n-C16:0)	Glycerophospholipid Metabolism	0	0	1000	0				Originally Reported
DASYN161	h[c] + ctp[c] + pa161[c] -> cdpdhdec9eg[c] + ppi[c]	ECOLC_RS18730	CDP-diacylglycerol synthetase (n-C16:1)	Glycerophospholipid Metabolism	0	0	1000	0				Originally Reported
DB4PS	ru5p__D[c] -> h[c] + db4p[c] + for[c]	ECOLC_RS03485	3,4-Dihydroxy-2-butanone-4-phosphate synthase	Cofactor and Prosthetic Group Biosynthesis	0	0	1000	0				Originally Reported
DBTS	atp[c] + dann[c] + co2[c] -> 3 h[c] + adp[c] + pi[c] + dtbt[c]	ECOLC_RS15370	Dethiobiotin synthase	Cofactor and Prosthetic Group Biosynthesis	0	0	1000	0				Originally Reported
DDPA	pep[c] + e4p[c] + h2o[c] -> pi[c] + 2dda7p[c]	ECOLC_RS05785 or ECOLC_RS15585 or ECOLC_RS10355	3-deoxy-D-arabino-heptulosonate 7-phosphate synthetase	Tyrosine, Tryptophan, and Phenylalanine Metabolism	0	0	1000	0				Originally Reported
DHAD1	23dhmb[c] -> 3mob[c] + h2o[c]	ECOLC_RS22835	Dihydroxy-acid dehydratase (2,3-dihydroxy-3-methylbutanoate)	Valine, Leucine, and Isoleucine Metabolism	0	0	1000	0				Experimental Esentially/Originally Reported
DHAD2	23dhmp[c] -> h2o[c] + 3mop[c]	ECOLC_RS22835	Dihydroxy-acid dehydratase (2,3-dihydroxy-3-methylpentanoate)	Valine, Leucine, and Isoleucine Metabolism	0	0	1000	0				Experimental Esentially/Originally Reported
DHAPT	pep[c] + dha[c] -> dhap[c] + pyr[c]	ECOLC_RS13010 and ECOLC_RS13015 and ECOLC_RS13020 and ECOLC_RS06770 and ECOLC_RS06765	Dihydroxyacetone phosphotransferase	"	0	0	1000	0				Added by Experimental Esentially
DHDPRy	h[c] + nadph[c] + 23dhdp[c] -> nadp[c] + thdp[c]	ECOLC_RS19460	Dihydrodipicolinate reductase (NADPH)	Threonine and Lysine Metabolism	0	0	1000	0				Originally Reported
DHDPS	aspsa[c] + pyr[c] -> h[c] + 2 h2o[c] + 23dhdp[c]	ECOLC_RS06435	Dihydrodipicolinate synthase	Threonine and Lysine Metabolism	0	0	1000	0				Originally Reported
DHFR	h[c] + nadph[c] + dhf[c] <=> thf[c] + nadp[c]	ECOLC_RS10870 or ECOLC_RS19360	Dihydrofolate reductase	Cofactor and Prosthetic Group Biosynthesis	1	-1000	1000	0				Originally Reported
DHFS	atp[c] + glu__L[c] + dhpt[c] -> h[c] + adp[c] + pi[c] + dhf[c]	ECOLC_RS07185	Dihydrofolate synthase	Cofactor and Prosthetic Group Biosynthesis	0	0	1000	0				Originally Reported
DHNPA2r	dhnpt[c] <=> 6hmhpt[c] + gcald[c]	ECOLC_RS03395	Dihydroneopterin aldolase reversible	Cofactor and Prosthetic Group Biosynthesis	1	-1000	1000	0				Experimental Esentially/Originally Reported
DHNPTE	dhnpt[c] <=> dhmpt[c]	ECOLC_RS03395	Dihydroneopterin epimerase	"	1	-1000	1000	0				Added by Experimental Esentially
DHORD2	dhor__S[c] + q8[c] -> q8h2[c] + orot[c]	ECOLC_RS14250	Dihydoorotic acid dehydrogenase (quinone8)	"	0	0	1000	0				Added by Experimental Esentially
DHORD5	dhor__S[c] + mqn8[c] -> orot[c] + mql8[c]	ECOLC_RS14250	Dihydroorotic acid (menaquinone-8)	"	0	0	1000	0				Added by Experimental Esentially
DHORDfum	dhor__S[c] + fum[c] -> orot[c] + succ[c]	"	Fumarate dependent DHORD	Purine and Pyrimidine Biosynthesis	0	0	1000	0				Originally Reported
DHORTS	dhor__S[c] + h2o[c] <=> h[c] + cbasp[c]	ECOLC_RS13610	Dihydroorotase	Purine and Pyrimidine Biosynthesis	1	-1000	1000	0				Experimental Esentially/Originally Reported
DHPPDA2	h[c] + h2o[c] + 25drapp[c] -> 5apru[c] + nh4[c]	ECOLC_RS17295	Diaminohydroxyphosphoribosylaminopryrimidine deaminase (25drapp)	Cofactor and Prosthetic Group Biosynthesis	0	0	1000	0				Originally Reported
DHPS2	6hmhptpp[c] + 4abz[c] -> ppi[c] + dhpt[c]	ECOLC_RS02775	Dihydropteroate synthase	Cofactor and Prosthetic Group Biosynthesis	0	0	1000	0				Experimental Esentially/Originally Reported
DHPTDCs2	dhptd[c] -> mdhdhf[c]	s0001	4,5-dihydroxy-2,3-pentanedione cyclization (spontaneous)	Methionine Metabolism	0	0	1000	0				Originally Reported
DHQS	2dda7p[c] -> pi[c] + 3dhq[c]	ECOLC_RS01725	3-dehydroquinate synthase	Tyrosine, Tryptophan, and Phenylalanine Metabolism	0	0	1000	0				Experimental Esentially/Originally Reported
DHQTi	3dhq[c] -> 3dhsk[c] + h2o[c]	ECOLC_RS10420	3-dehydroquinate dehydratase, irreversible	Tyrosine, Tryptophan, and Phenylalanine Metabolism	0	0	1000	0				Experimental Esentially/Originally Reported
DM_4crsol	4crsol[c] ->	"	Sink needed to allow p-Cresol to leave system	Intracellular demand	0	0	1000	0				Originally Reported
DM_5drib	5drib[c] ->	"	Sink needed to allow 5-deoxyribose to leave system	Intracellular demand	0	0	1000	0				Originally Reported
DM_amob	amob[c] ->	"	Sink needed to allow S-Adenosyl-4-methylthio-2-oxobutanoate to leave system	Intracellular demand	0	0	1000	0				Originally Reported
DM_mththf	mththf[c] ->	"	Sink needed to allow (2R,4S)-2-methyl-2,3,3,4-tetrahydroxytetrahydrofuran to leave system	Intracellular demand	0	0	1000	0				Originally Reported
DMATT	ipdp[c] + dmpp[c] -> grdp[c] + ppi[c]	ECOLC_RS17260	Dimethylallyltranstransferase	Cofactor and Prosthetic Group Biosynthesis	0	0	1000	0				Originally Reported
DMQMT	amet[c] + 2omhmbl[c] -> h[c] + q8h2[c] + ahcys[c]	ECOLC_RS07600	3-Dimethylubiquinonol 3-methyltransferase	"	0	0	1000	0				Added by Experimental Esentially
DNMPPA	dhpmp[c] + h2o[c] -> pi[c] + dhnpt[c]	"	Dihydroneopterin monophosphate dephosphorylase	Cofactor and Prosthetic Group Biosynthesis	0	0	1000	0				Originally Reported
DNTPPA	h2o[c] + ahdt[c] -> h[c] + dhpmp[c] + ppi[c]	ECOLC_RS19110 or ECOLC_RS09485	Dihydroneopterin triphosphate pyrophosphatase	Cofactor and Prosthetic Group Biosynthesis	0	0	1000	0				Originally Reported
DPCOAK	atp[c] + dpcoa[c] -> h[c] + adp[c] + coa[c]	ECOLC_RS19090	Dephospho-CoA kinase	Cofactor and Prosthetic Group Biosynthesis	0	0	1000	0				Originally Reported
DPR	h[c] + 2dhp[c] + nadph[c] -> nadp[c] + pant__R[c]	ECOLC_RS17240 or ECOLC_RS22820	2-dehydropantoate 2-reductase	Cofactor and Prosthetic Group Biosynthesis	0	0	1000	0				Experimental Esentially/Originally Reported
DTMPK	atp[c] + dtmp[c] <=> adp[c] + dtdp[c]	ECOLC_RS13430	DTMP kinase	Nucleotide Salvage Pathway	1	-1000	1000	0				Originally Reported
DURIK1	duri[c] + atp[c] -> h[c] + adp[c] + dump[c]	ECOLC_RS12800	Deoxyuridine kinase (ATP:Deoxyuridine)	Nucleotide Salvage Pathway	0	0	1000	0				Originally Reported
DURIPP	duri[c] + pi[c] <=> 2dr1p[c] + ura[c]	ECOLC_RS19735 or ECOLC_RS19725	Deoxyuridine phosphorylase	Nucleotide Salvage Pathway	1	-1000	1000	0				Originally Reported
DXPRIi	h[c] + dxyl5p[c] + nadph[c] -> 2me4p[c] + nadp[c]	ECOLC_RS18740	1-deoxy-D-xylulose reductoisomerase	Cofactor and Prosthetic Group Biosynthesis	0	0	1000	0				Originally Reported
DXPS	h[c] + g3p[c] + pyr[c] -> dxyl5p[c] + co2[c]	ECOLC_RS17265	1-deoxy-D-xylulose 5-phosphate synthase	Cofactor and Prosthetic Group Biosynthesis	0	0	1000	0				Originally Reported
E4PD	nad[c] + e4p[c] + h2o[c] <=> 2 h[c] + nadh[c] + 4per[c]	ECOLC_RS04175 or ECOLC_RS09965	Erythrose 4-phosphate dehydrogenase	Cofactor and Prosthetic Group Biosynthesis	1	-1000	1000	0				Originally Reported
ECOAH1	3hbcoa[c] <=> h2o[c] + b2coa[c]	ECOLC_RS22465 or ECOLC_RS07060	3-hydroxyacyl-CoA dehydratase (3-hydroxybutanoyl-CoA)	Membrane Lipid Metabolism	1	-1000	1000	0				Originally Reported
ECOAH2	3hhcoa[c] <=> hx2coa[c] + h2o[c]	ECOLC_RS22465 or ECOLC_RS07060	3-hydroxyacyl-CoA dehydratase (3-hydroxyhexanoyl-CoA)	Membrane Lipid Metabolism	1	-1000	1000	0				Originally Reported
ECOAH3	3hocoa[c] <=> h2o[c] + oc2coa[c]	ECOLC_RS22465 or ECOLC_RS07060	3-hydroxyacyl-CoA dehydratase (3-hydroxyoctanoyl-CoA)	Membrane Lipid Metabolism	1	-1000	1000	0				Originally Reported
ECOAH4	3hdcoa[c] <=> dc2coa[c] + h2o[c]	ECOLC_RS22465 or ECOLC_RS07060	3-hydroxyacyl-CoA dehydratase (3-hydroxydecanoyl-CoA)	Membrane Lipid Metabolism	1	-1000	1000	0				Originally Reported
ECOAH5	3hddcoa[c] <=> h2o[c] + dd2coa[c]	ECOLC_RS22465 or ECOLC_RS07060	3-hydroxyacyl-CoA dehydratase (3-hydroxydodecanoyl-CoA)	Membrane Lipid Metabolism	1	-1000	1000	0				Originally Reported
ECOAH6	3htdcoa[c] <=> h2o[c] + td2coa[c]	ECOLC_RS22465 or ECOLC_RS07060	3-hydroxyacyl-CoA dehydratase (3-hydroxytetradecanoyl-CoA)	Membrane Lipid Metabolism	1	-1000	1000	0				Originally Reported
ECOAH7	3hhdcoa[c] <=> h2o[c] + hdd2coa[c]	ECOLC_RS22465 or ECOLC_RS07060	3-hydroxyacyl-CoA dehydratase (3-hydroxyhexadecanoyl-CoA)	Membrane Lipid Metabolism	1	-1000	1000	0				Originally Reported
EDA	2ddg6p[c] -> g3p[c] + pyr[c]	ECOLC_RS09565	2-dehydro-3-deoxy-phosphogluconate aldolase	Pentose Phosphate Pathway	0	0	1000	0				Originally Reported
EDD	6pgc[c] -> h2o[c] + 2ddg6p[c]	ECOLC_RS09560	6-phosphogluconate dehydratase	Pentose Phosphate Pathway	0	0	1000	0				Originally Reported
EGMEACPR	h[c] + egmeACP[c] + nadph[c] -> gmeACP[c] + nadp[c]	ECOLC_RS12515	Enoylglutaryl-[ACP] methyl ester reductase	Cofactor and Prosthetic Group Biosynthesis	0	0	1000	0				Originally Reported
ENO	2pg[c] <=> pep[c] + h2o[c]	ECOLC_RS04990	Enolase	Glycolysis/Gluconeogenesis	1	-1000	1000	0				Originally Reported
ENTERES	3 h2o[c] + enter[c] -> 3 h[c] + 3 23dhbzs[c]	ECOLC_RS16465	Enterochelin Esterase	"	0	0	1000	0				Added by Experimental Esentially
EPMEACPR	h[c] + epmeACP[c] + nadph[c] -> pmeACP[c] + nadp[c]	ECOLC_RS12515	Enoylpimeloyl-[ACP] methyl ester reductase	Cofactor and Prosthetic Group Biosynthesis	0	0	1000	0				Originally Reported
ETOHtex	etoh[e] <=> etoh[p]	ECOLC_RS17950 or ECOLC_RS14330 or ECOLC_RS12200 or ECOLC_RS07685	Ethanol transport via diffusion (extracellular to periplasm)	Transport, Outer Membrane Porin	1	-1000	1000	0				Originally Reported
ETOHtrpp	etoh[p] <=> etoh[c]	s0001	Ethanol reversible transport via diffusion (periplasm)	Transport, Inner Membrane	1	-1000	1000	0				Originally Reported
EX_ac_e	ac[e] ->	"	Acetate exchange	"	0	0	1000	0				Originally Reported
EX_ca2_e	ca2[e] <=>	"	Calcium exchange	"	1	-1000	1000	0				Originally Reported
EX_cl_e	cl[e] <=>	"	Chloride exchange	"	1	-1000	1000	0				Originally Reported
EX_co2_e	co2[e] <=>	"	CO2 exchange	"	1	-1000	1000	0				Originally Reported
EX_cobalt2_e	cobalt2[e] <=>	"	Co2+ exchange	"	1	-1000	1000	0				Originally Reported
EX_cu2_e	cu2[e] <=>	"	Cu2+ exchange	"	1	-1000	1000	0				Originally Reported
EX_etoh_e	etoh[e] ->	"	Ethanol exchange	"	0	0	1000	0				Originally Reported
EX_fe2_e	fe2[e] <=>	"	Fe2+ exchange	"	1	-1000	1000	0				Originally Reported
EX_fe3_e	fe3[e] <=>	"	Fe3+ exchange	"	1	-1000	1000	0				Originally Reported
EX_for_e	for[e] ->	"	Formate exchange	"	0	0	1000	0				Originally Reported
EX_fum_e	fum[e] ->	"	Fumarate exchange	"	0	0	1000	0				Originally Reported
EX_glc__D_e	glc__D[e] <=>	"	D-Glucose exchange	Extracellular exchange	0	0	1000	0				Originally Reported
EX_glyc_e	glyc[e] <=>	"	Glycerol exchange	"	1	-13.3	1000	0				Originally Reported
EX_h_e	h[e] <=>	"	H+ exchange	"	1	-1000	1000	0				Originally Reported
EX_h2_e	h2[e] ->	"	H2 exchange	"	0	0	1000	0				Originally Reported
EX_h2o_e	h2o[e] <=>	"	H2O exchange	"	1	-1000	1000	0				Originally Reported
EX_k_e	k[e] <=>	"	K+ exchange	"	1	-1000	1000	0				Originally Reported
EX_lac__D_e	lac__D[e] ->	"	D-lactate exchange	"	0	0	1000	0				Originally Reported
EX_meoh_e	meoh[e] ->	"	Methanol exchange	"	0	0	1000	0				Originally Reported
EX_mg2_e	mg2[e] <=>	"	Mg exchange	"	1	-1000	1000	0				Originally Reported
EX_mn2_e	mn2[e] <=>	"	Mn2+ exchange	"	1	-1000	1000	0				Originally Reported
EX_mobd_e	mobd[e] <=>	"	Molybdate exchange	"	1	-1000	1000	0				Originally Reported
EX_nh4_e	nh4[e] <=>	"	Ammonia exchange	"	1	-1000	1000	0				Originally Reported
EX_ni2_e	ni2[e] <=>	"	Ni2+ exchange	"	1	-1000	1000	0				Originally Reported
EX_o2_e	o2[e] <=>	"	O2 exchange	"	1	-1000	1000	0				Originally Reported
EX_pi_e	pi[e] <=>	"	Phosphate exchange	"	1	-1000	1000	0				Originally Reported
EX_so4_e	so4[e] <=>	"	Sulfate exchange	"	1	-1000	1000	0				Originally Reported
EX_succ_e	succ[e] ->	"	Succinate exchange	"	0	0	1000	0				Originally Reported
EX_zn2_e	zn2[e] <=>	"	Zinc exchange	"	1	-1000	1000	0				Originally Reported
F6PA	f6p[c] <=> g3p[c] + dha[c]	ECOLC_RS15120 or ECOLC_RS21915	Fructose 6-phosphate aldolase	Glycolysis/Gluconeogenesis	1	-1000	1000	0				Originally Reported
FACOAE120	ddcacoa[c] + h2o[c] -> h[c] + ddca[c] + coa[c]	ECOLC_RS17005	Fatty-acid-CoA thioesterase (dodecanoate)	Cell Envelope Biosynthesis	0	0	1000	0				Originally Reported
FACOAE160	h2o[c] + pmtcoa[c] -> h[c] + hdca[c] + coa[c]	ECOLC_RS17005	Fatty-acid-CoA thioesterase (hexadecanoate)	Cell Envelope Biosynthesis	0	0	1000	0				Originally Reported
FACOAE161	hdcoa[c] + h2o[c] -> h[c] + hdcea[c] + coa[c]	ECOLC_RS17005	Fatty-acid-CoA thioesterase (hexadecenoate)	Cell Envelope Biosynthesis	0	0	1000	0				Originally Reported
FADRx	h[c] + nadh[c] + fad[c] -> fadh2[c] + nad[c]	ECOLC_RS22475	FAD reductase	"	0	0	1000	0				Change based on iML1515
FADRx2	h[c] + nadph[c] + fad[c] -> fadh2[c] + nadp[c]	ECOLC_RS05070 and ECOLC_RS05065	FAD reductase	"	0	0	1000	0				Added by Experimental Esentially
FBA	fdp[c] <=> dhap[c] + g3p[c]	ECOLC_RS08295 or ECOLC_RS09995 or ECOLC_RS04185	Fructose-bisphosphate aldolase	Glycolysis/Gluconeogenesis	1	-1000	1000	0				Originally Reported
FBP	fdp[c] + h2o[c] -> pi[c] + f6p[c]	ECOLC_RS22055 or ECOLC_RS20325 or ECOLC_RS04160	Fructose-bisphosphatase	Glycolysis/Gluconeogenesis	0	0	1000	0				Originally Reported
FCLT	ppp9[c] + fe2[c] -> 2 h[c] + pheme[c]	ECOLC_RS16890	Ferrochelatase	Cofactor and Prosthetic Group Biosynthesis	0	0	1000	0				Originally Reported
FE2tex	fe2[e] <=> fe2[p]	ECOLC_RS17950 or ECOLC_RS14330 or ECOLC_RS12200 or ECOLC_RS07685	Iron (II) transport via diffusion (extracellular to periplasm)	Transport, Outer Membrane Porin	1	-1000	1000	0				Originally Reported
FE2tpp	fe2[p] -> fe2[c]	ECOLC_RS03495	Iron (+2) transport in via permease (no H+)	Inorganic Ion Transport and Metabolism	0	0	1000	0				Originally Reported
FE3abcpp	atp[c] + h2o[c] + fe3[p] -> h[c] + adp[c] + pi[c] + fe3[c]	"	Iron (III) transport via ABC system (periplasm to cytoplasm)	Inorganic Ion Transport and Metabolism	0	0	1000	0				Originally Reported
FE3tex	fe3[e] <=> fe3[p]	ECOLC_RS17950 or ECOLC_RS14330 or ECOLC_RS12200 or ECOLC_RS07685	Iron (III) transport via diffusion (extracellular to periplasm)	Transport, Outer Membrane Porin	1	-1000	1000	0				Originally Reported
FHL	h[c] + for[c] -> h2[c] + co2[c]	(EcolC_3948 and (ECOLC_RS06420 and ECOLC_RS06415 and deleted and ECOLC_RS06405 and ECOLC_RS06400 and ECOLC_RS06395 and ECOLC_RS06390 and ECOLC_RS06385 and ECOLC_RS06380 and ECOLC_RS06375)) or (EcolC_3948 and (ECOLC_RS05295 and ECOLC_RS05290 and ECOLC_RS05	Formate-hydrogen lyase	Pyruvate Metabolism	0	0	1000	0				Originally Reported
FLDR2	2 flxso[c] + nadph[c] -> h[c] + 2 flxr[c] + nadp[c]	(ECOLC_RS15970 and ECOLC_RS22060) or (ECOLC_RS04330 and ECOLC_RS22060)	Flavodoxin reductase (NADPH)	Unassigned	0	0	1000	0				Originally Reported
FLVR	h[c] + ribflv[c] + nadph[c] -> nadp[c] + rbflvrd[c]	ECOLC_RS22475 or (ECOLC_RS05070 and ECOLC_RS05065)	Flavin reductase	"	0	0	1000	0				Added by Experimental Esentially
FMNAT	h[c] + atp[c] + fmn[c] -> ppi[c] + fad[c]	ECOLC_RS19490	FMN adenylyltransferase	Cofactor and Prosthetic Group Biosynthesis	0	0	1000	0				Originally Reported
FMNRx2	h[c] + fmn[c] + nadph[c] -> nadp[c] + fmnh2[c]	ECOLC_RS22475 or ECOLC_RS14290 or (ECOLC_RS05070 and ECOLC_RS05065)	FMN reductase	"	0	0	1000	0				Added by Experimental Esentially
FORtex	for[e] <=> for[p]	ECOLC_RS17950 or ECOLC_RS14330 or ECOLC_RS12200 or ECOLC_RS07685	Formate transport via diffusion (extracellular to periplasm)	Transport, Outer Membrane Porin	1	-1000	1000	0				Originally Reported
FORtppi	for[c] -> for[p]	ECOLC_RS14460 or ECOLC_RS06365	Formate transport via diffusion (cytoplasm to periplasm)	Transport, Inner Membrane	0	0	1000	0				Originally Reported
FRD2	fum[c] + mql8[c] -> succ[c] + mqn8[c]	ECOLC_RS20755 and ECOLC_RS20750 and ECOLC_RS20745 and ECOLC_RS20740	Fumarate reductase	Citric Acid Cycle	0	0	1000	0				Originally Reported
FRD3	2dmmql8[c] + fum[c] -> 2dmmq8[c] + succ[c]	ECOLC_RS20755 and ECOLC_RS20750 and ECOLC_RS20745 and ECOLC_RS20740	Fumarate reductase	Citric Acid Cycle	0	0	1000	0				Originally Reported
FRUpts2pp	pep[c] + fru[p] -> f6p[c] + pyr[c]	"	Fructose transport via PEP:Pyr PTS (f6p generating) (periplasm)	"	0	0	1000	0				Added by Experimental Esentially
FRUptspp	pep[c] + fru[p] -> f1p[c] + pyr[c]	ECOLC_RS07930 and ECOLC_RS07920 and ECOLC_RS06770 and ECOLC_RS06765	D-fructose transport via PEP:Pyr PTS (periplasm)	"	0	0	1000	0				Added by Experimental Esentially
FTHFLi	atp[c] + thf[c] + for[c] -> 10fthf[c] + adp[c] + pi[c]	"	Formate-tetrahydrofolate ligase	Folate Metabolism	0	0	1000	0				Originally Reported
FUM	fum[c] + h2o[c] <=> mal__L[c]	ECOLC_RS10840 or ECOLC_RS21005 or ECOLC_RS10845	Fumarase	Citric Acid Cycle	1	-1000	1000	0				Originally Reported
FUMt2_2pp	fum[p] + 2 h[p] -> 2 h[c] + fum[c]	ECOLC_RS00990	Fumarate transport via proton symport (2 H) (periplasm)	Transport, Inner Membrane	0	0	1000	0				Originally Reported
FUMt2_3pp	fum[p] + 3 h[p] -> 2 h[c] + fum[c]	ECOLC_RS20830 or ECOLC_RS21000 or ECOLC_RS16275	Fumarate transport via proton symport (3 H) (periplasm)	Transport, Inner Membrane	0	0	1000	0				Originally Reported
FUMtex	fum[e] <=> fum[p]	ECOLC_RS17950 or ECOLC_RS14330 or ECOLC_RS12200 or ECOLC_RS07685	Fumarate transport via diffusion (extracellular to periplasm)	Transport, Outer Membrane Porin	1	-1000	1000	0				Originally Reported
G1PACT	gam1p[c] + accoa[c] -> h[c] + acgam1p[c] + coa[c]	ECOLC_RS23030	Glucosamine-1-phosphate N-acetyltransferase	Cell Envelope Biosynthesis	0	0	1000	0				Originally Reported
G1SAT	glu1sa[c] <=> 5aop[c]	ECOLC_RS18830	Glutamate-1-semialdehyde aminotransferase	Cofactor and Prosthetic Group Biosynthesis	1	-1000	1000	0				Originally Reported
G3PD2	glyc3p[c] + nadp[c] <=> h[c] + dhap[c] + nadph[c]	ECOLC_RS00530	Glycerol-3-phosphate dehydrogenase (NADP)	Alternate Carbon Metabolism	1	-1000	1000	0				Originally Reported
G3PD5	glyc3p[c] + q8[c] -> dhap[c] + q8h2[c]	(ECOLC_RS07550 and ECOLC_RS07545 and ECOLC_RS07540) or ECOLC_RS01540	Glycerol-3-phosphate dehydrogenase (ubiquinone-8)	Oxidative Phosphorylation	0	0	1000	0				Experimental Esentially/Originally Reported
G5SADs	glu5sa[c] -> h[c] + 1pyr5c[c] + h2o[c]	s0001	L-glutamate 5-semialdehyde dehydratase (spontaneous)	Arginine and Proline Metabolism	0	0	1000	0				Originally Reported
G5SD	h[c] + nadph[c] + glu5p[c] -> pi[c] + nadp[c] + glu5sa[c]	ECOLC_RS17940	Glutamate-5-semialdehyde dehydrogenase	Arginine and Proline Metabolism	0	0	1000	0				Experimental Esentially/Originally Reported
G6PDH2r	nadp[c] + g6p[c] <=> h[c] + 6pgl[c] + nadph[c]	ECOLC_RS09555	Glucose 6-phosphate dehydrogenase	Pentose Phosphate Pathway	1	-1000	1000	0				Originally Reported
GALTptspp	pep[c] + galt[p] -> galt1p[c] + pyr[c]	ECOLC_RS08310 and ECOLC_RS08315 and ECOLC_RS08320 and ECOLC_RS06770 and ECOLC_RS06765	Galactitol transport via PEP:Pyr PTS (periplasm)	"	0	0	1000	0				Added by Experimental Esentially
GAMptspp	pep[c] + gam[p] -> gam6p[c] + pyr[c]	"	D-glucosamine transport via PEP:Pyr PTS (periplasm)	"	0	0	1000	0				Added by Experimental Esentially
GAPD	nad[c] + g3p[c] + pi[c] <=> 13dpg[c] + h[c] + nadh[c]	ECOLC_RS09965	Glyceraldehyde-3-phosphate dehydrogenase	Glycolysis/Gluconeogenesis	1	-1000	1000	0				Originally Reported
GARFT	10fthf[c] + gar[c] <=> h[c] + thf[c] + fgam[c]	ECOLC_RS06325	Phosphoribosylglycinamide formyltransferase	Purine and Pyrimidine Biosynthesis	1	-1000	1000	0				Originally Reported
GCALDD	nad[c] + h2o[c] + gcald[c] -> 2 h[c] + glyclt[c] + nadh[c]	ECOLC_RS12015	Glycolaldehyde dehydrogenase	Folate Metabolism	0	0	1000	0				Originally Reported
GF6PTA	gln__L[c] + f6p[c] -> glu__L[c] + gam6p[c]	ECOLC_RS23035	Glutamine-fructose-6-phosphate transaminase	Cell Envelope Biosynthesis	0	0	1000	0				Originally Reported
GHMT2r	ser__L[c] + thf[c] <=> mlthf[c] + h2o[c] + gly[c]	ECOLC_RS06065	Glycine hydroxymethyltransferase, reversible	Glycine and Serine Metabolism	1	-1000	1000	0				Experimental Esentially/Originally Reported
GK1	atp[c] + gmp[c] <=> adp[c] + gdp[c]	ECOLC_RS00345	Guanylate kinase (GMP:ATP)	Nucleotide Salvage Pathway	1	-1000	1000	0				Originally Reported
GLCptspp	pep[c] + glc__D[p] -> g6p[c] + pyr[c]	(ECOLC_RS06760 and ECOLC_RS00105 and ECOLC_RS06770 and ECOLC_RS06765) or (ECOLC_RS06760 and ECOLC_RS13415 and ECOLC_RS06770 and ECOLC_RS06765) or (deleted and ECOLC_RS09750 and ECOLC_RS09745 and ECOLC_RS06770 and ECOLC_RS06765)	D-glucose transport via PEP:Pyr PTS (periplasm)	Transport, Inner Membrane	0	0	1000	0				Experimental Esentially/Originally Reported
GLCt2pp	h[p] + glc__D[p] -> h[c] + glc__D[c]	ECOLC_RS04100	D-glucose transport in via proton symport (periplasm)	Transport, Inner Membrane	0	0	1000	0				Originally Reported
GLCtex	glc__D[e] <=> glc__D[p]	"	Glucose transport via diffusion (extracellular to periplasm)	Transport, Outer Membrane	1	-1000	1000	0				Originally Reported
GLNS	nh4[c] + atp[c] + glu__L[c] -> h[c] + adp[c] + pi[c] + gln__L[c]	ECOLC_RS22340 or ECOLC_RS12465	Glutamine synthetase	Glutamate Metabolism	0	0	1000	0				Experimental Esentially/Originally Reported
GLU5K	atp[c] + glu__L[c] -> adp[c] + glu5p[c]	ECOLC_RS17945	Glutamate 5-kinase	Arginine and Proline Metabolism	0	0	1000	0				Experimental Esentially/Originally Reported
GLUDy	nadp[c] + glu__L[c] + h2o[c] <=> h[c] + akg[c] + nh4[c] + nadph[c]	ECOLC_RS10065	Glutamate dehydrogenase (NADP)	Glutamate Metabolism	1	-1000	1000	0				Originally Reported
GLUPRT	gln__L[c] + h2o[c] + prpp[c] -> ppi[c] + glu__L[c] + pram[c]	ECOLC_RS07200	Glutamine phosphoribosyldiphosphate amidotransferase	Purine and Pyrimidine Biosynthesis	0	0	1000	0				Experimental Esentially/Originally Reported
GLUR	glu__D[c] <=> glu__L[c]	ECOLC_RS21815	Glutamate racemase	Cell Envelope Biosynthesis	1	-1000	1000	0				Originally Reported
GLUTRR	h[c] + glutrna[c] + nadph[c] -> glu1sa[c] + nadp[c] + trnaglu[c]	ECOLC_RS12955	Glutamyl-tRNA reductase	Cofactor and Prosthetic Group Biosynthesis	0	0	1000	0				Originally Reported
GLUTRS	atp[c] + glu__L[c] + trnaglu[c] -> glutrna[c] + ppi[c] + amp[c]	ECOLC_RS06835	Glutamyl-tRNA synthetase	Cofactor and Prosthetic Group Biosynthesis	0	0	1000	0				Originally Reported
GLXCL	h[c] + 2 glx[c] -> 2h3oppan[c] + co2[c]	ECOLC_RS16760	Glyoxalate carboligase	Glyoxylate Metabolism	0	0	1000	0				Originally Reported
GLYCDx	nad[c] + glyc[c] -> h[c] + dha[c] + nadh[c]	ECOLC_RS21920	Glycerol dehydrogenase	Alternate Carbon Metabolism	0	0	1000	0				Originally Reported
GLYCK	atp[c] + glyc__R[c] -> h[c] + 3pg[c] + adp[c]	ECOLC_RS16730	Glycerate kinase	Glyoxylate Metabolism	0	0	1000	0				Originally Reported
GLYCL	nad[c] + thf[c] + gly[c] -> nh4[c] + mlthf[c] + nadh[c] + co2[c]	ECOLC_RS04285 and ECOLC_RS04290 and ECOLC_RS04280 and ECOLC_RS19025	Glycine Cleavage System	Folate Metabolism	0	0	1000	0				Originally Reported
GLYCtex	glyc[e] <=> glyc[p]	ECOLC_RS17950 or ECOLC_RS14330 or ECOLC_RS12200 or ECOLC_RS07685	Glycerol transport via diffusion (extracellular to periplasm)	Transport, Outer Membrane Porin	1	-1000	1000	0				Originally Reported
GLYCTO4	glyclt[c] + 2dmmq8[c] -> glx[c] + 2dmmql8[c]	ECOLC_RS03830 and ECOLC_RS03840 and ECOLC_RS03835	Glycolate oxidase	Alternate Carbon Metabolism	0	0	1000	0				Originally Reported
GLYCtpp	glyc[c] <=> glyc[p]	ECOLC_RS22045 or s0001	Glycerol transport via channel (periplasm)	Transport, Inner Membrane	1	-1000	1000	0				Originally Reported
GLYK	atp[c] + glyc[c] -> h[c] + glyc3p[c] + adp[c]	ECOLC_RS22050	Glycerol kinase	Alternate Carbon Metabolism	0	0	1000	0				Experimental Esentially/Originally Reported
GLYOX3	mthgxl[c] + h2o[c] -> h[c] + lac__D[c]	"	Glyoxalase III	Methylglyoxal Metabolism	0	0	1000	0				Originally Reported
GMPS	nh4[c] + atp[c] + xmp[c] -> 2 h[c] + ppi[c] + gmp[c] + amp[c]	"	GMP synthase	"	0	0	1000	0				Added by Experimental Esentially
GMPS2	atp[c] + gln__L[c] + xmp[c] + h2o[c] -> 2 h[c] + ppi[c] + glu__L[c] + gmp[c] + amp[c]	ECOLC_RS06285	GMP synthase	Purine and Pyrimidine Biosynthesis	0	0	1000	0				Experimental Esentially/Originally Reported
GND	6pgc[c] + nadp[c] -> ru5p__D[c] + nadph[c] + co2[c]	ECOLC_RS08625	Phosphogluconate dehydrogenase	Pentose Phosphate Pathway	0	0	1000	0				Originally Reported
GRTT	grdp[c] + ipdp[c] -> ppi[c] + frdp[c]	ECOLC_RS17260	Geranyltranstransferase	Cofactor and Prosthetic Group Biosynthesis	0	0	1000	0				Originally Reported
GRXR	2 gthrd[c] + grxox[c] -> grxrd[c] + gthox[c]	ECOLC_RS13600 or ECOLC_RS00520 or ECOLC_RS10620 or ECOLC_RS14755	Glutaredoxin reductase	Unassigned	0	0	1000	0				Originally Reported
GTHOr	h[c] + nadph[c] + gthox[c] <=> 2 gthrd[c] + nadp[c]	ECOLC_RS01145	Glutathione oxidoreductase	Cofactor and Prosthetic Group Biosynthesis	1	-1000	1000	0				Originally Reported
GTPCI	h2o[c] + gtp[c] -> h[c] + ahdt[c] + for[c]	ECOLC_RS08005	GTP cyclohydrolase I	Cofactor and Prosthetic Group Biosynthesis	0	0	1000	0				Originally Reported
GTPCII2	3 h2o[c] + gtp[c] -> 2 h[c] + ppi[c] + for[c] + 25drapp[c]	ECOLC_RS12580	GTP cyclohydrolase II (25drapp)	Cofactor and Prosthetic Group Biosynthesis	0	0	1000	0				Originally Reported
H2Otex	h2o[e] <=> h2o[p]	s0001 or ECOLC_RS14190 or deleted or ECOLC_RS07685 or ECOLC_RS17950 or ECOLC_RS12355 or ECOLC_RS12200 or ECOLC_RS14330	H2O transport via diffusion (extracellular to periplasm)	Transport, Outer Membrane Porin	1	-1000	1000	0				Originally Reported
H2Otpp	h2o[p] <=> h2o[c]	s0001 or ECOLC_RS14620	H2O transport via diffusion (periplasm)	Transport, Inner Membrane	1	-1000	1000	0				Originally Reported
H2tex	h2[e] <=> h2[p]	ECOLC_RS17950 or ECOLC_RS14330 or ECOLC_RS12200 or ECOLC_RS07685	Hydrogen transport via diffusion (extracellular to periplasm)	Transport, Outer Membrane Porin	1	-1000	1000	0				Originally Reported
H2tpp	h2[p] <=> h2[c]	s0001	Hydrogen transport diffusion (periplasm)	Transport, Inner Membrane	1	-1000	1000	0				Originally Reported
HACD1	h[c] + aacoa[c] + nadh[c] <=> nad[c] + 3hbcoa[c]	ECOLC_RS22465 or ECOLC_RS07060	3-hydroxyacyl-CoA dehydrogenase (acetoacetyl-CoA)	Membrane Lipid Metabolism	1	-1000	1000	0				Originally Reported
HACD2	h[c] + 3ohcoa[c] + nadh[c] <=> nad[c] + 3hhcoa[c]	ECOLC_RS22465 or ECOLC_RS07060	3-hydroxyacyl-CoA dehydrogenase (3-oxohexanoyl-CoA)	Membrane Lipid Metabolism	1	-1000	1000	0				Originally Reported
HACD3	h[c] + 3oocoa[c] + nadh[c] <=> nad[c] + 3hocoa[c]	ECOLC_RS22465 or ECOLC_RS07060	3-hydroxyacyl-CoA dehydrogenase (3-oxooctanoyl-CoA)	Membrane Lipid Metabolism	1	-1000	1000	0				Originally Reported
HACD4	h[c] + 3odcoa[c] + nadh[c] <=> nad[c] + 3hdcoa[c]	ECOLC_RS22465 or ECOLC_RS07060	3-hydroxyacyl-CoA dehydrogenase (3-oxodecanoyl-CoA)	Membrane Lipid Metabolism	1	-1000	1000	0				Originally Reported
HACD5	h[c] + 3oddcoa[c] + nadh[c] <=> nad[c] + 3hddcoa[c]	ECOLC_RS22465 or ECOLC_RS07060	3-hydroxyacyl-CoA dehydrogenase (3-oxododecanoyl-CoA)	Membrane Lipid Metabolism	1	-1000	1000	0				Originally Reported
HACD6	h[c] + 3otdcoa[c] + nadh[c] <=> nad[c] + 3htdcoa[c]	ECOLC_RS22465 or ECOLC_RS07060	3-hydroxyacyl-CoA dehydrogenase (3-oxotetradecanoyl-CoA)	Membrane Lipid Metabolism	1	-1000	1000	0				Originally Reported
HACD7	h[c] + 3ohdcoa[c] + nadh[c] <=> nad[c] + 3hhdcoa[c]	ECOLC_RS22465 or ECOLC_RS07060	3-hydroxyacyl-CoA dehydrogenase (3-oxohexadecanoyl-CoA)	Membrane Lipid Metabolism	1	-1000	1000	0				Originally Reported
HBZOPT	4hbz[c] + octdp[c] -> ppi[c] + 3ophb[c]	ECOLC_RS21435	Hydroxybenzoate octaprenyltransferase	Cofactor and Prosthetic Group Biosynthesis	0	0	1000	0				Originally Reported
HCO3E	h2o[c] + co2[c] <=> h[c] + hco3[c]	ECOLC_RS18975 or ECOLC_RS17650	HCO3 equilibration reaction	Unassigned	1	-1000	1000	0				Originally Reported
HEX1	atp[c] + glc__D[c] -> h[c] + adp[c] + g6p[c]	ECOLC_RS06895	Hexokinase (D-glucose:ATP)	Glycolysis/Gluconeogenesis	0	0	1000	0				Originally Reported
HISTD	2 nad[c] + h2o[c] + histd[c] -> 3 h[c] + his__L[c] + 2 nadh[c]	ECOLC_RS08670	Histidinol dehydrogenase	Histidine Metabolism	0	0	1000	0				Experimental Esentially/Originally Reported
HISTP	hisp[c] + h2o[c] -> pi[c] + histd[c]	ECOLC_RS08660	Histidinol-phosphatase	Histidine Metabolism	0	0	1000	0				Experimental Esentially/Originally Reported
HMBS	h2o[c] + 4 ppbng[c] -> 4 nh4[c] + hmbil[c]	ECOLC_RS22660	Hydroxymethylbilane synthase	Cofactor and Prosthetic Group Biosynthesis	0	0	1000	0				Originally Reported
HPPK2	atp[c] + 6hmhpt[c] -> h[c] + 6hmhptpp[c] + amp[c]	ECOLC_RS18895	6-hydroxymethyl-dihydropterin pyrophosphokinase	Cofactor and Prosthetic Group Biosynthesis	0	0	1000	0				Originally Reported
HSDy	hom__L[c] + nadp[c] <=> h[c] + aspsa[c] + nadph[c]	ECOLC_RS21955 or ECOLC_RS19615	Homoserine dehydrogenase (NADPH)	Threonine and Lysine Metabolism	1	-1000	1000	0				Experimental Esentially/Originally Reported
HSK	hom__L[c] + atp[c] -> h[c] + adp[c] + phom[c]	ECOLC_RS19610	Homoserine kinase	Threonine and Lysine Metabolism	0	0	1000	0				Experimental Esentially/Originally Reported
HSST	hom__L[c] + succoa[c] -> suchms[c] + coa[c]	ECOLC_RS21590	Homoserine O-succinyltransferase	Methionine Metabolism	0	0	1000	0				Experimental Esentially/Originally Reported
HSTPT	glu__L[c] + imacp[c] -> akg[c] + hisp[c]	ECOLC_RS08665	Histidinol-phosphate transaminase	Histidine Metabolism	0	0	1000	0				Experimental Esentially/Originally Reported
Htex	h[e] <=> h[p]	ECOLC_RS14330 or ECOLC_RS12200 or ECOLC_RS07685 or ECOLC_RS17950	Proton transport via diffusion (extracellular to periplasm)	Transport, Outer Membrane Porin	1	-1000	1000	0				Originally Reported
I2FE2SR	iscssh[c] + 2fe1s[c] + iscu[c] -> 4 h[c] + iscu_2fe2s[c] + iscs[c]	ECOLC_RS06170 and ECOLC_RS06175	ISC [2Fe-2S] regeneration	Cofactor and Prosthetic Group Biosynthesis	0	0	1000	0				Experimental Esentially/Originally Reported
I2FE2SS	2 iscssh[c] + fadh2[c] + 2 fe2[c] + iscu[c] -> 6 h[c] + iscu_2fe2s[c] + 2 iscs[c] + fad[c]	ECOLC_RS22650 and ECOLC_RS06170 and ECOLC_RS06175	ISC [2Fe-2S] Synthesis	Cofactor and Prosthetic Group Biosynthesis	0	0	1000	0				Experimental Esentially/Originally Reported
I2FE2SS2	2 iscssh[c] + iscu_2fe2s[c] + fadh2[c] + 2 fe2[c] -> 6 h[c] + iscu_2fe2s2[c] + 2 iscs[c] + fad[c]	ECOLC_RS22650 and ECOLC_RS06170 and ECOLC_RS06175	ISC [2Fe-2S] Synthesis II	Cofactor and Prosthetic Group Biosynthesis	0	0	1000	0				Experimental Esentially/Originally Reported
I2FE2ST	4 h[c] + iscu_2fe2s[c] -> 2fe2s[c] + iscu[c]	ECOLC_RS06180 and ECOLC_RS06175	ISC [2Fe-2S] Transfer	Cofactor and Prosthetic Group Biosynthesis	0	0	1000	0				Experimental Esentially/Originally Reported
I4FE4SR	2 h[c] + fadh2[c] + iscu_2fe2s2[c] -> iscu_4fe4s[c] + fad[c]	ECOLC_RS06175	ISC [4Fe-4S] Reduction	Cofactor and Prosthetic Group Biosynthesis	0	0	1000	0				Experimental Esentially/Originally Reported
I4FE4ST	4 h[c] + iscu_4fe4s[c] -> iscu[c] + 4fe4s[c]	ECOLC_RS06180 and ECOLC_RS06175	ISC [4Fe-4S] Transfer	Cofactor and Prosthetic Group Biosynthesis	0	0	1000	0				Experimental Esentially/Originally Reported
ICDHyr	nadp[c] + icit[c] <=> akg[c] + nadph[c] + co2[c]	ECOLC_RS13245	Isocitrate dehydrogenase (NADP)	Citric Acid Cycle	1	-1000	1000	0				Experimental Esentially/Originally Reported
ICL	icit[c] -> glx[c] + succ[c]	ECOLC_RS21580	Isocitrate lyase	Anaplerotic Reactions	0	0	1000	0				Originally Reported
ICYSDS	cys__L[c] + iscs[c] -> iscssh[c] + ala__L[c]	ECOLC_RS06170	ISC Cysteine desulfuration	Cofactor and Prosthetic Group Biosynthesis	0	0	1000	0				Originally Reported
IG3PS	gln__L[c] + prlp[c] -> h[c] + aicar[c] + eig3p[c] + glu__L[c]	ECOLC_RS08655 and ECOLC_RS08645	Imidazole-glycerol-3-phosphate synthase	Histidine Metabolism	0	0	1000	0				Experimental Esentially/Originally Reported
IGPDH	eig3p[c] -> h2o[c] + imacp[c]	ECOLC_RS08660	Imidazoleglycerol-phosphate dehydratase	Histidine Metabolism	0	0	1000	0				Experimental Esentially/Originally Reported
IGPS	h[c] + 2cpr5p[c] -> 3ig3p[c] + h2o[c] + co2[c]	ECOLC_RS12675	Indole-3-glycerol-phosphate synthase	Tyrosine, Tryptophan, and Phenylalanine Metabolism	0	0	1000	0				Experimental Esentially/Originally Reported
ILETA	akg[c] + ile__L[c] <=> glu__L[c] + 3mop[c]	ECOLC_RS22840	Isoleucine transaminase	Valine, Leucine, and Isoleucine Metabolism	1	-1000	1000	0				Originally Reported
IMPC	imp[c] + h2o[c] <=> fprica[c]	ECOLC_RS21620	IMP cyclohydrolase	Purine and Pyrimidine Biosynthesis	1	-1000	1000	0				Experimental Esentially/Originally Reported
IMPD	nad[c] + imp[c] + h2o[c] -> h[c] + xmp[c] + nadh[c]	ECOLC_RS06280	IMP dehydrogenase	Purine and Pyrimidine Biosynthesis	0	0	1000	0				Experimental Esentially/Originally Reported
IPDDI	ipdp[c] <=> dmpp[c]	ECOLC_RS04360	Isopentenyl-diphosphate D-isomerase	Cofactor and Prosthetic Group Biosynthesis	1	-1000	1000	0				Originally Reported
IPDPS	h[c] + h2mb4p[c] + nadh[c] -> nad[c] + h2o[c] + ipdp[c]	ECOLC_RS19470	1-hydroxy-2-methyl-2-(E)-butenyl 4-diphosphate reductase (ipdp)	Cofactor and Prosthetic Group Biosynthesis	0	0	1000	0				Originally Reported
IPMD	nad[c] + 3c2hmp[c] -> h[c] + 3c4mop[c] + nadh[c]	ECOLC_RS19240	3-isopropylmalate dehydrogenase	Valine, Leucine, and Isoleucine Metabolism	0	0	1000	0				Experimental Esentially/Originally Reported
IPPMIa	3c2hmp[c] <=> h2o[c] + 2ippm[c]	ECOLC_RS19250 and ECOLC_RS19245	3-isopropylmalate dehydratase	Valine, Leucine, and Isoleucine Metabolism	1	-1000	1000	0				Experimental Esentially/Originally Reported
IPPMIb	h2o[c] + 2ippm[c] <=> 3c3hmp[c]	ECOLC_RS19250 and ECOLC_RS19245	2-isopropylmalate hydratase	Valine, Leucine, and Isoleucine Metabolism	1	-1000	1000	0				Experimental Esentially/Originally Reported
IPPS	accoa[c] + 3mob[c] + h2o[c] -> h[c] + 3c3hmp[c] + coa[c]	ECOLC_RS19235	2-isopropylmalate synthase	Valine, Leucine, and Isoleucine Metabolism	0	0	1000	0				Experimental Esentially/Originally Reported
K2L4Aabcpp	atp[c] + h2o[c] + kdo2lipid4[c] -> h[c] + adp[c] + pi[c] + kdo2lipid4[p]	ECOLC_RS14410	KDO(2)-lipid IV A transport via ABC system (periplasm)	Transport, Inner Membrane	0	0	1000	0				Originally Reported
K2L4Aabctex	atp[c] + kdo2lipid4[p] + h2o[c] -> h[c] + adp[c] + pi[c] + kdo2lipid4[e]	ECOLC_RS02660 and ECOLC_RS02655 and ECOLC_RS02665 and ECOLC_RS20180 and ECOLC_RS20175	KDO(2)-lipid IV A transport via ABC system (periplasm to extracellular)	Lipopolysaccharide Biosynthesis / Recycling	0	0	1000	0				Originally Reported
KARA1	23dhmb[c] + nadp[c] <=> h[c] + alac__S[c] + nadph[c]	ECOLC_RS22820	Ketol-acid reductoisomerase (2,3-dihydroxy-3-methylbutanoate)	Valine, Leucine, and Isoleucine Metabolism	1	-1000	1000	0				Experimental Esentially/Originally Reported
KARA2	h[c] + 2ahbut[c] + nadph[c] <=> nadp[c] + 23dhmp[c]	ECOLC_RS22820	Ketol-acid reductoisomerase (2-Acetolactate)	Valine, Leucine, and Isoleucine Metabolism	1	-1000	1000	0				Experimental Esentially/Originally Reported
KDOCT2	ctp[c] + kdo[c] -> ppi[c] + ckdo[c]	ECOLC_RS14390	3-deoxy-manno-octulosonate cytidylyltransferase	Lipopolysaccharide Biosynthesis / Recycling	0	0	1000	0				Originally Reported
KDOPP	h2o[c] + kdo8p[c] -> pi[c] + kdo[c]	ECOLC_RS02670	3-deoxy-manno-octulosonate-8-phosphatase	Lipopolysaccharide Biosynthesis / Recycling	0	0	1000	0				Originally Reported
KDOPS	pep[c] + h2o[c] + ara5p[c] -> pi[c] + kdo8p[c]	ECOLC_RS12930	3-deoxy -D-manno-octulosonic -acid 8-phosphate synthase	Lipopolysaccharide Biosynthesis / Recycling	0	0	1000	0				Originally Reported
Kt2pp	h[p] + k[p] -> h[c] + k[c]	(ECOLC_RS12500 and ECOLC_RS02230 and ECOLC_RS22450) or ECOLC_RS12735 or (ECOLC_RS12500 and ECOLC_RS02230 and deleted) or ECOLC_RS22945	Potassium transport in via proton symport (periplasm)	Inorganic Ion Transport and Metabolism	0	0	1000	0				Originally Reported
Ktex	k[e] <=> k[p]	ECOLC_RS17950 or ECOLC_RS14330 or ECOLC_RS12200 or ECOLC_RS07685	Potassium transport via diffusion (extracellular to periplasm)	Transport, Outer Membrane Porin	1	-1000	1000	0				Originally Reported
LDH_D	nad[c] + lac__D[c] <=> h[c] + pyr[c] + nadh[c]	ECOLC_RS08110 or ECOLC_RS12180	D-lactate dehydrogenase	Pyruvate Metabolism	1	-1000	1000	0				Originally Reported
LEUTAi	4mop[c] + glu__L[c] -> akg[c] + leu__L[c]	ECOLC_RS22840 or ECOLC_RS21365	Leucine transaminase (irreversible)	Valine, Leucine, and Isoleucine Metabolism	0	0	1000	0				Originally Reported
LPADSS	u23ga[c] + lipidX[c] -> h[c] + lipidAds[c] + udp[c]	ECOLC_RS18695	Lipid A disaccaride synthase	Lipopolysaccharide Biosynthesis / Recycling	0	0	1000	0				Originally Reported
MALCOAMT	amet[c] + malcoa[c] -> malcoame[c] + ahcys[c]	ECOLC_RS15375	Malonyl-CoA methyltransferase	Cofactor and Prosthetic Group Biosynthesis	0	0	1000	0				Originally Reported
MALS	accoa[c] + glx[c] + h2o[c] -> h[c] + mal__L[c] + coa[c]	ECOLC_RS21585 or ECOLC_RS03850	Malate synthase	Anaplerotic Reactions	0	0	1000	0				Originally Reported
MALTptspp	pep[c] + malt[p] -> malt6p[c] + pyr[c]	ECOLC_RS06760 and ECOLC_RS00105 and ECOLC_RS06770 and ECOLC_RS06765	Maltose transport via PEP:Pyr PTS (periplasm)	"	0	0	1000	0				Added by Experimental Esentially
MANGLYCptspp	pep[c] + manglyc[p] -> man6pglyc[c] + pyr[c]	ECOLC_RS15715 and ECOLC_RS06770 and ECOLC_RS06765	2-O-alpha-mannosyl-D-glycerate transport via PEP:Pyr PTS (periplasm)	"	0	0	1000	0				Added by Experimental Esentially
MANptspp	pep[c] + man[p] -> man6p[c] + pyr[c]	"	D-mannose transport via PEP:Pyr PTS (periplasm)	"	0	0	1000	0				Added by Experimental Esentially
MCOATA	malcoa[c] + ACP[c] <=> coa[c] + malACP[c]	ECOLC_RS13450 and ECOLC_RS13460	Malonyl-CoA-ACP transacylase	Membrane Lipid Metabolism	1	-1000	1000	0				Originally Reported
MCTP1App	murein5p5p[p] -> murein5px4p[p] + ala__D[p]	ECOLC_RS19185 or ECOLC_RS16205 or ECOLC_RS18855 or ECOLC_RS01690	Murein crosslinking transpeptidase 1A:(A2pm->D-ala) (periplasm)	Murein Biosynthesis	0	0	1000	0				Originally Reported
MDH	nad[c] + mal__L[c] <=> h[c] + oaa[c] + nadh[c]	ECOLC_RS02505	Malate dehydrogenase	Citric Acid Cycle	1	-1000	1000	0				Originally Reported
ME1	nad[c] + mal__L[c] -> pyr[c] + nadh[c] + co2[c]	ECOLC_RS11665	Malic enzyme (NAD)	Anaplerotic Reactions	0	0	1000	0				Originally Reported
ME2	mal__L[c] + nadp[c] -> nadph[c] + pyr[c] + co2[c]	ECOLC_RS06525	Malic enzyme (NADP)	Anaplerotic Reactions	0	0	1000	0				Originally Reported
MECDPDH5	h[c] + 2 flxr[c] + 2mecdp[c] -> h2o[c] + 2 flxso[c] + h2mb4p[c]	(ECOLC_RS04330 and ECOLC_RS06245) or (ECOLC_RS15970 and ECOLC_RS06245)	2C-methyl-D-erythritol 2,4 cyclodiphosphate dehydratase	Cofactor and Prosthetic Group Biosynthesis	0	0	1000	0				Originally Reported
MECDPS	2p4c2me[c] -> 2mecdp[c] + cmp[c]	ECOLC_RS05155	2-C-methyl-D-erythritol 2,4-cyclodiphosphate synthase	Cofactor and Prosthetic Group Biosynthesis	0	0	1000	0				Originally Reported
MEOHtex	meoh[e] <=> meoh[p]	ECOLC_RS12200 or ECOLC_RS14330 or ECOLC_RS07685 or ECOLC_RS17950	Methanol transport via diffusion (extracellular to periplasm)	Transport, Outer Membrane Porin	1	-1000	1000	0				Originally Reported
MEOHtrpp	meoh[p] <=> meoh[c]	s0001	Methanol reversible transport via diffusion (periplasm)	Transport, Inner Membrane	1	-1000	1000	0				Originally Reported
MEPCT	h[c] + ctp[c] + 2me4p[c] -> 4c2me[c] + ppi[c]	ECOLC_RS05150	2-C-methyl-D-erythritol 4-phosphate cytidylyltransferase	Cofactor and Prosthetic Group Biosynthesis	0	0	1000	0				Originally Reported
METAT	met__L[c] + atp[c] + h2o[c] -> amet[c] + pi[c] + ppi[c]	ECOLC_RS04105	Methionine adenosyltransferase	Methionine Metabolism	0	0	1000	0				Originally Reported
METS	5mthf[c] + hcys__L[c] -> h[c] + met__L[c] + thf[c]	ECOLC_RS21560 or ECOLC_RS22540	Methionine synthase	Methionine Metabolism	0	0	1000	0				Originally Reported
MG2t3_2pp	2 h[c] + mg2[p] <=> 2 h[p] + mg2[c]	"	Magnesium (Mg+2) transport in/out via proton antiport (periplasm)	Inorganic Ion Transport and Metabolism	1	-1000	1000	0				Originally Reported
MG2tex	mg2[e] <=> mg2[p]	ECOLC_RS17950 or ECOLC_RS14330 or ECOLC_RS12200 or ECOLC_RS07685	Magnesium (Mg+2) transport via diffusion (extracellular to periplasm)	Transport, Outer Membrane Porin	1	-1000	1000	0				Originally Reported
MGSA	dhap[c] -> pi[c] + mthgxl[c]	ECOLC_RS14155	Methylglyoxal synthase	Methylglyoxal Metabolism	0	0	1000	0				Originally Reported
MN2tpp	mn2[p] -> mn2[c]	ECOLC_RS03495	Manganese transport in via permease (no H+)	Inorganic Ion Transport and Metabolism	0	0	1000	0				Originally Reported
MNLptspp	pep[c] + mnl[p] -> mnl1p[c] + pyr[c]	ECOLC_RS00590 and ECOLC_RS06770 and ECOLC_RS06765	Mannitol transport via PEP:Pyr PTS (periplasm)	"	0	0	1000	0				Added by Experimental Esentially
MNtex	mn2[e] <=> mn2[p]	ECOLC_RS17950 or ECOLC_RS14330 or ECOLC_RS12200 or ECOLC_RS07685	Manganese (Mn+2) transport via diffusion (extracellular to periplasm)	Transport, Outer Membrane Porin	1	-1000	1000	0				Originally Reported
MOADSUx	iscssh[c] + moadamp[c] + nadh[c] -> nad[c] + moadcosh[c] + iscs[c] + amp[c]	ECOLC_RS06170 and ECOLC_RS15335	MoaD sulfuration (nadh, assumed)	Cofactor and Prosthetic Group Biosynthesis	0	0	1000	0				Originally Reported
MOAT	ckdo[c] + lipidA[c] -> h[c] + cmp[c] + kdolipid4[c]	ECOLC_RS00420	3-deoxy-D-manno-octulosonic acid transferase	Lipopolysaccharide Biosynthesis / Recycling	0	0	1000	0				Originally Reported
MOAT2	ckdo[c] + kdolipid4[c] -> h[c] + cmp[c] + kdo2lipid4[c]	ECOLC_RS00420	3-deoxy-D-manno-octulosonic acid transferase	Lipopolysaccharide Biosynthesis / Recycling	0	0	1000	0				Originally Reported
MOBDabcpp	atp[c] + mobd[p] + h2o[c] -> h[c] + adp[c] + pi[c] + mobd[c]	(ECOLC_RS15540 and ECOLC_RS15525 and ECOLC_RS15530) or (ECOLC_RS06740 and ECOLC_RS06730 and ECOLC_RS06735 and ECOLC_RS22095) or (ECOLC_RS06740 and ECOLC_RS06725 and ECOLC_RS06730 and ECOLC_RS06735)	Molybdate transport via ABC system (periplasm)	Inorganic Ion Transport and Metabolism	0	0	1000	0				Experimental Esentially/Originally Reported
MOBDtex	mobd[e] <=> mobd[p]	ECOLC_RS17950 or ECOLC_RS14330 or ECOLC_RS12200 or ECOLC_RS07685	Molybdate transport via diffusion (extracellular to periplasm)	Transport, Outer Membrane Porin	1	-1000	1000	0				Originally Reported
MOCOS	2 h[c] + mptamp[c] + mobd[c] -> h2o[c] + cu2[c] + moco[c] + amp[c]	ECOLC_RS15110	Molybdenum cofactor synthase	Cofactor and Prosthetic Group Biosynthesis	0	0	1000	0				Originally Reported
MOHMT	3mob[c] + mlthf[c] + h2o[c] -> thf[c] + 2dhp[c]	ECOLC_RS18935	3-methyl-2-oxobutanoate hydroxymethyltransferase	Cofactor and Prosthetic Group Biosynthesis	0	0	1000	0				Experimental Esentially/Originally Reported
MPTAT	h[c] + mpt[c] + atp[c] -> mptamp[c] + ppi[c]	ECOLC_RS19575	Molybdopterin adenylyltransferase	Cofactor and Prosthetic Group Biosynthesis	0	0	1000	0				Originally Reported
MPTG	2 uaagmda[c] -> 2 h[c] + murein5p5p[p] + 2 udcpdp[c]	(ECOLC_RS01690 and ECOLC_RS13575) or (ECOLC_RS18855 and ECOLC_RS13575) or (ECOLC_RS13575 and ECOLC_RS06225)	Murein polymerizing transglycosylase	Murein Biosynthesis	0	0	1000	0				Originally Reported
MPTS	cpmp[c] + cu2[c] + 2 moadcosh[c] -> 5 h[c] + mpt[c] + 2 moadcoo[c]	ECOLC_RS15335 and ECOLC_RS15330	Molybdopterin synthase	Cofactor and Prosthetic Group Biosynthesis	0	0	1000	0				Originally Reported
MPTSS	h[c] + atp[c] + moadcoo[c] -> moadamp[c] + ppi[c]	ECOLC_RS15115	Molybdopterin synthase sulfurylase	Cofactor and Prosthetic Group Biosynthesis	0	0	1000	0				Originally Reported
MTHFC	h2o[c] + methf[c] <=> h[c] + 10fthf[c]	ECOLC_RS16645	Methenyltetrahydrofolate cyclohydrolase	Folate Metabolism	1	-1000	1000	0				Originally Reported
MTHFD	nadp[c] + mlthf[c] <=> methf[c] + nadph[c]	ECOLC_RS16645	Methylenetetrahydrofolate dehydrogenase (NADP)	Folate Metabolism	1	-1000	1000	0				Originally Reported
MTHFR2	2 h[c] + mlthf[c] + nadh[c] -> nad[c] + 5mthf[c]	ECOLC_RS21945	5,10-methylenetetrahydrofolate reductase (NADH)	Folate Metabolism	0	0	1000	0				Experimental Esentially/Originally Reported
MTHTHFSs	mdhdhf[c] + h2o[c] -> mththf[c]	s0001	(2R,4S)-2-methyl-2,3,3,4-tetrahydroxytetrahydrofuran synthesis (spontaneous)	Methionine Metabolism	0	0	1000	0				Originally Reported
NADH16pp	4 h[c] + q8[c] + nadh[c] -> 3 h[p] + nad[c] + q8h2[c]	ECOLC_RS07385 and ECOLC_RS07380 and ECOLC_RS07375 and ECOLC_RS07370 and ECOLC_RS07365 and ECOLC_RS07360 and ECOLC_RS07355 and ECOLC_RS07350 and ECOLC_RS07345 and ECOLC_RS07340 and ECOLC_RS07335 and ECOLC_RS07330 and ECOLC_RS07325	NADH dehydrogenase (ubiquinone-8 & 3 protons) (periplasm)	Oxidative Phosphorylation	0	0	1000	0				Originally Reported
NADH17pp	4 h[c] + mqn8[c] + nadh[c] -> 3 h[p] + nad[c] + mql8[c]	ECOLC_RS07385 and ECOLC_RS07380 and ECOLC_RS07375 and ECOLC_RS07370 and ECOLC_RS07365 and ECOLC_RS07360 and ECOLC_RS07355 and ECOLC_RS07350 and ECOLC_RS07345 and ECOLC_RS07340 and ECOLC_RS07335 and ECOLC_RS07330 and ECOLC_RS07325	NADH dehydrogenase (menaquinone-8 & 3 protons) (periplasm)	Oxidative Phosphorylation	0	0	1000	0				Originally Reported
NADK	nad[c] + atp[c] -> h[c] + adp[c] + nadp[c]	ECOLC_RS05720	NAD kinase	Cofactor and Prosthetic Group Biosynthesis	0	0	1000	0				Originally Reported
NADS1	nh4[c] + atp[c] + dnad[c] -> h[c] + nad[c] + ppi[c] + amp[c]	ECOLC_RS10175	NAD synthase (nh3)	Cofactor and Prosthetic Group Biosynthesis	0	0	1000	0				Originally Reported
NADTRHD	nad[c] + nadph[c] -> nadp[c] + nadh[c]	ECOLC_RS21840 or (ECOLC_RS10890 and ECOLC_RS10885)	NAD transhydrogenase	Oxidative Phosphorylation	0	0	1000	0				Originally Reported
NDPK1	atp[c] + gdp[c] <=> adp[c] + gtp[c]	ECOLC_RS16895 or ECOLC_RS06230	Nucleoside-diphosphate kinase (ATP:GDP)	Nucleotide Salvage Pathway	1	-1000	1000	0				Originally Reported
NDPK2	atp[c] + udp[c] <=> adp[c] + utp[c]	ECOLC_RS16895 or ECOLC_RS06230	Nucleoside-diphosphate kinase (ATP:UDP)	Nucleotide Salvage Pathway	1	-1000	1000	0				Originally Reported
NDPK3	atp[c] + cdp[c] <=> ctp[c] + adp[c]	ECOLC_RS06230 or ECOLC_RS16895	Nucleoside-diphosphate kinase (ATP:CDP)	Nucleotide Salvage Pathway	1	-1000	1000	0				Originally Reported
NDPK4	atp[c] + dtdp[c] <=> adp[c] + dttp[c]	ECOLC_RS16895 or ECOLC_RS06230	Nucleoside-diphosphate kinase (ATP:dTDP)	Nucleotide Salvage Pathway	1	-1000	1000	0				Originally Reported
NDPK8	dadp[c] + atp[c] <=> adp[c] + datp[c]	ECOLC_RS16895 or ECOLC_RS06230	Nucleoside-diphosphate kinase (ATP:dADP)	Nucleotide Salvage Pathway	1	-1000	1000	0				Originally Reported
NH4tex	nh4[e] <=> nh4[p]	ECOLC_RS17950 or ECOLC_RS14330 or ECOLC_RS12200 or ECOLC_RS07685	Ammonia transport via diffusion (extracellular to periplasm)	Transport, Outer Membrane Porin	1	-1000	1000	0				Originally Reported
NH4tpp	nh4[p] <=> nh4[c]	ECOLC_RS17010 or s0001	Ammonia reversible transport (periplasm)	Inorganic Ion Transport and Metabolism	1	-1000	1000	0				Originally Reported
NI2tex	ni2[e] <=> ni2[p]	ECOLC_RS17950 or ECOLC_RS14330 or ECOLC_RS12200 or ECOLC_RS07685	Nickel transport via diffusion (extracellular to periplasm)	Transport, Outer Membrane Porin	1	-1000	1000	0				Originally Reported
NI2tpp	ni2[p] -> ni2[c]	ECOLC_RS22605	Nickel (+2) transport in via permease (no H+)	Inorganic Ion Transport and Metabolism	0	0	1000	0				Originally Reported
NNATr	h[c] + atp[c] + nicrnt[c] <=> ppi[c] + dnad[c]	ECOLC_RS16185	Nicotinate-nucleotide adenylyltransferase	Nucleotide Salvage Pathway	1	-1000	1000	0				Originally Reported
NNDPR	2 h[c] + quln[c] + prpp[c] -> ppi[c] + nicrnt[c] + co2[c]	ECOLC_RS19060	Nicotinate-nucleotide diphosphorylase (carboxylating)	Cofactor and Prosthetic Group Biosynthesis	0	0	1000	0				Experimental Esentially/Originally Reported
NTD2	ump[c] + h2o[c] -> pi[c] + uri[c]	ECOLC_RS05165 or ECOLC_RS19785	5-nucleotidase (UMP)	Nucleotide Salvage Pathway	0	0	1000	0				Originally Reported
NTD6	h2o[c] + damp[c] -> pi[c] + dad_2[c]	ECOLC_RS07310 or ECOLC_RS05165	5-nucleotidase (dAMP)	Nucleotide Salvage Pathway	0	0	1000	0				Originally Reported
O2tex	o2[e] <=> o2[p]	ECOLC_RS17950 or ECOLC_RS14330 or ECOLC_RS12200 or ECOLC_RS07685	Oxygen transport via diffusion (extracellular to periplasm)	Transport, Outer Membrane Porin	1	-1000	1000	0				Originally Reported
O2tpp	o2[p] <=> o2[c]	s0001	O2 transport via diffusion (periplasm)	Inorganic Ion Transport and Metabolism	1	-1000	1000	0				Originally Reported
OCBT	cbp[c] + orn[c] <=> h[c] + citr__L[c] + pi[c]	ECOLC_RS20215 or deleted	Ornithine carbamoyltransferase	Arginine and Proline Metabolism	1	-1000	1000	0				Originally Reported
OCTDPS	frdp[c] + 5 ipdp[c] -> octdp[c] + 5 ppi[c]	ECOLC_RS02725	Octaprenyl pyrophosphate synthase	Cofactor and Prosthetic Group Biosynthesis	0	0	1000	0				Originally Reported
OGMEACPD	hgmeACP[c] -> egmeACP[c] + h2o[c]	ECOLC_RS18705	3-Oxo-glutaryl-[ACP] methyl ester dehydratase	Cofactor and Prosthetic Group Biosynthesis	0	0	1000	0				Originally Reported
OGMEACPR	h[c] + ogmeACP[c] + nadph[c] -> hgmeACP[c] + nadp[c]	ECOLC_RS13455	3-Oxo-glutaryl-[ACP] methyl ester reductase	Cofactor and Prosthetic Group Biosynthesis	0	0	1000	0				Originally Reported
OGMEACPS	h[c] + malcoame[c] + malACP[c] -> ogmeACP[c] + coa[c] + co2[c]	ECOLC_RS13465	3-Oxo-glutaryl-[ACP] methyl ester synthase	Cofactor and Prosthetic Group Biosynthesis	0	0	1000	0				Originally Reported
OHPBAT	ohpb[c] + glu__L[c] <=> akg[c] + phthr[c]	ECOLC_RS14445	O-Phospho-4-hydroxy-L-threonine:2-oxoglutarate aminotransferase	Cofactor and Prosthetic Group Biosynthesis	1	-1000	1000	0				Experimental Esentially/Originally Reported
OHPHM	amet[c] + 2ohph[c] -> h[c] + ahcys[c] + 2omph[c]	ECOLC_RS07600	2-octaprenyl-6-hydroxyphenol methylase	"	0	0	1000	0				Added by Experimental Esentially
OMCDC	h[c] + 3c4mop[c] -> 4mop[c] + co2[c]	s0001	2-Oxo-4-methyl-3-carboxypentanoate decarboxylation	Valine, Leucine, and Isoleucine Metabolism	0	0	1000	0				Originally Reported
OMPDC	h[c] + orot5p[c] -> ump[c] + co2[c]	ECOLC_RS12560	Orotidine-5-phosphate decarboxylase	Purine and Pyrimidine Biosynthesis	0	0	1000	0				Experimental Esentially/Originally Reported
OMPHHXy	h[c] + o2[c] + 2omph[c] + nadph[c] -> nadp[c] + h2o[c] + 2ombzl[c]	"	2-octaprenyl-6-methoxyphenol hydroxylase (NADPH)	"	0	0	1000	0				Added by Experimental Esentially
OPHBDC	h[c] + 3ophb[c] -> 2oph[c] + co2[c]	ECOLC_RS22480 and ECOLC_RS07205	Octaprenyl-hydroxybenzoate decarboxylase	Cofactor and Prosthetic Group Biosynthesis	0	0	1000	0				Originally Reported
OPHHX3	nad[c] + 2 atp[c] + 2oph[c] + 3 h2o[c] -> 3 h[c] + 2 adp[c] + 2 pi[c] + 2ohph[c] + nadh[c]	"	2-Octaprenylphenol hydroxylase (anaerobic)	Cofactor and Prosthetic Group Biosynthesis	0	0	1000	0				Originally Reported
OPMEACPD	hpmeACP[c] -> epmeACP[c] + h2o[c]	ECOLC_RS18705	3-Oxo-pimeloyl-[ACP] methyl ester dehydratase	Cofactor and Prosthetic Group Biosynthesis	0	0	1000	0				Originally Reported
OPMEACPR	h[c] + opmeACP[c] + nadph[c] -> hpmeACP[c] + nadp[c]	ECOLC_RS13455	3-Oxo-pimeloyl-[ACP] methyl ester reductase	Cofactor and Prosthetic Group Biosynthesis	0	0	1000	0				Originally Reported
OPMEACPS	h[c] + gmeACP[c] + malACP[c] -> opmeACP[c] + co2[c] + ACP[c]	ECOLC_RS07145	3-Oxo-pimeloyl-[ACP] methyl ester synthase	Cofactor and Prosthetic Group Biosynthesis	0	0	1000	0				Originally Reported
ORPT	orot5p[c] + ppi[c] <=> prpp[c] + orot[c]	ECOLC_RS00375	Orotate phosphoribosyltransferase	Purine and Pyrimidine Biosynthesis	1	-1000	1000	0				Experimental Esentially/Originally Reported
P5CR	2 h[c] + 1pyr5c[c] + nadph[c] -> nadp[c] + pro__L[c]	ECOLC_RS17440	Pyrroline-5-carboxylate reductase	Arginine and Proline Metabolism	0	0	1000	0				Experimental Esentially/Originally Reported
PANTS	ala_B[c] + atp[c] + pant__R[c] -> h[c] + pnto__R[c] + ppi[c] + amp[c]	ECOLC_RS18940	Pantothenate synthase	Cofactor and Prosthetic Group Biosynthesis	0	0	1000	0				Experimental Esentially/Originally Reported
PAPPT3	ugmda[c] + udcpp[c] -> ump[c] + uagmda[c]	ECOLC_RS19170	Phospho-N-acetylmuramoyl-pentapeptide-transferase (meso-2,6-diaminopimelate)	Cell Envelope Biosynthesis	0	0	1000	0				Originally Reported
PAPSR	paps[c] + trdrd[c] -> 2 h[c] + so3[c] + trdox[c] + pap[c]	(ECOLC_RS05075 and ECOLC_RS05880) or (ECOLC_RS05075 and ECOLC_RS22790)	Phosphoadenylyl-sulfate reductase (thioredoxin)	"	0	0	1000	0				Added by Experimental Esentially
PAPSR2	paps[c] + grxrd[c] -> 2 h[c] + so3[c] + pap[c] + grxox[c]	(ECOLC_RS05075 and ECOLC_RS14755) or (ECOLC_RS05075 and ECOLC_RS13600) or (ECOLC_RS05075 and ECOLC_RS10620) or (ECOLC_RS05075 and ECOLC_RS00520)	Phosphoadenylyl-sulfate reductase (glutaredoxin)	Cysteine Metabolism	0	0	1000	0				Originally Reported
PDH	nad[c] + pyr[c] + coa[c] -> accoa[c] + nadh[c] + co2[c]	ECOLC_RS19035 and ECOLC_RS19030 and ECOLC_RS19025	Pyruvate dehydrogenase	Glycolysis/Gluconeogenesis	0	0	1000	0				Originally Reported
PDX5PO2	nad[c] + pdx5p[c] -> h[c] + pydx5p[c] + nadh[c]	"	Pyridoxine 5-phosphate oxidase (anaerboic	Cofactor and Prosthetic Group Biosynthesis	0	0	1000	0				Originally Reported
PDX5POi	o2[c] + pdx5p[c] -> pydx5p[c] + h2o2[c]	ECOLC_RS10700	Pyridoxine 5-phosphate oxidase	"	0	0	1000	0				Added by Experimental Esentially
PDX5PS	nad[c] + phthr[c] + dxyl5p[c] -> h[c] + pi[c] + pdx5p[c] + 2 h2o[c] + nadh[c] + co2[c]	ECOLC_RS19340 and ECOLC_RS05985	Pyridoxine 5-phosphate synthase	Cofactor and Prosthetic Group Biosynthesis	0	0	1000	0				Experimental Esentially/Originally Reported
PE160abcpp	atp[c] + pe160[c] + h2o[c] -> h[c] + adp[c] + pi[c] + pe160[p]	ECOLC_RS14410	Phosphatidylethanolamine transport via ABC system (n-C16:0, periplasm)	Transport, Inner Membrane	0	0	1000	0				Originally Reported
PE161abcpp	atp[c] + h2o[c] + pe161[c] -> h[c] + adp[c] + pi[c] + pe161[p]	ECOLC_RS14410	Phosphatidylethanolamine transport via ABC system (n-C16:1, periplasm)	Transport, Inner Membrane	0	0	1000	0				Originally Reported
PERD	nad[c] + 4per[c] <=> h[c] + ohpb[c] + nadh[c]	ECOLC_RS07160	Erythronate 4-phosphate (4per) dehydrogenase	Cofactor and Prosthetic Group Biosynthesis	1	-1000	1000	0				Experimental Esentially/Originally Reported
PFK	atp[c] + f6p[c] -> h[c] + adp[c] + fdp[c]	ECOLC_RS22100 or ECOLC_RS10260	Phosphofructokinase	Glycolysis/Gluconeogenesis	0	0	1000	0				Originally Reported
PFL	pyr[c] + coa[c] -> accoa[c] + for[c]	(ECOLC_RS14470 and ECOLC_RS14465) or (ECOLC_RS14470 and ECOLC_RS03100) or (ECOLC_RS21895 and ECOLC_RS21890) or ((ECOLC_RS14470 and ECOLC_RS14465) and ECOLC_RS05900)	Pyruvate formate lyase	Pyruvate Metabolism	0	0	1000	0				Originally Reported
PGAMT	gam1p[c] <=> gam6p[c]	ECOLC_RS02780	Phosphoglucosamine mutase	Cell Envelope Biosynthesis	1	-1000	1000	0				Experimental Esentially/Originally Reported
PGCD	3pg[c] + nad[c] -> h[c] + nadh[c] + 3php[c]	ECOLC_RS04245	Phosphoglycerate dehydrogenase	Glycine and Serine Metabolism	0	0	1000	0				Experimental Esentially/Originally Reported
PGI	g6p[c] <=> f6p[c]	ECOLC_RS21530	Glucose-6-phosphate isomerase	Glycolysis/Gluconeogenesis	1	-1000	1000	0				Originally Reported
PGK	3pg[c] + atp[c] <=> 13dpg[c] + adp[c]	ECOLC_RS04180	Phosphoglycerate kinase	Glycolysis/Gluconeogenesis	1	-1000	1000	0				Originally Reported
PGL	h2o[c] + 6pgl[c] -> h[c] + 6pgc[c]	ECOLC_RS15520	6-phosphogluconolactonase	Pentose Phosphate Pathway	0	0	1000	0				Originally Reported
PGM	2pg[c] <=> 3pg[c]	ECOLC_RS00510 or ECOLC_RS19665 or ECOLC_RS15580	Phosphoglycerate mutase	Glycolysis/Gluconeogenesis	1	-1000	1000	0				Originally Reported
PHETA1	akg[c] + phe__L[c] <=> phpyr[c] + glu__L[c]	ECOLC_RS21365 or ECOLC_RS14340 or ECOLC_RS22840	Phenylalanine transaminase	Tyrosine, Tryptophan, and Phenylalanine Metabolism	1	-1000	1000	0				Originally Reported
PIt2rpp	h[p] + pi[p] -> h[c] + pi[c]	ECOLC_RS03755 or ECOLC_RS01180	Phosphate reversible transport via symport (periplasm)	Inorganic Ion Transport and Metabolism	0	0	1000	0				Originally Reported
PItex	pi[e] <=> pi[p]	ECOLC_RS17950 or ECOLC_RS14330 or ECOLC_RS12200 or ECOLC_RS07685	Phosphate transport via diffusion (extracellular to periplasm)	Transport, Outer Membrane Porin	1	-1000	1000	0				Originally Reported
PMDPHT	h2o[c] + 5aprbu[c] -> pi[c] + 4r5au[c]	"	Pyrimidine phosphatase	Cofactor and Prosthetic Group Biosynthesis	0	0	1000	0				Originally Reported
PMEACPE	pmeACP[c] + h2o[c] -> pimACP[c] + meoh[c]	ECOLC_RS01605	Pimeloyl-[ACP] methyl ester esterase	Cofactor and Prosthetic Group Biosynthesis	0	0	1000	0				Originally Reported
PMPK	4ampm[c] + atp[c] -> adp[c] + 2mahmp[c]	ECOLC_RS08265	Phosphomethylpyrimidine kinase	Cofactor and Prosthetic Group Biosynthesis	0	0	1000	0				Originally Reported
PNTK	pnto__R[c] + atp[c] -> h[c] + adp[c] + 4ppan[c]	ECOLC_RS21780	Pantothenate kinase	Cofactor and Prosthetic Group Biosynthesis	0	0	1000	0				Originally Reported
POR5	2 flxso[c] + pyr[c] + coa[c] <=> h[c] + 2 flxr[c] + accoa[c] + co2[c]	(ECOLC_RS15970 and ECOLC_RS12195) or (ECOLC_RS04330 and ECOLC_RS12195)	Pyruvate synthase	Pyruvate Metabolism	1	-1000	1000	0				Originally Reported
POX	h2o[c] + q8[c] + pyr[c] -> ac[c] + q8h2[c] + co2[c]	ECOLC_RS14640	Pyruvate oxidase	Oxidative Phosphorylation	0	0	1000	0				Originally Reported
PPBNGS	2 5aop[c] -> h[c] + 2 h2o[c] + ppbng[c]	ECOLC_RS17515	Porphobilinogen synthase	Cofactor and Prosthetic Group Biosynthesis	0	0	1000	0				Originally Reported
PPC	pep[c] + h2o[c] + co2[c] -> h[c] + pi[c] + oaa[c]	ECOLC_RS21870	Phosphoenolpyruvate carboxylase	Anaplerotic Reactions	0	0	1000	0				Experimental Esentially/Originally Reported
PPCDC	h[c] + 4ppcys[c] -> pan4p[c] + co2[c]	ECOLC_RS00390	Phosphopantothenoylcysteine decarboxylase	Cofactor and Prosthetic Group Biosynthesis	0	0	1000	0				Originally Reported
PPCK	atp[c] + oaa[c] -> pep[c] + adp[c] + co2[c]	ECOLC_RS01650	Phosphoenolpyruvate carboxykinase	Anaplerotic Reactions	0	0	1000	0				Originally Reported
PPK	pi[c] + atp[c] <=> adp[c] + ppi[c]	ECOLC_RS06320	Polyphosphate kinase	"	1	-1000	1000	0				Change based on iML1515
PPM	r1p[c] <=> r5p[c]	ECOLC_RS01770 or ECOLC_RS19730	Phosphopentomutase	Alternate Carbon Metabolism	1	-1000	1000	0				Originally Reported
PPNCL2	ctp[c] + cys__L[c] + 4ppan[c] -> h[c] + ppi[c] + cmp[c] + 4ppcys[c]	ECOLC_RS00390	Phosphopantothenate-cysteine ligase	Cofactor and Prosthetic Group Biosynthesis	0	0	1000	0				Originally Reported
PPND	nad[c] + pphn[c] -> 34hpp[c] + nadh[c] + co2[c]	ECOLC_RS05790	Prephenate dehydrogenase	Tyrosine, Tryptophan, and Phenylalanine Metabolism	0	0	1000	0				Experimental Esentially/Originally Reported
PPNDH	h[c] + pphn[c] -> phpyr[c] + h2o[c] + co2[c]	ECOLC_RS05795	Prephenate dehydratase	Tyrosine, Tryptophan, and Phenylalanine Metabolism	0	0	1000	0				Experimental Esentially/Originally Reported
PPPGO3	3 fum[c] + pppg9[c] -> ppp9[c] + 3 succ[c]	ECOLC_RS22445	Protoporphyrinogen oxidase (anaerobic)	Cofactor and Prosthetic Group Biosynthesis	0	0	1000	0				Originally Reported
PPS	atp[c] + h2o[c] + pyr[c] -> pep[c] + 2 h[c] + pi[c] + amp[c]	ECOLC_RS10370	Phosphoenolpyruvate synthase	Glycolysis/Gluconeogenesis	0	0	1000	0				Originally Reported
PRAGSr	atp[c] + gly[c] + pram[c] <=> h[c] + adp[c] + pi[c] + gar[c]	ECOLC_RS21625	Phosphoribosylglycinamide synthase	Purine and Pyrimidine Biosynthesis	1	-1000	1000	0				Experimental Esentially/Originally Reported
PRAIi	pran[c] -> 2cpr5p[c]	ECOLC_RS12675	Phosphoribosylanthranilate isomerase (irreversible)	Tyrosine, Tryptophan, and Phenylalanine Metabolism	0	0	1000	0				Experimental Esentially/Originally Reported
PRAIS	fpram[c] + atp[c] -> 2 h[c] + adp[c] + air[c] + pi[c]	ECOLC_RS06330	Phosphoribosylaminoimidazole synthase	Purine and Pyrimidine Biosynthesis	0	0	1000	0				Experimental Esentially/Originally Reported
PRAMPC	prbamp[c] + h2o[c] -> prfp[c]	ECOLC_RS08640	Phosphoribosyl-AMP cyclohydrolase	Histidine Metabolism	0	0	1000	0				Experimental Esentially/Originally Reported
PRASCSi	5aizc[c] + asp__L[c] + atp[c] -> h[c] + adp[c] + pi[c] + 25aics[c]	ECOLC_RS06450	Phosphoribosylaminoimidazolesuccinocarboxamide synthase	"	0	0	1000	0				Experimental Esentially/Originally Reported
PRATPP	prbatp[c] + h2o[c] -> prbamp[c] + h[c] + ppi[c]	ECOLC_RS08640	Phosphoribosyl-ATP pyrophosphatase	Histidine Metabolism	0	0	1000	0				Experimental Esentially/Originally Reported
PRFGS	atp[c] + gln__L[c] + h2o[c] + fgam[c] -> fpram[c] + h[c] + adp[c] + pi[c] + glu__L[c]	ECOLC_RS06035	Phosphoribosylformylglycinamidine synthase	Purine and Pyrimidine Biosynthesis	0	0	1000	0				Experimental Esentially/Originally Reported
PRMICI	prfp[c] <=> prlp[c]	ECOLC_RS08650	1-(5-phosphoribosyl)-5-[(5-phosphoribosylamino)methylideneamino)imidazole-4-carboxamide isomerase	Histidine Metabolism	1	-1000	1000	0				Experimental Esentially/Originally Reported
PROt2rpp	h[p] + pro__L[p] <=> h[c] + pro__L[c]	ECOLC_RS21070	L-proline reversible transport via proton symport (periplasm)	Transport, Inner Membrane	1	-1000	1000	0				Originally Reported
PROt4pp	na1[p] + pro__L[p] -> pro__L[c] + na1[c]	ECOLC_RS13860	Na+/Proline-L symporter (periplasm)	Transport, Inner Membrane	0	0	1000	0				Originally Reported
PRPPS	r5p[c] + atp[c] <=> h[c] + prpp[c] + amp[c]	ECOLC_RS12970	Phosphoribosylpyrophosphate synthetase	Histidine Metabolism	1	-1000	1000	0				Originally Reported
PSCVT	pep[c] + skm5p[c] <=> pi[c] + 3psme[c]	ECOLC_RS14440	3-phosphoshikimate 1-carboxyvinyltransferase	Tyrosine, Tryptophan, and Phenylalanine Metabolism	1	-1000	1000	0				Experimental Esentially/Originally Reported
PSD160	h[c] + ps160[c] -> pe160[c] + co2[c]	ECOLC_RS20710	Phosphatidylserine decarboxylase (n-C16:0)	Glycerophospholipid Metabolism	0	0	1000	0				Originally Reported
PSD161	h[c] + ps161[c] -> pe161[c] + co2[c]	ECOLC_RS20710	Phosphatidylserine decarboxylase (n-C16:1)	Glycerophospholipid Metabolism	0	0	1000	0				Originally Reported
PSERT	glu__L[c] + 3php[c] -> akg[c] + pser__L[c]	ECOLC_RS14445	Phosphoserine transaminase	Glycine and Serine Metabolism	0	0	1000	0				Experimental Esentially/Originally Reported
PSP_L	pser__L[c] + h2o[c] -> ser__L[c] + pi[c]	ECOLC_RS19705	Phosphoserine phosphatase (L-serine)	Glycine and Serine Metabolism	0	0	1000	0				Experimental Esentially/Originally Reported
PSSA160	ser__L[c] + cdpdhdecg[c] -> h[c] + ps160[c] + cmp[c]	ECOLC_RS05865	Phosphatidylserine syntase (n-C16:0)	Glycerophospholipid Metabolism	0	0	1000	0				Originally Reported
PSSA161	cdpdhdec9eg[c] + ser__L[c] -> h[c] + ps161[c] + cmp[c]	ECOLC_RS05865	Phosphatidylserine syntase (n-C16:1)	Glycerophospholipid Metabolism	0	0	1000	0				Originally Reported
PTAr	accoa[c] + pi[c] <=> actp[c] + coa[c]	ECOLC_RS07275 or ECOLC_RS06550	Phosphotransacetylase	Pyruvate Metabolism	1	-1000	1000	0				Originally Reported
PTPATi	h[c] + pan4p[c] + atp[c] -> ppi[c] + dpcoa[c]	ECOLC_RS00415	Pantetheine-phosphate adenylyltransferase	Cofactor and Prosthetic Group Biosynthesis	0	0	1000	0				Originally Reported
PUNP1	pi[c] + adn[c] <=> r1p[c] + ade[c]	ECOLC_RS19725	Purine-nucleoside phosphorylase (Adenosine)	Nucleotide Salvage Pathway	1	-1000	1000	0				Originally Reported
PUNP2	pi[c] + dad_2[c] <=> 2dr1p[c] + ade[c]	ECOLC_RS19725	Purine-nucleoside phosphorylase (Deoxyadenosine)	Nucleotide Salvage Pathway	1	-1000	1000	0				Originally Reported
PYAM5PO	o2[c] + pyam5p[c] + h2o[c] -> pydx5p[c] + nh4[c] + h2o2[c]	ECOLC_RS10700	Pyridoxamine 5-phosphate oxidase	"	0	0	1000	0				Added by Experimental Esentially
PYK	pep[c] + h[c] + adp[c] -> atp[c] + pyr[c]	ECOLC_RS09540 or ECOLC_RS10505	Pyruvate kinase	Glycolysis/Gluconeogenesis	0	0	1000	0				Originally Reported
PYNP2r	pi[c] + uri[c] <=> r1p[c] + ura[c]	ECOLC_RS22530	Pyrimidine-nucleoside phosphorylase (uracil)	Nucleotide Salvage Pathway	1	-1000	1000	0				Originally Reported
QULNS	dhap[c] + iasp[c] -> quln[c] + pi[c] + 2 h2o[c]	ECOLC_RS15610	Quinolinate synthase	Cofactor and Prosthetic Group Biosynthesis	0	0	1000	0				Experimental Esentially/Originally Reported
RBFK	atp[c] + ribflv[c] -> h[c] + adp[c] + fmn[c]	ECOLC_RS19490	Riboflavin kinase	Cofactor and Prosthetic Group Biosynthesis	0	0	1000	0				Originally Reported
RBFSa	4r5au[c] + db4p[c] -> dmlz[c] + pi[c] + 2 h2o[c]	ECOLC_RS10575	Riboflavin synthase	Cofactor and Prosthetic Group Biosynthesis	0	0	1000	0				Originally Reported
RBFSb	2 dmlz[c] -> 4r5au[c] + ribflv[c]	ECOLC_RS17290	Riboflavin synthase	Cofactor and Prosthetic Group Biosynthesis	0	0	1000	0				Originally Reported
RHCCE	rhcys[c] -> dhptd[c] + hcys__L[c]	ECOLC_RS05460	S-ribosylhomocysteine cleavage enzyme	Methionine Metabolism	0	0	1000	0				Originally Reported
RNTR1c2	2 h[c] + 2 flxr[c] + atp[c] -> datp[c] + h2o[c] + 2 flxso[c]	(ECOLC_RS15970 and ECOLC_RS22060 and ECOLC_RS20295 and ECOLC_RS20300) or (ECOLC_RS04330 and ECOLC_RS22060 and ECOLC_RS20295 and ECOLC_RS20300) or (ECOLC_RS15970 and ECOLC_RS20295) or (ECOLC_RS04330 and ECOLC_RS20295)	Ribonucleoside-triphosphate reductase (ATP) (flavodoxin)	Nucleotide Salvage Pathway	0	0	1000	0				Originally Reported
RNTR2c2	2 h[c] + 2 flxr[c] + gtp[c] -> h2o[c] + 2 flxso[c] + dgtp[c]	(ECOLC_RS15970 and ECOLC_RS22060 and ECOLC_RS20295 and ECOLC_RS20300) or (ECOLC_RS04330 and ECOLC_RS22060 and ECOLC_RS20295 and ECOLC_RS20300) or (ECOLC_RS15970 and ECOLC_RS20295) or (ECOLC_RS04330 and ECOLC_RS20295)	Ribonucleoside-triphosphate reductase (GTP) (flavodoxin)	Nucleotide Salvage Pathway	0	0	1000	0				Originally Reported
RNTR3c2	2 h[c] + 2 flxr[c] + ctp[c] -> dctp[c] + h2o[c] + 2 flxso[c]	(ECOLC_RS15970 and ECOLC_RS22060 and ECOLC_RS20295 and ECOLC_RS20300) or (ECOLC_RS04330 and ECOLC_RS22060 and ECOLC_RS20295 and ECOLC_RS20300) or (ECOLC_RS15970 and ECOLC_RS20295) or (ECOLC_RS04330 and ECOLC_RS20295)	Ribonucleoside-triphosphate reductase (CTP) (flavodoxin)	Nucleotide Salvage Pathway	0	0	1000	0				Originally Reported
RPE	ru5p__D[c] <=> xu5p__D[c]	deleted or ECOLC_RS01740	Ribulose 5-phosphate 3-epimerase	Pentose Phosphate Pathway	1	-1000	1000	0				Originally Reported
RPI	r5p[c] <=> ru5p__D[c]	ECOLC_RS04240 or ECOLC_RS21170	Ribose-5-phosphate isomerase	Pentose Phosphate Pathway	1	-1000	1000	0				Originally Reported
SADT2	atp[c] + h2o[c] + so4[c] + gtp[c] -> pi[c] + gdp[c] + ppi[c] + aps[c]	ECOLC_RS05130 and ECOLC_RS05125	Sulfate adenyltransferase	Cysteine Metabolism	0	0	1000	0				Experimental Esentially/Originally Reported
SBTptspp	pep[c] + sbt__D[p] -> sbt6p[c] + pyr[c]	ECOLC_RS06770 and ECOLC_RS06765 and ECOLC_RS05380 and ECOLC_RS05370 and ECOLC_RS05375	D-sorbitol transport via PEP:Pyr PTS (periplasm)	"	0	0	1000	0				Added by Experimental Esentially
SDPDS	sl26da[c] + h2o[c] -> 26dap_LL[c] + succ[c]	ECOLC_RS06475	Succinyl-diaminopimelate desuccinylase	Threonine and Lysine Metabolism	0	0	1000	0				Originally Reported
SDPTA	akg[c] + sl26da[c] <=> glu__L[c] + sl2a6o[c]	ECOLC_RS01870	Succinyldiaminopimelate transaminase	Threonine and Lysine Metabolism	1	-1000	1000	0				Experimental Esentially/Originally Reported
SELabcpp	atp[c] + sel[p] + h2o[c] -> h[c] + adp[c] + pi[c] + sel[c]	"	Selenatenate transport via ABC system (periplasm)	"	0	0	1000	0				Added by Experimental Esentially
SERAT	ser__L[c] + accoa[c] <=> acser[c] + coa[c]	ECOLC_RS00535	Serine O-acetyltransferase	Cysteine Metabolism	1	-1000	1000	0				Experimental Esentially/Originally Reported
SHCHD2	nad[c] + dscl[c] -> h[c] + scl[c] + nadh[c]	ECOLC_RS01825	Sirohydrochlorin dehydrogenase (NAD)	Cofactor and Prosthetic Group Biosynthesis	0	0	1000	0				Originally Reported
SHCHF	fe2[c] + scl[c] -> 3 h[c] + sheme[c]	ECOLC_RS01825	Sirohydrochlorin ferrochelatase	Cofactor and Prosthetic Group Biosynthesis	0	0	1000	0				Originally Reported
SHK3Dr	h[c] + 3dhsk[c] + nadph[c] <=> skm[c] + nadp[c]	ECOLC_RS10425 or ECOLC_RS02270	Shikimate dehydrogenase	Tyrosine, Tryptophan, and Phenylalanine Metabolism	1	-1000	1000	0				Experimental Esentially/Originally Reported
SHKK	skm[c] + atp[c] -> h[c] + adp[c] + skm5p[c]	ECOLC_RS01720 or ECOLC_RS17430	Shikimate kinase	Tyrosine, Tryptophan, and Phenylalanine Metabolism	0	0	1000	0				Originally Reported
SHSL1	cys__L[c] + suchms[c] -> h[c] + cyst__L[c] + succ[c]	ECOLC_RS21960	O-succinylhomoserine lyase (L-cysteine)	Methionine Metabolism	0	0	1000	0				Experimental Esentially/Originally Reported
SLNTabcpp	slnt[p] + atp[c] + h2o[c] -> h[c] + adp[c] + pi[c] + slnt[c]	"	Selenite ABC transporter (periplasm)	"	0	0	1000	0				Added by Experimental Esentially
SO4t2pp	h[p] + so4[p] -> h[c] + so4[c]	ECOLC_RS12975	Sulfate transport in via proton symport (periplasm to cytoplasm)	Inorganic Ion Transport and Metabolism	0	0	1000	0				Originally Reported
SO4tex	so4[e] <=> so4[p]	ECOLC_RS17950 or ECOLC_RS14330 or ECOLC_RS12200 or ECOLC_RS07685	Sulfate transport via diffusion (extracellular to periplasm)	Transport, Outer Membrane Porin	1	-1000	1000	0				Originally Reported
SUCCt1pp	succ[p] <=> succ[c]	"	Succinate transport via diffusion in (periplasm)	"	1	-1000	1000	0				Change based on iML1515
SUCCt2_2pp	2 h[p] + succ[p] -> 2 h[c] + succ[c]	ECOLC_RS00990	Succinate transport via proton symport (2 H) (periplasm)	Transport, Inner Membrane	0	0	1000	0				Originally Reported
SUCCtex	succ[e] <=> succ[p]	ECOLC_RS17950 or ECOLC_RS14330 or ECOLC_RS12200 or ECOLC_RS07685	Succinate transport via diffusion (extracellular to periplasm)	Transport, Outer Membrane Porin	1	-1000	1000	0				Originally Reported
SUCDi	q8[c] + succ[c] -> q8h2[c] + fum[c]	ECOLC_RS15765 and ECOLC_RS15760 and ECOLC_RS15755 and ECOLC_RS15750	Succinate dehydrogenase (irreversible)	Oxidative Phosphorylation	0	0	1000	0				Originally Reported
SUCFUMtpp	fum[p] + succ[c] -> succ[p] + fum[c]	ECOLC_RS21000 or ECOLC_RS16275 or ECOLC_RS20830	Succinate:fumarate antiporter (periplasm)	Transport, Inner Membrane	0	0	1000	0				Originally Reported
SUCOAS	atp[c] + succ[c] + coa[c] <=> adp[c] + pi[c] + succoa[c]	ECOLC_RS15730 and ECOLC_RS15725	Succinyl-CoA synthetase (ADP-forming)	Citric Acid Cycle	1	-1000	1000	0				Originally Reported
SUCptspp	pep[c] + sucr[p] -> pyr[c] + suc6p[c]	ECOLC_RS06760 and ECOLC_RS06705 and ECOLC_RS06770 and ECOLC_RS06765	Sucrose transport via PEP:Pyr (periplasm)	"	0	0	1000	0				Added by Experimental Esentially
SULabcpp	atp[c] + h2o[c] + so4[p] -> h[c] + adp[c] + pi[c] + so4[c]	(ECOLC_RS06740 and ECOLC_RS06725 and ECOLC_RS06730 and ECOLC_RS06735) or (ECOLC_RS15540 and ECOLC_RS15525 and ECOLC_RS15530) or (ECOLC_RS06740 and ECOLC_RS06730 and ECOLC_RS06735 and ECOLC_RS22095)	Sulfate transport via ABC system (periplasm)	"	0	0	1000	0				Added by Experimental Esentially
SULR	3 nadph[c] + 5 h[c] + so3[c] -> 3 nadp[c] + 3 h2o[c] + h2s[c]	ECOLC_RS05070 and ECOLC_RS05065	Sulfite reductase (NADPH2)	Cysteine Metabolism	0	0	1000	0				Experimental Esentially/Originally Reported
TALA	g3p[c] + s7p[c] <=> e4p[c] + f6p[c]	ECOLC_RS06520 or ECOLC_RS19580	Transaldolase	Pentose Phosphate Pathway	1	-1000	1000	0				Originally Reported
TDSK	atp[c] + lipidAds[c] -> h[c] + adp[c] + lipidA[c]	ECOLC_RS14405	Tetraacyldisaccharide 4kinase	Lipopolysaccharide Biosynthesis / Recycling	0	0	1000	0				Originally Reported
THD2pp	2 h[p] + nadp[c] + nadh[c] -> 2 h[c] + nad[c] + nadph[c]	ECOLC_RS10890 and ECOLC_RS10885	NAD(P) transhydrogenase (periplasm)	Oxidative Phosphorylation	0	0	1000	0				Originally Reported
THDPS	h2o[c] + thdp[c] + succoa[c] -> sl2a6o[c] + coa[c]	ECOLC_RS18775	Tetrahydrodipicolinate succinylase	Threonine and Lysine Metabolism	0	0	1000	0				Originally Reported
THFAT	h2o[c] + methf[c] -> h[c] + 5fthf[c]	ECOLC_RS06065	Tetrahydrofolate aminomethyltransferase	"	0	0	1000	0				Added by Experimental Esentially
THRA	thr__L[c] -> gly[c] + acald[c]	ECOLC_RS06065 or ECOLC_RS14645	Threonine aldolase	"	0	0	1000	0				Added by Experimental Esentially
THRA2	athr__L[c] -> gly[c] + acald[c]	ECOLC_RS06065 or ECOLC_RS14645	L-allo-Threonine Aldolase	"	0	0	1000	0				Added by Experimental Esentially
THRD_L	thr__L[c] -> nh4[c] + 2obut[c]	ECOLC_RS03085 or ECOLC_RS22830	L-threonine deaminase	Valine, Leucine, and Isoleucine Metabolism	0	0	1000	0				Originally Reported
THRS	h2o[c] + phom[c] -> thr__L[c] + pi[c]	ECOLC_RS19605	Threonine synthase	Threonine and Lysine Metabolism	0	0	1000	0				Experimental Esentially/Originally Reported
THZPSN3	h[c] + iscssh[c] + atp[c] + dxyl5p[c] + dhgly[c] + nadph[c] -> ppi[c] + nadp[c] + 2 h2o[c] + 4mpetz[c] + iscs[c] + amp[c] + co2[c]	ECOLC_RS06170 and ECOLC_RS21690 and ECOLC_RS21705 and ECOLC_RS17250 and thiS	Thiazole phosphate synthesis	Cofactor and Prosthetic Group Biosynthesis	0	0	1000	0				Originally Reported
TKT1	r5p[c] + xu5p__D[c] <=> g3p[c] + s7p[c]	ECOLC_RS04140 or ECOLC_RS06515	Transketolase	Pentose Phosphate Pathway	1	-1000	1000	0				Originally Reported
TKT2	xu5p__D[c] + e4p[c] <=> g3p[c] + f6p[c]	ECOLC_RS04140 or ECOLC_RS06515	Transketolase	Pentose Phosphate Pathway	1	-1000	1000	0				Originally Reported
TMDS	mlthf[c] + dump[c] -> dtmp[c] + dhf[c]	ECOLC_RS04745	Thymidylate synthase	Nucleotide Salvage Pathway	0	0	1000	0				Experimental Esentially/Originally Reported
TMPK	atp[c] + thmmp[c] -> thmpp[c] + adp[c]	ECOLC_RS17280	Thiamine-phosphate kinase	Cofactor and Prosthetic Group Biosynthesis	0	0	1000	0				Originally Reported
TMPPP	h[c] + 2mahmp[c] + 4mpetz[c] -> ppi[c] + thmmp[c]	ECOLC_RS21685	Thiamine-phosphate diphosphorylase	Cofactor and Prosthetic Group Biosynthesis	0	0	1000	0				Originally Reported
TPI	dhap[c] <=> g3p[c]	ECOLC_RS22085	Triose-phosphate isomerase	Glycolysis/Gluconeogenesis	1	-1000	1000	0				Originally Reported
TREptspp	pep[c] + tre[p] -> tre6p[c] + pyr[c]	ECOLC_RS06760 and ECOLC_RS06770 and ECOLC_RS06765 and ECOLC_RS20285	Trehalose transport via PEP:Pyr PTS (periplasm)	"	0	0	1000	0				Added by Experimental Esentially
TRPAS2	trp__L[c] + h2o[c] <=> nh4[c] + indole[c] + pyr[c]	ECOLC_RS23140	Tryptophanase (L-tryptophan)	Tyrosine, Tryptophan, and Phenylalanine Metabolism	1	-1000	1000	0				Originally Reported
TRPS1	ser__L[c] + 3ig3p[c] -> g3p[c] + trp__L[c] + h2o[c]	ECOLC_RS12685 and ECOLC_RS12680	Tryptophan synthase (indoleglycerol phosphate)	"	0	0	1000	0				Added by Experimental Esentially
TRPS2	ser__L[c] + indole[c] -> trp__L[c] + h2o[c]	ECOLC_RS12685 and ECOLC_RS12680	Tryptophan synthase (indole)	"	0	0	1000	0				Added by Experimental Esentially
TRPS3	3ig3p[c] -> g3p[c] + indole[c]	ECOLC_RS12685 and ECOLC_RS12680	Tryptophan synthase (indoleglycerol phosphate)	Tyrosine, Tryptophan, and Phenylalanine Metabolism	0	0	1000	0				Experimental Esentially/Originally Reported
TRSARr	h[c] + 2h3oppan[c] + nadh[c] <=> nad[c] + glyc__R[c]	ECOLC_RS16750 or ECOLC_RS03055	Tartronate semialdehyde reductase	Alternate Carbon Metabolism	1	-1000	1000	0				Originally Reported
TSULabcpp	atp[c] + h2o[c] + tsul[p] -> h[c] + adp[c] + pi[c] + tsul[c]	(ECOLC_RS06740 and ECOLC_RS06725 and ECOLC_RS06730 and ECOLC_RS06735) or (ECOLC_RS06740 and ECOLC_RS06730 and ECOLC_RS06735 and ECOLC_RS22095)	Thiosulfate transport via ABC system (periplasm)	"	0	0	1000	0				Added by Experimental Esentially
TYRL	amet[c] + tyr__L[c] + nadph[c] -> h[c] + met__L[c] + 4crsol[c] + dad_5[c] + nadp[c] + dhgly[c]	ECOLC_RS21700	Tyrosine lyase	Cofactor and Prosthetic Group Biosynthesis	0	0	1000	0				Originally Reported
TYRTA	akg[c] + tyr__L[c] <=> 34hpp[c] + glu__L[c]	ECOLC_RS21365 or ECOLC_RS14340	Tyrosine transaminase	Tyrosine, Tryptophan, and Phenylalanine Metabolism	1	-1000	1000	0				Originally Reported
U23GAAT	u3hga[c] + 3hmrsACP[c] -> h[c] + u23ga[c] + ACP[c]	ECOLC_RS18710	UDP-3-O-(3-hydroxymyristoyl)glucosamine acyltransferase	Lipopolysaccharide Biosynthesis / Recycling	0	0	1000	0				Originally Reported
UAAGDS	atp[c] + 26dap__M[c] + uamag[c] -> h[c] + adp[c] + pi[c] + ugmd[c]	ECOLC_RS19180	UDP-N-acetylmuramoyl-L-alanyl-D-glutamyl-meso-2,6-diaminopimelate synthetase	Cell Envelope Biosynthesis	0	0	1000	0				Originally Reported
UAGAAT	uacgam[c] + 3hmrsACP[c] <=> u3aga[c] + ACP[c]	ECOLC_RS13450 and ECOLC_RS18700	UDP-N-acetylglucosamine acyltransferase	Lipopolysaccharide Biosynthesis / Recycling	1	-1000	1000	0				Originally Reported
UAGCVT	pep[c] + uacgam[c] -> pi[c] + uaccg[c]	ECOLC_RS02715	UDP-N-acetylglucosamine 1-carboxyvinyltransferase	Cell Envelope Biosynthesis	0	0	1000	0				Originally Reported
UAGDP	h[c] + acgam1p[c] + utp[c] -> ppi[c] + uacgam[c]	ECOLC_RS23030	UDP-N-acetylglucosamine diphosphorylase	Cell Envelope Biosynthesis	0	0	1000	0				Originally Reported
UAGPT3	uagmda[c] + uacgam[c] -> h[c] + uaagmda[c] + udp[c]	ECOLC_RS19155	UDP-N-acetylglucosamine-N-acetylmuramyl-(pentapeptide)pyrophosphoryl-undecaprenol N-acetylglucosamine transferase	Cell Envelope Biosynthesis	0	0	1000	0				Originally Reported
UAMAGS	atp[c] + glu__D[c] + uama[c] -> h[c] + adp[c] + pi[c] + uamag[c]	ECOLC_RS19165	UDP-N-acetylmuramoyl-L-alanyl-D-glutamate synthetase	Cell Envelope Biosynthesis	0	0	1000	0				Originally Reported
UAMAS	uamr[c] + atp[c] + ala__L[c] -> h[c] + adp[c] + pi[c] + uama[c]	ECOLC_RS19150	UDP-N-acetylmuramoyl-L-alanine synthetase	Cell Envelope Biosynthesis	0	0	1000	0				Originally Reported
UAPGR	h[c] + uaccg[c] + nadph[c] -> uamr[c] + nadp[c]	ECOLC_RS21790	UDP-N-acetylenolpyruvoylglucosamine reductase	Cell Envelope Biosynthesis	0	0	1000	0				Originally Reported
UDCPDP	udcpdp[c] + h2o[c] -> h[c] + pi[c] + udcpp[c]	ECOLC_RS15030 or ECOLC_RS12575 or ECOLC_RS03400	Undecaprenyl-diphosphatase	Cell Envelope Biosynthesis	0	0	1000	0				Originally Reported
UDCPDPS	frdp[c] + 8 ipdp[c] -> 8 ppi[c] + udcpdp[c]	ECOLC_RS18735	Undecaprenyl diphosphate synthase	Cofactor and Prosthetic Group Biosynthesis	0	0	1000	0				Originally Reported
UGMDDS	atp[c] + ugmd[c] + alaala[c] -> h[c] + adp[c] + pi[c] + ugmda[c]	ECOLC_RS19175	UDP-N-acetylmuramoyl-L-alanyl-D-glutamyl-meso-2,6-diaminopimeloyl-D-alanyl-D-alanine synthetase	Cell Envelope Biosynthesis	0	0	1000	0				Originally Reported
UHGADA	u3aga[c] + h2o[c] -> ac[c] + u3hga[c]	ECOLC_RS19125	UDP-3-O-acetylglucosamine deacetylase	Lipopolysaccharide Biosynthesis / Recycling	0	0	1000	0				Originally Reported
UMPK	ump[c] + atp[c] <=> adp[c] + udp[c]	ECOLC_RS14430 or ECOLC_RS18750	UMP kinase	Nucleotide Salvage Pathway	1	-1000	1000	0				Originally Reported
UPP3MT	2 amet[c] + uppg3[c] -> h[c] + dscl[c] + 2 ahcys[c]	ECOLC_RS22670 or ECOLC_RS01825	Uroporphyrinogen methyltransferase	Cofactor and Prosthetic Group Biosynthesis	0	0	1000	0				Originally Reported
UPP3S	hmbil[c] -> uppg3[c] + h2o[c]	ECOLC_RS22665	Uroporphyrinogen-III synthase	Cofactor and Prosthetic Group Biosynthesis	0	0	1000	0				Originally Reported
UPPDC1	4 h[c] + uppg3[c] -> cpppg3[c] + 4 co2[c]	ECOLC_RS21665	Uroporphyrinogen decarboxylase (uroporphyrinogen III)	Cofactor and Prosthetic Group Biosynthesis	0	0	1000	0				Originally Reported
USHD	u23ga[c] + h2o[c] -> 2 h[c] + ump[c] + lipidX[c]	ECOLC_RS16670	UDP-sugar hydrolase	Lipopolysaccharide Biosynthesis / Recycling	0	0	1000	0				Originally Reported
VALTA	akg[c] + val__L[c] <=> 3mob[c] + glu__L[c]	ECOLC_RS22840	Valine transaminase	Valine, Leucine, and Isoleucine Metabolism	1	-1000	1000	0				Originally Reported
Zn2tex	zn2[e] <=> zn2[p]	ECOLC_RS17950 or ECOLC_RS14330 or ECOLC_RS12200 or ECOLC_RS07685	Zinc (Zn+2) transport via diffusion (extracellular to periplasm)	Transport, Outer Membrane Porin	1	-1000	1000	0				Originally Reported
ZN2tpp	zn2[p] -> zn2[c]	ECOLC_RS03495	Zinc transport in via permease (no H+)	Inorganic Ion Transport and Metabolism	0	0	1000	0				Originally Reported
ACM6PH	acmum6p[c] + h2o[c] -> acgam6p[c] + lac__D[c]	ECOLC_RS06710	N-acetylmuramate 6-phosphate hydrolase	Alternate Carbon Metabolism	0	0	1000	0				Added by GapFill
AGDC	acgam6p[c] + h2o[c] -> ac[c] + gam6p[c]	ECOLC_RS16015	N-acetylglucosamine-6-phosphate deacetylase	Alternate Carbon Metabolism	0	0	1000	0				Added by GapFill
AMANAPEr	acmanap[c] <=> acgam6p[c]	ECOLC_RS02570	N-acetylmannosamine 6-phosphate epimerase	Alternate Carbon Metabolism	1	-1000	1000	0				Added by GapFill
4HTHRA	4hthr[c] <=> gly[c] + gcald[c]	"	4-hydroxy-L-threonine aldolase	"	1	-1000	1000	0				Added by GapFill
4HTHRS	h2o[c] + phthr[c] -> pi[c] + 4hthr[c]	ECOLC_RS19605	4-Hydroxy-L-threonine synthase	Cofactor and Prosthetic Group Biosynthesis	0	0	1000	0				Added by GapFill
4HTHRtex	4hthr[e] <=> 4hthr[p]	"	4-hydroxy-L-threonine transport	Transport	1	-1000	1000	0				Added by GapFill
4HTHRtrpp	h[p] + 4hthr[p] <=> h[c] + 4hthr[c]	"	4-hydroxy-L-threonine transport	Transport, Inner Membrane	1	-1000	1000	0				Added by GapFill
EX_4hthr_e	4hthr[e] ->	"	4-Hydroxy-L-threonine Exchange	Exchange	0	0	1000	0				Added by GapFill
ACGAtex	acgam[e] <=> acgam[p]	ECOLC_RS17950 or ECOLC_RS14330 or ECOLC_RS12200 or ECOLC_RS07685	N-Acetyl-D-glucosamine transport via diffusion (extracellular to periplasm)	Transport, Outer Membrane Porin	1	-1000	1000	0				Added by GapFill
EX_acgam_e	acgam[e] ->	"	N-Acetyl-D-glucosamine exchange	"	0	0	1000	0				Added by GapFill
EX_tsul_e	tsul[e] ->	"	Thiosulfate exchange	"	0	0	1000	0				Added by GapFill
TSULtex	tsul[e] <=> tsul[p]	ECOLC_RS17950 or ECOLC_RS14330 or ECOLC_RS12200 or ECOLC_RS07685	Thiosulfate transport via diffusion (extracellular to periplasm)	Transport, Outer Membrane Porin	1	-1000	1000	0				Added by GapFill
ACGAM1PPpp	h2o[p] + acgam1p[p] -> acgam[p] + pi[p]	"	N-acetyl-D-glucosamine 1-phosphatase (periplasm)	Alternate Carbon Metabolism	0	0	1000	0				Added by GapFill
ACGAM1Ptex	acgam1p[e] <=> acgam1p[p]	ECOLC_RS17950 or ECOLC_RS14330 or ECOLC_RS12200 or ECOLC_RS07685	N-acetyl-D-glucosamine 1-phosphate transport via diffusion (extracellular to periplasm)	Transport, Outer Membrane Porin	1	-1000	1000	0				Added by GapFill
EX_acgam1p_e	acgam1p[e] ->	"	N-Acetyl-D-glucosamine 1-phosphate exchange	"	0	0	1000	0				Added by GapFill
GAMtex	gam[e] <=> gam[p]	ECOLC_RS17950 or ECOLC_RS14330 or ECOLC_RS12200 or ECOLC_RS07685	D-glucosamine transport via diffusion (extracellular to periplasm)	Transport, Outer Membrane Porin	1	-1000	1000	0				Added by GapFill
EX_gam_e	gam[e] ->	"	D-glucosamine exchange	"	0	0	1000	0				Added by GapFill
ALAt4pp	na1[p] + ala__L[p] -> ala__L[c] + na1[c]	ECOLC_RS19585	L-alanine transport in via sodium symport (periplasm)	Transport, Inner Membrane	0	0	1000	0				Added by GapFill
ALAtex	ala__L[e] <=> ala__L[p]	ECOLC_RS17950 or ECOLC_RS14330 or ECOLC_RS12200 or ECOLC_RS07685	L-alanine transport via diffusion (extracellular to periplasm)	Transport, Outer Membrane Porin	1	-1000	1000	0				Added by GapFill
EX_ala__L_e	ala__L[e] ->	"	L-Alanine exchange	"	0	0	1000	0				Added by GapFill
CAT	2 h2o2[c] -> o2[c] + 2 h2o[c]	ECOLC_RS10215 or ECOLC_RS21940	Catalase	Unassigned	0	0	1000	0				Added by GapFill
EX_enter_e	enter[e] ->	"	Enterochelin exchange	"	0	0	1000	0				Added by GapFill
FEENTERexs	enter[e] + fe3[e] -> feenter[e]	s0001	Enterobactin Fe(III) binding (spontaneous)	Inorganic Ion Transport and Metabolism	0	0	1000	0				Added by GapFill
FEENTERtonex	feenter[e] + h[p] -> h[c] + feenter[p]	ECOLC_RS16470 and (ECOLC_RS12725 and ECOLC_RS03670 and ECOLC_RS03665)	Fe-enterobactin transport via ton system (extracellular)	"	0	0	1000	0				Added by GapFill
FEENTERabcpp	atp[c] + feenter[p] + h2o[c] -> h[c] + adp[c] + pi[c] + feenter[c]	ECOLC_RS16425 and ECOLC_RS16445 and ECOLC_RS16435 and ECOLC_RS16440	Fe-enterobactin transport via ABC system (periplasm)	Inorganic Ion Transport and Metabolism	0	0	1000	0				Added by GapFill
FEENTERR1	fadh2[c] + 2 feenter[c] -> 2 h[c] + 2 fe2[c] + 2 enter[c] + fad[c]	"	Fe-enterobactin reduction (Fe(III)-unloading)	Inorganic Ion Transport and Metabolism	0	0	1000	0				Added by GapFill
FEENTERR2	fmnh2[c] + 2 feenter[c] -> 2 h[c] + 2 fe2[c] + fmn[c] + 2 enter[c]	"	Fe-enterobactin reduction (Fe(III)-unloading)	Inorganic Ion Transport and Metabolism	0	0	1000	0				Added by GapFill
FEENTERR3	rbflvrd[c] + 2 feenter[c] -> 2 h[c] + 2 fe2[c] + ribflv[c] + 2 enter[c]	"	Fe-enterobactin reduction (Fe(III)-unloading)	Inorganic Ion Transport and Metabolism	0	0	1000	0				Added by GapFill
DHBS	h[c] + atp[c] + 23dhb[c] -> 23dhba[c] + ppi[c]	ECOLC_RS16415	2,3-dihydroxybenzoate adenylate synthase	Cofactor and Prosthetic Group Biosynthesis	0	0	1000	0				Added by GapFill
DHBSH	h2o[c] + 23dhbzs[c] -> ser__L[c] + 23dhb[c]	"	2,3-dihydroxybenzoylserine hydrolase	Cofactor and Prosthetic Group Biosynthesis	0	0	1000	0				Added by GapFill
ENTCS	3 23dhba[c] + 3 seramp[c] -> 9 h[c] + 6 amp[c] + enter[c]	ECOLC_RS16475	Enterochelin synthase	Cofactor and Prosthetic Group Biosynthesis	0	0	1000	0				Added by GapFill
SERASr	h[c] + ser__L[c] + atp[c] <=> ppi[c] + seramp[c]	ECOLC_RS16455	(L-seryl)adenylate synthase	Cofactor and Prosthetic Group Biosynthesis	1	-1000	1000	0				Added by GapFill
FEENTERtex	h[p] + enter[p] -> h[c] + enter[e]	ECOLC_RS03520	Enterochelin transport (secretion periplasm)	Inorganic Ion Transport and Metabolism	0	0	1000	0				Added by GapFill
FEENTERtpp	h[p] + enter[c] -> h[c] + enter[p]	ECOLC_RS16430	Enterochelin transport (secretion)	Transport, Inner Membrane	0	0	1000	0				Added by GapFill
EX_slnt_e	slnt[e] <=>	"	Selenite exchange	"	1	-1000	1000	0				Added by GapFill
FRUtex	fru[e] <=> fru[p]	ECOLC_RS17950 or ECOLC_RS14330 or ECOLC_RS12200 or ECOLC_RS07685	D-fructose transport via diffusion (extracellular to periplasm)	Transport, Outer Membrane Porin	1	-1000	1000	0				Added by GapFill
EX_fru_e	fru[e] ->	"	D-Fructose exchange	"	0	0	1000	0				Added by GapFill
EX_mnl_e	mnl[e] ->	"	D-Mannitol exchange	"	0	0	1000	0				Added by GapFill
MNLtex	mnl[e] <=> mnl[p]	ECOLC_RS17950 or ECOLC_RS14330 or ECOLC_RS12200 or ECOLC_RS07685	Mannitol transport via diffusion (extracellular to periplasm)	Transport, Outer Membrane Porin	1	-1000	1000	0				Added by GapFill
M1PD	nad[c] + mnl1p[c] <=> h[c] + f6p[c] + nadh[c]	ECOLC_RS00585	Mannitol-1-phosphate 5-dehydrogenase	Alternate Carbon Metabolism	1	-1000	1000	0				Added by GapFill
SLNTtex	slnt[e] <=> slnt[p]	ECOLC_RS12200 or ECOLC_RS14330 or ECOLC_RS07685 or ECOLC_RS17950	Selenite transport via diffusion (extracellular to periplasm)	Transport, Outer Membrane Porin	1	-1000	1000	0				Added by GapFill
SELtex	sel[e] <=> sel[p]	ECOLC_RS12200 or ECOLC_RS14330 or ECOLC_RS07685 or ECOLC_RS17950	Selenate transport via diffusion (extracellular to periplasm)	Transport, Outer Membrane Porin	1	-1000	1000	0				Added by GapFill
EX_acmana_e	acmana[e] ->	"	N-Acetyl-D-mannosamine exchange	"	0	0	1000	0				Added by GapFill
ACMANAtex	acmana[e] <=> acmana[p]	ECOLC_RS17950 or ECOLC_RS14330 or ECOLC_RS12200 or ECOLC_RS07685	N-acetyl-D-mannosamine transport via diffusion (extracellular to periplasm)	Transport, Outer Membrane Porin	1	-1000	1000	0				Added by GapFill
ACMUMtex	acmum[e] -> acmum[p]	ECOLC_RS17950 or ECOLC_RS14330 or ECOLC_RS12200 or ECOLC_RS07685	N-acetylmuramate transport via diffusion (extracellular to periplasm)	Transport, Outer Membrane Porin	0	0	1000	0				Added by GapFill
EX_acmum_e	acmum[e] ->	"	N-Acetylmuramate exchange	"	0	0	1000	0				Added by GapFill
EX_cellb_e	cellb[e] ->	"	Cellobiose exchange	Exchange	0	0	1000	0				Added by GapFill
SELR	mql8[c] + sel[c] -> slnt[c] + h2o[c] + mqn8[c]	ECOLC_RS10970 and ECOLC_RS10965 and ECOLC_RS10960 and ECOLC_RS10955	Selenate reductase	Inorganic Ion Transport and Metabolism	0	0	1000	0				Added by GapFill
FOMETRi	h[c] + 5fthf[c] -> h2o[c] + methf[c]	ECOLC_RS04250	Aminomethyltransferase	Folate Metabolism	0	0	1000	0				Added by GapFill
2DGLCtex	2dglc[e] <=> 2dglc[p]	"	2-Deoxy-D-glucose transport via diffusion (extracellular)	"	1	-1000	1000	0				Added by GapFill
EX_2dglc_e	2dglc[e] ->	"	2-Deoxy-D-glucose exchange	"	0	0	1000	0				Added by GapFill
2DGLCtpp	2dglc[p] <=> 2dglc[c]	"	2-Deoxy-D-glucose reversible tranposrt (periplasm)	Transport, Inner Membrane	1	-1000	1000	0				Added by GapFill
2DOXG6PP	2doxg6p[c] + h2o[c] -> pi[c] + 2dglc[c]	"	2 deoxyglucose 6 phosphatase	"	0	0	1000	0				Added by GapFill
TREtex	tre[e] <=> tre[p]	ECOLC_RS17950 or ECOLC_RS14330 or ECOLC_RS12200 or ECOLC_RS07685	Trehalose transport via diffusion (extracellular to periplasm)	Transport, Outer Membrane Porin	1	-1000	1000	0				Added by GapFill
EX_tre_e	tre[e] ->	"	Trehalose exchange	"	0	0	1000	0				Added by GapFill
TRE6PH	h2o[c] + tre6p[c] -> glc__D[c] + g6p[c]	ECOLC_RS20290	Trehalose-6-phosphate hydrolase	Alternate Carbon Metabolism	0	0	1000	0				Added by GapFill
TRE6PP	h2o[c] + tre6p[c] -> pi[c] + tre[c]	ECOLC_RS09335	Trehalose-phosphatase	Alternate Carbon Metabolism	0	0	1000	0				Added by GapFill
TREH	tre[c] + h2o[c] -> 2 glc__D[c]	ECOLC_RS01040	Alpha,alpha-trehalase	Alternate Carbon Metabolism	0	0	1000	0				Added by GapFill
ARBTtex	arbt[e] -> arbt[p]	ECOLC_RS07685 or ECOLC_RS12200 or ECOLC_RS17950 or ECOLC_RS14330	Arbutin transport via diffusion (extracellular to periplasm)	Transport, Outer Membrane Porin	0	0	1000	0				Added by GapFill
EX_arbt_e	arbt[e] ->	"	Arbutin exchange	"	0	0	1000	0				Added by GapFill
ASCBtex	ascb__L[e] <=> ascb__L[p]	ECOLC_RS17950 or ECOLC_RS14330 or ECOLC_RS12200 or ECOLC_RS07685	L-ascorbate transport via diffusion (extracellular to periplasm)	Transport, Outer Membrane Porin	1	-1000	1000	0				Added by GapFill
ASCBPL	ascb6p[c] + h2o[c] -> h[c] + 3dhgulnp[c]	ECOLC_RS20550	L-ascorbate 6-phosphate lactonase	Alternate Carbon Metabolism	0	0	1000	0				Added by GapFill
KG6PDC	h[c] + 3dhgulnp[c] -> xu5p__L[c] + co2[c]	ECOLC_RS20530 or ECOLC_RS00690	3-keto-L-gulonate 6-phosphate decarboxylase	Alternate Carbon Metabolism	0	0	1000	0				Added by GapFill
X5PL3E	xu5p__L[c] -> ru5p__L[c]	ECOLC_RS20525	L-xylulose 5-phosphate 3-epimerase	Alternate Carbon Metabolism	0	0	1000	0				Added by GapFill
RBP4E	ru5p__L[c] <=> xu5p__D[c]	ECOLC_RS20520 or ECOLC_RS00680 or ECOLC_RS19305	L-ribulose-phosphate 4-epimerase	Alternate Carbon Metabolism	1	-1000	1000	0				Added by GapFill
BGLA1	6pgg[c] + h2o[c] -> glc__D[c] + g6p[c]	"	6-phospho-beta-glucosidase	"	0	0	1000	0				Added by GapFill
CHTBStex	chtbs[e] <=> chtbs[p]	ECOLC_RS07685 or ECOLC_RS14330 or ECOLC_RS12200 or ECOLC_RS17950	Chitobiose transport via diffusion (extracellular to periplasm)	Transport, Outer Membrane Porin	1	-1000	1000	0				Added by GapFill
EX_chtbs_e	chtbs[e] ->	"	Chitobiose exchange	"	0	0	1000	0				Added by GapFill
DC6PH	h2o[c] + chtbs6p[c] -> acgam[c] + acgam6p[c]	ECOLC_RS10205	Diacetylchitobiose-6-phosphate hydrolase	Alternate Carbon Metabolism	0	0	1000	0				Added by GapFill
SLCYSS	acser[c] + tsul[c] -> ac[c] + scys__L[c]	"	O-acetyl-L-serine sulfhydrylase	Exchange	0	0	1000	0				Added by GapFill
SCYSSL	2 gthrd[c] + scys__L[c] -> cys__L[c] + h[c] + gthox[c] + so3[c]	"	S-sulfo-L-cysteine sulfite lyase	Cysteine Metabolism	0	0	1000	0				Added by GapFill
OMMBLHX3	nad[c] + 2 atp[c] + 3 h2o[c] + 2ommbl[c] -> 3 h[c] + 2 adp[c] + 2 pi[c] + 2omhmbl[c] + nadh[c]	ubiF	2-Octaprenyl-3-methyl-6-methoxy-1,4-benzoquinol hydroxylase (anaerobic)	Cofactor and Prosthetic Group Biosynthesis	0	0	1000	0				Added by GapFill
OMBZLM	amet[c] + 2ombzl[c] -> h[c] + ahcys[c] + 2ommbl[c]	ECOLC_RS22520	2-Octaprenyl-6-methoxy-benzoquinol methylase	Cofactor and Prosthetic Group Biosynthesis	0	0	1000	0				Added by GapFill
ACGAMK	atp[c] + acgam[c] -> h[c] + acgam6p[c] + adp[c]	ECOLC_RS13325	N-acetylglucosamine kinase	Murein Recycling	0	0	1000	0				Added by GapFill
GALTtex	galt[e] <=> galt[p]	ECOLC_RS17950 or ECOLC_RS14330 or ECOLC_RS12200 or ECOLC_RS07685	Galactitol transport via diffusion (extracellular to periplasm)	Transport, Outer Membrane Porin	1	-1000	1000	0				Added by GapFill
GLTPD	nad[c] + galt1p[c] <=> h[c] + tag6p__D[c] + nadh[c]	ECOLC_RS08325	Galactitol-1-phosphate dehydrogenase	Alternate Carbon Metabolism	1	-1000	1000	0				Added by GapFill
PFK_2	tag6p__D[c] + atp[c] -> h[c] + adp[c] + tagdp__D[c]	ECOLC_RS22100	Phosphofructokinase	"	0	0	1000	0				Added by GapFill
TGBPA	tagdp__D[c] <=> dhap[c] + g3p[c]	(ECOLC_RS03015 and ECOLC_RS02980) or (ECOLC_RS08305 and ECOLC_RS08300)	Tagatose-bisphosphate aldolase	Alternate Carbon Metabolism	1	-1000	1000	0				Added by GapFill
EX_man_e	man[e] ->	"	D-Mannose exchange	"	0	0	1000	0				Added by GapFill
HEX4	atp[c] + man[c] -> h[c] + adp[c] + man6p[c]	"	Hexokinase (D-mannose:ATP)	Alternate Carbon Metabolism	0	0	1000	0				Added by GapFill
MANtex	man[e] <=> man[p]	ECOLC_RS17950 or ECOLC_RS14330 or ECOLC_RS12200 or ECOLC_RS07685	D-mannose transport via diffusion (extracellular to periplasm)	Transport, Outer Membrane Porin	1	-1000	1000	0				Added by GapFill
MN6PP	h2o[c] + man6p[c] -> pi[c] + man[c]	ECOLC_RS15135	Mannose 6-phosphate phosphatase	Alternate Carbon Metabolism	0	0	1000	0				Added by GapFill
EX_sucr_e	sucr[e] ->	"	Sucrose exchange	"	0	0	1000	0				Added by GapFill
SUCRtex	sucr[e] <=> sucr[p]	ECOLC_RS17950 or ECOLC_RS14330 or ECOLC_RS12200 or ECOLC_RS07685	Sucrose transport transport via diffusion (extracellular to periplasm)	Transport, Outer Membrane Porin	1	-1000	1000	0				Added by GapFill
EX_malt_e	malt[e] ->	"	Maltose exchange	"	0	0	1000	0				Added by GapFill
MALTtexi	malt[e] -> malt[p]	ECOLC_RS21460	MaltoseMaltotriose transport via diffusion (extracellular to periplasm) irreversible	Transport, Outer Membrane	0	0	1000	0				Added by GapFill
EX_manglyc_e	manglyc[e] ->	"	2(alpha-D-Mannosyl)-D-glycerate exchange	"	0	0	1000	0				Added by GapFill
MANGLYCtex	manglyc[e] <=> manglyc[p]	ECOLC_RS17950 or ECOLC_RS14330 or ECOLC_RS12200 or ECOLC_RS07685	2-O-alpha-mannosyl-D-glycerate transport via diffusion (extracellular to periplasm)	Transport, Outer Membrane Porin	1	-1000	1000	0				Added by GapFill
EX_sbt__D_e	sbt__D[e] ->	"	D-Sorbitol exchange	"	0	0	1000	0				Added by GapFill
SBTtex	sbt__D[e] <=> sbt__D[p]	ECOLC_RS17950 or ECOLC_RS14330 or ECOLC_RS12200 or ECOLC_RS07685	D-sorbitol transport via diffusion (extracellular to periplasm)	Transport, Outer Membrane Porin	1	-1000	1000	0				Added by GapFill
SBTPD	nad[c] + sbt6p[c] <=> h[c] + f6p[c] + nadh[c]	ECOLC_RS05365	Sorbitol-6-phosphate dehydrogenase	Alternate Carbon Metabolism	1	-1000	1000	0				Added by GapFill
FRUK	f1p[c] + atp[c] -> h[c] + adp[c] + fdp[c]	ECOLC_RS07925	Fructose-1-phosphate kinase	Alternate Carbon Metabolism	0	0	1000	0				Added by GapFill
EX_mal__L_e	mal__L[e] ->	"	L-Malate exchange	"	0	0	1000	0				Added by Analysis Interest
MALtex	mal__L[e] <=> mal__L[p]	ECOLC_RS17950 or ECOLC_RS14330 or ECOLC_RS12200 or ECOLC_RS07685	Malate transport via diffusion (extracellular to periplasm)	Transport, Outer Membrane Porin	1	-1000	1000	0				Added by Analysis Interest
MALt2_2pp	2 h[p] + mal__L[p] -> 2 h[c] + mal__L[c]	ECOLC_RS00990	Malate transport via proton symport (2 H) (periplasm)	Transport, Inner Membrane	0	0	1000	0				Added by Analysis Interest
MALt3pp	h[p] + mal__L[c] -> h[c] + mal__L[p]	"	L-malate transport out via proton antiport (periplasm)	Transport, Inner Membrane	0	0	1000	0				Added by Analysis Interest

## Sheet: iAT1338
Abbreviation	Reaction	GPR	Description	SubSystem	Reversible	Lower bound	Upper bound	Objetive	Confidence Score	EC Number	KEGG ID	Notes
12DGR120tipp	12dgr120[p] -> 12dgr120[c]	"	1,2 diacylglycerol transport via flipping (periplasm to cytoplasm, n-C12:0)	Transport Inner Membrane	0	0	1000	0
12DGR140tipp	12dgr140[p] -> 12dgr140[c]	"	1,2 diacylglycerol transport via flipping (periplasm to cytoplasm, n-C14:0)	Transport Inner Membrane	0	0	1000	0
12DGR141tipp	12dgr141[p] -> 12dgr141[c]	"	1,2 diacylglycerol transport via flipping (periplasm to cytoplasm, n-C14:1)	Transport Inner Membrane	0	0	1000	0
12DGR160tipp	12dgr160[p] -> 12dgr160[c]	"	1,2 diacylglycerol transport via flipping (periplasm to cytoplasm, n-C16:0)	Transport Inner Membrane	0	0	1000	0
12DGR161tipp	12dgr161[p] -> 12dgr161[c]	"	1,2 diacylglycerol transport via flipping (periplasm to cytoplasm, n-C16:1)	Transport Inner Membrane	0	0	1000	0
12DGR180tipp	12dgr180[p] -> 12dgr180[c]	"	1,2 diacylglycerol transport via flipping (periplasm to cytoplasm, n-C18:0)	Transport Inner Membrane	0	0	1000	0
12DGR181tipp	12dgr181[p] -> 12dgr181[c]	"	1,2 diacylglycerol transport via flipping (periplasm to cytoplasm, n-C18:1)	Transport Inner Membrane	0	0	1000	0
12PPDRtex	12ppd__R[e] <=> 12ppd__R[p]	ECOLC_RS17950 or ECOLC_RS14330 or ECOLC_RS12200 or ECOLC_RS07685	(R)-Propane-1,2-diol transport via diffusion (extracellular to periplasm)	Transport Outer Membrane Porin	1	-1000	1000	0
12PPDRtpp	12ppd__R[p] <=> 12ppd__R[c]	"	(R)-Propane-1,2-diol facilitated transport (periplasm)	Transport Inner Membrane	1	-1000	1000	0
12PPDStex	12ppd__S[e] <=> 12ppd__S[p]	ECOLC_RS17950 or ECOLC_RS14330 or ECOLC_RS12200 or ECOLC_RS07685	(S)-Propane-1,2-diol transport via diffusion (extracellular to periplasm)	Transport Outer Membrane Porin	1	-1000	1000	0
12PPDStpp	12ppd__S[p] <=> 12ppd__S[c]	"	(S)-Propane-1,2-diol facilitated transport (periplasm)	Transport Inner Membrane	1	-1000	1000	0
13PPDH2	h[c] + 3hppnl[c] + nadph[c] <=> 13ppd[c] + nadp[c]	"	1,3-propanediol dehydrogenase	Alternate Carbon Metabolism	1	-1000	1000	0
14GLUCANabcpp	14glucan[p] + atp[c] + h2o[c] -> h[c] + adp[c] + pi[c] + 14glucan[c]	ECOLC_RS21475 and ECOLC_RS21480 and ECOLC_RS21485 and ECOLC_RS21465	1,4-alpha-D-glucan transport via ABC system (periplasm)	Transport Inner Membrane	0	0	1000	0
14GLUCANtexi	14glucan[e] -> 14glucan[p]	ECOLC_RS21460	1,4-alpha-D-glucan transport via diffusion (extracellular to periplasm) irreversible	Transport Outer Membrane	0	0	1000	0
23CAMPtex	23camp[e] <=> 23camp[p]	ECOLC_RS17950 or ECOLC_RS14330 or ECOLC_RS12200 or ECOLC_RS07685	23cAMP transport via diffusion (extracellular to periplasm)	Transport Outer Membrane Porin	1	-1000	1000	0
23CCMPtex	23ccmp[e] <=> 23ccmp[p]	ECOLC_RS17950 or ECOLC_RS14330 or ECOLC_RS12200 or ECOLC_RS07685	23cCMP transport via diffusion (extracellular to periplasm)	Transport Outer Membrane Porin	1	-1000	1000	0
23CGMPtex	23cgmp[e] <=> 23cgmp[p]	ECOLC_RS17950 or ECOLC_RS14330 or ECOLC_RS12200 or ECOLC_RS07685	23cGMP transport via diffusion (extracellular to periplasm)	Transport Outer Membrane Porin	1	-1000	1000	0
23CUMPtex	23cump[e] <=> 23cump[p]	ECOLC_RS17950 or ECOLC_RS14330 or ECOLC_RS12200 or ECOLC_RS07685	23cUMP transport via diffusion (extracellular to periplasm)	Transport Outer Membrane Porin	1	-1000	1000	0
23DAPPAt2pp	h[p] + 23dappa[p] -> h[c] + 23dappa[c]	"	2,3-diaminopropionate transport in via proton symport	Transport Inner Membrane	0	0	1000	0
23DAPPAtex	23dappa[e] <=> 23dappa[p]	ECOLC_RS17950 or ECOLC_RS14330 or ECOLC_RS12200 or ECOLC_RS07685	2,3-diaminopropionate transport via diffusion	Transport Outer Membrane Porin	1	-1000	1000	0
23PDE2pp	h2o[p] + 23cump[p] -> h[p] + 3ump[p]	ECOLC_RS20400	2,3-cyclic-nucleotide phosphodiesterase (UMP) (periplasm)	Nucleotide Salvage Pathway	0	0	1000	0
23PDE4pp	h2o[p] + 23ccmp[p] -> h[p] + 3cmp[p]	ECOLC_RS20400	2,3-cyclic-nucleotide phosphodiesterase (CMP) (periplasm)	Nucleotide Salvage Pathway	0	0	1000	0
23PDE7pp	h2o[p] + 23camp[p] -> h[p] + 3amp[p]	ECOLC_RS20400	2,3-cyclic-nucleotide phosphodiesterase (AMP) (periplasm)	Nucleotide Salvage Pathway	0	0	1000	0
23PDE9pp	h2o[p] + 23cgmp[p] -> h[p] + 3gmp[p]	ECOLC_RS20400	2,3-cyclic-nucleotide phosphodiesterase (GMP) (periplasm)	Nucleotide Salvage Pathway	0	0	1000	0
26DAHtex	26dap__M[e] <=> 26dap__M[p]	ECOLC_RS17950 or ECOLC_RS14330 or ECOLC_RS12200 or ECOLC_RS07685	Meso-2,6-Diaminoheptanedioate transport via diffusion (extracellular to periplasm)	Transport Outer Membrane Porin	1	-1000	1000	0
2AGPA120tipp	2ddecg3p[p] -> 2ddecg3p[c]	ECOLC_RS04695	2-Acyl-sn-glycero-3-phosphatidate (n-C12:0) transporter via facilitated diffusion (periplasm)	Transport Inner Membrane	0	0	1000	0
2AGPA140tipp	2tdecg3p[p] -> 2tdecg3p[c]	ECOLC_RS04695	2-Acyl-sn-glycero-3-phosphatidate (n-C14:0) transporter via facilitated diffusion (periplasm)	Transport Inner Membrane	0	0	1000	0
2AGPA141tipp	2tdec7eg3p[p] -> 2tdec7eg3p[c]	ECOLC_RS04695	2-Acyl-sn-glycero-3-phosphatidate (n-C14:1) transporter via facilitated diffusion (periplasm)	Transport Inner Membrane	0	0	1000	0
2AGPA160tipp	2hdecg3p[p] -> 2hdecg3p[c]	ECOLC_RS04695	2-Acyl-sn-glycero-3-phosphatidate (n-C16:0) transporter via facilitated diffusion (periplasm)	Transport Inner Membrane	0	0	1000	0
2AGPA161tipp	2hdec9eg3p[p] -> 2hdec9eg3p[c]	ECOLC_RS04695	2-Acyl-sn-glycero-3-phosphatidate (n-C16:1) transporter via facilitated diffusion (periplasm)	Transport Inner Membrane	0	0	1000	0
2AGPA180tipp	2odecg3p[p] -> 2odecg3p[c]	ECOLC_RS04695	2-Acyl-sn-glycero-3-phosphatidate (n-C18:0) transporter via facilitated diffusion (periplasm)	Transport Inner Membrane	0	0	1000	0
2AGPA181tipp	2odec11eg3p[p] -> 2odec11eg3p[c]	ECOLC_RS04695	2-Acyl-sn-glycero-3-phosphatidate (n-C18:1) transporter via facilitated diffusion (periplasm)	Transport Inner Membrane	0	0	1000	0
2AGPE120tipp	2agpe120[p] -> 2agpe120[c]	ECOLC_RS04695	2-Acyl-sn-glycero-3-phosphoethanolamine (n-C12:0) transporter via facilitated diffusion (periplasm)	Transport Inner Membrane	0	0	1000	0
2AGPE140tipp	2agpe140[p] -> 2agpe140[c]	ECOLC_RS04695	2-Acyl-sn-glycero-3-phosphoethanolamine (n-C14:0) transporter via facilitated diffusion (periplasm)	Transport Inner Membrane	0	0	1000	0
2AGPE141tipp	2agpe141[p] -> 2agpe141[c]	ECOLC_RS04695	2-Acyl-sn-glycero-3-phosphoethanolamine (n-C14:1) transporter via facilitated diffusion (periplasm)	Transport Inner Membrane	0	0	1000	0
2AGPE160tipp	2agpe160[p] -> 2agpe160[c]	ECOLC_RS04695	2-Acyl-sn-glycero-3-phosphoethanolamine (n-C16:0) transporter via facilitated diffusion (periplasm)	Transport Inner Membrane	0	0	1000	0
2AGPE161tipp	2agpe161[p] -> 2agpe161[c]	ECOLC_RS04695	2-Acyl-sn-glycero-3-phosphoethanolamine (n-C16:1) transporter via facilitated diffusion (periplasm)	Transport Inner Membrane	0	0	1000	0
2AGPE180tipp	2agpe180[p] -> 2agpe180[c]	ECOLC_RS04695	2-Acyl-sn-glycero-3-phosphoethanolamine (n-C18:0) transporter via facilitated diffusion (periplasm)	Transport Inner Membrane	0	0	1000	0
2AGPE181tipp	2agpe181[p] -> 2agpe181[c]	ECOLC_RS04695	2-Acyl-sn-glycero-3-phosphoethanolamine (n-C18:1) transporter via facilitated diffusion (periplasm)	Transport Inner Membrane	0	0	1000	0
2AGPEAT120	2agpe120[c] + atp[c] + ddca[c] -> pe120[c] + ppi[c] + amp[c]	ECOLC_RS04690	2-acyl-glycerophospho-ethanolamine acyltransferase (n-C12:0)	Glycerophospholipid Metabolism	0	0	1000	0
2AGPEAT140	2agpe140[c] + atp[c] + ttdca[c] -> ppi[c] + pe140[c] + amp[c]	ECOLC_RS04690	2-acyl-glycerophospho-ethanolamine acyltransferase (n-C14:0)	Glycerophospholipid Metabolism	0	0	1000	0
2AGPEAT141	atp[c] + ttdcea[c] + 2agpe141[c] -> pe141[c] + ppi[c] + amp[c]	ECOLC_RS04690	2-acyl-glycerophospho-ethanolamine acyltransferase (n-C14:1)	Glycerophospholipid Metabolism	0	0	1000	0
2AGPEAT160	atp[c] + 2agpe160[c] + hdca[c] -> ppi[c] + pe160[c] + amp[c]	ECOLC_RS04690	2-acyl-glycerophospho-ethanolamine acyltransferase (n-C16:0)	Glycerophospholipid Metabolism	0	0	1000	0
2AGPEAT161	hdcea[c] + atp[c] + 2agpe161[c] -> ppi[c] + pe161[c] + amp[c]	ECOLC_RS04690	2-acyl-glycerophospho-ethanolamine acyltransferase (n-C16:1)	Glycerophospholipid Metabolism	0	0	1000	0
2AGPEAT180	ocdca[c] + atp[c] + 2agpe180[c] -> ppi[c] + pe180[c] + amp[c]	ECOLC_RS04690	2-acyl-glycerophospho-ethanolamine acyltransferase (n-C18:0)	Glycerophospholipid Metabolism	0	0	1000	0
2AGPEAT181	ocdcea[c] + atp[c] + 2agpe181[c] -> pe181[c] + ppi[c] + amp[c]	ECOLC_RS04690	2-acyl-glycerophospho-ethanolamine acyltransferase (n-C18:1)	Glycerophospholipid Metabolism	0	0	1000	0
2AGPG120tipp	2agpg120[p] -> 2agpg120[c]	ECOLC_RS04695	2-Acyl-sn-glycero-3-phosphoglycerol (n-C12:0) transporter via facilitated diffusion (periplasm)	Transport Inner Membrane	0	0	1000	0
2AGPG140tipp	2agpg140[p] -> 2agpg140[c]	ECOLC_RS04695	2-Acyl-sn-glycero-3-phosphoglycerol (n-C14:0) transporter via facilitated diffusion (periplasm)	Transport Inner Membrane	0	0	1000	0
2AGPG141tipp	2agpg141[p] -> 2agpg141[c]	ECOLC_RS04695	2-Acyl-sn-glycero-3-phosphoglycerol (n-C14:1) transporter via facilitated diffusion (periplasm)	Transport Inner Membrane	0	0	1000	0
2AGPG160tipp	2agpg160[p] -> 2agpg160[c]	ECOLC_RS04695	2-Acyl-sn-glycero-3-phosphoglycerol (n-C16:0) transporter via facilitated diffusion (periplasm)	Transport Inner Membrane	0	0	1000	0
2AGPG161tipp	2agpg161[p] -> 2agpg161[c]	ECOLC_RS04695	2-Acyl-sn-glycero-3-phosphoglycerol (n-C16:1) transporter via facilitated diffusion (periplasm)	Transport Inner Membrane	0	0	1000	0
2AGPG180tipp	2agpg180[p] -> 2agpg180[c]	ECOLC_RS04695	2-Acyl-sn-glycero-3-phosphoglycerol (n-C18:0) transporter via facilitated diffusion (periplasm)	Transport Inner Membrane	0	0	1000	0
2AGPG181tipp	2agpg181[p] -> 2agpg181[c]	ECOLC_RS04695	2-Acyl-sn-glycero-3-phosphoglycerol (n-C18:1) transporter via facilitated diffusion (periplasm)	Transport Inner Membrane	0	0	1000	0
2AGPGAT120	2agpg120[c] + atp[c] + ddca[c] -> pg120[c] + ppi[c] + amp[c]	ECOLC_RS04690	2-acyl-glycerophospho-glycerol acyltransferase (n-C12:0)	Glycerophospholipid Metabolism	0	0	1000	0
2AGPGAT140	atp[c] + ttdca[c] + 2agpg140[c] -> ppi[c] + pg140[c] + amp[c]	ECOLC_RS04690	2-acyl-glycerophospho-glycerol acyltransferase (n-C14:0)	Glycerophospholipid Metabolism	0	0	1000	0
2AGPGAT141	atp[c] + 2agpg141[c] + ttdcea[c] -> ppi[c] + pg141[c] + amp[c]	ECOLC_RS04690	2-acyl-glycerophospho-glycerol acyltransferase (n-C14:1)	Glycerophospholipid Metabolism	0	0	1000	0
2AGPGAT160	atp[c] + 2agpg160[c] + hdca[c] -> ppi[c] + pg160[c] + amp[c]	ECOLC_RS04690	2-acyl-glycerophospho-glycerol acyltransferase (n-C16:0)	Glycerophospholipid Metabolism	0	0	1000	0
2AGPGAT161	hdcea[c] + atp[c] + 2agpg161[c] -> pg161[c] + ppi[c] + amp[c]	ECOLC_RS04690	2-acyl-glycerophospho-glycerol acyltransferase (n-C16:1)	Glycerophospholipid Metabolism	0	0	1000	0
2AGPGAT180	ocdca[c] + 2agpg180[c] + atp[c] -> ppi[c] + pg180[c] + amp[c]	ECOLC_RS04690	2-acyl-glycerophospho-glycerol acyltransferase (n-C18:0)	Glycerophospholipid Metabolism	0	0	1000	0
2AGPGAT181	ocdcea[c] + atp[c] + 2agpg181[c] -> ppi[c] + pg181[c] + amp[c]	ECOLC_RS04690	2-acyl-glycerophospho-glycerol acyltransferase (n-C18:1)	Glycerophospholipid Metabolism	0	0	1000	0
2DGLCtex	2dglc[e] <=> 2dglc[p]	"	2-Deoxy-D-glucose transport via diffusion (extracellular)	Transport Outer Membrane	1	-1000	1000	0
2DGULRGx	h[c] + 2dhguln[c] + nadh[c] -> nad[c] + glcn[c]	ECOLC_RS00845	2-Dehydro-L-gulonate reductase to gluconate (NADH)	Alternate Carbon Metabolism	0	0	1000	0
2DGULRGy	h[c] + 2dhguln[c] + nadph[c] -> glcn[c] + nadp[c]	ECOLC_RS00845	2-Dehydro-L-gulonate reductase to gluconate (NADPH)	Alternate Carbon Metabolism	0	0	1000	0
2DGULRx	h[c] + 2dhguln[c] + nadh[c] -> nad[c] + idon__L[c]	ECOLC_RS00845	2-dehydro-L-gulonate reductase (NADH)	Alternate Carbon Metabolism	0	0	1000	0
2DGULRy	h[c] + 2dhguln[c] + nadph[c] -> idon__L[c] + nadp[c]	ECOLC_RS00845	2-dehydro-L-gulonate reductase (NADPH)	Alternate Carbon Metabolism	0	0	1000	0
2DOXG6PP	2doxg6p[c] + h2o[c] -> pi[c] + 2dglc[c]	"	2 deoxyglucose 6 phosphatase	Alternate Carbon Metabolism	0	0	1000	0
2HESR	2 gthrd[c] + dtgcl[c] -> 2 mercpeth[c] + gthox[c]	"	2-hydroxyethyldisulfide reductase	Alternate Carbon Metabolism	0	0	1000	0
2HH24DDH	h2o[c] + 2hh24dd[c] -> 4h2kpi[c]	"	2hh24dd hydratase	4 hydroxyphenylacetate catabolism	0	0	1000	0
2HH24DDH1	h2o[c] + 2hh24dd[c] <=> 24dhhed[c]	"	"	Alternate Carbon Metabolism	1	-1000	1000	0
2HPTCOAT	2hptcoa[c] + h2o[c] -> 2hptcl[c] + coa[c]	"	2-hydroxycyclohepta-1,4,6-triene-1-carboxyl-CoA thioesterase	Alternate Carbon Metabolism	0	0	1000	0
2MAHMP	h2o[c] + 2mahmp[c] -> h[c] + 4ampm[c] + pi[c]	ECOLC_RS17035 or ECOLC_RS13255	2-Methyl-4-amino-5-hydroxymethylpyrimidine diphosphatase	Cofactor and Prosthetic Group Biosynthesis	0	0	1000	0
2PGtex	2pg[e] <=> 2pg[p]	"	D Glycerate 2 phosphate transport via diffusion extracellular to periplasm	Transport Outer Membrane Porin	1	-1000	1000	0
2PHACTE	h2o[c] + 2hphaccoa[c] -> coa[c] + 2hyoxplac[c]	ECOLC_RS12100	Phenylacetyl CoA thioesterase	S_Aromatic_Acid_Breakdown	0	0	1000	0
34DHALDD	h2o[c] + nad[c] + 34dhpac[c] -> nadh[c] + 2 h[c] + 34dhpha[c]	ECOLC_RS12155	Aldehyde dehydrogenase 3 4 dihydroxyphenylacetaldehyde NAD	S_Aromatic_Acid_Breakdown	0	0	1000	0
34dhpactex	34dhpac[e] <=> 34dhpac[p]	ECOLC_RS17950 or ECOLC_RS14330 or ECOLC_RS12200 or ECOLC_RS07685	Dihydroxyphenylacetaldehyde transport via diffusion (extracellular to periplasm)	Transport Outer Membrane Porin	1	-1000	1000	0
34PHACTE	h2o[c] + 34dhphaccoa[c] -> coa[c] + 34dhpac[c]	ECOLC_RS12100	Phenylacetyl CoA thioesterase	S_Aromatic_Acid_Breakdown	0	0	1000	0
35PHACTE	h2o[c] + 35dhphaccoa[c] -> coa[c] + 35dhpha[c]	ECOLC_RS12100	Phenylacetyl CoA thioesterase	S_Aromatic_Acid_Breakdown	0	0	1000	0
3AMACHYD	h[c] + h2o[c] + 3amac[c] -> nh4[c] + msa[c]	ECOLC_RS13895	3-aminoacrylate hydrolase	Nucleotide Salvage Pathway	0	0	1000	0
3AMPtex	3amp[e] <=> 3amp[p]	ECOLC_RS17950 or ECOLC_RS14330 or ECOLC_RS12200 or ECOLC_RS07685	3AMP transport via diffusion (extracellular to periplasm)	Transport Outer Membrane Porin	1	-1000	1000	0
3CMPtex	3cmp[e] <=> 3cmp[p]	ECOLC_RS17950 or ECOLC_RS14330 or ECOLC_RS12200 or ECOLC_RS07685	3CMP transport via diffusion (extracellular to periplasm)	Transport Outer Membrane Porin	1	-1000	1000	0
3GMPtex	3gmp[e] <=> 3gmp[p]	ECOLC_RS14330 or ECOLC_RS12200 or ECOLC_RS07685 or ECOLC_RS17950	3GMP transport via diffusion (extracellular to periplasm)	Transport Outer Membrane Porin	1	-1000	1000	0
3HAD100	3hdecACP[c] -> tdec2eACP[c] + h2o[c]	ECOLC_RS14205 or ECOLC_RS18705	3-hydroxyacyl-[acyl-carrier-protein] dehydratase (n-C10:0)	Cell Envelope Biosynthesis	0	0	1000	0
3HAD120	3hddecACP[c] -> h2o[c] + tddec2eACP[c]	ECOLC_RS18705 or ECOLC_RS14205	3-hydroxyacyl-[acyl-carrier-protein] dehydratase (n-C12:0)	Cell Envelope Biosynthesis	0	0	1000	0
3HAD121	3hcddec5eACP[c] -> t3c5ddeceACP[c] + h2o[c]	ECOLC_RS18705 or ECOLC_RS14205	3-hydroxyacyl-[acyl-carrier-protein] dehydratase (n-C12:1)	Cell Envelope Biosynthesis	0	0	1000	0
3HAD140	3hmrsACP[c] -> h2o[c] + tmrs2eACP[c]	ECOLC_RS14205 or ECOLC_RS18705	3-hydroxyacyl-[acyl-carrier-protein] dehydratase (n-C14:0)	Cell Envelope Biosynthesis	0	0	1000	0
3HAD141	3hcmrs7eACP[c] -> t3c7mrseACP[c] + h2o[c]	ECOLC_RS14205 or ECOLC_RS18705	3-hydroxyacyl-[acyl-carrier-protein] dehydratase (n-C14:1)	Cell Envelope Biosynthesis	0	0	1000	0
3HAD160	3hpalmACP[c] -> tpalm2eACP[c] + h2o[c]	ECOLC_RS14205 or ECOLC_RS18705	3-hydroxyacyl-[acyl-carrier-protein] dehydratase (n-C16:0)	Cell Envelope Biosynthesis	0	0	1000	0
3HAD161	3hcpalm9eACP[c] -> t3c9palmeACP[c] + h2o[c]	ECOLC_RS18705 or ECOLC_RS14205	3-hydroxyacyl-[acyl-carrier-protein] dehydratase (n-C16:1)	Cell Envelope Biosynthesis	0	0	1000	0
3HAD180	3hoctaACP[c] -> toctd2eACP[c] + h2o[c]	ECOLC_RS14205 or ECOLC_RS18705	3-hydroxyacyl-[acyl-carrier-protein] dehydratase (n-C18:0)	Cell Envelope Biosynthesis	0	0	1000	0
3HAD181	3hcvac11eACP[c] -> t3c11vaceACP[c] + h2o[c]	ECOLC_RS14205 or ECOLC_RS18705	3-hydroxyacyl-[acyl-carrier-protein] dehydratase (n-C18:1)	Cell Envelope Biosynthesis	0	0	1000	0
3HAD40	3haACP[c] -> h2o[c] + but2eACP[c]	ECOLC_RS14205 or ECOLC_RS18705	3-hydroxyacyl-[acyl-carrier-protein] dehydratase (n-C4:0)	Cell Envelope Biosynthesis	0	0	1000	0
3HAD60	3hhexACP[c] -> thex2eACP[c] + h2o[c]	ECOLC_RS14205 or ECOLC_RS18705	3-hydroxyacyl-[acyl-carrier-protein] dehydratase (n-C6:0)	Cell Envelope Biosynthesis	0	0	1000	0
3HAD80	3hoctACP[c] -> toct2eACP[c] + h2o[c]	ECOLC_RS14205 or ECOLC_RS18705	3-hydroxyacyl-[acyl-carrier-protein] dehydratase (n-C8:0)	Cell Envelope Biosynthesis	0	0	1000	0
3HBCOAHL	h2o[c] + 3hibutcoa[c] -> coa[c] + h[c] + 3hmp[c]	"	3-hydroxyisobutyryl-CoA hydrolase	#N/A	0	0	1000	0
3HBZCT	3hbzcoa[c] + h2o[c] -> 3hbz[c] + coa[c]	"	3-hydroxybenzoyl-CoA thioesterase	Lipopolysaccharide Biosynthesis / Recycling	0	0	1000	0
3HCINNMH	h[c] + o2[c] + 3hcinnm[c] + nadh[c] -> nad[c] + dhcinnm[c] + h2o[c]	ECOLC_RS17610	3-hydroxycinnamate hydroxylase	Alternate Carbon Metabolism	0	0	1000	0
3HOXPACt2pp	h[p] + 3hoxpac[p] -> h[c] + 3hoxpac[c]	"	HPA permease	S_Aromatic_Acid_Breakdown	0	0	1000	0
3HOXPACtex	3hoxpac[e] <=> 3hoxpac[p]	ECOLC_RS17950 or ECOLC_RS14330 or ECOLC_RS12200 or ECOLC_RS07685	3 hydroxyphenylacetic acid transport via diffusion extracellular to periplasm	S_Transport_Outer_Membrane_Porin	1	-1000	1000	0
3HPADHi	nad[c] + 3hppnl[c] + h2o[c] -> 2 h[c] + nadh[c] + 3hpp[c]	"	3-Hydroxypropanal Dehydrogenase	Alternate Carbon Metabolism	0	0	1000	0
3HPAOX	nadh[c] + h[c] + o2[c] + 3hoxpac[c] -> h2o[c] + nad[c] + 34dhpha[c]	"	HPA monooxygenase	S_Aromatic_Acid_Breakdown	0	0	1000	0
3HPPPNH	h[c] + o2[c] + 3hpppn[c] + nadh[c] -> dhpppn[c] + nad[c] + h2o[c]	ECOLC_RS17610	3-(3-hydroxy-phenyl)propionate hydroxylase	Alternate Carbon Metabolism	0	0	1000	0
3HPPtex	3hpp[e] <=> 3hpp[p]	ECOLC_RS12200 or ECOLC_RS14330 or ECOLC_RS07685 or ECOLC_RS17950	3-hydroxypropionate transport via diffusion (extracellular to periplasm)	Transport Outer Membrane Porin	1	-1000	1000	0
3HPPtpp	h[c] + 3hpp[c] -> h[p] + 3hpp[p]	"	3-hydroxypropionate transport via proton symport (periplasm)	Transport Inner Membrane	0	0	1000	0
3KGK	atp[c] + 3dhguln[c] -> h[c] + 3dhgulnp[c] + adp[c]	ECOLC_RS00695	3-keto-L-gulonate kinase	Alternate Carbon Metabolism	0	0	1000	0
3NTD2pp	h2o[p] + 3ump[p] -> uri[p] + pi[p]	ECOLC_RS20400	3-nucleotidase (UMP) (periplasm)	Nucleotide Salvage Pathway	0	0	1000	0
3NTD4pp	h2o[p] + 3cmp[p] -> cytd[p] + pi[p]	ECOLC_RS20400	3-nucleotidase (CMP) (periplasm)	Nucleotide Salvage Pathway	0	0	1000	0
3NTD7pp	h2o[p] + 3amp[p] -> adn[p] + pi[p]	ECOLC_RS20400	3-nucleotidase (AMP) (periplasm)	Nucleotide Salvage Pathway	0	0	1000	0
3NTD9pp	h2o[p] + 3gmp[p] -> gsn[p] + pi[p]	ECOLC_RS20400	3-nucleotidase (GMP) (periplasm)	Nucleotide Salvage Pathway	0	0	1000	0
3NTYROXDApp	h2o[p] + o2[p] + 3ntym[p] -> nh4[p] + h2o2[p] + 4h3npacald[p]	ECOLC_RS12150	3 Nitrotyramine oxygen oxidoreductase deaminating flavin containing periplasm	S_Aromatic_Acid_Breakdown	0	0	1000	0
3OAR100	h[c] + 3odecACP[c] + nadph[c] <=> nadp[c] + 3hdecACP[c]	ECOLC_RS13455	3-oxoacyl-[acyl-carrier-protein] reductase (n-C10:0)	Cell Envelope Biosynthesis	1	-1000	1000	0
3OAR120	h[c] + 3oddecACP[c] + nadph[c] <=> nadp[c] + 3hddecACP[c]	ECOLC_RS13455	3-oxoacyl-[acyl-carrier-protein] reductase (n-C12:0)	Cell Envelope Biosynthesis	1	-1000	1000	0
3OAR121	3ocddec5eACP[c] + h[c] + nadph[c] -> nadp[c] + 3hcddec5eACP[c]	ECOLC_RS13455	3-oxoacyl-[acyl-carrier-protein] reductase (n-C12:1)	Cell Envelope Biosynthesis	0	0	1000	0
3OAR140	h[c] + nadph[c] + 3omrsACP[c] <=> nadp[c] + 3hmrsACP[c]	ECOLC_RS13455	3-oxoacyl-[acyl-carrier-protein] reductase (n-C14:0)	Cell Envelope Biosynthesis	1	-1000	1000	0
3OAR141	h[c] + nadph[c] + 3ocmrs7eACP[c] -> nadp[c] + 3hcmrs7eACP[c]	ECOLC_RS13455	3-oxoacyl-[acyl-carrier-protein] reductase (n-C14:1)	Cell Envelope Biosynthesis	0	0	1000	0
3OAR160	h[c] + nadph[c] + 3opalmACP[c] <=> nadp[c] + 3hpalmACP[c]	ECOLC_RS13455	3-oxoacyl-[acyl-carrier-protein] reductase (n-C16:0)	Cell Envelope Biosynthesis	1	-1000	1000	0
3OAR161	h[c] + 3ocpalm9eACP[c] + nadph[c] -> 3hcpalm9eACP[c] + nadp[c]	ECOLC_RS13455	3-oxoacyl-[acyl-carrier-protein] reductase (n-C16:1)	Cell Envelope Biosynthesis	0	0	1000	0
3OAR180	h[c] + 3ooctdACP[c] + nadph[c] <=> 3hoctaACP[c] + nadp[c]	ECOLC_RS13455	3-oxoacyl-[acyl-carrier-protein] reductase (n-C18:0)	Cell Envelope Biosynthesis	1	-1000	1000	0
3OAR181	h[c] + 3ocvac11eACP[c] + nadph[c] -> nadp[c] + 3hcvac11eACP[c]	ECOLC_RS13455	3-oxoacyl-[acyl-carrier-protein] reductase (n-C18:1)	Cell Envelope Biosynthesis	0	0	1000	0
3OAR40	h[c] + actACP[c] + nadph[c] <=> nadp[c] + 3haACP[c]	ECOLC_RS13455	3-oxoacyl-[acyl-carrier-protein] reductase (n-C4:0)	Cell Envelope Biosynthesis	1	-1000	1000	0
3OAR60	3ohexACP[c] + h[c] + nadph[c] <=> nadp[c] + 3hhexACP[c]	ECOLC_RS13455	3-oxoacyl-[acyl-carrier-protein] reductase (n-C6:0)	Cell Envelope Biosynthesis	1	-1000	1000	0
3OAR80	h[c] + nadph[c] + 3ooctACP[c] <=> 3hoctACP[c] + nadp[c]	ECOLC_RS13455	3-oxoacyl-[acyl-carrier-protein] reductase (n-C8:0)	Cell Envelope Biosynthesis	1	-1000	1000	0
3OAS100	h[c] + ocACP[c] + malACP[c] -> 3odecACP[c] + co2[c] + ACP[c]	ECOLC_RS07145 or ECOLC_RS13445	3-oxoacyl-[acyl-carrier-protein] synthase (n-C10:0)	Cell Envelope Biosynthesis	0	0	1000	0
3OAS120	h[c] + dcaACP[c] + malACP[c] -> 3oddecACP[c] + co2[c] + ACP[c]	ECOLC_RS13445 or ECOLC_RS07145	3-oxoacyl-[acyl-carrier-protein] synthase (n-C12:0)	Cell Envelope Biosynthesis	0	0	1000	0
3OAS121	h[c] + cdec3eACP[c] + malACP[c] -> 3ocddec5eACP[c] + co2[c] + ACP[c]	ECOLC_RS07145	3-oxoacyl-[acyl-carrier-protein] synthase (n-C12:1)	Cell Envelope Biosynthesis	0	0	1000	0
3OAS140	h[c] + ddcaACP[c] + malACP[c] -> 3omrsACP[c] + co2[c] + ACP[c]	ECOLC_RS07145 or ECOLC_RS13445	3-oxoacyl-[acyl-carrier-protein] synthase (n-C14:0)	Cell Envelope Biosynthesis	0	0	1000	0
3OAS141	h[c] + cddec5eACP[c] + malACP[c] -> 3ocmrs7eACP[c] + co2[c] + ACP[c]	ECOLC_RS07145	3-oxoacyl-[acyl-carrier-protein] synthase (n-C14:1)	Cell Envelope Biosynthesis	0	0	1000	0
3OAS160	h[c] + malACP[c] + myrsACP[c] -> 3opalmACP[c] + co2[c] + ACP[c]	ECOLC_RS07145 or ECOLC_RS13445	3-oxoacyl-[acyl-carrier-protein] synthase (n-C16:0)	Cell Envelope Biosynthesis	0	0	1000	0
3OAS161	h[c] + tdeACP[c] + malACP[c] -> 3ocpalm9eACP[c] + co2[c] + ACP[c]	ECOLC_RS07145	3-oxoacyl-[acyl-carrier-protein] synthase (n-C16:1)	Cell Envelope Biosynthesis	0	0	1000	0
3OAS180	h[c] + malACP[c] + palmACP[c] -> 3ooctdACP[c] + co2[c] + ACP[c]	ECOLC_RS13445 or ECOLC_RS07145	3-oxoacyl-[acyl-carrier-protein] synthase (n-C18:0)	Cell Envelope Biosynthesis	0	0	1000	0
3OAS181	h[c] + hdeACP[c] + malACP[c] -> 3ocvac11eACP[c] + co2[c] + ACP[c]	ECOLC_RS13445	3-oxoacyl-[acyl-carrier-protein] synthase (n-C18:1)	Cell Envelope Biosynthesis	0	0	1000	0
3OAS60	h[c] + butACP[c] + malACP[c] -> 3ohexACP[c] + co2[c] + ACP[c]	ECOLC_RS13445 or ECOLC_RS07145	3-oxoacyl-[acyl-carrier-protein] synthase (n-C6:0)	Cell Envelope Biosynthesis	0	0	1000	0
3OAS80	h[c] + hexACP[c] + malACP[c] -> co2[c] + 3ooctACP[c] + ACP[c]	ECOLC_RS07145 or ECOLC_RS13445	3-oxoacyl-[acyl-carrier-protein] synthase (n-C8:0)	Cell Envelope Biosynthesis	0	0	1000	0
3OXCOAT	oxadpcoa[c] + coa[c] -> accoa[c] + succoa[c]	ECOLC_RS12095	3-oxoadipyl-CoA thiolase	Alternate Carbon Metabolism	0	0	1000	0
3PEPTabcpp	LalaDgluMdap[p] + atp[c] + h2o[c] -> h[c] + adp[c] + pi[c] + LalaDgluMdap[c]	ECOLC_RS12295 and ECOLC_RS12770 and ECOLC_RS12765 and ECOLC_RS12760 and ECOLC_RS12755	Tripeptide (LalaDgluMdap) transport via ABC system (periplasm)	Murein Recycling	0	0	1000	0
3PEPTtex	LalaDgluMdap[e] <=> LalaDgluMdap[p]	ECOLC_RS17950 or ECOLC_RS14330 or ECOLC_RS12200 or ECOLC_RS07685	LalaDgluMdap (tripeptide) transport via diffusion (extracellular to periplasm)	Transport Outer Membrane Porin	1	-1000	1000	0
3PGtex	3pg[e] <=> 3pg[p]	"	3 Phospho D glycerate transport via diffusion extracellular to periplasm	Transport Outer Membrane Porin	1	-1000	1000	0
3PHACOAOR	o2[c] + h2[c] + phaccoa[c] -> 3dhphaccoa[c]	(ECOLC_RS12140 and ECOLC_RS12135 and ECOLC_RS12130 and ECOLC_RS12125 and ECOLC_RS12120) or (ECOLC_RS12140 and ECOLC_RS12135 and ECOLC_RS12130 and ECOLC_RS12125)	Phenylacetyl CoA oxygenase/reductase	S_Aromatic_Acid_Breakdown	0	0	1000	0
3PHACTE	h2o[c] + 3hphaccoa[c] -> coa[c] + 3hoxpac[c]	ECOLC_RS12100	Phenylacetyl CoA thioesterase	S_Aromatic_Acid_Breakdown	0	0	1000	0
3SLAR	h[c] + sla[c] + nadh[c] -> nad[c] + dhps[c]	"	3-sulfolactaldehyde reductase	Alternate Carbon Metabolism	0	0	1000	0
3UMPtex	3ump[e] <=> 3ump[p]	ECOLC_RS17950 or ECOLC_RS14330 or ECOLC_RS12200 or ECOLC_RS07685	3UMP transport via diffusion (extracellular to periplasm)	Transport Outer Membrane Porin	1	-1000	1000	0
42A12BOOXpp	h2o[p] + o2[p] + dopa[p] -> nh4[p] + 34dhpac[p] + h2o2[p]	ECOLC_RS12150	4-(2-Aminoethyl)-1,2-benzenediol:oxygen oxidoreductase(deaminating)(flavin-containing)	Nitrogen Metabolism	0	0	1000	0
4ABZGLUH	h2o[c] + 4abzglu[c] <=> glu__L[c] + 4abz[c]	"	P-aminobenzoyl-glutamate hydrolase	Cofactor and Prosthetic Group Biosynthesis	1	-1000	1000	0
4ABZGLUtex	4abzglu[e] <=> 4abzglu[p]	"	P-aminobenzoyl glutamate transport via diffusion (extracellular to periplasm)	Transport Outer Membrane	1	-1000	1000	0
4ABZGLUtr	h[p] + 4abzglu[p] <=> h[c] + 4abzglu[c]	"	P-aminobenzoyl glutamate:H+ symporter	Transport Inner Membrane	1	-1000	1000	0
4H2KPILY	4h2kpi[c] -> sucsal[c] + pyr[c]	"	4h2kpi Lyase	4 hydroxyphenylacetate catabolism	0	0	1000	0
4H3NALDD	h2o[c] + nad[c] + 4h3npacald[c] -> nadh[c] + 2 h[c] + 4h3npac[c]	ECOLC_RS12155	Aldehyde dehydrogenase 4 hydroxy 3 nitrophenylacetaldehyde NAD	S_Aromatic_Acid_Breakdown	0	0	1000	0
4HALDD	h2o[c] + nad[c] + 4hoxpacd[c] -> nadh[c] + 2 h[c] + 4hphac[c]	ECOLC_RS12155	Aldehyde dehydrogenase 4 hydroxyphenylacetaldehyde NAD	S_Aromatic_Acid_Breakdown	0	0	1000	0
4HBZt3pp	h[p] + 4hbz[c] -> h[c] + 4hbz[p]	"	4-hydroxybenzoate transport out via antiporter	Transport Inner Membrane	0	0	1000	0
4HOXPACDtex	4hoxpacd[e] <=> 4hoxpacd[p]	ECOLC_RS17950 or ECOLC_RS14330 or ECOLC_RS12200 or ECOLC_RS07685	4-hydroxyphenylacetaldehyde transport via diffusion (extracellular to periplasm)	Transport Outer Membrane Porin	1	-1000	1000	0
4HOXPACMOF	o2[c] + fadh2[c] + 4hphac[c] -> fad[c] + h2o[c] + 34dhpha[c]	"	4 hydroxyphenylacetate 3 monooxygenase FADH2	4 hydroxyphenylacetate catabolism	0	0	1000	0
4HOXPACt2pp	h[p] + 4hphac[p] -> h[c] + 4hphac[c]	"	4 hydroxyphenylacetate transport in via proton symport periplasm	Transport Inner Membrane	0	0	1000	0
4HTHRA	4hthr[c] <=> gly[c] + gcald[c]	"	4-hydroxy-L-threonine aldolase	Glycine and Serine Metabolism	1	-1000	1000	0
4HTHRK	atp[c] + 4hthr[c] -> h[c] + adp[c] + phthr[c]	"	4-Hydroxy-L-threonine kinase	Cofactor and Prosthetic Group Biosynthesis	0	0	1000	0
4HTHRS	h2o[c] + phthr[c] -> pi[c] + 4hthr[c]	ECOLC_RS19605	4-Hydroxy-L-threonine synthase	Cofactor and Prosthetic Group Biosynthesis	0	0	1000	0
4HTHRtex	4hthr[e] <=> 4hthr[p]	"	4-hydroxy-L-threonine transport	Transport	1	-1000	1000	0
4HTHRtrpp	h[p] + 4hthr[p] <=> h[c] + 4hthr[c]	"	4-hydroxy-L-threonine transport	Transport Inner Membrane	1	-1000	1000	0
4PCP	LalaDgluMdapDala[c] + h2o[c] -> ala__D[c] + LalaDgluMdap[c]	ECOLC_RS13050	Tetrapeptide L,D-carboxypeptidase	Murein Recycling	0	0	1000	0
4PCPpp	h2o[p] + LalaDgluMdapDala[p] -> LalaDgluMdap[p] + ala__D[p]	"	Tetrapeptide L,D-carboxypeptidase (periplasm)	Murein Recycling	0	0	1000	0
4PEPTabcpp	atp[c] + h2o[c] + LalaDgluMdapDala[p] -> h[c] + adp[c] + pi[c] + LalaDgluMdapDala[c]	ECOLC_RS12775 and ECOLC_RS12770 and ECOLC_RS12765 and ECOLC_RS12760 and ECOLC_RS12755	Tetrapeptide (LalaDgluMdapDala) transport via ABC system (periplasm)	Murein Recycling	0	0	1000	0
4PEPTtex	LalaDgluMdapDala[e] <=> LalaDgluMdapDala[p]	ECOLC_RS17950 or ECOLC_RS14330 or ECOLC_RS12200 or ECOLC_RS07685	LalaDgluMdapDala (pentapeptide) transport via diffusion (extracellular to periplasm)	Transport Outer Membrane Porin	1	-1000	1000	0
4PHACTE	h2o[c] + hphaccoa[c] -> coa[c] + 4hphac[c]	ECOLC_RS12100	Phenylacetyl CoA thioesterase	S_Aromatic_Acid_Breakdown	0	0	1000	0
5DGLCNt2rpp	h[p] + 5dglcn[p] <=> h[c] + 5dglcn[c]	"	5-Dehydro-D-gluconate transport via proton symport, reversible (periplasm)	Transport	1	-1000	1000	0
5DGLCNtex	5dglcn[e] <=> 5dglcn[p]	ECOLC_RS17950 or ECOLC_RS14330 or ECOLC_RS07685 or ECOLC_RS12200	5-Dehydro-D-gluconate transport via diffusion (extracellular to periplasm)	Transport Outer Membrane Porin	1	-1000	1000	0
5DKGR	nad[c] + glcn[c] <=> h[c] + 5dglcn[c] + nadh[c]	"	5-keto-D-gluconate 5-reductase	Alternate Carbon Metabolism	1	-1000	1000	0
5DOAN	dad_5[c] + h2o[c] -> 5drib[c] + ade[c]	ECOLC_RS18805	5-deoxyadenosine nuclosidase	Cofactor and Prosthetic Group Biosynthesis	0	0	1000	0
5MTRtex	5mtr[e] <=> 5mtr[p]	ECOLC_RS12200 or ECOLC_RS14330 or ECOLC_RS07685 or ECOLC_RS17950	5-Methylthio-D-ribose transport via proton diffusion (extracellular to periplasm)	Transport Outer Membrane Porin	1	-1000	1000	0
5MTRtpp	h[c] + 5mtr[c] -> 5mtr[p] + h[p]	"	5-Methylthio-D-ribose transport via proton symport (periplasm)	Transport Inner Membrane	0	0	1000	0
6APAt1	6apa[e] <=> 6apa[p]	ECOLC_RS17950 or ECOLC_RS14330 or ECOLC_RS12200 or ECOLC_RS07685	6 aminopenicillanic acid transport via outer membrane porin	S_penicillin_breakdown	1	-1000	1000	0
A5PISO	ru5p__D[c] <=> ara5p[c]	ECOLC_RS02675 or ECOLC_RS05350	Arabinose-5-phosphate isomerase	Alternate Carbon Metabolism	1	-1000	1000	0
AACPS1	atp[c] + ttdca[c] + ACP[c] -> ppi[c] + myrsACP[c] + amp[c]	ECOLC_RS04690 and ECOLC_RS13450	Acyl-[acyl-carrier-protein] synthetase (n-C14:0)	Cell Envelope Biosynthesis	0	0	1000	0
AACPS2	atp[c] + ttdcea[c] + ACP[c] -> tdeACP[c] + ppi[c] + amp[c]	ECOLC_RS04690 and ECOLC_RS13450	Acyl-[acyl-carrier-protein] synthetase (n-C14:1)	Cell Envelope Biosynthesis	0	0	1000	0
AACPS3	atp[c] + hdca[c] + ACP[c] -> ppi[c] + amp[c] + palmACP[c]	ECOLC_RS04690 and ECOLC_RS13450	Acyl-[acyl-carrier-protein] synthetase (n-C16:0)	Cell Envelope Biosynthesis	0	0	1000	0
AACPS4	hdcea[c] + atp[c] + ACP[c] -> hdeACP[c] + ppi[c] + amp[c]	ECOLC_RS04690 and ECOLC_RS13450	Acyl-[acyl-carrier-protein] synthetase (n-C16:1)	Cell Envelope Biosynthesis	0	0	1000	0
AACPS5	ocdcea[c] + atp[c] + ACP[c] -> ppi[c] + octeACP[c] + amp[c]	ECOLC_RS04690 and ECOLC_RS13450	Acyl-[acyl-carrier-protein] synthetase (n-C18:1)	Cell Envelope Biosynthesis	0	0	1000	0
AACPS6	ocdca[c] + atp[c] + ACP[c] -> ppi[c] + ocdcaACP[c] + amp[c]	ECOLC_RS04690 and ECOLC_RS13450	Acyl-[acyl-carrier-protein] synthetase (n-C18:0)	Cell Envelope Biosynthesis	0	0	1000	0
AACPS7	atp[c] + ddca[c] + ACP[c] -> ppi[c] + ddcaACP[c] + amp[c]	ECOLC_RS04690 and ECOLC_RS13450	Acyl-[acyl-carrier-protein] synthetase (n-C12:0)	Cell Envelope Biosynthesis	0	0	1000	0
AACPS8	dca[c] + atp[c] + ACP[c] -> ppi[c] + dcaACP[c] + amp[c]	ECOLC_RS04690 and ECOLC_RS13450	Acyl-[acyl-carrier-protein] synthetase (n-C10:0)	Cell Envelope Biosynthesis	0	0	1000	0
AACPS9	octa[c] + atp[c] + ACP[c] -> ocACP[c] + ppi[c] + amp[c]	ECOLC_RS04690 and ECOLC_RS13450	Acyl-[acyl-carrier-protein] synthetase (n-C8:0)	Cell Envelope Biosynthesis	0	0	1000	0
AACTOOR	o2[c] + aact[c] + h2o[c] -> nh4[c] + mthgxl[c] + h2o2[c]	"	Aminoacetone:oxygen oxidoreductase(deaminating)(flavin-containing)	Methylglyoxal Metabolism	0	0	1000	0
AADDGT	unagamu[c] + dtdp4aaddg[c] -> h[c] + unagamuf[c] + dtdp[c]	ECOLC_RS22725	DTDP-N-4-acetamido-4,6-dideoxy-D-galactose transferase	Cell Envelope Biosynthesis	0	0	1000	0
AAMYL	14glucan[c] -> malthx[c]	ECOLC_RS09180	Alpha-amylase	Alternate Carbon Metabolism	0	0	1000	0
AAMYLpp	14glucan[p] -> malthx[p]	ECOLC_RS00745	Alpha-amylase (periplasm)	Alternate Carbon Metabolism	0	0	1000	0
AB6PGH	arbt6p[c] + h2o[c] -> g6p[c] + hqn[c]	ECOLC_RS04300	Arbutin 6-phosphate glucohydrolase	Alternate Carbon Metabolism	0	0	1000	0
ABTA	akg[c] + 4abut[c] -> glu__L[c] + sucsal[c]	ECOLC_RS05580 or ECOLC_RS12440	4-aminobutyrate transaminase	Arginine and Proline Metabolism	0	0	1000	0
ABUTD	nad[c] + 4abutn[c] + h2o[c] -> 2 h[c] + 4abut[c] + nadh[c]	ECOLC_RS11865	Aminobutyraldehyde dehydrogenase	Arginine and Proline Metabolism	0	0	1000	0
ABUTt2pp	h[p] + 4abut[p] -> h[c] + 4abut[c]	ECOLC_RS05575	4-aminobutyrate transport in via proton symport (periplasm)	Transport Inner Membrane	0	0	1000	0
ABUTtex	4abut[e] <=> 4abut[p]	ECOLC_RS17950 or ECOLC_RS14330 or ECOLC_RS12200 or ECOLC_RS07685	4-aminobutyrate transport via diffusion (extracellular to periplasm)	Transport Outer Membrane Porin	1	-1000	1000	0
ACACCT	accoa[c] + acac[c] -> ac[c] + aacoa[c]	ECOLC_RS07650 and ECOLC_RS07645	Acetyl-CoA:acetoacetyl-CoA transferase	Alternate Carbon Metabolism	0	0	1000	0
ACACT1r	2 accoa[c] <=> aacoa[c] + coa[c]	ECOLC_RS07635 or ECOLC_RS07055 or ECOLC_RS22470	Acetyl-CoA C-acetyltransferase	Membrane Lipid Metabolism	1	-1000	1000	0
ACACt2pp	h[p] + acac[p] <=> h[c] + acac[c]	ECOLC_RS07640	Acetoacetate transport via proton symport (periplasm)	Transport Inner Membrane	1	-1000	1000	0
ACACT2r	accoa[c] + btcoa[c] <=> 3ohcoa[c] + coa[c]	ECOLC_RS07055 or ECOLC_RS22470	Acetyl-CoA C-acyltransferase (butanoyl-CoA) (r)	Membrane Lipid Metabolism	1	-1000	1000	0
ACACT3r	accoa[c] + hxcoa[c] <=> 3oocoa[c] + coa[c]	ECOLC_RS07055 or ECOLC_RS22470	Acetyl-CoA C-acyltransferase (hexanoyl-CoA) (r)	Membrane Lipid Metabolism	1	-1000	1000	0
ACACT4r	accoa[c] + occoa[c] <=> 3odcoa[c] + coa[c]	ECOLC_RS07055 or ECOLC_RS22470	Acetyl-CoA C-acyltransferase (octanoyl-CoA) (r)	Membrane Lipid Metabolism	1	-1000	1000	0
ACACT5r	accoa[c] + dcacoa[c] <=> 3oddcoa[c] + coa[c]	ECOLC_RS07055 or ECOLC_RS22470	Acetyl-CoA C-acyltransferase (decanoyl-CoA) (r)	Membrane Lipid Metabolism	1	-1000	1000	0
ACACT6r	accoa[c] + ddcacoa[c] <=> 3otdcoa[c] + coa[c]	ECOLC_RS07055 or ECOLC_RS22470	Acetyl-CoA C-acyltransferase (dodecanoyl-CoA) (r)	Membrane Lipid Metabolism	1	-1000	1000	0
ACACT7r	accoa[c] + tdcoa[c] <=> 3ohdcoa[c] + coa[c]	ECOLC_RS07055 or ECOLC_RS22470	Acetyl-CoA C-acyltransferase (tetradecanoyl-CoA) (r)	Membrane Lipid Metabolism	1	-1000	1000	0
ACACT8r	3ohodcoa[c] + coa[c] <=> accoa[c] + pmtcoa[c]	ECOLC_RS07055 or ECOLC_RS22470	Acetyl-CoA acyltransferase (hexadecanoyl-CoA), (r)	Membrane Lipid Metabolism	1	-1000	1000	0
ACACtex	acac[e] <=> acac[p]	ECOLC_RS17950 or ECOLC_RS14330 or ECOLC_RS12200 or ECOLC_RS07685	Acetoacetate transport via diffusion (extracellular to periplasm)	Transport Outer Membrane Porin	1	-1000	1000	0
ACALD	nad[c] + coa[c] + acald[c] <=> h[c] + accoa[c] + nadh[c]	ECOLC_RS17590 or ECOLC_RS12785	Acetaldehyde dehydrogenase (acetylating)	Pyruvate Metabolism	1	-1000	1000	0
ACALDtex	acald[e] <=> acald[p]	ECOLC_RS17950 or ECOLC_RS14330 or ECOLC_RS12200 or ECOLC_RS07685	Acetaldehyde transport via diffusion (extracellular to periplasm)	Transport Outer Membrane Porin	1	-1000	1000	0
ACALDtpp	acald[p] <=> acald[c]	s0001	Acetaldehyde reversible transport (periplasm)	Transport Inner Membrane	1	-1000	1000	0
ACANTHAT	accoa[c] + anth[c] -> acanth[c] + coa[c]	ECOLC_RS11745	Acetyl-CoA:anthranilate acetyltransferase	Tyrosine Tryptophan and Phenylalanine Metabolism	0	0	1000	0
ACBIPGT	h[c] + gtp[c] + adocbip[c] -> agdpcbi[c] + ppi[c]	ECOLC_RS08735	Adenosyl cobinamide phosphate guanyltransferase	Cofactor and Prosthetic Group Biosynthesis	0	0	1000	0
ACCOAC	accoa[c] + atp[c] + hco3[c] -> h[c] + adp[c] + pi[c] + malcoa[c]	ECOLC_RS18680 and ECOLC_RS07180 and ECOLC_RS02405 and ECOLC_RS02400	Acetyl-CoA carboxylase	Membrane Lipid Metabolism	0	0	1000	0
ACCOAL	atp[c] + ppa[c] + coa[c] -> adp[c] + pi[c] + ppcoa[c]	ECOLC_RS21285	Acetate-CoA ligase (ADP-forming)	Alternate Carbon Metabolism	0	0	1000	0
ACGAL1PPpp	h2o[p] + acgal1p[p] -> acgal[p] + pi[p]	"	N-acetyl-D-galactosamine 1-phosphatase (periplasm)	Alternate Carbon Metabolism	0	0	1000	0
ACGAL1Ptex	acgal1p[e] <=> acgal1p[p]	ECOLC_RS17950 or ECOLC_RS14330 or ECOLC_RS12200 or ECOLC_RS07685	N-acetyl-D-galactosamine 1-phosphate transport via diffusion (extracellular to periplasm)	Transport Outer Membrane Porin	1	-1000	1000	0
ACGAL6PI	acgal6p[c] -> tag6p__D[c]	"	Galactosamine-6-phosphate isomerase	Alternate Carbon Metabolism	0	0	1000	0
ACGAL6PISO	h2o[c] + acgal6p[c] -> nh4[c] + galam6p[c]	ECOLC_RS02960	D Galactosamine 6 phosphate isomerase	S_Alternate_Carbon_source	0	0	1000	0
ACGALptspp	acgal[p] + pep[c] -> pyr[c] + acgal6p[c]	"	N-Acetyl-D-galactosamine transport via PEP:Pyr PTS (periplasm)	Transport Inner Membrane	0	0	1000	0
ACGALtex	acgal[e] <=> acgal[p]	ECOLC_RS17950 or ECOLC_RS14330 or ECOLC_RS12200 or ECOLC_RS07685	N-acetyl-D-galactosamine transport via diffusion (extracellular to periplasm)	Transport Outer Membrane Porin	1	-1000	1000	0
ACGAM1PPpp	h2o[p] + acgam1p[p] -> acgam[p] + pi[p]	"	N-acetyl-D-glucosamine 1-phosphatase (periplasm)	Alternate Carbon Metabolism	0	0	1000	0
ACGAM1Ptex	acgam1p[e] <=> acgam1p[p]	ECOLC_RS17950 or ECOLC_RS14330 or ECOLC_RS12200 or ECOLC_RS07685	N-acetyl-D-glucosamine 1-phosphate transport via diffusion (extracellular to periplasm)	Transport Outer Membrane Porin	1	-1000	1000	0
ACGAMK	atp[c] + acgam[c] -> h[c] + acgam6p[c] + adp[c]	ECOLC_RS13325	N-acetylglucosamine kinase	Murein Recycling	0	0	1000	0
ACGAMT	uacgam[c] + udcpp[c] -> ump[c] + unaga[c]	ECOLC_RS22770	UDP-N-acetylglucosamine:undecaprenylphosphate N-acetylglucosamine -1-phosphate transferase	Cell Envelope Biosynthesis	0	0	1000	0
ACGAptspp	pep[c] + acgam[p] -> acgam6p[c] + pyr[c]	(ECOLC_RS06760 and ECOLC_RS13415 and ECOLC_RS06770 and ECOLC_RS06765) or (ECOLC_RS16005 and ECOLC_RS06770 and ECOLC_RS06765)	N-Acetyl-D-glucosamine transport via PEP:Pyr PTS (periplasm)	Transport Inner Membrane	0	0	1000	0
ACGAtex	acgam[e] <=> acgam[p]	ECOLC_RS17950 or ECOLC_RS14330 or ECOLC_RS12200 or ECOLC_RS07685	N-Acetyl-D-glucosamine transport via diffusion (extracellular to periplasm)	Transport Outer Membrane Porin	1	-1000	1000	0
ACGK	atp[c] + acglu[c] -> adp[c] + acg5p[c]	ECOLC_RS21855	Acetylglutamate kinase	Arginine and Proline Metabolism	0	0	1000	0
ACGS	accoa[c] + glu__L[c] -> h[c] + acglu[c] + coa[c]	ECOLC_RS04790	N-acetylglutamate synthase	Arginine and Proline Metabolism	0	0	1000	0
ACHBS	h[c] + 2obut[c] + pyr[c] -> 2ahbut[c] + co2[c]	(ECOLC_RS00165 and ECOLC_RS00160) or (ECOLC_RS19220 and ECOLC_RS19215)	2-aceto-2-hydroxybutanoate synthase	Valine Leucine and Isoleucine Metabolism	0	0	1000	0
ACKr	ac[c] + atp[c] <=> actp[c] + adp[c]	ECOLC_RS03095 or ECOLC_RS07280 or ECOLC_RS09570	Acetate kinase	Pyruvate Metabolism	1	-1000	1000	0
ACLS	h[c] + 2 pyr[c] -> alac__S[c] + co2[c]	(ECOLC_RS00165 and ECOLC_RS00160) or (ECOLC_RS19220 and ECOLC_RS19215)	Acetolactate synthase	Valine Leucine and Isoleucine Metabolism	0	0	1000	0
ACM6PH	acmum6p[c] + h2o[c] -> acgam6p[c] + lac__D[c]	ECOLC_RS06710	N-acetylmuramate 6-phosphate hydrolase	Alternate Carbon Metabolism	0	0	1000	0
ACMAMUT	uacmamu[c] + unaga[c] -> h[c] + unagamu[c] + udp[c]	ECOLC_RS22715	UDP-N-acetyl-D-mannosaminuronic acid transferase	Cell Envelope Biosynthesis	0	0	1000	0
ACMANAptspp	pep[c] + acmana[p] -> acmanap[c] + pyr[c]	"	N-acetyl-D-mannosamine transport via PTS (periplasm)	Transport Inner Membrane	0	0	1000	0
ACMANAtex	acmana[e] <=> acmana[p]	ECOLC_RS17950 or ECOLC_RS14330 or ECOLC_RS12200 or ECOLC_RS07685	N-acetyl-D-mannosamine transport via diffusion (extracellular to periplasm)	Transport Outer Membrane Porin	1	-1000	1000	0
ACMUMptspp	pep[c] + acmum[p] -> acmum6p[c] + pyr[c]	ECOLC_RS06760 and ECOLC_RS06705 and ECOLC_RS06770 and ECOLC_RS06765	N-acetylmuramate transport via PEP:Pyr PTS (periplasm)	Transport Inner Membrane	0	0	1000	0
ACMUMtex	acmum[e] -> acmum[p]	ECOLC_RS17950 or ECOLC_RS14330 or ECOLC_RS12200 or ECOLC_RS07685	N-acetylmuramate transport via diffusion (extracellular to periplasm)	Transport Outer Membrane Porin	0	0	1000	0
ACNAMt2pp	acnam[p] + h[p] -> h[c] + acnam[c]	ECOLC_RS02565	N-acetylneuraminate proton symport (periplasm)	Transport Inner Membrane	0	0	1000	0
ACNAMtex	acnam[e] <=> acnam[p]	deleted or ECOLC_RS14330 or ECOLC_RS07685	N-acetylneuraminate transport via diffusion (extracellular to periplasm)	Transport Outer Membrane	1	-1000	1000	0
ACNML	acnam[c] -> acmana[c] + pyr[c]	ECOLC_RS02560	N-Acetylneuraminate lyase	Alternate Carbon Metabolism	0	0	1000	0
ACOAD1f	btcoa[c] + fad[c] <=> fadh2[c] + b2coa[c]	ECOLC_RS18245	Acyl-CoA dehydrogenase (butanoyl-CoA)	Membrane Lipid Metabolism	1	-1000	1000	0
ACOAD2f	hxcoa[c] + fad[c] <=> fadh2[c] + hx2coa[c]	ECOLC_RS18245	Acyl-CoA dehydrogenase (hexanoyl-CoA)	Membrane Lipid Metabolism	1	-1000	1000	0
ACOAD3f	occoa[c] + fad[c] <=> fadh2[c] + oc2coa[c]	ECOLC_RS18245	Acyl-CoA dehydrogenase (octanoyl-CoA)	Membrane Lipid Metabolism	1	-1000	1000	0
ACOAD4f	dcacoa[c] + fad[c] <=> fadh2[c] + dc2coa[c]	ECOLC_RS18245	Acyl-CoA dehydrogenase (decanoyl-CoA)	Membrane Lipid Metabolism	1	-1000	1000	0
ACOAD5f	ddcacoa[c] + fad[c] <=> fadh2[c] + dd2coa[c]	ECOLC_RS18245	Acyl-CoA dehydrogenase (dodecanoyl-CoA)	Membrane Lipid Metabolism	1	-1000	1000	0
ACOAD6f	tdcoa[c] + fad[c] <=> fadh2[c] + td2coa[c]	ECOLC_RS18245	Acyl-CoA dehydrogenase (tetradecanoyl-CoA)	Membrane Lipid Metabolism	1	-1000	1000	0
ACOAD7f	pmtcoa[c] + fad[c] <=> fadh2[c] + hdd2coa[c]	ECOLC_RS18245	Acyl-CoA dehydrogenase (hexadecanoyl-CoA)	Membrane Lipid Metabolism	1	-1000	1000	0
ACOAD8f	stcoa[c] + fad[c] <=> fadh2[c] + od2coa[c]	ECOLC_RS18245	Acyl-CoA dehydrogenase (octadecanoyl-CoA)	Membrane Lipid Metabolism	1	-1000	1000	0
ACOATA	accoa[c] + ACP[c] <=> acACP[c] + coa[c]	ECOLC_RS13450 and ECOLC_RS13465	Acetyl-CoA ACP transacylase	Membrane Lipid Metabolism	1	-1000	1000	0
ACODA	acorn[c] + h2o[c] -> ac[c] + orn[c]	ECOLC_RS21865	Acetylornithine deacetylase	Arginine and Proline Metabolism	0	0	1000	0
ACOLIPAabctex	atp[c] + acolipa[p] + h2o[c] -> h[c] + adp[c] + pi[c] + acolipa[e]	ECOLC_RS02660 and ECOLC_RS02655 and ECOLC_RS02665 and ECOLC_RS20180 and ECOLC_RS20175	Arabinose modified core oligosaccharide lipid A transport via ABC system (periplasm to extracellular)	Lipopolysaccharide Biosynthesis / Recycling	0	0	1000	0
ACONIs	acon__T[c] <=> acon__C[c]	s0001	Aconitate isomerase (spontaneous)	Unassigned	1	-1000	1000	0
ACONMT	amet[c] + acon__T[c] -> ahcys[c] + aconm[c]	ECOLC_RS11465	Trans-aconitate methyltransferase	Unassigned	0	0	1000	0
ACONTa	cit[c] <=> h2o[c] + acon__C[c]	ECOLC_RS19015 or ECOLC_RS12585	Aconitase (half-reaction A, Citrate hydro-lyase)	Citric Acid Cycle	1	-1000	1000	0
ACONTb	h2o[c] + acon__C[c] <=> icit[c]	ECOLC_RS19015 or ECOLC_RS12585	Aconitase (half-reaction B, Isocitrate hydro-lyase)	Citric Acid Cycle	1	-1000	1000	0
ACOTA	akg[c] + acorn[c] <=> acg5sa[c] + glu__L[c]	ECOLC_RS10130 or ECOLC_RS01870	Acetylornithine transaminase	Arginine and Proline Metabolism	1	-1000	1000	0
ACOXT	accoa[c] + oxa[c] <=> ac[c] + oxalcoa[c]	"	Acetyl-CoA:oxalate CoA-transferase	Membrane Lipid Metabolism	1	-1000	1000	0
ACPPAT120	h[c] + pi[c] + ddcaACP[c] -> ddcap[c] + ACP[c]	ECOLC_RS13450 and ECOLC_RS13470	Acyl-(acyl carrier protein):phosphate acyltransferase (C12:0)	Glycerophospholipid Metabolism	0	0	1000	0
ACPPAT140	h[c] + pi[c] + myrsACP[c] -> ttdcap[c] + ACP[c]	ECOLC_RS13450 and ECOLC_RS13470	Acyl-(acyl carrier protein):phosphate acyltransferase (C14:0)	Glycerophospholipid Metabolism	0	0	1000	0
ACPPAT141	h[c] + tdeACP[c] + pi[c] -> ttdceap[c] + ACP[c]	ECOLC_RS13450 and ECOLC_RS13470	Acyl-(acyl carrier protein):phosphate acyltransferase (C14:1)	Glycerophospholipid Metabolism	0	0	1000	0
ACPPAT160	h[c] + pi[c] + palmACP[c] -> hdcap[c] + ACP[c]	ECOLC_RS13450 and ECOLC_RS13470	Acyl-(acyl carrier protein):phosphate acyltransferase (C16:0)	Glycerophospholipid Metabolism	0	0	1000	0
ACPPAT161	h[c] + hdeACP[c] + pi[c] -> hdceap[c] + ACP[c]	ECOLC_RS13450 and ECOLC_RS13470	Acyl-(acyl carrier protein):phosphate acyltransferase (C16:1)	Glycerophospholipid Metabolism	0	0	1000	0
ACPPAT180	h[c] + pi[c] + ocdcaACP[c] -> ocdcap[c] + ACP[c]	ECOLC_RS13450 and ECOLC_RS13470	Acyl-(acyl carrier protein):phosphate acyltransferase (C18:0)	Glycerophospholipid Metabolism	0	0	1000	0
ACPPAT181	h[c] + pi[c] + octeACP[c] -> ocdceap[c] + ACP[c]	ECOLC_RS13450 and ECOLC_RS13470	Acyl-(acyl carrier protein):phosphate acyltransferase (C18:1)	Glycerophospholipid Metabolism	0	0	1000	0
ACPS1	apoACP[c] + coa[c] -> h[c] + pap[c] + ACP[c]	ECOLC_RS01285 or ECOLC_RS05990	Acyl-carrier protein synthase	Cofactor and Prosthetic Group Biosynthesis	0	0	1000	0
ACS	ac[c] + atp[c] + coa[c] -> accoa[c] + ppi[c] + amp[c]	ECOLC_RS21285	Acetyl-CoA synthetase	Pyruvate Metabolism	0	0	1000	0
ACSERtex	acser[e] <=> acser[p]	ECOLC_RS12200 or ECOLC_RS07685 or ECOLC_RS17950 or ECOLC_RS14330	O-Acetyl-L-serine transport via diffusion (extracellular to periplasm)	Transport Outer Membrane Porin	1	-1000	1000	0
ACSERtpp	acser[c] -> acser[p]	ECOLC_RS05905 or ECOLC_RS11395	O-Acetyl-L-serine export via facilitated transport	Transport Inner Membrane	0	0	1000	0
ACt2rpp	h[p] + ac[p] <=> h[c] + ac[c]	ECOLC_RS19570	Acetate reversible transport via proton symport (periplasm)	Transport Inner Membrane	1	-1000	1000	0
ACt4pp	na1[p] + ac[p] -> ac[c] + na1[c]	ECOLC_RS21295	Na+/Acetate symport (periplasm)	Transport Inner Membrane	0	0	1000	0
ACtex	ac[e] <=> ac[p]	ECOLC_RS17950 or ECOLC_RS14330 or ECOLC_RS12200 or ECOLC_RS07685	Acetate transport via diffusion (extracellular to periplasm)	Transport Outer Membrane Porin	1	-1000	1000	0
ADA	h[c] + adn[c] + h2o[c] -> nh4[c] + ins[c]	ECOLC_RS10785	Adenosine deaminase	Nucleotide Salvage Pathway	0	0	1000	0
ADCL	4adcho[c] -> h[c] + pyr[c] + 4abz[c]	ECOLC_RS13440	4-aminobenzoate synthase	Cofactor and Prosthetic Group Biosynthesis	0	0	1000	0
ADCS	chor[c] + gln__L[c] -> glu__L[c] + 4adcho[c]	ECOLC_RS01865 and ECOLC_RS09795	4-amino-4-deoxychorismate synthase	Cofactor and Prosthetic Group Biosynthesis	0	0	1000	0
ADD	h[c] + h2o[c] + ade[c] -> nh4[c] + hxan[c]	ECOLC_RS00190	Adenine deaminase	Nucleotide Salvage Pathway	0	0	1000	0
ADEt2rpp	h[p] + ade[p] <=> h[c] + ade[c]	ECOLC_RS00315 or ECOLC_RS23110	Adenine transport via proton symport (reversible) (periplasm)	Transport Inner Membrane	1	-1000	1000	0
ADEtex	ade[e] <=> ade[p]	ECOLC_RS17950 or ECOLC_RS14330 or ECOLC_RS12200 or ECOLC_RS07685	Adenine transport via diffusion (extracellular to periplasm)	Transport Outer Membrane Porin	1	-1000	1000	0
ADK1	atp[c] + amp[c] <=> 2 adp[c]	ECOLC_RS16895	Adenylate kinase	Nucleotide Salvage Pathway	1	-1000	1000	0
ADK3	gtp[c] + amp[c] <=> adp[c] + gdp[c]	ECOLC_RS16895	Adentylate kinase (GTP)	Nucleotide Salvage Pathway	1	-1000	1000	0
ADK4	itp[c] + amp[c] <=> adp[c] + idp[c]	ECOLC_RS16895	Adentylate kinase (ITP)	Nucleotide Salvage Pathway	1	-1000	1000	0
ADMDC	h[c] + amet[c] -> ametam[c] + co2[c]	ECOLC_RS19005	Adenosylmethionine decarboxylase	Arginine and Proline Metabolism	0	0	1000	0
ADNCYC	atp[c] -> ppi[c] + camp[c]	ECOLC_RS22655	Adenylate cyclase	Nucleotide Salvage Pathway	0	0	1000	0
ADNK1	atp[c] + adn[c] -> h[c] + adp[c] + amp[c]	ECOLC_RS16895	Adenosine kinase	Nucleotide Salvage Pathway	0	0	1000	0
ADNt2pp	h[p] + adn[p] <=> h[c] + adn[c]	ECOLC_RS03990 or ECOLC_RS06870	"	Transport Inner Membrane	1	-1000	1000	0
ADNtex	adn[e] <=> adn[p]	ECOLC_RS17310	Adenosine transport via diffusion (extracellular to periplasm)	Transport Outer Membrane	1	-1000	1000	0
ADNUC	adn[c] + h2o[c] -> rib__D[c] + ade[c]	rihC	Adenosine hydrolase	Alternate Carbon Metabolism	0	0	1000	0
ADOCBIK	atp[c] + adocbi[c] -> h[c] + adp[c] + adocbip[c]	ECOLC_RS08735	Adenosyl cobinamide kinase	Cofactor and Prosthetic Group Biosynthesis	0	0	1000	0
ADOCBLabcpp	atp[c] + adocbl[p] + h2o[c] -> h[c] + adocbl[c] + adp[c] + pi[c]	ECOLC_RS10320 and ECOLC_RS10330 and ECOLC_RS18810	Adenosylcobalamin transport via ABC system (periplasm)	Transport Inner Membrane	0	0	1000	0
ADOCBLPP	h2o[p] + adocblp[c] -> adocbl[c] + pi[p]	"	Adenosylcobalamin phosphate phosphatase	Cofactor and Prosthetic Group Biosynthesis	0	0	1000	0
ADOCBLPS	agdpcbi[c] + 5prdmbz[c] -> h[c] + gmp[c] + adocblp[c]	"	Adenosylcobalamin phosphate synthase	Cofactor and Prosthetic Group Biosynthesis	0	0	1000	0
ADOCBLS	agdpcbi[c] + rdmbzi[c] -> h[c] + adocbl[c] + gmp[c]	ECOLC_RS08740	Adenosylcobalamin 5-phosphate synthase	Cofactor and Prosthetic Group Biosynthesis	0	0	1000	0
ADOCBLtonex	adocbl[e] + h[p] -> h[c] + adocbl[p]	ECOLC_RS21820 and (ECOLC_RS12725 and ECOLC_RS03670 and ECOLC_RS03665)	Adenosylcobalimin transport via ton system (extermal)	Transport Outer Membrane	0	0	1000	0
ADPRDP	adprib[c] + h2o[c] -> 2 h[c] + r5p[c] + amp[c]	ECOLC_RS01685 or ECOLC_RS03525	ADPribose diphosphatase	Nucleotide Salvage Pathway	0	0	1000	0
ADPT	prpp[c] + ade[c] -> ppi[c] + amp[c]	ECOLC_RS16920	Adenine phosphoribosyltransferase	Nucleotide Salvage Pathway	0	0	1000	0
ADSK	atp[c] + aps[c] -> h[c] + adp[c] + paps[c]	ECOLC_RS05135	Adenylyl-sulfate kinase	Cysteine Metabolism	0	0	1000	0
ADSL1r	dcamp[c] <=> fum[c] + amp[c]	ECOLC_RS13270	Adenylsuccinate lyase	Purine and Pyrimidine Biosynthesis	1	-1000	1000	0
ADSL2r	25aics[c] <=> aicar[c] + fum[c]	ECOLC_RS13270	Adenylosuccinate lyase	Purine and Pyrimidine Biosynthesis	1	-1000	1000	0
ADSS	asp__L[c] + imp[c] + gtp[c] -> 2 h[c] + pi[c] + gdp[c] + dcamp[c]	ECOLC_RS20625	Adenylosuccinate synthase	Purine and Pyrimidine Biosynthesis	0	0	1000	0
AEPtex	2ameph[e] <=> 2ameph[p]	"	AEP transport via diffusion extracellular to periplasm	Transport Outer Membrane Porin	1	-1000	1000	0
AGDC	acgam6p[c] + h2o[c] -> ac[c] + gam6p[c]	ECOLC_RS16015	N-acetylglucosamine-6-phosphate deacetylase	Alternate Carbon Metabolism	0	0	1000	0
AGM3PA	anhgm3p[c] + h2o[c] -> anhgm[c] + LalaDgluMdap[c]	ECOLC_RS19055	N-Acetyl-D-glucosamine(anhydrous)N-Acetylmuramyl-tripeptide amidase	Murein Recycling	0	0	1000	0
AGM3PApp	h2o[p] + anhgm3p[p] -> LalaDgluMdap[p] + anhgm[p]	ECOLC_RS06670 or ECOLC_RS04795 or ECOLC_RS20665	N-Acetyl-D-glucosamine(anhydrous)N-Acetylmuramyl-tripeptide amidase (periplasm)	Murein Recycling	0	0	1000	0
AGM3PH	anhgm3p[c] + h2o[c] -> anhm3p[c] + acgam[c]	ECOLC_RS13385	N-Acetyl-D-glucosamine(anhydrous)N-Acetylmuramyl-tripeptide beta -1,4-N-acetylglucosaminidase	Murein Recycling	0	0	1000	0
AGM3Pt2pp	h[p] + anhgm3p[p] -> h[c] + anhgm3p[c]	ECOLC_RS17200	GlcNAc-anhMurNAc tripeptide transport in via proton symport (periplasm)	Murein Recycling	0	0	1000	0
AGM4PA	anhgm4p[c] + h2o[c] -> LalaDgluMdapDala[c] + anhgm[c]	ECOLC_RS19055	N-Acetyl-D-glucosamine(anhydrous)N-Acetylmuramyl-tetrapeptide amidase	Murein Recycling	0	0	1000	0
AGM4PApp	h2o[p] + anhgm4p[p] -> LalaDgluMdapDala[p] + anhgm[p]	ECOLC_RS06670 or ECOLC_RS04795 or ECOLC_RS20665	N-Acetyl-D-glucosamine(anhydrous)N-Acetylmuramyl-tetrapeptide amidase (periplasm)	Murein Recycling	0	0	1000	0
AGM4PCP	anhgm4p[c] + h2o[c] -> anhgm3p[c] + ala__D[c]	ECOLC_RS13050	N-Acetyl-D-glucosamine(anhydrous)N-Acetylmuramyl-tetrapeptide L,D-carboxypeptidase	Murein Recycling	0	0	1000	0
AGM4PCPpp	h2o[p] + anhgm4p[p] -> anhgm3p[p] + ala__D[p]	"	N-Acetyl-D-glucosamine(anhydrous)N-Acetylmuramyl-tetrapeptide L,D-carboxypeptidase (periplasmic)	Murein Recycling	0	0	1000	0
AGM4PH	anhgm4p[c] + h2o[c] -> acgam[c] + anhm4p[c]	ECOLC_RS13385	N-Acetyl-D-glucosamine(anhydrous)N-Acetylmuramyl-tetrapeptide beta -1,4-N-acetylglucosaminidase	Murein Recycling	0	0	1000	0
AGM4Pt2pp	h[p] + anhgm4p[p] -> h[c] + anhgm4p[c]	ECOLC_RS17200	GlcNAc-anhMurNAc tetrapeptide transport in via proton symport (periplasm)	Murein Recycling	0	0	1000	0
AGMH	h2o[c] + anhgm[c] -> acgam[c] + anhm[c]	ECOLC_RS13385	N-Acetyl-D-glucosamine(anhydrous)N-Acetylmuramyl beta -1,4-N-acetylglucosaminidase	Murein Recycling	0	0	1000	0
AGMHE	adphep_DD[c] -> adphep_LD[c]	ECOLC_RS00480	ADP-D-glycero-D-manno-heptose epimerase	Lipopolysaccharide Biosynthesis / Recycling	0	0	1000	0
AGMT	h2o[c] + agm[c] -> urea[c] + ptrc[c]	ECOLC_RS04130	Agmatinase	Arginine and Proline Metabolism	0	0	1000	0
AGMt2pp	h[p] + anhgm[p] -> h[c] + anhgm[c]	ECOLC_RS17200	GlcNAc-anhMurNAc transport in via proton symport (periplasm)	Murein Recycling	0	0	1000	0
AGMtex	agm[e] <=> agm[p]	ECOLC_RS17950 or ECOLC_RS14330 or ECOLC_RS12200 or ECOLC_RS07685	Agmatine transport via diffusion (extracellular to periplasm)	Transport Outer Membrane Porin	1	-1000	1000	0
AGPAT120	ddcaACP[c] + 1ddecg3p[c] -> pa120[c] + ACP[c]	ECOLC_RS03605	1-tetradecanoyl-sn-glycerol 3-phosphate O-acyltransferase (n-C12:0)	Glycerophospholipid Metabolism	0	0	1000	0
AGPAT140	1tdecg3p[c] + myrsACP[c] -> pa140[c] + ACP[c]	ECOLC_RS03605	1-tetradecanoyl-sn-glycerol 3-phosphate O-acyltransferase (n-C14:0)	Glycerophospholipid Metabolism	0	0	1000	0
AGPAT141	tdeACP[c] + 1tdec7eg3p[c] -> pa141[c] + ACP[c]	ECOLC_RS03605	1-tetradec-7-enoyl-sn-glycerol 3-phosphate O-acyltransferase (n-C14:1)	Glycerophospholipid Metabolism	0	0	1000	0
AGPAT160	1hdecg3p[c] + palmACP[c] -> pa160[c] + ACP[c]	ECOLC_RS03605	1-hexadecanoyl-sn-glycerol 3-phosphate O-acyltransferase (n-C16:0)	Glycerophospholipid Metabolism	0	0	1000	0
AGPAT161	hdeACP[c] + 1hdec9eg3p[c] -> pa161[c] + ACP[c]	ECOLC_RS03605	1-hexadec-7-enoyl-sn-glycerol 3-phosphate O-acyltransferase (n-C16:1)	Glycerophospholipid Metabolism	0	0	1000	0
AGPAT180	ocdcaACP[c] + 1odecg3p[c] -> pa180[c] + ACP[c]	ECOLC_RS03605	1-octadecanoyl-sn-glycerol 3-phosphate O-acyltransferase (n-C18:0)	Glycerophospholipid Metabolism	0	0	1000	0
AGPAT181	1odec11eg3p[c] + octeACP[c] -> pa181[c] + ACP[c]	ECOLC_RS03605	1-octadec-7-enoyl-sn-glycerol 3-phosphate O-acyltransferase (n-C18:1)	Glycerophospholipid Metabolism	0	0	1000	0
AGPR	acg5sa[c] + pi[c] + nadp[c] <=> h[c] + nadph[c] + acg5p[c]	ECOLC_RS21860	N-acetyl-g-glutamyl-phosphate reductase	Arginine and Proline Metabolism	1	-1000	1000	0
AGt3	h[e] + ag[c] -> h[c] + ag[e]	ECOLC_RS16540 and ECOLC_RS16535 and ECOLC_RS16530 and ECOLC_RS16525	Silver transport out via proton antiport	Inorganic Ion Transport and Metabolism	0	0	1000	0
AH6PI	ah6p__D[c] -> f6p[c]	"	Arabino-3-hexulose-6-P Isomerase	#N/A	0	0	1000	0
AHCYSNS	ahcys[c] + h2o[c] -> rhcys[c] + ade[c]	ECOLC_RS18805	S-adenosylhomocysteine nucleosidase	Methionine Metabolism	0	0	1000	0
AHGDx	nad[c] + S2hglut[c] <=> h[c] + akg[c] + nadh[c]	"	(S)-alpha-hydroxyglutarate dehydrogenase	Glycine and Serine Metabolism	1	-1000	1000	0
AI2abcpp	mththf[p] + atp[c] + h2o[c] -> h[c] + mththf[c] + adp[c] + pi[c]	"	Autoinducer-2 ABC transporter	Transport Inner Membrane	0	0	1000	0
AI2K	dhptd[c] + atp[c] -> h[c] + adp[c] + dhptdp[c]	"	Autoinducer-2 kinase	Methionine Metabolism	0	0	1000	0
AI2tex	mththf[e] <=> mththf[p]	"	Ai2 transport, outer membrane	Transport Outer Membrane	1	-1000	1000	0
AI2tpp	mththf[c] -> mththf[p]	"	Quorum signal AI-2 exporter	Transport Inner Membrane	0	0	1000	0
AICART	10fthf[c] + aicar[c] <=> thf[c] + fprica[c]	ECOLC_RS21620	Phosphoribosylaminoimidazolecarboxamide formyltransferase	Purine and Pyrimidine Biosynthesis	1	-1000	1000	0
AIRC2	air[c] + atp[c] + hco3[c] -> h[c] + adp[c] + pi[c] + 5caiz[c]	ECOLC_RS16680	Phosphoribosylaminoimidazole carboxylase	Purine and Pyrimidine Biosynthesis	0	0	1000	0
AIRC3	5aizc[c] <=> 5caiz[c]	ECOLC_RS16675	Phosphoribosylaminoimidazole carboxylase (mutase rxn)	Purine and Pyrimidine Biosynthesis	1	-1000	1000	0
AIRStex	airs[e] <=> airs[p]	"	Aminoimidazole riboside transport via diffusion extracellular to periplasm	Transport Outer Membrane Porin	1	-1000	1000	0
AIRStpp	airs[p] <=> airs[c]	"	Aminoimidazole riboside facilitated transport periplasm	Transport Inner Membrane	1	-1000	1000	0
AKGDH	akg[c] + nad[c] + coa[c] -> nadh[c] + co2[c] + succoa[c]	ECOLC_RS19025 and ECOLC_RS15740 and ECOLC_RS15735	2-Oxogluterate dehydrogenase	Citric Acid Cycle	0	0	1000	0
AKGt2rpp	h[p] + akg[p] <=> h[c] + akg[c]	ECOLC_RS05855	2-oxoglutarate reversible transport via symport (periplasm)	Transport Inner Membrane	1	-1000	1000	0
AKGtex	akg[e] <=> akg[p]	ECOLC_RS17950 or ECOLC_RS14330 or ECOLC_RS12200 or ECOLC_RS07685	Alpha-ketoglutarate transport via diffusion (extracellular to periplasm)	Transport Outer Membrane Porin	1	-1000	1000	0
ALAabcpp	atp[c] + h2o[c] + ala__L[p] -> h[c] + adp[c] + pi[c] + ala__L[c]	ECOLC_RS01395 and ECOLC_RS01390 and ECOLC_RS01380 and ECOLC_RS01360 and ECOLC_RS01385	L-alanine transport via ABC system (periplasm)	Transport Inner Membrane	0	0	1000	0
ALAALAabcpp	alaala[p] + atp[c] + h2o[c] -> h[c] + adp[c] + pi[c] + alaala[c]	(ECOLC_RS11625 and ECOLC_RS11630 and ECOLC_RS11635 and ECOLC_RS11640 and ECOLC_RS11645) or (ECOLC_RS00895 and ECOLC_RS00905 and ECOLC_RS00910 and ECOLC_RS00915 and ECOLC_RS00920)	D-alanyl-D-alanine (DalaDala) transport via ABC system (periplasm)	Transport Inner Membrane	0	0	1000	0
ALAALAD	h2o[c] + alaala[c] -> 2 ala__D[c]	ECOLC_RS11620	D-alanine-D-alanine dipeptidase	Murein Recycling	0	0	1000	0
ALAALAr	atp[c] + 2 ala__D[c] <=> h[c] + adp[c] + pi[c] + alaala[c]	ECOLC_RS17470 or ECOLC_RS19145	D-alanine-D-alanine ligase (reversible)	Cell Envelope Biosynthesis	1	-1000	1000	0
ALAALAtex	alaala[e] <=> alaala[p]	ECOLC_RS17950 or ECOLC_RS14330 or ECOLC_RS12200 or ECOLC_RS07685	D-alanyl-D-alanine (DalaDala) transport via diffusion (extracellular to periplasm)	Transport Outer Membrane Porin	1	-1000	1000	0
ALAGLUE	LalaDglu[c] <=> LalaLglu[c]	ECOLC_RS12325	L-alanyl-gamma-glutamate epimerase	Murein Recycling	1	-1000	1000	0
ALAR	ala__L[c] <=> ala__D[c]	ECOLC_RS13060 or ECOLC_RS21370	Alanine racemase	Alanine and Aspartate Metabolism	1	-1000	1000	0
ALAt2pp	h[p] + ala__L[p] -> h[c] + ala__L[c]	ECOLC_RS20425	L-alanine transport in via proton symport (periplasm)	Transport Inner Membrane	0	0	1000	0
ALAt4pp	na1[p] + ala__L[p] -> ala__L[c] + na1[c]	ECOLC_RS19585	L-alanine transport in via sodium symport (periplasm)	Transport Inner Membrane	0	0	1000	0
ALATA_D2	pydx5p[c] + ala__D[c] -> pyam5p[c] + pyr[c]	ECOLC_RS06065 or ECOLC_RS14645	D-alanine transaminase	Cofactor and Prosthetic Group Biosynthesis	0	0	1000	0
ALATA_L	akg[c] + ala__L[c] <=> glu__L[c] + pyr[c]	ECOLC_RS07315 or ECOLC_RS06940	L-alanine transaminase	Alanine and Aspartate Metabolism	1	-1000	1000	0
ALATA_L2	pydx5p[c] + ala__L[c] -> pyam5p[c] + pyr[c]	ECOLC_RS14645 or ECOLC_RS06065	Alanine transaminase	Cofactor and Prosthetic Group Biosynthesis	0	0	1000	0
ALAtex	ala__L[e] <=> ala__L[p]	ECOLC_RS17950 or ECOLC_RS14330 or ECOLC_RS12200 or ECOLC_RS07685	L-alanine transport via diffusion (extracellular to periplasm)	Transport Outer Membrane Porin	1	-1000	1000	0
ALAtpp	ala__L[c] -> ala__L[p]	"	L-alanine export via facilited diffusion	Transport Inner Membrane	0	0	1000	0
ALATRS	ala__L[c] + atp[c] + trnaala[c] -> ppi[c] + amp[c] + alatrna[c]	ECOLC_RS05410	Alanyl-tRNA synthetase	tRNA Charging	0	0	1000	0
ALCD19	h[c] + glyald[c] + nadh[c] <=> nad[c] + glyc[c]	ECOLC_RS17565	Alcohol dehydrogenase (glycerol)	Alternate Carbon Metabolism	1	-1000	1000	0
ALCD2x	nad[c] + etoh[c] <=> h[c] + acald[c] + nadh[c]	ECOLC_RS11670 or ECOLC_RS12785 or ECOLC_RS17565	Alcohol dehydrogenase (ethanol)	Pyruvate Metabolism	1	-1000	1000	0
ALDD19xr	nad[c] + pacald[c] + h2o[c] <=> 2 h[c] + pac[c] + nadh[c]	ECOLC_RS12155	Aldehyde dehydrogenase (phenylacetaldehyde, NAD)	Alternate Carbon Metabolism	1	-1000	1000	0
ALDD2x	h2o[c] + nad[c] + acald[c] -> nadh[c] + 2 h[c] + ac[c]	ECOLC_RS12450	Aldehyde dehydrogenase (acetaldehyde, NAD)	Alternate Carbon Metabolism	0	0	1000	0
ALDD2y	nadp[c] + h2o[c] + acald[c] -> 2 h[c] + ac[c] + nadph[c]	ECOLC_RS00650	Aldehyde dehydrogenase (acetaldehyde, NADP)	Alternate Carbon Metabolism	0	0	1000	0
ALDD3y	nadp[c] + h2o[c] + ppal[c] -> 2 h[c] + ppa[c] + nadph[c]	ECOLC_RS00650	Aldehyde dehydrogenase (propanal, NADP)	Alternate Carbon Metabolism	0	0	1000	0
ALDD4	btal[c] + nad[c] + h2o[c] -> 2 h[c] + but[c] + nadh[c]	"	Aldehyde dehydrogenase (butanal, NAD)	Alternate Carbon Metabolism	0	0	1000	0
ALKP	dhap[c] + h2o[c] -> pi[c] + dha[c]	"	Alkaline phosphatase	Alternate Carbon Metabolism	0	0	1000	0
ALLabcpp	all__D[p] + atp[c] + h2o[c] -> h[c] + all__D[c] + adp[c] + pi[c]	ECOLC_RS21185 and ECOLC_RS21180 and ECOLC_RS21190	D-allose transport via ABC system (periplasm)	Transport Inner Membrane	0	0	1000	0
ALLK	all__D[c] + atp[c] -> h[c] + adp[c] + all6p[c]	ECOLC_RS21200	Allose kinase	Alternate Carbon Metabolism	0	0	1000	0
ALLPI	all6p[c] <=> allul6p[c]	ECOLC_RS21170	Allose 6-phosphate isomerase	Alternate Carbon Metabolism	1	-1000	1000	0
ALLTAMH	2 h2o[c] + 2 h[c] + alltt[c] -> 2 nh4[c] + co2[c] + urdglyc[c]	"	Allantoate amidohydrolase	Alternate Carbon Metabolism	0	0	1000	0
ALLtex	all__D[e] <=> all__D[p]	ECOLC_RS17950 or ECOLC_RS14330 or ECOLC_RS12200 or ECOLC_RS07685	Allose transport via diffusion (extracellular to periplasm)	Transport Outer Membrane Porin	1	-1000	1000	0
ALLTN	h2o[c] + alltn[c] -> h[c] + alltt[c]	ECOLC_RS16740	Allantoinase	Nitrogen Metabolism	0	0	1000	0
ALLTNt2rpp	h[p] + alltn[p] <=> h[c] + alltn[c]	ECOLC_RS16745	Allantoin transport in via proton symport (periplasm)	Transport Inner Membrane	1	-1000	1000	0
ALLTNtex	alltn[e] <=> alltn[p]	ECOLC_RS17950 or ECOLC_RS14330 or ECOLC_RS12200 or ECOLC_RS07685	Allantoin transport via diffusion (extracellular to periplasm)	Transport Outer Membrane Porin	1	-1000	1000	0
ALLULPE	allul6p[c] <=> f6p[c]	ECOLC_RS21195	Allulose 6-phosphate epimerase	Alternate Carbon Metabolism	1	-1000	1000	0
ALPATE160pp	alpp[p] + pe160[p] -> lpp[p] + 2agpe160[p]	ECOLC_RS16095 and ECOLC_RS10500	Apolipoprotein N-acyltransferase (phosphatidylethanolamine, periplasm)	Unassigned	0	0	1000	0
ALPATG160pp	alpp[p] + pg160[p] -> lpp[p] + 2agpg160[p]	ECOLC_RS16095 and ECOLC_RS10500	Apolipoprotein N-acyltransferase (phosphatidylglycerol, periplasm)	Unassigned	0	0	1000	0
ALR2	h[c] + mthgxl[c] + nadph[c] -> nadp[c] + acetol[c]	ECOLC_RS03630 or ECOLC_RS18565 or ECOLC_RS09955 or ECOLC_RS03685	Aldose reductase (methylglyoxal)	Methylglyoxal Metabolism	0	0	1000	0
ALR4x	h[c] + acetol[c] + nadh[c] -> nad[c] + 12ppd__R[c]	ECOLC_RS21920	Aldose reductase (acetol)	Glycerophospholipid Metabolism	0	0	1000	0
ALTRH	altrn[c] -> 2ddglcn[c] + h2o[c]	ECOLC_RS03225	Altronate hydrolase	Alternate Carbon Metabolism	0	0	1000	0
AM3PA	anhm3p[c] + h2o[c] -> anhm[c] + LalaDgluMdap[c]	ECOLC_RS19055	Anhydrous-N-Acetylmuramyl-tripeptide amidase	Murein Recycling	0	0	1000	0
AM4PA	anhm4p[c] + h2o[c] -> LalaDgluMdapDala[c] + anhm[c]	ECOLC_RS19055	Anhydrous-N-Acetylmuramyl-tetrapeptide amidase	Murein Recycling	0	0	1000	0
AM4PCP	anhm4p[c] + h2o[c] -> anhm3p[c] + ala__D[c]	ECOLC_RS13050	Anhydrous-N-Acetylmuramyl-tetrapeptide L,D-carboxypeptidase	Murein Recycling	0	0	1000	0
AMALT1	malt[c] + malttr[c] -> glc__D[c] + maltttr[c]	ECOLC_RS01585	Amylomaltase (maltotriose)	Alternate Carbon Metabolism	0	0	1000	0
AMALT2	malt[c] + maltttr[c] -> glc__D[c] + maltpt[c]	ECOLC_RS01585	Amylomaltase (maltotetraose)	Alternate Carbon Metabolism	0	0	1000	0
AMALT3	malt[c] + maltpt[c] -> glc__D[c] + malthx[c]	ECOLC_RS01585	Amylomaltase (maltopentaose)	Alternate Carbon Metabolism	0	0	1000	0
AMALT4	malt[c] + malthx[c] -> glc__D[c] + malthp[c]	ECOLC_RS01585	Amylomaltase (maltohexaose)	Alternate Carbon Metabolism	0	0	1000	0
AMANAPEr	acmanap[c] <=> acgam6p[c]	ECOLC_RS02570	N-acetylmannosamine 6-phosphate epimerase	Alternate Carbon Metabolism	1	-1000	1000	0
AMANK	atp[c] + acmana[c] -> h[c] + adp[c] + acmanap[c]	ECOLC_RS02575	N-acetyl-D-mannosamine kinase	Alternate Carbon Metabolism	0	0	1000	0
AMAOTr	amet[c] + 8aonn[c] <=> dann[c] + amob[c]	ECOLC_RS15390	Adenosylmethionine-8-amino-7-oxononanoate transaminase	Cofactor and Prosthetic Group Biosynthesis	1	-1000	1000	0
AMMQLT8	amet[c] + 2dmmql8[c] -> h[c] + ahcys[c] + mql8[c]	ECOLC_RS22520	S-adenosylmethione:2-demthylmenaquinole methyltransferase (menaquinone 8)	Cofactor and Prosthetic Group Biosynthesis	0	0	1000	0
AMPMS2	nad[c] + air[c] + h2o[c] -> 3 h[c] + 4ampm[c] + nadh[c] + 2 for[c]	ECOLC_RS21680	4-amino-2-methyl-5-phosphomethylpyrimidine synthetase	Cofactor and Prosthetic Group Biosynthesis	0	0	1000	0
AMPN	h2o[c] + amp[c] -> r5p[c] + ade[c]	ECOLC_RS08890	AMP nucleosidase	Nucleotide Salvage Pathway	0	0	1000	0
AMPTASECG	cgly[c] + h2o[c] -> cys__L[c] + gly[c]	ECOLC_RS17970 or ECOLC_RS14315 or ECOLC_RS20185 or ECOLC_RS06205	Alanyl aminopeptidase (cys-gly)	Cysteine Metabolism	0	0	1000	0
AMPTASEPG	progly[c] + h2o[c] -> gly[c] + pro__L[c]	ECOLC_RS20185 or ECOLC_RS17970 or ECOLC_RS06205 or ECOLC_RS14315	Aminopeptidase (pro-gly)	Arginine and Proline Metabolism	0	0	1000	0
AMPtex	amp[e] <=> amp[p]	ECOLC_RS07685 or ECOLC_RS14330 or ECOLC_RS12200 or ECOLC_RS17950	AMP transport via diffusion (extracellular to periplasm)	Transport Outer Membrane Porin	1	-1000	1000	0
ANHGMtex	anhgm[e] <=> anhgm[p]	ECOLC_RS17950 or ECOLC_RS14330 or ECOLC_RS12200 or ECOLC_RS07685	GlcNAc-anhMurNAc transport via diffusion (extracellular to periplasm)	Transport Outer Membrane Porin	1	-1000	1000	0
ANHMK	atp[c] + h2o[c] + anhm[c] -> h[c] + acmum6p[c] + adp[c]	ECOLC_RS10690	1,6-anhydrous-N-Acetylmuramate kinase	Murein Recycling	0	0	1000	0
ANPRT	anth[c] + prpp[c] -> pran[c] + ppi[c]	ECOLC_RS12670	Anthranilate phosphoribosyltransferase	Tyrosine Tryptophan and Phenylalanine Metabolism	0	0	1000	0
ANS	chor[c] + gln__L[c] -> h[c] + glu__L[c] + anth[c] + pyr[c]	ECOLC_RS12670 and ECOLC_RS12665	Anthranilate synthase	Tyrosine Tryptophan and Phenylalanine Metabolism	0	0	1000	0
AOBUTDs	h[c] + 2aobut[c] -> aact[c] + co2[c]	s0001	L-2-amino-3-oxobutanoate decarboxylation (spontaneous)	Threonine and Lysine Metabolism	0	0	1000	0
AOXSr2	pimACP[c] + ala__L[c] -> 8aonn[c] + co2[c] + ACP[c]	ECOLC_RS15380	8-amino-7-oxononanoate synthase	Cofactor and Prosthetic Group Biosynthesis	0	0	1000	0
AP4AH	h2o[c] + ap4a[c] -> 2 h[c] + 2 adp[c]	ECOLC_RS19355	Ap4A hydrolase	Nucleotide Salvage Pathway	0	0	1000	0
AP4AS	h[c] + 2 atp[c] -> ppi[c] + ap4a[c]	ECOLC_RS20960	Ap4A synthetase	Nucleotide Salvage Pathway	0	0	1000	0
AP5AH	h2o[c] + ap5a[c] -> 2 h[c] + adp[c] + atp[c]	ECOLC_RS19355	Ap5A hydrolase	Nucleotide Salvage Pathway	0	0	1000	0
APCS	15dap[c] + ametam[c] -> h[c] + 5mta[c] + na15dap[c]	ECOLC_RS19000	Aminopropylcadaverine synthase	Arginine and Proline Metabolism	0	0	1000	0
APG3PAT120	glyc3p[c] + ddcap[c] -> h[c] + pi[c] + 1ddecg3p[c]	ECOLC_RS03390	Acyl-phosphate:glycerol-3-phosphate acyltransferase (C12:0)	Glycerophospholipid Metabolism	0	0	1000	0
APG3PAT140	glyc3p[c] + ttdcap[c] -> h[c] + pi[c] + 1tdecg3p[c]	ECOLC_RS03390	Acyl-phosphate:glycerol-3-phosphate acyltransferase (C14:0)	Glycerophospholipid Metabolism	0	0	1000	0
APG3PAT141	glyc3p[c] + ttdceap[c] -> h[c] + pi[c] + 1tdec7eg3p[c]	ECOLC_RS03390	Acyl-phosphate:glycerol-3-phosphate acyltransferase (C14:1)	Glycerophospholipid Metabolism	0	0	1000	0
APG3PAT160	glyc3p[c] + hdcap[c] -> h[c] + 1hdecg3p[c] + pi[c]	ECOLC_RS03390	Acyl-phosphate:glycerol-3-phosphate acyltransferase (C16:0)	Glycerophospholipid Metabolism	0	0	1000	0
APG3PAT161	glyc3p[c] + hdceap[c] -> h[c] + pi[c] + 1hdec9eg3p[c]	ECOLC_RS03390	Acyl-phosphate:glycerol-3-phosphate acyltransferase (C16:1)	Glycerophospholipid Metabolism	0	0	1000	0
APG3PAT180	glyc3p[c] + ocdcap[c] -> h[c] + pi[c] + 1odecg3p[c]	ECOLC_RS03390	Acyl-phosphate:glycerol-3-phosphate acyltransferase (C18:0)	Glycerophospholipid Metabolism	0	0	1000	0
APG3PAT181	glyc3p[c] + ocdceap[c] -> h[c] + 1odec11eg3p[c] + pi[c]	ECOLC_RS03390	Acyl-phosphate:glycerol-3-phosphate acyltransferase (C18:1)	Glycerophospholipid Metabolism	0	0	1000	0
APH120	ddcap[c] + h2o[c] -> 2 h[c] + pi[c] + ddca[c]	ECOLC_RS14125	Acylphosphatase (C12:0)	Glycerophospholipid Metabolism	0	0	1000	0
APH140	ttdcap[c] + h2o[c] -> 2 h[c] + pi[c] + ttdca[c]	ECOLC_RS14125	Acylphosphatase (C14:0)	Glycerophospholipid Metabolism	0	0	1000	0
APH141	ttdceap[c] + h2o[c] -> 2 h[c] + pi[c] + ttdcea[c]	ECOLC_RS14125	Acylphosphatase (C14:1)	Glycerophospholipid Metabolism	0	0	1000	0
APH160	hdcap[c] + h2o[c] -> 2 h[c] + pi[c] + hdca[c]	ECOLC_RS14125	Acylphosphatase (C16:0)	Glycerophospholipid Metabolism	0	0	1000	0
APH161	hdceap[c] + h2o[c] -> 2 h[c] + hdcea[c] + pi[c]	ECOLC_RS14125	Acylphosphatase (C16:1)	Glycerophospholipid Metabolism	0	0	1000	0
APH180	h2o[c] + ocdcap[c] -> 2 h[c] + ocdca[c] + pi[c]	ECOLC_RS14125	Acylphosphatase (C18:0)	Glycerophospholipid Metabolism	0	0	1000	0
APH181	h2o[c] + ocdceap[c] -> 2 h[c] + ocdcea[c] + pi[c]	ECOLC_RS14125	Acylphosphatase (C18:1)	Glycerophospholipid Metabolism	0	0	1000	0
APPLDHr	h[c] + aact[c] + nadh[c] <=> nad[c] + appl[c]	ECOLC_RS21920	Aminopropanol dehydrogenase reversible	Threonine and Lysine Metabolism	1	-1000	1000	0
APRAUR	h[c] + 5apru[c] + nadph[c] -> nadp[c] + 5aprbu[c]	ECOLC_RS17295	5-amino-6-(5-phosphoribosylamino)uracil reductase	Cofactor and Prosthetic Group Biosynthesis	0	0	1000	0
ARABDI	arab__D[c] <=> rbl__D[c]	ECOLC_RS04870	L-fucose isomerase	Alternate Carbon Metabolism	1	-1000	1000	0
ARAI	arab__L[c] <=> rbl__L[c]	ECOLC_RS19300	L-arabinose isomerase	Alternate Carbon Metabolism	1	-1000	1000	0
ARBabcpp	atp[c] + h2o[c] + arab__L[p] -> h[c] + adp[c] + pi[c] + arab__L[c]	ECOLC_RS09320 and ECOLC_RS09325 and ECOLC_RS09330	L-arabinose transport via ABC system (periplasm)	Transport Inner Membrane	0	0	1000	0
ARBt2rpp	h[p] + arab__L[p] <=> h[c] + arab__L[c]	ECOLC_RS04665	L-arabinose transport via proton symport (periplasm)	Transport Inner Membrane	1	-1000	1000	0
ARBt3ipp	h[p] + arab__L[c] -> h[c] + arab__L[p]	ECOLC_RS11420	L-arabinose transport via proton antiport (periplasm)	Transport Inner Membrane	0	0	1000	0
ARBtex	arab__L[e] <=> arab__L[p]	ECOLC_RS17950 or ECOLC_RS14330 or ECOLC_RS12200 or ECOLC_RS07685	L-arabinose transport via diffusion (extracellular to periplasm)	Transport Outer Membrane Porin	1	-1000	1000	0
ARBTNabcpp	atp[c] + arbtn_fe3[p] + h2o[c] -> h[c] + adp[c] + pi[c] + arbtn_fe3[c]	ECOLC_RS18835 and ECOLC_RS18845 and ECOLC_RS18840	Aerobactin transport via ABC system (periplasm)	Transport Inner Membrane	0	0	1000	0
ARBTNexs	arbtn[e] + fe3[e] -> arbtn_fe3[e]	s0001	Aerobactin Fe-loading reaction (spontaneous)	Inorganic Ion Transport and Metabolism	0	0	1000	0
ARBTNR1	fadh2[c] + 2 arbtn_fe3[c] -> 2 h[c] + 2 fe2[c] + fad[c] + 2 arbtn[c]	"	Aerobactin reductase	Inorganic Ion Transport and Metabolism	0	0	1000	0
ARBTNR2	fmnh2[c] + 2 arbtn_fe3[c] -> 2 h[c] + 2 fe2[c] + fmn[c] + 2 arbtn[c]	"	Aerobactin reductase	Inorganic Ion Transport and Metabolism	0	0	1000	0
ARBTNR3	rbflvrd[c] + 2 arbtn_fe3[c] -> 2 h[c] + 2 fe2[c] + ribflv[c] + 2 arbtn[c]	"	Aerobactin reductase	Inorganic Ion Transport and Metabolism	0	0	1000	0
ARBTNtex	arbtn[p] + h[p] -> arbtn[e] + h[c]	"	Aerobactin secretion (to extracellular)	Transport Outer Membrane	0	0	1000	0
ARBTNtonex	h[p] + arbtn_fe3[e] -> h[c] + arbtn_fe3[p]	"	Aerobactin transport via ton system (extracellular)	Transport Outer Membrane	0	0	1000	0
ARBTNtpp	h[p] + arbtn[c] -> h[c] + arbtn[p]	"	Aerobactin secretion (to periplasm)	Inorganic Ion Transport and Metabolism	0	0	1000	0
ARBTptspp	pep[c] + arbt[p] -> arbt6p[c] + pyr[c]	(ECOLC_RS23070 and ECOLC_RS06770 and ECOLC_RS06765) or (ECOLC_RS05315 and ECOLC_RS06770 and ECOLC_RS06765)	Arbutin transport via PEP:Pyr PTS (periplasm)	Transport Inner Membrane	0	0	1000	0
ARBTtex	arbt[e] -> arbt[p]	ECOLC_RS07685 or ECOLC_RS12200 or ECOLC_RS17950 or ECOLC_RS14330	Arbutin transport via diffusion (extracellular to periplasm)	Transport Outer Membrane Porin	0	0	1000	0
ARGabcpp	atp[c] + h2o[c] + arg__L[p] -> h[c] + arg__L[c] + adp[c] + pi[c]	(ECOLC_RS07210 and ECOLC_RS07225 and ECOLC_RS07230 and ECOLC_RS07220) or (ECOLC_RS14680 and ECOLC_RS14695 and ECOLC_RS14690 and ECOLC_RS14675 and ECOLC_RS14685)	L-arginine transport via ABC system (periplasm)	Transport Inner Membrane	0	0	1000	0
ARGAGMt7pp	agm[c] + arg__L[p] <=> arg__L[c] + agm[p]	ECOLC_RS21045	Arginine/agmatine antiport (periplasm)	Transport Inner Membrane	1	-1000	1000	0
ARGDC	h[c] + arg__L[c] -> agm[c] + co2[c]	ECOLC_RS21035	Arginine decarboxylase	Arginine and Proline Metabolism	0	0	1000	0
ARGDCpp	h[p] + arg__L[p] -> agm[p] + co2[p]	ECOLC_RS04125	Arginine decarboxylase	Arginine and Proline Metabolism	0	0	1000	0
ARGORNt7pp	orn[c] + arg__L[p] <=> arg__L[c] + orn[p]	ECOLC_RS10875	Arginine/ornithine antiporter (periplasm)	Transport Inner Membrane	1	-1000	1000	0
ARGSL	argsuc[c] <=> arg__L[c] + fum[c]	ECOLC_RS21850	Argininosuccinate lyase	Arginine and Proline Metabolism	1	-1000	1000	0
ARGSS	citr__L[c] + asp__L[c] + atp[c] -> h[c] + argsuc[c] + ppi[c] + amp[c]	ECOLC_RS02800	Argininosuccinate synthase	Arginine and Proline Metabolism	0	0	1000	0
ARGt3pp	arg__L[c] + h[p] -> h[c] + arg__L[p]	ECOLC_RS04195	L-arginine transport out via proton antiport (cytoplasm to periplasm)	Transport Inner Membrane	0	0	1000	0
ARGtex	arg__L[e] <=> arg__L[p]	ECOLC_RS17950 or ECOLC_RS14330 or ECOLC_RS12200 or ECOLC_RS07685	L-arginine transport via diffusion (extracellular to periplasm)	Transport Outer Membrane Porin	1	-1000	1000	0
ARGTRS	arg__L[c] + atp[c] + trnaarg[c] -> ppi[c] + amp[c] + argtrna[c]	ECOLC_RS09430	Arginyl-tRNA synthetase	tRNA Charging	0	0	1000	0
ARHGDx	nad[c] + r2hglut[c] <=> h[c] + akg[c] + nadh[c]	"	(R)-alpha-hydroxyglutarate dehydrogenase	Glycine and Serine Metabolism	1	-1000	1000	0
ARMEPNS	mepn[c] + atp[c] -> rpntp[c] + ade[c]	"	?-D-ribose 1-methylphosphonate 5-triphosphate synthase	Alternate Carbon Metabolism	0	0	1000	0
ASAD	aspsa[c] + pi[c] + nadp[c] <=> h[c] + nadph[c] + 4pasp[c]	ECOLC_RS01495	Aspartate-semialdehyde dehydrogenase	Threonine and Lysine Metabolism	1	-1000	1000	0
ASCBPL	ascb6p[c] + h2o[c] -> h[c] + 3dhgulnp[c]	ECOLC_RS20550	L-ascorbate 6-phosphate lactonase	Alternate Carbon Metabolism	0	0	1000	0
ASCBptspp	pep[c] + ascb__L[p] -> ascb6p[c] + pyr[c]	ECOLC_RS06770 and ECOLC_RS06765 and ECOLC_RS20535 and ECOLC_RS20540 and ECOLC_RS20545	L-ascorbate transport via PEP:Pyr PTS (periplasm)	Transport Inner Membrane	0	0	1000	0
ASCBtex	ascb__L[e] <=> ascb__L[p]	ECOLC_RS17950 or ECOLC_RS14330 or ECOLC_RS12200 or ECOLC_RS07685	L-ascorbate transport via diffusion (extracellular to periplasm)	Transport Outer Membrane Porin	1	-1000	1000	0
ASNabcpp	h2o[c] + atp[c] + asn__L[p] -> pi[c] + asn__L[c] + adp[c] + h[c]	"	L-asparagine transport via ABC system (periplasm)	Transport Inner Membrane	0	0	1000	0
ASNN	h2o[c] + asn__L[c] -> asp__L[c] + nh4[c]	ECOLC_RS10025 or ECOLC_RS15105	L-asparaginase	Alanine and Aspartate Metabolism	0	0	1000	0
ASNNpp	h2o[p] + asn__L[p] -> nh4[p] + asp__L[p]	ECOLC_RS04030	L-asparaginase	Alanine and Aspartate Metabolism	0	0	1000	0
ASNS1	asp__L[c] + atp[c] + gln__L[c] + h2o[c] -> h[c] + ppi[c] + glu__L[c] + asn__L[c] + amp[c]	ECOLC_RS16030	Asparagine synthase (glutamine-hydrolysing)	Alanine and Aspartate Metabolism	0	0	1000	0
ASNS2	asp__L[c] + nh4[c] + atp[c] -> h[c] + ppi[c] + asn__L[c] + amp[c]	ECOLC_RS22960	Asparagine synthetase	Alanine and Aspartate Metabolism	0	0	1000	0
ASNt2rpp	h[p] + asn__L[p] <=> h[c] + asn__L[c]	ECOLC_RS11815	L-asparagine reversible transport via proton symport (periplasm)	Transport Inner Membrane	1	-1000	1000	0
ASNtex	asn__L[e] <=> asn__L[p]	ECOLC_RS17950 or ECOLC_RS14330 or ECOLC_RS12200 or ECOLC_RS07685	L-asparagine transport via diffusion (extracellular to periplasm)	Transport Outer Membrane Porin	1	-1000	1000	0
ASNTRS	asn__L[c] + atp[c] + trnaasn[c] -> ppi[c] + amp[c] + asntrna[c]	ECOLC_RS14325	Asparaginyl-tRNA synthetase	tRNA Charging	0	0	1000	0
ASO3t8pp	aso3[c] + atp[c] + h2o[c] -> h[c] + adp[c] + pi[c] + aso3[p]	ECOLC_RS01125	Arsenite efflux via ATP hydrolysis (periplasm)	Transport Inner Membrane	0	0	1000	0
ASO3tex	aso3[e] <=> aso3[p]	ECOLC_RS17950 or ECOLC_RS14330 or ECOLC_RS12200 or ECOLC_RS07685	Arsenite transport via diffusion (extracellular to periplasm)	Transport Outer Membrane Porin	1	-1000	1000	0
ASP1DC	h[c] + asp__L[c] -> ala_B[c] + co2[c]	ECOLC_RS18950	Aspartate 1-decarboxylase	Cofactor and Prosthetic Group Biosynthesis	0	0	1000	0
ASPabcpp	atp[c] + asp__L[p] + h2o[c] -> h[c] + adp[c] + asp__L[c] + pi[c]	ECOLC_RS16105 and ECOLC_RS16110 and ECOLC_RS16115 and ECOLC_RS16120	L-aspartate transport via ABC system (periplasm)	Transport Inner Membrane	0	0	1000	0
ASPCT	asp__L[c] + cbp[c] -> h[c] + pi[c] + cbasp[c]	(ECOLC_RS20265 and ECOLC_RS20260) or ECOLC_RS20260	Aspartate carbamoyltransferase	Purine and Pyrimidine Biosynthesis	0	0	1000	0
ASPK	asp__L[c] + atp[c] <=> adp[c] + 4pasp[c]	ECOLC_RS19615 or ECOLC_RS21955 or ECOLC_RS21535	Aspartate kinase	Threonine and Lysine Metabolism	1	-1000	1000	0
ASPO3	asp__L[c] + q8[c] -> h[c] + q8h2[c] + iasp[c]	ECOLC_RS05930	L-aspartate oxidase	Cofactor and Prosthetic Group Biosynthesis	0	0	1000	0
ASPO4	asp__L[c] + mqn8[c] -> h[c] + iasp[c] + mql8[c]	ECOLC_RS05930	L-aspartate oxidase	Cofactor and Prosthetic Group Biosynthesis	0	0	1000	0
ASPO5	asp__L[c] + fum[c] -> h[c] + iasp[c] + succ[c]	ECOLC_RS05930	L-aspartate oxidase	Cofactor and Prosthetic Group Biosynthesis	0	0	1000	0
ASPO6	asp__L[c] + o2[c] -> h[c] + h2o2[c] + iasp[c]	ECOLC_RS05930	L-aspartate oxidase	Cofactor and Prosthetic Group Biosynthesis	0	0	1000	0
ASPT	asp__L[c] -> nh4[c] + fum[c]	ECOLC_RS20825	L-aspartase	Alanine and Aspartate Metabolism	0	0	1000	0
ASPt2pp	h[p] + asp__L[p] -> h[c] + asp__L[c]	ECOLC_RS21245	L-aspartate transport in via proton symport (periplasm)	Transport Inner Membrane	0	0	1000	0
ASPTA	akg[c] + asp__L[c] <=> glu__L[c] + oaa[c]	ECOLC_RS14340	Aspartate transaminase	Alanine and Aspartate Metabolism	1	-1000	1000	0
ASPtex	asp__L[e] <=> asp__L[p]	ECOLC_RS17950 or ECOLC_RS14330 or ECOLC_RS12200 or ECOLC_RS07685	L-aspartate transport via diffusion (extracellular to periplasm)	Transport Outer Membrane Porin	1	-1000	1000	0
ASPTRS	atp[c] + asp__L[c] + trnaasp[c] -> ppi[c] + amp[c] + asptrna[c]	ECOLC_RS09480	Aspartyl-tRNA synthetase	tRNA Charging	0	0	1000	0
ASR	2 gthrd[c] + aso4[c] -> aso3[c] + h2o[c] + gthox[c]	ECOLC_RS01120 and ECOLC_RS13600	Arsenate reductase	Inorganic Ion Transport and Metabolism	0	0	1000	0
AST	arg__L[c] + succoa[c] -> h[c] + sucarg[c] + coa[c]	ECOLC_RS10135	Arginine succinyltransferase	Arginine and Proline Metabolism	0	0	1000	0
ATHRDHr	nadp[c] + athr__L[c] <=> h[c] + 2aobut[c] + nadph[c]	ECOLC_RS11360	L-allo-threonine dehydrogenase	Threonine and Lysine Metabolism	1	-1000	1000	0
ATPHs	h[c] + atp[c] + h2o[c] -> nh4[c] + itp[c]	s0001	ATP amine hydrolysis (spontaneous)	Nucleotide Salvage Pathway	0	0	1000	0
ATPM	atp[c] + h2o[c] -> h[c] + adp[c] + pi[c]	"	ATP maintenance requirement	Unassigned	0	6.86	1000	0
ATPPRT	atp[c] + prpp[c] -> prbatp[c] + ppi[c]	ECOLC_RS08675	ATP phosphoribosyltransferase	Histidine Metabolism	0	0	1000	0
ATPS4rpp	4 h[p] + adp[c] + pi[c] <=> 3 h[c] + atp[c] + h2o[c]	((ECOLC_RS23000 and ECOLC_RS22995 and ECOLC_RS22990) and (ECOLC_RS23025 and ECOLC_RS23020 and ECOLC_RS23015 and ECOLC_RS23010 and ECOLC_RS23005) and ECOLC_RS22985) or ((ECOLC_RS23000 and ECOLC_RS22995 and ECOLC_RS22990) and (ECOLC_RS23025 and ECOLC_RS23020 and ECOLC_RS23015 and ECOLC_RS23010 and ECOLC_RS23005))	ATP synthase (four protons for one ATP) (periplasm)	Oxidative Phosphorylation	1	-1000	1000	0
BALAt2pp	h[p] + ala_B[p] -> h[c] + ala_B[c]	ECOLC_RS20425	Beta-alanine transport in via proton symport (periplasm)	Transport Inner Membrane	0	0	1000	0
BALAtex	ala_B[e] <=> ala_B[p]	ECOLC_RS17950 or ECOLC_RS14330 or ECOLC_RS12200 or ECOLC_RS07685	Beta-alanine transport via diffusion (extracellular to periplasm)	Transport Outer Membrane Porin	1	-1000	1000	0
BETALDHx	nad[c] + h2o[c] + betald[c] -> 2 h[c] + glyb[c] + nadh[c]	ECOLC_RS17785	Betaine-aldehyde dehydrogenase	Unassigned	0	0	1000	0
BETALDHy	nadp[c] + h2o[c] + betald[c] -> 2 h[c] + glyb[c] + nadph[c]	ECOLC_RS17785	Betaine-aldehyde dehydrogenase	Unassigned	0	0	1000	0
BGLA1	6pgg[c] + h2o[c] -> glc__D[c] + g6p[c]	"	6-phospho-beta-glucosidase	Alternate Carbon Metabolism	0	0	1000	0
BIOMASS_Ec_iML1515_core_75p37M	0.000691 mn2[c] + 0.000223 10fthf[c] + 0.000223 pydx5p[c] + 0.25369 thr__L[c] + 0.000223 thmpp[c] + 0.000323 ni2[c] + 0.21579 ser__L[c] + 0.000223 sheme[c] + 0.13351 ctp[c] + 0.29579 arg__L[c] + 0.001831 nad[c] + 0.008675 mg2[c] + 0.24105 asp__L[c] + 0.15369 met__L[c] + 0.000223 amet[c] + 0.013013 nh4[c] + 0.000341 zn2[c] + 0.1379 tyr__L[c] + 0.09158 cys__L[c] + 75.5522 atp[c] + 0.000223 thf[c] +…	"	E. coli biomass objective function (iML1515) - core - with 75.37 GAM estimate	#N/A	0	0	1000	0
BIOMASS_Ec_iML1515_WT_75p37M	0.000223 adocbl[c] + 0.000223 gthrd[c] + 0.000658 mn2[c] + 7e-06 mocogdp[c] + 0.000223 10fthf[c] + 0.000223 pydx5p[c] + 0.000605 murein3px4p[p] + 0.24651 thr__L[c] + 0.00229 clpn161[p] + 0.000223 thmpp[c] + 0.000307 ni2[c] + 0.20968 ser__L[c] + 0.000223 sheme[c] + 0.1298 ctp[c] + 0.000279 accoa[c] + 0.28742 arg__L[c] + 0.001787 nad[c] + 0.008253 mg2[c] + 0.23423 asp__L[c] + 0.14934 met__L[c] + 0.…	"	E. coli biomass objective function (iML1515) - WT - with 75.37 GAM estimate	#N/A	0	0	1000	1
BMOCOS	mptamp[c] + moco[c] -> bmoco[c] + cu2[c] + amp[c]	ECOLC_RS15110	Bis-molybdenum cofactor synthase	Cofactor and Prosthetic Group Biosynthesis	0	0	1000	0
BMOGDS1	h[c] + bmoco[c] + gtp[c] -> bmoco1gdp[c] + ppi[c]	ECOLC_RS22410 or (ECOLC_RS22410 and ECOLC_RS22415)	Bis-molybdopterin guanine dinucleotide synthase (single GDP)	Cofactor and Prosthetic Group Biosynthesis	0	0	1000	0
BMOGDS2	h[c] + bmoco1gdp[c] + gtp[c] -> bmocogdp[c] + ppi[c]	ECOLC_RS22410 or (ECOLC_RS22410 and ECOLC_RS22415)	Bis-molybdopterin guanine dinucleotide synthase	Cofactor and Prosthetic Group Biosynthesis	0	0	1000	0
BPNT	pap[c] + h2o[c] -> pi[c] + amp[c]	ECOLC_RS20395	3,5-bisphosphate nucleotidase	Cysteine Metabolism	0	0	1000	0
BSORx	h[c] + nadh[c] + btnso[c] -> nad[c] + h2o[c] + btn[c]	ECOLC_RS00855	Biotin sulfoxide reductase	Cofactor and Prosthetic Group Biosynthesis	0	0	1000	0
BSORy	h[c] + nadph[c] + btnso[c] -> nadp[c] + h2o[c] + btn[c]	ECOLC_RS00855	Biotin sulfoxide reductase	Cofactor and Prosthetic Group Biosynthesis	0	0	1000	0
BTNt2ipp	h[p] + btn[p] -> h[c] + btn[c]	"	Biotin transport via proton symport (periplasm)	Transport Inner Membrane	0	0	1000	0
BTNtex	btn[e] <=> btn[p]	ECOLC_RS07685 or ECOLC_RS12200 or ECOLC_RS17950 or ECOLC_RS14330	Biotin transport via diffusion (extracellular to periplasm)	Transport Outer Membrane Porin	1	-1000	1000	0
BTS5	amet[c] + 2fe2s[c] + dtbt[c] -> h[c] + met__L[c] + dad_5[c] + 2fe1s[c] + btn[c]	ECOLC_RS15385	Biotin synthase	Cofactor and Prosthetic Group Biosynthesis	0	0	1000	0
BUTCT	accoa[c] + but[c] -> ac[c] + btcoa[c]	ECOLC_RS07650 and ECOLC_RS07645	Acetyl-CoA:butyrate-CoA transferase	Alternate Carbon Metabolism	0	0	1000	0
BUTSO3abcpp	atp[c] + butso3[p] + h2o[c] -> h[c] + adp[c] + pi[c] + butso3[c]	(ECOLC_RS14295 and ECOLC_RS14310 and ECOLC_RS14305) or (ECOLC_RS17535 and ECOLC_RS17530 and ECOLC_RS17525)	Butanesulfonate transport via ABC system (periplasm)	Transport Inner Membrane	0	0	1000	0
BUTSO3tex	butso3[e] <=> butso3[p]	ECOLC_RS17950 or ECOLC_RS14330 or ECOLC_RS12200 or ECOLC_RS07685	Butanesulfonate transport via diffusion (extracellular to periplasm)	Transport Outer Membrane Porin	1	-1000	1000	0
BUTt2rpp	h[p] + but[p] <=> h[c] + but[c]	ECOLC_RS07640	Butyrate transport via proton symport, reversible (periplasm)	Transport Inner Membrane	1	-1000	1000	0
BUTtex	but[e] <=> but[p]	ECOLC_RS17950 or ECOLC_RS14330 or ECOLC_RS12200 or ECOLC_RS07685	Butyrate transport via diffusion (extracellular to periplasm)	Transport Outer Membrane Porin	1	-1000	1000	0
BWCOGDS1	h[c] + bwco[c] + gtp[c] -> ppi[c] + bwco1gdp[c]	ECOLC_RS22410 or (ECOLC_RS22410 and ECOLC_RS22415)	Tungsten bispterin guanine dinucleotide synthase (single GDP)	Cofactor and Prosthetic Group Biosynthesis	0	0	1000	0
BWCOGDS2	h[c] + bwco1gdp[c] + gtp[c] -> bwcogdp[c] + ppi[c]	ECOLC_RS22410 or (ECOLC_RS22410 and ECOLC_RS22415)	Tungsten bispterin guanine dinucleotide synthase	Cofactor and Prosthetic Group Biosynthesis	0	0	1000	0
BWCOS	wco[c] + mptamp[c] -> bwco[c] + cu2[c] + amp[c]	ECOLC_RS15110	Tungsten bispterin cofactor synthase	Cofactor and Prosthetic Group Biosynthesis	0	0	1000	0
CA2tex	ca2[e] <=> ca2[p]	ECOLC_RS17950 or ECOLC_RS14330 or ECOLC_RS12200 or ECOLC_RS07685	Calcium (Ca+2) transport via diffusion (extracellular to periplasm)	Transport Outer Membrane Porin	1	-1000	1000	0
CADVtpp	h[p] + 15dap[c] + lys__L[p] -> h[c] + 15dap[p] + lys__L[c]	ECOLC_RS20945	Lysine/Cadaverine antiporter (periplasm)	Transport Inner Membrane	0	0	1000	0
CAT	2 h2o2[c] -> o2[c] + 2 h2o[c]	ECOLC_RS10215 or ECOLC_RS21940	Catalase	Unassigned	0	0	1000	0
CAt6pp	na1[p] + ca2[c] <=> ca2[p] + na1[c]	ECOLC_RS02680	Calcium / sodium antiporter (1:1)	Inorganic Ion Transport and Metabolism	1	-1000	1000	0
CBIAT	h[c] + atp[c] + cbi[c] <=> pppi[c] + adocbi[c]	ECOLC_RS12640	Cobinamide adenyltransferase	Cofactor and Prosthetic Group Biosynthesis	1	-1000	1000	0
CBItonex	h[p] + cbi[e] -> h[c] + cbi[p]	ECOLC_RS21820 and (ECOLC_RS12725 and ECOLC_RS03670 and ECOLC_RS03665)	Cobinamide transport via ton system (extermal)	Transport Outer Membrane	0	0	1000	0
CBIuabcpp	cbi[p] + atp[c] + h2o[c] -> h[c] + adp[c] + pi[c] + cbi[c]	ECOLC_RS10320 and ECOLC_RS10330 and ECOLC_RS18810	Cobinamide transport via ABC system (uptake, periplasm)	Transport Inner Membrane	0	0	1000	0
CBL1abcpp	atp[c] + h2o[c] + cbl1[p] -> h[c] + cbl1[c] + adp[c] + pi[c]	ECOLC_RS10320 and ECOLC_RS10330 and ECOLC_RS18810	Cob(1)alamin transport via ABC system (periplasm)	Transport Inner Membrane	0	0	1000	0
CBL1tonex	h[p] + cbl1[e] -> h[c] + cbl1[p]	ECOLC_RS21820 and (ECOLC_RS12725 and ECOLC_RS03670 and ECOLC_RS03665)	Cob(1)alamin transport via ton system (extermal)	Transport Outer Membrane	0	0	1000	0
CBLAT	h[c] + cbl1[c] + atp[c] <=> adocbl[c] + pppi[c]	ECOLC_RS12640	Cob(I)alamin adenosyltransferase	Cofactor and Prosthetic Group Biosynthesis	1	-1000	1000	0
CBMD	2 h[c] + cbm[c] -> nh4[c] + co2[c]	s0001	Carbamate deaminase	Nucleotide Salvage Pathway	0	0	1000	0
CBMKr	nh4[c] + atp[c] + co2[c] <=> 2 h[c] + adp[c] + cbp[c]	ECOLC_RS16685 or ECOLC_RS17725 or ECOLC_RS04440	Carbamate kinase	Unassigned	1	-1000	1000	0
CBPS	2 atp[c] + gln__L[c] + hco3[c] + h2o[c] -> 2 h[c] + 2 adp[c] + pi[c] + cbp[c] + glu__L[c]	ECOLC_RS19445 and ECOLC_RS19440	Carbamoyl-phosphate synthase (glutamine-hydrolysing)	Arginine and Proline Metabolism	0	0	1000	0
CCGS	nh4[c] + atp[c] + cdg[c] -> h[c] + preq0[c] + adp[c] + pi[c] + h2o[c]	ECOLC_RS17140	7-cyano-7-carbaguanine synthase	Cofactor and Prosthetic Group Biosynthesis	0	0	1000	0
CD2abcpp	cd2[c] + atp[c] + h2o[c] -> h[c] + adp[c] + cd2[p] + pi[c]	ECOLC_RS01315	Cadmium (Cd+2) ABC transporter (periplasm)	Inorganic Ion Transport and Metabolism	0	0	1000	0
CD2t3pp	cd2[c] + h[p] -> h[c] + cd2[p]	ECOLC_RS22105 or ECOLC_RS15600	Cadmium (Cd+2) transport out via proton antiport (periplasm)	Inorganic Ion Transport and Metabolism	0	0	1000	0
CD2tex	cd2[e] <=> cd2[p]	ECOLC_RS17950 or ECOLC_RS14330 or ECOLC_RS12200 or ECOLC_RS07685	Cadmium (Cd+2) transport via diffusion (extracellular to periplasm)	Transport Outer Membrane Porin	1	-1000	1000	0
CD2tpp	cd2[p] -> cd2[c]	ECOLC_RS03495	Cadmium (+2) transport in via permease (no H+)	Inorganic Ion Transport and Metabolism	0	0	1000	0
CDAPPA120	cdpdddecg[c] + h2o[c] -> 2 h[c] + pa120[c] + cmp[c]	ECOLC_RS22090	CDP-Diacylglycerol pyrophostatase (n-C12:0)	Glycerophospholipid Metabolism	0	0	1000	0
CDAPPA140	cdpdtdecg[c] + h2o[c] -> 2 h[c] + pa140[c] + cmp[c]	ECOLC_RS22090	CDP-Diacylglycerol pyrophostatase (n-C14:0)	Glycerophospholipid Metabolism	0	0	1000	0
CDAPPA141	cdpdtdec7eg[c] + h2o[c] -> 2 h[c] + pa141[c] + cmp[c]	ECOLC_RS22090	CDP-Diacylglycerol pyrophostatase (n-C14:1)	Glycerophospholipid Metabolism	0	0	1000	0
CDAPPA160	h2o[c] + cdpdhdecg[c] -> 2 h[c] + pa160[c] + cmp[c]	ECOLC_RS22090	CDP-Diacylglycerol pyrophostatase (n-C16:0)	Glycerophospholipid Metabolism	0	0	1000	0
CDAPPA161	cdpdhdec9eg[c] + h2o[c] -> 2 h[c] + pa161[c] + cmp[c]	ECOLC_RS22090	CDP-Diacylglycerol pyrophostatase (n-C16:1)	Glycerophospholipid Metabolism	0	0	1000	0
CDAPPA180	cdpdodecg[c] + h2o[c] -> 2 h[c] + pa180[c] + cmp[c]	ECOLC_RS22090	CDP-Diacylglycerol pyrophostatase (n-C18:0)	Glycerophospholipid Metabolism	0	0	1000	0
CDAPPA181	h2o[c] + cdpdodec11eg[c] -> 2 h[c] + pa181[c] + cmp[c]	ECOLC_RS22090	CDP-Diacylglycerol pyrophostatase (n-C18:1)	Glycerophospholipid Metabolism	0	0	1000	0
CDGR	3 h[c] + preq0[c] + 2 nadph[c] -> preq1[c] + 2 nadp[c]	ECOLC_RS04910	7-cyano-7-deazaguanine reductase	Cofactor and Prosthetic Group Biosynthesis	0	0	1000	0
CDGS	h[c] + cph4[c] -> nh4[c] + cdg[c]	"	7-deaza-7-carboxyguanine synthase	Cofactor and Prosthetic Group Biosynthesis	0	0	1000	0
CDGUNPD	cdigmp[c] + h2o[c] -> h[c] + 5pg35pg[c]	"	3,5-cyclic-nucleotide phosphodiesterase	Alternate Carbon Metabolism	0	0	1000	0
CDPMEK	4c2me[c] + atp[c] -> h[c] + 2p4c2me[c] + adp[c]	ECOLC_RS12965	4-(cytidine 5-diphospho)-2-C-methyl-D-erythritol kinase	Cofactor and Prosthetic Group Biosynthesis	0	0	1000	0
CDPPH	h2o[c] + cdp[c] -> h[c] + pi[c] + cmp[c]	"	CDP phosphohydrolase	#N/A	0	0	1000	0
CELBpts	pep[c] + cellb[e] -> 6pgg[c] + pyr[c]	"	Cellobiose transport via PEPPyr PTS	Transport Inner Membrane	0	0	1000	0
CFAS160E	2 amet[c] + pe161[c] -> 2 h[c] + cpe160[c] + 2 ahcys[c]	ECOLC_RS10580	Cyclopropane fatty acid synthase (Phosphatidylethanolamine, n-C16:0)	Glycerophospholipid Metabolism	0	0	1000	0
CFAS160G	2 amet[c] + pg161[c] -> 2 h[c] + 2 ahcys[c] + cpg160[c]	ECOLC_RS10580	Cyclopropane fatty acid synthase (Phosphatidylglycerol, n-C16:0)	Glycerophospholipid Metabolism	0	0	1000	0
CFAS180E	2 amet[c] + pe181[c] -> 2 h[c] + 2 ahcys[c] + cpe180[c]	ECOLC_RS10580	Cyclopropane fatty acid synthase (Phosphatidylethanolamine, n-C18:0)	Glycerophospholipid Metabolism	0	0	1000	0
CFAS180G	2 amet[c] + pg181[c] -> 2 h[c] + 2 ahcys[c] + cpg180[c]	ECOLC_RS10580	Cyclopropane fatty acid synthase (Phosphatidylglycerol, n-C18:0)	Glycerophospholipid Metabolism	0	0	1000	0
CGLYabcpp	atp[c] + cgly[p] + h2o[c] -> h[c] + cgly[c] + adp[c] + pi[c]	ECOLC_RS00895 and ECOLC_RS00905 and ECOLC_RS00910 and ECOLC_RS00915 and ECOLC_RS00920	L-Cysteinylglycine (Cys-Gly) transport via ABC system (periplasm)	Transport Inner Membrane	0	0	1000	0
CGLYtex	cgly[e] <=> cgly[p]	ECOLC_RS17950 or ECOLC_RS14330 or ECOLC_RS12200 or ECOLC_RS07685	L-Cysteinylglycine transport via diffusion (extracellular to periplasm)	Transport Outer Membrane Porin	1	-1000	1000	0
CH4t2pp	ch4[c] -> ch4[p]	"	Methane Transport(periplasm)	#N/A	0	0	1000	0
CH4tex	ch4[e] <=> ch4[p]	"	Methane Transport(extracellular via diffusion)	#N/A	1	-1000	1000	0
CHITOBpts	pep[c] + chitob[p] -> pyr[c] + chit6p[c]	"	Chitobiose transport via PTS	Transport	0	0	1000	0
CHITPH	h2o[c] + chit6p[c] -> acgam[c] + acgam6p[c]	"	Chitobiose-6-phosphate hydrolase	Alternate Carbon Metabolism	0	0	1000	0
CHLabcpp	atp[c] + chol[p] + h2o[c] -> h[c] + chol[c] + adp[c] + pi[c]	ECOLC_RS08135 and ECOLC_RS08130 and ECOLC_RS08125 and ECOLC_RS08120	Choline transport via ABC system (periplasm)	Transport Inner Membrane	0	0	1000	0
CHLt2pp	h[p] + chol[p] -> h[c] + chol[c]	ECOLC_RS17775 or ECOLC_RS09850	Choline transport via proton symport (periplasm)	Transport Inner Membrane	0	0	1000	0
CHLtex	chol[e] <=> chol[p]	ECOLC_RS17950 or ECOLC_RS14330 or ECOLC_RS12200 or ECOLC_RS07685	Choline transport via diffusion (extracellular to periplasm)	Transport Outer Membrane Porin	1	-1000	1000	0
CHOLATEtpp	h[p] + cholate[c] -> h[c] + cholate[p]	"	Cholate transport via proton antiport	Transport Inner Membrane	0	0	1000	0
CHOLD	nad[c] + chol[c] -> h[c] + betald[c] + nadh[c]	ECOLC_RS17790	Choline dehydrogenase	Unassigned	0	0	1000	0
CHOLID	nad[c] + cholate[c] -> h[c] + dhcholn[c] + nadh[c]	"	7-?-hydroxysteroid dehydrogenase	Alternate Carbon Metabolism	0	0	1000	0
CHORM	chor[c] -> pphn[c]	ECOLC_RS05795 or ECOLC_RS05790	Chorismate mutase	Tyrosine Tryptophan and Phenylalanine Metabolism	0	0	1000	0
CHORS	3psme[c] -> pi[c] + chor[c]	ECOLC_RS07115	Chorismate synthase	Tyrosine Tryptophan and Phenylalanine Metabolism	0	0	1000	0
CHRPL	chor[c] -> 4hbz[c] + pyr[c]	ECOLC_RS21440	Chorismate pyruvate lyase	Cofactor and Prosthetic Group Biosynthesis	0	0	1000	0
CHTBSptspp	chtbs[p] + pep[c] -> chtbs6p[c] + pyr[c]	ECOLC_RS06765	Chitobiose transport via PEP:Pyr PTS (periplasm)	Transport Inner Membrane	0	0	1000	0
CHTBStex	chtbs[e] <=> chtbs[p]	ECOLC_RS07685 or ECOLC_RS14330 or ECOLC_RS12200 or ECOLC_RS17950	Chitobiose transport via diffusion (extracellular to periplasm)	Transport Outer Membrane Porin	1	-1000	1000	0
CINNDO	h[c] + o2[c] + cinnm[c] + nadh[c] -> nad[c] + cenchddd[c]	ECOLC_RS06130 and ECOLC_RS06125 and ECOLC_RS06120 and ECOLC_RS06110	Cinnamate dioxygenase	Alternate Carbon Metabolism	0	0	1000	0
CITL	cit[c] -> ac[c] + oaa[c]	(ECOLC_RS16305 and ECOLC_RS16300 and ECOLC_RS16295) and ECOLC_RS16310	Citrate lyase	Citric Acid Cycle	0	0	1000	0
CITt3pp	h[p] + cit[c] -> h[c] + cit[p]	"	Citrate transport out via proton antiport (periplasm)	Transport Inner Membrane	0	0	1000	0
CITt7pp	cit[p] + succ[c] -> succ[p] + cit[c]	ECOLC_RS16320	Citrate transport via succinate antiport (periplasm)	Transport Inner Membrane	0	0	1000	0
CITtex	cit[e] <=> cit[p]	ECOLC_RS17950 or ECOLC_RS14330 or ECOLC_RS12200 or ECOLC_RS07685	Citrate transport via diffusion (extracellular to periplasm)	Transport Outer Membrane Porin	1	-1000	1000	0
CLBtex	cellb[e] <=> cellb[p]	ECOLC_RS17950 or ECOLC_RS14330 or ECOLC_RS12200 or ECOLC_RS07685	Cellobiose transport transport via diffusion extracellular to periplasm	S_Transport_Outer_Membrane_Porin	1	-1000	1000	0
CLIPAabctex	lipa_cold[p] + atp[c] + h2o[c] -> h[c] + adp[c] + pi[c] + lipa_cold[e]	ECOLC_RS02660 and ECOLC_RS02655 and ECOLC_RS02665 and ECOLC_RS20180 and ECOLC_RS20175	Cold lipid A transport via ABC system (periplasm to extracellular)	Lipopolysaccharide Biosynthesis / Recycling	0	0	1000	0
CLPNH120pp	clpn120[p] + h2o[p] -> h[p] + pa120[p] + pg120[p]	"	Cardiolipin hydrolase (periplasm, n-C12:0)	Glycerophospholipid Metabolism	0	0	1000	0
CLPNH140pp	h2o[p] + clpn140[p] -> h[p] + pg140[p] + pa140[p]	"	Cardiolipin hydrolase (periplasm, n-C14:0)	Glycerophospholipid Metabolism	0	0	1000	0
CLPNH141pp	h2o[p] + clpn141[p] -> h[p] + pg141[p] + pa141[p]	"	Cardiolipin hydrolase (periplasm, n-C14:1)	Glycerophospholipid Metabolism	0	0	1000	0
CLPNH160pp	h2o[p] + clpn160[p] -> h[p] + pg160[p] + pa160[p]	"	Cardiolipin hydrolase (periplasm, n-C16:0)	Glycerophospholipid Metabolism	0	0	1000	0
CLPNH161pp	clpn161[p] + h2o[p] -> h[p] + pa161[p] + pg161[p]	"	Cardiolipin hydrolase (periplasm, n-C16:1)	Glycerophospholipid Metabolism	0	0	1000	0
CLPNH180pp	h2o[p] + clpn180[p] -> h[p] + pg180[p] + pa180[p]	"	Cardiolipin hydrolase (periplasm, n-C18:0)	Glycerophospholipid Metabolism	0	0	1000	0
CLPNH181pp	h2o[p] + clpn181[p] -> h[p] + pg181[p] + pa181[p]	"	Cardiolipin hydrolase (periplasm, n-C18:1)	Glycerophospholipid Metabolism	0	0	1000	0
CLPNS120pp	2 pg120[p] <=> clpn120[p] + glyc[p]	ECOLC_RS15310 or ECOLC_RS12745	Cardiolipin synthase (periplasmic, n-C12:0)	Glycerophospholipid Metabolism	1	-1000	1000	0
CLPNS140pp	2 pg140[p] <=> clpn140[p] + glyc[p]	ECOLC_RS12745 or ECOLC_RS15310	Cardiolipin synthase (periplasmic, n-C14:0)	Glycerophospholipid Metabolism	1	-1000	1000	0
CLPNS141pp	2 pg141[p] <=> clpn141[p] + glyc[p]	ECOLC_RS15310 or ECOLC_RS12745	Cardiolipin synthase (periplasmic, n-C14:1)	Glycerophospholipid Metabolism	1	-1000	1000	0
CLPNS160pp	2 pg160[p] <=> glyc[p] + clpn160[p]	ECOLC_RS15310 or ECOLC_RS12745	Cardiolipin synthase (periplasmic, n-C16:0)	Glycerophospholipid Metabolism	1	-1000	1000	0
CLPNS161pp	2 pg161[p] <=> clpn161[p] + glyc[p]	ECOLC_RS12745 or ECOLC_RS15310	Cardiolipin synthase (periplasmic, n-C16:1)	Glycerophospholipid Metabolism	1	-1000	1000	0
CLPNS180pp	2 pg180[p] <=> glyc[p] + clpn180[p]	ECOLC_RS15310 or ECOLC_RS12745	Cardiolipin synthase (periplasmic, n-C18:0)	Glycerophospholipid Metabolism	1	-1000	1000	0
CLPNS181pp	2 pg181[p] <=> glyc[p] + clpn181[p]	ECOLC_RS15310 or ECOLC_RS12745	Cardiolipin synthase (periplasmic, n-C18:1)	Glycerophospholipid Metabolism	1	-1000	1000	0
CLt3_2pp	h[c] + 2 cl[p] -> h[p] + 2 cl[c]	ECOLC_RS18825 or ECOLC_RS10945	Chloride transport out via proton antiport (2:1) (periplasm)	Inorganic Ion Transport and Metabolism	0	0	1000	0
CLtex	cl[e] <=> cl[p]	ECOLC_RS17950 or ECOLC_RS14330 or ECOLC_RS12200 or ECOLC_RS07685	Chloride (Cl-1) transport via diffusion (extracellular to periplasm)	Transport Outer Membrane Porin	1	-1000	1000	0
CLtipp	cl[p] -> cl[c]	"	Chloride ion transport in via diffusion (periplasm)	Inorganic Ion Transport and Metabolism	0	0	1000	0
CMCMSAD	h2o[c] + nad[c] + 5cmhmsa[c] -> nadh[c] + 2 h[c] + 5cmhm[c]	"	4 carboxy 2 hydroxymuconate 6 semialdehyde dehydrogenase	4 hydroxyphenylacetate catabolism	0	0	1000	0
CMHMI	5cmhm[c] -> 5cohe[c]	"	5 carboxymethyl 2 hydroxymuconate delta isomerase	4 hydroxyphenylacetate catabolism	0	0	1000	0
CMPN	h2o[c] + cmp[c] -> r5p[c] + csn[c]	"	CMP nucleosidase	Nucleotide Salvage Pathway	0	0	1000	0
CMPtex	cmp[e] <=> cmp[p]	ECOLC_RS17950 or ECOLC_RS14330 or ECOLC_RS12200 or ECOLC_RS07685	CMP transport via diffusion (extracellular to periplasm)	Transport Outer Membrane Porin	1	-1000	1000	0
CMtex	cm[e] <=> cm[p]	ECOLC_RS12200 or ECOLC_RS07685 or ECOLC_RS14330 or ECOLC_RS17950	Chloramphenicol transport via diffusion (extracellular to periplasm)	Transport Outer Membrane Porin	1	-1000	1000	0
CMtpp	h[p] + cm[p] -> h[c] + cm[e]	(ECOLC_RS16955 and ECOLC_RS16960 and ECOLC_RS03520) or (ECOLC_RS16955 and ECOLC_RS06490 and ECOLC_RS03520)	Chloramphenicol transport via TolC system	Transport Outer Membrane	0	0	1000	0
CO2tex	co2[e] <=> co2[p]	ECOLC_RS17950 or ECOLC_RS14330 or ECOLC_RS12200 or ECOLC_RS07685	CO2 transport via diffusion (extracellular to periplasm)	Transport Outer Membrane Porin	1	-1000	1000	0
CO2tpp	co2[p] <=> co2[c]	s0001	CO2 transporter via diffusion (periplasm)	Transport Inner Membrane	1	-1000	1000	0
COBALT2abcpp	atp[c] + cobalt2[c] + h2o[c] -> h[c] + adp[c] + pi[c] + cobalt2[p]	ECOLC_RS01315	Cobalt (Co+2) ABC transporter (periplasm)	Inorganic Ion Transport and Metabolism	0	0	1000	0
COBALT2t3pp	h[p] + cobalt2[c] -> h[c] + cobalt2[p]	ECOLC_RS15600 or ECOLC_RS22105	Cobalt (Co+2) transport out via proton antiport (periplasm)	Inorganic Ion Transport and Metabolism	0	0	1000	0
COBALT2tex	cobalt2[e] <=> cobalt2[p]	ECOLC_RS17950 or ECOLC_RS14330 or ECOLC_RS12200 or ECOLC_RS07685	Cobalt (Co+2) transport via diffusion (extracellular to periplasm)	Transport Outer Membrane Porin	1	-1000	1000	0
COBALT2tpp	cobalt2[p] -> cobalt2[c]	ECOLC_RS03495 or ECOLC_RS22605	Cobalt transport in via permease (no H+)	Inorganic Ion Transport and Metabolism	0	0	1000	0
COLIPAabcpp	atp[c] + h2o[c] + colipa[c] -> h[c] + adp[c] + pi[c] + colipa[p]	ECOLC_RS14410	Core oligosaccharide lipid A transport via ABC system (periplasm)	Lipopolysaccharide Biosynthesis / Recycling	0	0	1000	0
COLIPAabctex	atp[c] + colipa[p] + h2o[c] -> h[c] + adp[c] + pi[c] + colipa[e]	ECOLC_RS02660 and ECOLC_RS02655 and ECOLC_RS02665 and ECOLC_RS20180 and ECOLC_RS20175	Core oligosaccharide lipid A transport via ABC system (periplasm to extracellular)	Lipopolysaccharide Biosynthesis / Recycling	0	0	1000	0
COLIPAKpp	udcpdp[p] + colipa[p] -> colipap[p] + udcpp[p]	ECOLC_RS07890	Lipid A core kinase (periplasm)	Lipopolysaccharide Biosynthesis / Recycling	0	0	1000	0
COLIPAPabctex	colipap[p] + atp[c] + h2o[c] -> h[c] + adp[c] + pi[c] + colipap[e]	ECOLC_RS02660 and ECOLC_RS02655 and ECOLC_RS02665 and ECOLC_RS20180 and ECOLC_RS20175	Core oligosaccharide lipid A diphosphate transport via ABC system (periplasm to extracellular)	Lipopolysaccharide Biosynthesis / Recycling	0	0	1000	0
CPGNabcpp	atp[c] + h2o[c] + cpgn[p] -> h[c] + adp[c] + pi[c] + cpgn[c]	ECOLC_RS18835 and ECOLC_RS18845 and ECOLC_RS18840	Coprogen transport via ABC system (periplasm)	Transport Inner Membrane	0	0	1000	0
CPGNexs	cpgn_un[e] + fe3[e] -> cpgn[e]	s0001	Coprogen Fe-loading reaction (spontaneaous)	Inorganic Ion Transport and Metabolism	0	0	1000	0
CPGNR1	fadh2[c] + 2 cpgn[c] -> 2 h[c] + 2 fe2[c] + 2 cpgn_un[c] + fad[c]	"	Coprogen(Fe(III)) reductase	Inorganic Ion Transport and Metabolism	0	0	1000	0
CPGNR2	2 cpgn[c] + fmnh2[c] -> 2 h[c] + 2 fe2[c] + 2 cpgn_un[c] + fmn[c]	"	Coprogen(Fe(III)) reductase	Inorganic Ion Transport and Metabolism	0	0	1000	0
CPGNR3	2 cpgn[c] + rbflvrd[c] -> 2 h[c] + 2 fe2[c] + 2 cpgn_un[c] + ribflv[c]	"	Coprogen(Fe(III)) reductase	Inorganic Ion Transport and Metabolism	0	0	1000	0
CPGNtonex	h[p] + cpgn[e] -> h[c] + cpgn[p]	ECOLC_RS13410 and (ECOLC_RS12725 and ECOLC_RS03670 and ECOLC_RS03665)	Coprogen transport via ton system (extracellular)	Transport Outer Membrane	0	0	1000	0
CPGNUtex	h[p] + cpgn_un[p] -> cpgn_un[e] + h[c]	"	Coprogen unloaded secretion (extracellular)	Inorganic Ion Transport and Metabolism	0	0	1000	0
CPGNUtpp	h[p] + cpgn_un[c] -> h[c] + cpgn_un[p]	"	Coprogen unloaded secretion	Inorganic Ion Transport and Metabolism	0	0	1000	0
CPH4S	h2o[c] + ahdt[c] -> h[c] + pppi[c] + cph4[c] + acald[c]	ECOLC_RS05060	6-carboxy-5,6,7,8-tetrahydropterin synthase	Cofactor and Prosthetic Group Biosynthesis	0	0	1000	0
CPL	prpmn[c] -> prcp[c] + ch4[c]	"	Carbon-phosphorous lyase	Alternate Carbon Metabolism	0	0	1000	0
CPMPS	h2o[c] + gtp[c] -> cpmp[c] + ppi[c]	ECOLC_RS15350 and ECOLC_RS15340	Cyclic pyranopterin monophosphate synthase	Cofactor and Prosthetic Group Biosynthesis	0	0	1000	0
CPPPGO	2 h[c] + o2[c] + cpppg3[c] -> 2 h2o[c] + pppg9[c] + 2 co2[c]	ECOLC_RS06665	Coproporphyrinogen oxidase (O2 required)	Cofactor and Prosthetic Group Biosynthesis	0	0	1000	0
CPPPGO2	2 amet[c] + cpppg3[c] -> 2 met__L[c] + 2 dad_5[c] + pppg9[c] + 2 co2[c]	ECOLC_RS22360	Oxygen Independent coproporphyrinogen-III oxidase	Cofactor and Prosthetic Group Biosynthesis	0	0	1000	0
CRNabcpp	atp[c] + crn[p] + h2o[c] -> h[c] + adp[c] + pi[c] + crn[c]	ECOLC_RS05505 and ECOLC_RS05500 and ECOLC_RS05495	L-carnitine transport via ABC system (periplasm)	Transport Inner Membrane	0	0	1000	0
CRNBTCT	bbtcoa[c] + crn[c] <=> gbbtn[c] + crncoa[c]	ECOLC_RS19410	Gamma-butyrobetainyl-CoA: carnitine CoA transferase	Oxidative Phosphorylation	1	-1000	1000	0
CRNCAL2	atp[c] + crn[c] + coa[c] -> adp[c] + pi[c] + crncoa[c]	ECOLC_RS19415	Carnitine-CoA Ligase	Oxidative Phosphorylation	0	0	1000	0
CRNCAR	crncoa[c] <=> crnDcoa[c]	ECOLC_RS19420	Carnitine-CoA racemase	Oxidative Phosphorylation	1	-1000	1000	0
CRNCBCT	crn[c] + ctbtcoa[c] <=> ctbt[c] + crncoa[c]	ECOLC_RS19410	Crotonobetainyl-CoA: carnitine CoA transferase	Oxidative Phosphorylation	1	-1000	1000	0
CRNCDH	crncoa[c] <=> h2o[c] + ctbtcoa[c]	ECOLC_RS19420	Carnityl-CoA dehydratse	Oxidative Phosphorylation	1	-1000	1000	0
CRNDabcpp	crn__D[p] + atp[c] + h2o[c] -> h[c] + adp[c] + pi[c] + crn__D[c]	ECOLC_RS05505 and ECOLC_RS05500 and ECOLC_RS05495	D-carnitine transport via ABC system (periplasm)	Transport Inner Membrane	0	0	1000	0
CRNDCAL2	atp[c] + crn__D[c] + coa[c] -> adp[c] + pi[c] + crnDcoa[c]	ECOLC_RS19415	D-Carnitine-CoA Ligase	Oxidative Phosphorylation	0	0	1000	0
CRNDt2rpp	h[p] + crn__D[p] <=> h[c] + crn__D[c]	ECOLC_RS21070	D-carnitine outward transport (H+ antiport)	Transport Inner Membrane	1	-1000	1000	0
CRNDtex	crn__D[e] <=> crn__D[p]	ECOLC_RS12200 or ECOLC_RS07685 or ECOLC_RS14330 or ECOLC_RS17950	D-carnitine transport via diffusion (extracellular to periplasm)	Transport Outer Membrane Porin	1	-1000	1000	0
CRNt2rpp	h[p] + crn[p] <=> h[c] + crn[c]	ECOLC_RS21070	L-carnitine outward transport (H+ antiport)	Transport Inner Membrane	1	-1000	1000	0
CRNt7pp	gbbtn[c] + crn[p] -> gbbtn[p] + crn[c]	ECOLC_RS19400	Carnitine/butyrobetaine antiporter (periplasm)	Transport Inner Membrane	0	0	1000	0
CRNt8pp	crn[p] + crn__D[c] -> crn__D[p] + crn[c]	ECOLC_RS19400	L-carnitine/D-carnitine antiporter (periplasm)	Transport Inner Membrane	0	0	1000	0
CRNtex	crn[e] <=> crn[p]	ECOLC_RS17950 or ECOLC_RS14330 or ECOLC_RS12200 or ECOLC_RS07685	L-carnitine transport via diffusion (extracellular to periplasm)	Transport Outer Membrane Porin	1	-1000	1000	0
CS	accoa[c] + h2o[c] + oaa[c] -> h[c] + cit[c] + coa[c]	ECOLC_RS15775	Citrate synthase	Citric Acid Cycle	0	0	1000	0
CS1tex	cs1[e] <=> cs1[p]	"	Cesium transport via diffusion	Transport Outer Membrane	1	-1000	1000	0
CSND	h[c] + h2o[c] + csn[c] -> nh4[c] + ura[c]	ECOLC_RS17660	Cytosine deaminase	Nucleotide Salvage Pathway	0	0	1000	0
CSNt2pp	h[p] + csn[p] -> h[c] + csn[c]	ECOLC_RS17665	Cytosine transport in via proton symport (periplasm)	Transport Inner Membrane	0	0	1000	0
CSNtex	csn[e] <=> csn[p]	ECOLC_RS17950 or ECOLC_RS14330 or ECOLC_RS12200 or ECOLC_RS07685	Cytosine transport via diffusion (extracellular to periplasm)	Transport Outer Membrane Porin	1	-1000	1000	0
CTBTabcpp	ctbt[p] + atp[c] + h2o[c] -> h[c] + adp[c] + ctbt[c] + pi[c]	ECOLC_RS05505 and ECOLC_RS05500 and ECOLC_RS05495	Crotonobetaine transport via ABC system (periplasm)	Transport Inner Membrane	0	0	1000	0
CTBTCAL2	ctbt[c] + atp[c] + coa[c] -> adp[c] + pi[c] + ctbtcoa[c]	ECOLC_RS19415	Crotonobetaine-CoA Ligase	Oxidative Phosphorylation	0	0	1000	0
CTBTt2rpp	ctbt[p] + h[p] <=> h[c] + ctbt[c]	ECOLC_RS21070	Cronobetaine outward transport (H+ antiport)	Transport Inner Membrane	1	-1000	1000	0
CTECOAI6	tdecoa[c] <=> td2coa[c]	ECOLC_RS22465	3-cis-2-trans-enoyl-CoA isomerase	Membrane Lipid Metabolism	1	-1000	1000	0
CTECOAI7	hdcoa[c] <=> hdd2coa[c]	ECOLC_RS22465	3-cis-2-trans-enoyl-CoA isomerase	Membrane Lipid Metabolism	1	-1000	1000	0
CTECOAI8	odecoa[c] <=> od2coa[c]	ECOLC_RS22465	3-cis-2-trans-enoyl-CoA isomerase	Membrane Lipid Metabolism	1	-1000	1000	0
CTPS2	atp[c] + utp[c] + gln__L[c] + h2o[c] -> 2 h[c] + ctp[c] + adp[c] + pi[c] + glu__L[c]	ECOLC_RS04985	CTP synthase (glutamine)	Purine and Pyrimidine Biosynthesis	0	0	1000	0
CU1abcpp	atp[c] + h2o[c] + cu[c] -> h[c] + adp[c] + pi[c] + cu[p]	ECOLC_RS16845	Copper (Cu +1) ABC transporter (periplasm)	Inorganic Ion Transport and Metabolism	0	0	1000	0
CU1Opp	4 h[p] + o2[p] + 4 cu[p] -> 4 cu2[p] + 2 h2o[p]	ECOLC_RS18990	Cuprous Oxidase (Cu+1)	Inorganic Ion Transport and Metabolism	0	0	1000	0
CU2abcpp	atp[c] + h2o[c] + cu2[c] -> h[c] + cu2[p] + adp[c] + pi[c]	ECOLC_RS01315	Copper (Cu+2) ABC transporter (periplasm)	Inorganic Ion Transport and Metabolism	0	0	1000	0
CU2tex	cu2[e] <=> cu2[p]	ECOLC_RS07685 or ECOLC_RS17950 or ECOLC_RS14330 or ECOLC_RS12200	Copper (Cu+2) transport via diffusion (extracellular to periplasm)	Transport Outer Membrane Porin	1	-1000	1000	0
CU2tpp	cu2[p] -> cu2[c]	ECOLC_RS03495	Copper transport in via permease (no H+)	Inorganic Ion Transport and Metabolism	0	0	1000	0
CURR	h[c] + cur[c] + nadph[c] -> nadp[c] + dhcur[c]	"	NADPH-dependent curcumin reductase	Alternate Carbon Metabolism	0	0	1000	0
CUt3	h[e] + cu[c] -> h[c] + cu[e]	ECOLC_RS16540 and ECOLC_RS16535 and ECOLC_RS16530 and ECOLC_RS16525	Copper transport out via proton antiport	Transport Outer Membrane	0	0	1000	0
CUtex	cu[e] <=> cu[p]	ECOLC_RS17950 or ECOLC_RS14330 or ECOLC_RS12200 or ECOLC_RS07685	Copper (Cu+1) transport via diffusion (extracellular to periplasm)	Transport Outer Membrane Porin	1	-1000	1000	0
CXSAMS	amet[c] + pphn[c] -> phpyr[c] + h2o[c] + cxsam[c]	"	Carboxy-S-adenosyl-L-methionine synthase	Cofactor and Prosthetic Group Biosynthesis	0	0	1000	0
CYANST	cyan[c] + tsul[c] -> h[c] + tcynt[c] + so3[c]	ECOLC_RS01545	Cyanide sulfurtransferase	Unassigned	0	0	1000	0
CYANSTpp	cyan[p] + tsul[p] -> tcynt[p] + h[p] + so3[p]	ECOLC_RS12410	Cyanide sulfurtransferase (periplasmic)	Inorganic Ion Transport and Metabolism	0	0	1000	0
CYANtex	cyan[e] <=> cyan[p]	ECOLC_RS17950 or ECOLC_RS14330 or ECOLC_RS12200 or ECOLC_RS07685	Cyanide transport via diffusion (extracellular to periplasm)	Transport Outer Membrane Porin	1	-1000	1000	0
CYNTAH	3 h[c] + cynt[c] + hco3[c] -> nh4[c] + 2 co2[c]	ECOLC_RS17645	Cyanate aminohydrolase	Nitrogen Metabolism	0	0	1000	0
CYNTt2pp	h[p] + cynt[p] -> h[c] + cynt[c]	ECOLC_RS17640	Cyanate transport via proton symport (periplasm)	Transport Inner Membrane	0	0	1000	0
CYNTtex	cynt[e] <=> cynt[p]	ECOLC_RS17950 or ECOLC_RS14330 or ECOLC_RS12200 or ECOLC_RS07685	Cyanate transport via diffusion (extracellular to periplasm)	Transport Outer Membrane Porin	1	-1000	1000	0
CYSabc2pp	cys__L[c] + atp[c] + h2o[c] -> h[c] + adp[c] + pi[c] + cys__L[p]	ECOLC_RS14550 and ECOLC_RS14545	L-cysteine export via ABC system (cytoplasm to periplasm)	Transport Inner Membrane	0	0	1000	0
CYSabcpp	atp[c] + cys__L[p] + h2o[c] -> h[c] + adp[c] + pi[c] + cys__L[c]	"	L-cysteine uptake via ABC system (periplasm)	Transport Inner Membrane	0	0	1000	0
CYSDabcpp	atp[c] + h2o[c] + cys__D[p] -> h[c] + adp[c] + pi[c] + cys__D[c]	"	D-cysteine uptake via ABC system (periplasm)	Transport Inner Membrane	0	0	1000	0
CYSDDS	cys__D[c] + h2o[c] -> h2s[c] + nh4[c] + pyr[c]	ECOLC_RS09220	D-cysteine desulfhydrase	Cysteine Metabolism	0	0	1000	0
CYSDS	cys__L[c] + h2o[c] -> h2s[c] + nh4[c] + pyr[c]	ECOLC_RS23140 or ECOLC_RS03655	Cysteine Desulfhydrase	Cysteine Metabolism	0	0	1000	0
CYSDtex	cys__D[e] <=> cys__D[p]	ECOLC_RS17950 or ECOLC_RS14330 or ECOLC_RS12200 or ECOLC_RS07685	D-cysteine transport via diffusion (extracellular to periplasm)	Transport Outer Membrane Porin	1	-1000	1000	0
CYSIabcpp	h2o[c] + atp[c] + cysi__L[p] -> pi[c] + adp[c] + h[c] + cysi__L[c]	"	L cystine uptake via ABC system periplasm	Transport Inner Membrane	0	0	1000	0
CYSItex	cysi__L[e] <=> cysi__L[p]	"	L cystine transport via diffusion extracellular to periplasm	Transport Outer Membrane Porin	1	-1000	1000	0
CYSItpp	cysi__L[c] -> cysi__L[p]	"	Cystine efflux transport	#N/A	0	0	1000	0
CYSS	h2s[c] + acser[c] -> h[c] + ac[c] + cys__L[c]	ECOLC_RS06775 or ECOLC_RS06745	Cysteine synthase	Cysteine Metabolism	0	0	1000	0
CYSSADS	2 h[c] + 3sala[c] -> ala__L[c] + so2[c]	ECOLC_RS04830	L-cysteine sulfinic acid desulfurase	Cysteine Metabolism	0	0	1000	0
CYSTA	akg[c] + cys__L[c] -> glu__L[c] + mercppyr[c]	"	Cysteine transaminase	#N/A	0	0	1000	0
CYStex	cys__L[e] <=> cys__L[p]	ECOLC_RS17950 or ECOLC_RS14330 or ECOLC_RS12200 or ECOLC_RS07685	L-cysteine transport via diffusion (extracellular to periplasm)	Transport Outer Membrane Porin	1	-1000	1000	0
CYSTL	cyst__L[c] + h2o[c] -> nh4[c] + pyr[c] + hcys__L[c]	ECOLC_RS10790 or ECOLC_RS03655	Cystathionine b-lyase	Methionine Metabolism	0	0	1000	0
CYStpp	cys__L[c] -> cys__L[p]	ECOLC_RS05905 or ECOLC_RS11395	L-cysteine export via facilitated transport	Transport Inner Membrane	0	0	1000	0
CYSTRS	cys__L[c] + atp[c] + trnacys[c] -> ppi[c] + amp[c] + cystrna[c]	ECOLC_RS16660	Cysteinyl-tRNA synthetase	tRNA Charging	0	0	1000	0
CYTBD2pp	2 h[c] + 0.5 o2[c] + mql8[c] -> 2 h[p] + h2o[c] + mqn8[c]	ECOLC_RS14060 and ECOLC_RS14055	Cytochrome oxidase bd (menaquinol-8: 2 protons) (periplasm)	Oxidative Phosphorylation	0	0	1000	0
CYTBDpp	2 h[c] + 0.5 o2[c] + q8h2[c] -> 2 h[p] + h2o[c] + q8[c]	(ECOLC_RS14060 and ECOLC_RS14055) or (ECOLC_RS15700 and ECOLC_RS15695)	Cytochrome oxidase bd (ubiquinol-8: 2 protons) (periplasm)	Oxidative Phosphorylation	0	0	1000	0
CYTBO3_4pp	4 h[c] + 0.5 o2[c] + q8h2[c] -> 4 h[p] + h2o[c] + q8[c]	ECOLC_RS17220 and ECOLC_RS17215 and ECOLC_RS17210 and ECOLC_RS17205	Cytochrome oxidase bo3 (ubiquinol-8: 4 protons) (periplasm)	Oxidative Phosphorylation	0	0	1000	0
CYTD	h[c] + cytd[c] + h2o[c] -> nh4[c] + uri[c]	ECOLC_RS08060	Cytidine deaminase	Nucleotide Salvage Pathway	0	0	1000	0
CYTDH	cytd[c] + h2o[c] -> rib__D[c] + csn[c]	ECOLC_RS07955 or ECOLC_RS16125 or rihC	Cytidine hydrolase	Alternate Carbon Metabolism	0	0	1000	0
CYTDK1	cytd[c] + atp[c] -> h[c] + adp[c] + cmp[c]	"	ATP:cytidine 5-phosphotransferase	Nucleotide Salvage Pathway	0	0	1000	0
CYTDK2	cytd[c] + gtp[c] -> h[c] + gdp[c] + cmp[c]	ECOLC_RS08430	Cytidine kinase (GTP)	Nucleotide Salvage Pathway	0	0	1000	0
CYTDt2pp	h[p] + cytd[p] -> h[c] + cytd[c]	ECOLC_RS06870 or ECOLC_RS03990	Cytidine transport in via proton symport (periplasm)	Transport Inner Membrane	1	-1000	1000	0
CYTDtex	cytd[e] <=> cytd[p]	ECOLC_RS17950 or ECOLC_RS14330 or ECOLC_RS12200 or ECOLC_RS07685	Cytidine transport via diffusion (extracellular to periplasm)	Transport Outer Membrane Porin	1	-1000	1000	0
CYTK1	atp[c] + cmp[c] <=> adp[c] + cdp[c]	ECOLC_RS14430	Cytidylate kinase (CMP)	Nucleotide Salvage Pathway	1	-1000	1000	0
CYTK2	atp[c] + dcmp[c] <=> adp[c] + dcdp[c]	ECOLC_RS14430	Cytidylate kinase (dCMP)	Nucleotide Salvage Pathway	1	-1000	1000	0
D_LACt2pp	h[p] + lac__D[p] <=> h[c] + lac__D[c]	ECOLC_RS00555 or ECOLC_RS03855	D-lactate transport via proton symport (periplasm)	Transport Inner Membrane	1	-1000	1000	0
D_LACtex	lac__D[e] <=> lac__D[p]	ECOLC_RS17950 or ECOLC_RS14330 or ECOLC_RS12200 or ECOLC_RS07685	D-lactate transport via diffusion (extracellular to periplasm)	Transport Outer Membrane Porin	1	-1000	1000	0
DAAD	h2o[c] + ala__D[c] + fad[c] -> fadh2[c] + nh4[c] + pyr[c]	ECOLC_RS13065	D-Amino acid dehydrogenase	Alanine and Aspartate Metabolism	0	0	1000	0
DADA	h[c] + dad_2[c] + h2o[c] -> nh4[c] + din[c]	ECOLC_RS10785	Deoxyadenosine deaminase	Nucleotide Salvage Pathway	0	0	1000	0
DADK	atp[c] + damp[c] <=> dadp[c] + adp[c]	ECOLC_RS16895	Deoxyadenylate kinase	Nucleotide Salvage Pathway	1	-1000	1000	0
DADNt2pp	h[p] + dad_2[p] -> h[c] + dad_2[c]	ECOLC_RS03990 or ECOLC_RS06870	Deoxyadenosine transport in via proton symport (periplasm)	Transport Inner Membrane	0	0	1000	0
DADNtex	dad_2[e] <=> dad_2[p]	ECOLC_RS17310	Deoxyadenosine transport via diffusion (extracellular to periplasm)	Transport Outer Membrane	1	-1000	1000	0
DAGK120	atp[c] + 12dgr120[c] -> h[c] + adp[c] + pa120[c]	ECOLC_RS21425	Diacylglycerol kinase (n-C12:0)	Glycerophospholipid Metabolism	0	0	1000	0
DAGK140	atp[c] + 12dgr140[c] -> h[c] + adp[c] + pa140[c]	ECOLC_RS21425	Diacylglycerol kinase (n-C14:0)	Glycerophospholipid Metabolism	0	0	1000	0
DAGK141	atp[c] + 12dgr141[c] -> h[c] + pa141[c] + adp[c]	ECOLC_RS21425	Diacylglycerol kinase (n-C14:1)	Glycerophospholipid Metabolism	0	0	1000	0
DAGK160	atp[c] + 12dgr160[c] -> h[c] + pa160[c] + adp[c]	ECOLC_RS21425	Diacylglycerol kinase (n-C16:0)	Glycerophospholipid Metabolism	0	0	1000	0
DAGK161	atp[c] + 12dgr161[c] -> h[c] + adp[c] + pa161[c]	ECOLC_RS21425	Diacylglycerol kinase (n-C16:1)	Glycerophospholipid Metabolism	0	0	1000	0
DAGK180	atp[c] + 12dgr180[c] -> h[c] + adp[c] + pa180[c]	ECOLC_RS21425	Diacylglycerol kinase (n-C18:0)	Glycerophospholipid Metabolism	0	0	1000	0
DAGK181	atp[c] + 12dgr181[c] -> h[c] + pa181[c] + adp[c]	ECOLC_RS21425	Diacylglycerol kinase (n-C18:1)	Glycerophospholipid Metabolism	0	0	1000	0
DALAt2pp	h[p] + ala__D[p] -> h[c] + ala__D[c]	ECOLC_RS20425	D-alanine transport in via proton symport (periplasm)	Transport Inner Membrane	0	0	1000	0
DALAtex	ala__D[e] <=> ala__D[p]	ECOLC_RS17950 or ECOLC_RS14330 or ECOLC_RS12200 or ECOLC_RS07685	D-Alanine transport via diffusion (extracellular to periplasm)	Transport Outer Membrane Porin	1	-1000	1000	0
DAMPtex	damp[e] <=> damp[p]	ECOLC_RS17950 or ECOLC_RS14330 or ECOLC_RS12200 or ECOLC_RS07685	DAMP transport via diffusion (extracellular to periplasm)	Transport Outer Membrane Porin	1	-1000	1000	0
DAPabcpp	atp[c] + 26dap__M[p] + h2o[c] -> h[c] + adp[c] + pi[c] + 26dap__M[c]	"	M-diaminopimelic acid ABC transport (periplasm)	Transport Inner Membrane	0	0	1000	0
DAPAL	23dappa[c] + h2o[c] -> 2 nh4[c] + pyr[c]	ECOLC_RS04455	2,3-diaminopropionate amonnia lyase	Alternate Carbon Metabolism	0	0	1000	0
DAPDC	h[c] + 26dap__M[c] -> lys__L[c] + co2[c]	ECOLC_RS04680	Diaminopimelate decarboxylase	Threonine and Lysine Metabolism	0	0	1000	0
DAPE	26dap_LL[c] <=> 26dap__M[c]	ECOLC_RS22640	Diaminopimelate epimerase	Threonine and Lysine Metabolism	1	-1000	1000	0
DAPtex	15dap[e] <=> 15dap[p]	ECOLC_RS17950 or ECOLC_RS14330 or ECOLC_RS12200 or ECOLC_RS07685	1,5-Diaminopentane transport via diffusion (extracellular to periplasm)	Transport Outer Membrane Porin	1	-1000	1000	0
DARBabcpp	h2o[c] + atp[c] + arab__D[p] -> pi[c] + adp[c] + h[c] + arab__D[c]	ECOLC_RS09320 and ECOLC_RS09325 and ECOLC_RS09330	D-arabinose transport via ABC system (periplasm)	Transport Inner Membrane	0	0	1000	0
DARBt2rpp	h[p] + arab__D[p] <=> h[c] + arab__D[c]	ECOLC_RS04665	D-arabinose transport via proton symport (periplasm)	Transport Inner Membrane	1	-1000	1000	0
DARBt3ipp	h[p] + arab__D[c] -> h[c] + arab__D[p]	ECOLC_RS11420	D-arabinose transport via proton antiport (periplasm)	Transport Inner Membrane	0	0	1000	0
DARBtex	arab__D[e] <=> arab__D[p]	ECOLC_RS17950 or ECOLC_RS14330 or ECOLC_RS12200 or ECOLC_RS07685	D-arabinose transport via diffusion (extracellular to periplasm)	Transport Outer Membrane Porin	1	-1000	1000	0
DASYN120	h[c] + ctp[c] + pa120[c] -> cdpdddecg[c] + ppi[c]	ECOLC_RS18730	CDP-diacylglycerol synthetase (n-C12:0)	Glycerophospholipid Metabolism	0	0	1000	0
DASYN140	h[c] + ctp[c] + pa140[c] -> cdpdtdecg[c] + ppi[c]	ECOLC_RS18730	CDP-diacylglycerol synthetase (n-C14:0)	Glycerophospholipid Metabolism	0	0	1000	0
DASYN141	h[c] + pa141[c] + ctp[c] -> cdpdtdec7eg[c] + ppi[c]	ECOLC_RS18730	CDP-diacylglycerol synthetase (n-C14:1)	Glycerophospholipid Metabolism	0	0	1000	0
DASYN160	h[c] + pa160[c] + ctp[c] -> ppi[c] + cdpdhdecg[c]	ECOLC_RS18730	CDP-diacylglycerol synthetase (n-C16:0)	Glycerophospholipid Metabolism	0	0	1000	0
DASYN161	h[c] + ctp[c] + pa161[c] -> cdpdhdec9eg[c] + ppi[c]	ECOLC_RS18730	CDP-diacylglycerol synthetase (n-C16:1)	Glycerophospholipid Metabolism	0	0	1000	0
DASYN180	h[c] + ctp[c] + pa180[c] -> cdpdodecg[c] + ppi[c]	ECOLC_RS18730	CDP-diacylglycerol synthetase (n-C18:0)	Glycerophospholipid Metabolism	0	0	1000	0
DASYN181	h[c] + pa181[c] + ctp[c] -> ppi[c] + cdpdodec11eg[c]	ECOLC_RS18730	CDP-diacylglycerol synthetase (n-C18:1)	Glycerophospholipid Metabolism	0	0	1000	0
DATPHs	h[c] + datp[c] + h2o[c] -> nh4[c] + ditp[c]	s0001	DATP amine hydrolysis (spontaneous)	Nucleotide Salvage Pathway	0	0	1000	0
DB4PS	ru5p__D[c] -> h[c] + db4p[c] + for[c]	ECOLC_RS03485	3,4-Dihydroxy-2-butanone-4-phosphate synthase	Cofactor and Prosthetic Group Biosynthesis	0	0	1000	0
DBTS	atp[c] + dann[c] + co2[c] -> 3 h[c] + adp[c] + pi[c] + dtbt[c]	ECOLC_RS15370	Dethiobiotin synthase	Cofactor and Prosthetic Group Biosynthesis	0	0	1000	0
DC6PDA	chtbs6p[c] + h2o[c] -> ac[c] + mchtbs6p[c]	"	Chito-oligosaccharide mono-deacetylase	Alternate Carbon Metabolism	0	0	1000	0
DC6PH	h2o[c] + chtbs6p[c] -> acgam[c] + acgam6p[c]	ECOLC_RS10205	Diacetylchitobiose-6-phosphate hydrolase	Alternate Carbon Metabolism	0	0	1000	0
DCAtex	dca[e] <=> dca[p]	ECOLC_RS17950 or ECOLC_RS14330 or ECOLC_RS12200 or ECOLC_RS07685	Decanoate transport via diffusion (extracellular to periplasm)	Transport Outer Membrane Porin	1	-1000	1000	0
DCMPtex	dcmp[e] <=> dcmp[p]	ECOLC_RS17950 or ECOLC_RS14330 or ECOLC_RS12200 or ECOLC_RS07685	DCMP transport via diffusion (extracellular to periplasm)	Transport Outer Membrane Porin	1	-1000	1000	0
DCTPD	h[c] + dctp[c] + h2o[c] -> dutp[c] + nh4[c]	ECOLC_RS08435	DCTP deaminase	Nucleotide Salvage Pathway	0	0	1000	0
DCYTD	h[c] + dcyt[c] + h2o[c] -> duri[c] + nh4[c]	ECOLC_RS08060	Deoxycytidine deaminase	Nucleotide Salvage Pathway	0	0	1000	0
DCYTt2pp	dcyt[p] + h[p] -> h[c] + dcyt[c]	ECOLC_RS06870 or ECOLC_RS03990	Deoxycytidine transport in via proton symport (periplasm)	Transport Inner Membrane	0	0	1000	0
DCYTtex	dcyt[e] <=> dcyt[p]	ECOLC_RS17310	Deoxycytidine transport via diffusion (extracellular to periplasm)	Transport Outer Membrane	1	-1000	1000	0
DDCAt2pp	h[p] + ddca[p] -> h[c] + ddca[c]	"	Dodecanoate transport via proton symport	Transport	0	0	1000	0
DDCAtexi	ddca[e] -> ddca[p]	ECOLC_RS07045	Fatty acid (dodecanoate) transport via facilitated irreversible diffusion (extracellular to periplasm)	Transport Outer Membrane	0	0	1000	0
DDGALK	atp[c] + 2dh3dgal[c] -> h[c] + adp[c] + 2dh3dgal6p[c]	ECOLC_RS00050	2-dehydro-3-deoxygalactonokinase	Alternate Carbon Metabolism	0	0	1000	0
DDGLCNt2rpp	h[p] + 2ddglcn[p] <=> h[c] + 2ddglcn[c]	ECOLC_RS22130	2-dehydro-3-deoxy-D-gluconate transport via proton symport, reversible (periplasm)	Transport Inner Membrane	1	-1000	1000	0
DDGLCNtex	2ddglcn[e] <=> 2ddglcn[p]	ECOLC_RS14330 or ECOLC_RS12200 or ECOLC_RS07685 or ECOLC_RS17950	2-dehydro-3-deoxy-D-gluconate transport via diffusion (extracellular to periplasm)	Transport Outer Membrane Porin	1	-1000	1000	0
DDGLK	2ddglcn[c] + atp[c] -> h[c] + adp[c] + 2ddg6p[c]	ECOLC_RS01000	2-dehydro-3-deoxygluconokinase	Alternate Carbon Metabolism	0	0	1000	0
DDPA	pep[c] + e4p[c] + h2o[c] -> pi[c] + 2dda7p[c]	ECOLC_RS05785 or ECOLC_RS15585 or ECOLC_RS10355	3-deoxy-D-arabino-heptulosonate 7-phosphate synthetase	Tyrosine Tryptophan and Phenylalanine Metabolism	0	0	1000	0
DDPGALA	2dh3dgal6p[c] <=> g3p[c] + pyr[c]	ECOLC_RS00055	2-dehydro-3-deoxy-6-phosphogalactonate aldolase	Alternate Carbon Metabolism	1	-1000	1000	0
DGK1	atp[c] + dgmp[c] <=> adp[c] + dgdp[c]	ECOLC_RS00345	Deoxyguanylate kinase (dGMP:ATP)	Nucleotide Salvage Pathway	1	-1000	1000	0
DGMPtex	dgmp[e] <=> dgmp[p]	ECOLC_RS17950 or ECOLC_RS14330 or ECOLC_RS12200 or ECOLC_RS07685	DGMP transport via diffusion (extracellular to periplasm)	Transport Outer Membrane Porin	1	-1000	1000	0
DGSNt2pp	h[p] + dgsn[p] -> h[c] + dgsn[c]	ECOLC_RS03990	Deoxyguanosine transport in via proton symport (periplasm)	Transport Inner Membrane	0	0	1000	0
DGSNtex	dgsn[e] <=> dgsn[p]	ECOLC_RS17950 or ECOLC_RS14330 or ECOLC_RS12200 or ECOLC_RS07685	Deoxyguanosine transport via diffusion (extracellular to periplasm)	Transport Outer Membrane Porin	1	-1000	1000	0
DGUNC	2 gtp[c] -> cdigmp[c] + 2 ppi[c]	"	Diguanylate cyclase	Exchange	0	0	1000	0
DHACOAH	h2o[c] + 23dhacoa[c] <=> 3hadpcoa[c]	ECOLC_RS12115	2,3-dehydroadipyl-CoA hydratase	Alternate Carbon Metabolism	1	-1000	1000	0
DHAD1	23dhmb[c] -> 3mob[c] + h2o[c]	ECOLC_RS22835	Dihydroxy-acid dehydratase (2,3-dihydroxy-3-methylbutanoate)	Valine Leucine and Isoleucine Metabolism	0	0	1000	0
DHAD2	23dhmp[c] -> h2o[c] + 3mop[c]	ECOLC_RS22835	Dihydroxy-acid dehydratase (2,3-dihydroxy-3-methylpentanoate)	Valine Leucine and Isoleucine Metabolism	0	0	1000	0
DHAPT	pep[c] + dha[c] -> dhap[c] + pyr[c]	ECOLC_RS13010 and ECOLC_RS13015 and ECOLC_RS13020 and ECOLC_RS06770 and ECOLC_RS06765	Dihydroxyacetone phosphotransferase	Alternate Carbon Metabolism	0	0	1000	0
DHAtex	dha[e] <=> dha[p]	ECOLC_RS17950 or ECOLC_RS14330 or ECOLC_RS12200 or ECOLC_RS07685	Dihydroxyacetone transport via diffusion (extracellular to periplasm)	Transport Outer Membrane Porin	1	-1000	1000	0
DHAtpp	dha[p] <=> dha[c]	"	Dihydroxyacetone transport via facilitated diffusion (periplasm)	Transport Inner Membrane	1	-1000	1000	0
DHBD	nad[c] + 23ddhb[c] <=> h[c] + 23dhb[c] + nadh[c]	ECOLC_RS16405	2,3-dihydro-2,3-dihydroxybenzoate dehydrogenase	Cofactor and Prosthetic Group Biosynthesis	1	-1000	1000	0
DHBS	h[c] + atp[c] + 23dhb[c] -> 23dhba[c] + ppi[c]	ECOLC_RS16415	2,3-dihydroxybenzoate adenylate synthase	Cofactor and Prosthetic Group Biosynthesis	0	0	1000	0
DHBSH	h2o[c] + 23dhbzs[c] -> ser__L[c] + 23dhb[c]	"	2,3-dihydroxybenzoylserine hydrolase	Cofactor and Prosthetic Group Biosynthesis	0	0	1000	0
DHBSZ3FEabcpp	atp[c] + h2o[c] + fe3dhbzs3[p] -> h[c] + adp[c] + pi[c] + fe3dhbzs3[c]	"	23dhbsz3 Fe III transport via ABC system periplasm	#N/A	0	0	1000	0
DHCIND	nad[c] + cenchddd[c] -> h[c] + dhcinnm[c] + nadh[c]	ECOLC_RS06115	2,3-dihydroxycinnamate dehydrogenase	Alternate Carbon Metabolism	0	0	1000	0
DHCINDO	o2[c] + dhcinnm[c] -> h[c] + hkntd[c]	ECOLC_RS17605	2,3-dihydroxycinnamate 1,2-dioxygenase	Alternate Carbon Metabolism	0	0	1000	0
DHCURR	h[c] + nadph[c] + dhcur[c] -> nadp[c] + thcur[c]	"	NADPH-dependent dihydrocurcumin reductase	Alternate Carbon Metabolism	0	0	1000	0
DHDPRy	h[c] + nadph[c] + 23dhdp[c] -> nadp[c] + thdp[c]	ECOLC_RS19460	Dihydrodipicolinate reductase (NADPH)	Threonine and Lysine Metabolism	0	0	1000	0
DHDPS	aspsa[c] + pyr[c] -> h[c] + 2 h2o[c] + 23dhdp[c]	ECOLC_RS06435	Dihydrodipicolinate synthase	Threonine and Lysine Metabolism	0	0	1000	0
DHEDAA	24dhhed[c] -> sucsal[c] + pyr[c]	"	2,4-dihydroxyhept-2-ene-1,7-dioic acid aldolase	Alternate Carbon metabolism	0	0	1000	0
DHFR	h[c] + nadph[c] + dhf[c] <=> thf[c] + nadp[c]	ECOLC_RS10870 or ECOLC_RS19360	Dihydrofolate reductase	Cofactor and Prosthetic Group Biosynthesis	1	-1000	1000	0
DHFS	atp[c] + glu__L[c] + dhpt[c] -> h[c] + adp[c] + pi[c] + dhf[c]	ECOLC_RS07185	Dihydrofolate synthase	Cofactor and Prosthetic Group Biosynthesis	0	0	1000	0
DHGLYH	h[c] + h2o[c] + dhgly[c] -> glx[c] + nh4[c]	"	Dehydroglycine Hydratase	#N/A	0	0	1000	0
DHMPTR	h[c] + dhmpt[c] + nadph[c] -> thmnp[c] + nadp[c]	ECOLC_RS10870	Dihydromonapterin reductase	Cofactor and Prosthetic Group Biosynthesis	0	0	1000	0
DHNAOT4	h[c] + dhna[c] + octdp[c] -> ppi[c] + 2dmmql8[c] + co2[c]	ECOLC_RS22030	1,4-dihydroxy-2-naphthoate octaprenyltransferase	Cofactor and Prosthetic Group Biosynthesis	0	0	1000	0
DHNCOAS	h[c] + sbzcoa[c] -> h2o[c] + 14dhncoa[c]	ECOLC_RS07435	1,4-dihydroxy-2-napthoyl-CoA synthase	Cofactor and Prosthetic Group Biosynthesis	0	0	1000	0
DHNCOAT	h2o[c] + 14dhncoa[c] -> h[c] + dhna[c] + coa[c]	ECOLC_RS15680	1,4-dihydroxy-2-napthoyl-CoA thioesterase	Cofactor and Prosthetic Group Biosynthesis	0	0	1000	0
DHNPA2r	dhnpt[c] <=> 6hmhpt[c] + gcald[c]	ECOLC_RS03395	Dihydroneopterin aldolase reversible	Cofactor and Prosthetic Group Biosynthesis	1	-1000	1000	0
DHNPTE	dhnpt[c] <=> dhmpt[c]	ECOLC_RS03395	Dihydroneopterin epimerase	Cofactor and Prosthetic Group Biosynthesis	1	-1000	1000	0
DHORD2	dhor__S[c] + q8[c] -> q8h2[c] + orot[c]	ECOLC_RS14250	Dihydoorotic acid dehydrogenase (quinone8)	Purine and Pyrimidine Biosynthesis	0	0	1000	0
DHORD5	dhor__S[c] + mqn8[c] -> orot[c] + mql8[c]	ECOLC_RS14250	Dihydroorotic acid (menaquinone-8)	Purine and Pyrimidine Biosynthesis	0	0	1000	0
DHORDfum	dhor__S[c] + fum[c] -> orot[c] + succ[c]	"	Fumarate dependent DHORD	Purine and Pyrimidine Biosynthesis	0	0	1000	0
DHORTS	dhor__S[c] + h2o[c] <=> h[c] + cbasp[c]	ECOLC_RS13610	Dihydroorotase	Purine and Pyrimidine Biosynthesis	1	-1000	1000	0
DHPDO	o2[c] + 34dhpha[c] -> h[c] + 5cmhmsa[c]	ECOLC_RS19910	3 4 dihydroxyphenylacetate 2 3 dioxygenase	4 hydroxyphenylacetate catabolism	0	0	1000	0
DHPPD	nad[c] + cechddd[c] -> h[c] + dhpppn[c] + nadh[c]	ECOLC_RS06115	2,3-dihydroxyphenylpropionate dehydrogenase	Alternate Carbon Metabolism	0	0	1000	0
DHPPDA2	h[c] + h2o[c] + 25drapp[c] -> 5apru[c] + nh4[c]	ECOLC_RS17295	Diaminohydroxyphosphoribosylaminopryrimidine deaminase (25drapp)	Cofactor and Prosthetic Group Biosynthesis	0	0	1000	0
DHPS2	6hmhptpp[c] + 4abz[c] -> ppi[c] + dhpt[c]	ECOLC_RS02775	Dihydropteroate synthase	Cofactor and Prosthetic Group Biosynthesis	0	0	1000	0
DHPTDCs	dhptd[c] -> h2o[c] + hmfurn[c]	s0001	4,5-dihydroxy-2,3-pentanedione cyclization (spontaneous)	Methionine Metabolism	0	0	1000	0
DHPTDCs2	dhptd[c] -> mdhdhf[c]	s0001	4,5-dihydroxy-2,3-pentanedione cyclization (spontaneous)	Methionine Metabolism	0	0	1000	0
DHPTDNR	3 h[c] + nadph[c] + dhptdn[c] -> thptdn[c] + nadp[c]	ECOLC_RS16510	Dihydropteridine reductase	Alternate Carbon Metabolism	0	0	1000	0
DHPTDNRN	3 h[c] + dhptdn[c] + nadh[c] -> nad[c] + thptdn[c]	ECOLC_RS16510	Dihydropteridine reductase (NADH)	Alternate Carbon Metabolism	0	0	1000	0
DHPTPE	ahdt[c] <=> dhmptp[c]	ECOLC_RS07245	Dihydroneopterin triphosphate 2-epimerase	Cofactor and Prosthetic Group Biosynthesis	1	-1000	1000	0
DHQS	2dda7p[c] -> pi[c] + 3dhq[c]	ECOLC_RS01725	3-dehydroquinate synthase	Tyrosine Tryptophan and Phenylalanine Metabolism	0	0	1000	0
DHQTi	3dhq[c] -> 3dhsk[c] + h2o[c]	ECOLC_RS10420	3-dehydroquinate dehydratase, irreversible	Tyrosine Tryptophan and Phenylalanine Metabolism	0	0	1000	0
DIMPtex	dimp[e] <=> dimp[p]	ECOLC_RS17950 or ECOLC_RS14330 or ECOLC_RS12200 or ECOLC_RS07685	DIMP transport via diffusion (extracellular to periplasm)	Transport Outer Membrane Porin	1	-1000	1000	0
DINSt2pp	din[p] + h[p] -> h[c] + din[c]	ECOLC_RS03990	Deoxyinosine transport in via proton symport (periplasm)	Transport Inner Membrane	0	0	1000	0
DINStex	din[e] <=> din[p]	ECOLC_RS17950 or ECOLC_RS14330 or ECOLC_RS12200 or ECOLC_RS07685	Deoxyinosine transport via diffusion (extracellular to periplasm)	Transport Outer Membrane Porin	1	-1000	1000	0
DKGLCNR1	h[c] + 25dkglcn[c] + nadph[c] -> 2dhguln[c] + nadp[c]	ECOLC_RS18565 or ECOLC_RS03630	2,5-diketo-D-gluconate reductase	Alternate Carbon Metabolism	0	0	1000	0
DKGLCNR2x	h[c] + 25dkglcn[c] + nadh[c] -> nad[c] + 5dglcn[c]	ECOLC_RS00845	2,5-diketo-D-gluconate reductase (NADH)	Alternate Carbon Metabolism	0	0	1000	0
DM_4crsol	4crsol[c] ->	"	Sink needed to allow p-Cresol to leave system	Intracellular demand	0	0	1000	0
DM_5drib	5drib[c] ->	"	Sink needed to allow 5-deoxyribose to leave system	Intracellular demand	0	0	1000	0
DM_aacald	aacald[c] ->	"	Sink needed to allow aminoacetaldehyde to leave system	Intracellular demand	0	0	1000	0
DM_amob	amob[c] ->	"	Sink needed to allow S-Adenosyl-4-methylthio-2-oxobutanoate to leave system	Intracellular demand	0	0	1000	0
DM_lipidA_core_e_p	lipidA_core_e[p] ->	"	Core lipidA exhcnage	Intracellular demand	0	0	1000	0
DM_mththf	mththf[c] ->	"	Sink needed to allow (2R,4S)-2-methyl-2,3,3,4-tetrahydroxytetrahydrofuran to leave system	Intracellular demand	0	0	1000	0
DM_oxam	oxam[c] ->	"	Sink needed to allow oxamate to leave system	Intracellular demand	0	0	1000	0
DMATT	ipdp[c] + dmpp[c] -> grdp[c] + ppi[c]	ECOLC_RS17260	Dimethylallyltranstransferase	Cofactor and Prosthetic Group Biosynthesis	0	0	1000	0
DMPPS	h[c] + h2mb4p[c] + nadh[c] -> nad[c] + h2o[c] + dmpp[c]	ECOLC_RS19470	1-hydroxy-2-methyl-2-(E)-butenyl 4-diphosphate reductase (dmpp)	Cofactor and Prosthetic Group Biosynthesis	0	0	1000	0
DMQMT	amet[c] + 2omhmbl[c] -> h[c] + q8h2[c] + ahcys[c]	ECOLC_RS07600	3-Dimethylubiquinonol 3-methyltransferase	Cofactor and Prosthetic Group Biosynthesis	0	0	1000	0
DMSOR1	mql8[c] + dmso[c] -> h2o[c] + dms[c] + mqn8[c]	(ECOLC_RS10970 and ECOLC_RS10965 and ECOLC_RS10960 and ECOLC_RS10955) or (ECOLC_RS14510 and ECOLC_RS14505 and ECOLC_RS14500)	Dimethyl sulfoxide reductase (Menaquinol 8)	Oxidative Phosphorylation	0	0	1000	0
DMSOR1pp	dmso[p] + mql8[c] -> h2o[p] + dms[p] + mqn8[c]	ECOLC_RS09450 and ECOLC_RS09445	Dimethyl sulfoxide reductase (Menaquinol 8) (periplasm)	Oxidative Phosphorylation	0	0	1000	0
DMSOR2	2dmmql8[c] + dmso[c] -> 2dmmq8[c] + h2o[c] + dms[c]	ECOLC_RS14510 and ECOLC_RS14505 and ECOLC_RS14500	Dimethyl sulfoxide reductase (Demethylmenaquinol 8)	Oxidative Phosphorylation	0	0	1000	0
DMSOR2pp	dmso[p] + 2dmmql8[c] -> h2o[p] + dms[p] + 2dmmq8[c]	ECOLC_RS09450 and ECOLC_RS09445	Dimethyl sulfoxide reductase (Demethylmenaquinol 8) (periplasm)	Oxidative Phosphorylation	0	0	1000	0
DMSOtex	dmso[e] <=> dmso[p]	ECOLC_RS17950 or ECOLC_RS14330 or ECOLC_RS12200 or ECOLC_RS07685	Dimethyl sulfoxide transport via diffusion (extracellular to periplasm)	Transport Outer Membrane Porin	1	-1000	1000	0
DMSOtpp	dmso[p] <=> dmso[c]	s0001	Dimethyl sulfoxide transport via diffusion (periplasm)	Transport Inner Membrane	1	-1000	1000	0
DMStex	dms[e] <=> dms[p]	ECOLC_RS17950 or ECOLC_RS14330 or ECOLC_RS12200 or ECOLC_RS07685	Dimethyl sulfide transport via diffusion (extracellular to periplasm)	Transport Outer Membrane Porin	1	-1000	1000	0
DNMPPA	dhpmp[c] + h2o[c] -> pi[c] + dhnpt[c]	"	Dihydroneopterin monophosphate dephosphorylase	Cofactor and Prosthetic Group Biosynthesis	0	0	1000	0
DNTPPA	h2o[c] + ahdt[c] -> h[c] + dhpmp[c] + ppi[c]	ECOLC_RS19110 or ECOLC_RS09485	Dihydroneopterin triphosphate pyrophosphatase	Cofactor and Prosthetic Group Biosynthesis	0	0	1000	0
DOGULNR	h[c] + 23doguln[c] + nadh[c] -> nad[c] + 3dhguln[c]	ECOLC_RS00720	2,3 dioxo-L-gulonate reductase	Alternate Carbon Metabolism	0	0	1000	0
DOPAtex	dopa[e] <=> dopa[p]	ECOLC_RS17950 or ECOLC_RS14330 or ECOLC_RS12200 or ECOLC_RS07685	Dopamine transport via diffusion (extracellular to periplasm)	Transport Outer Membrane Porin	1	-1000	1000	0
DOXRBCNtex	doxrbcn[e] <=> doxrbcn[p]	ECOLC_RS12200 or ECOLC_RS07685 or ECOLC_RS14330 or ECOLC_RS17950	Doxorubicin transport via diffusion (extracellular to periplasm)	Transport Outer Membrane Porin	1	-1000	1000	0
DOXRBCNtpp	h[p] + doxrbcn[p] -> h[c] + doxrbcn[e]	(ECOLC_RS16955 and ECOLC_RS16960 and ECOLC_RS03520) or (ECOLC_RS16955 and ECOLC_RS06490 and ECOLC_RS03520)	Doxorubicin transport via TolC system	Transport Outer Membrane	0	0	1000	0
DPCOAK	atp[c] + dpcoa[c] -> h[c] + adp[c] + coa[c]	ECOLC_RS19090	Dephospho-CoA kinase	Cofactor and Prosthetic Group Biosynthesis	0	0	1000	0
DPR	h[c] + 2dhp[c] + nadph[c] -> nadp[c] + pant__R[c]	ECOLC_RS17240 or ECOLC_RS22820	2-dehydropantoate 2-reductase	Cofactor and Prosthetic Group Biosynthesis	0	0	1000	0
DRIBtex	drib[e] <=> drib[p]	"	Deoxyribose transport via diffusion extracellular to periplasm	Transport Outer Membrane Porin	1	-1000	1000	0
DRPA	2dr5p[c] -> g3p[c] + acald[c]	ECOLC_RS19740	Deoxyribose-phosphate aldolase	Alternate Carbon Metabolism	0	0	1000	0
DSBAO1	dsbard[p] + q8[c] -> q8h2[c] + dsbaox[p]	ECOLC_RS22395 and ECOLC_RS13085	DsbA protein reoxidation reaction (aerobic)	Unassigned	0	0	1000	0
DSBAO2	dsbard[p] + mqn8[c] -> dsbaox[p] + mql8[c]	ECOLC_RS22395 and ECOLC_RS13085	DsbA protein reoxidation reaction (anaerobic)	Unassigned	0	0	1000	0
DSBCGT	dsbcox[p] + 2 gthrd[p] -> dsbcrd[p] + gthox[p]	ECOLC_RS04340	DsbC:glutathione thiotransferase	Unassigned	0	0	1000	0
DSBDR	dsbdox[c] + trdrd[c] -> dsbdrd[c] + trdox[c]	(ECOLC_RS20840 and ECOLC_RS05880) or (ECOLC_RS20840 and ECOLC_RS22790)	DsbD reductase	Unassigned	0	0	1000	0
DSBGGT	dsbgox[p] + 2 gthrd[p] -> gthox[p] + dsbgrd[p]	ECOLC_RS16360	DsbG:glutathione thiotransferase	Unassigned	0	0	1000	0
DSCLCOCH	cobalt2[c] + dscl[c] -> 2 h[c] + copre2[c]	"	Sirohydrochlorin cobaltochelatase	Cofactor and Prosthetic Group Biosynthesis	0	0	1000	0
DSERDHr	nadp[c] + ser__D[c] <=> h[c] + 2amsa[c] + nadph[c]	ECOLC_RS11360	D-serine dehydrogenase	Glycine and Serine Metabolism	1	-1000	1000	0
DSERt2pp	h[p] + ser__D[p] -> h[c] + ser__D[c]	ECOLC_RS20425	D-serine transport in via proton symport (periplasm)	Transport Inner Membrane	0	0	1000	0
DSERtex	ser__D[e] <=> ser__D[p]	ECOLC_RS17950 or ECOLC_RS14330 or ECOLC_RS12200 or ECOLC_RS07685	D-serine transport via diffusion (extracellular to periplasm)	Transport Outer Membrane Porin	1	-1000	1000	0
DTARTD	tartr__D[c] -> h2o[c] + oaa[c]	ECOLC_RS21005	D(-)-tartrate dehydratase	Alternate Carbon Metabolism	0	0	1000	0
DTMPK	atp[c] + dtmp[c] <=> adp[c] + dtdp[c]	ECOLC_RS13430	DTMP kinase	Nucleotide Salvage Pathway	1	-1000	1000	0
DTMPtex	dtmp[e] <=> dtmp[p]	ECOLC_RS17950 or ECOLC_RS14330 or ECOLC_RS12200 or ECOLC_RS07685	DTMP transport via diffusion (extracellular to periplasm)	Transport Outer Membrane Porin	1	-1000	1000	0
DUMPtex	dump[e] <=> dump[p]	ECOLC_RS17950 or ECOLC_RS14330 or ECOLC_RS12200 or ECOLC_RS07685	DUMP transport via diffusion (extracellular to periplasm)	Transport Outer Membrane Porin	1	-1000	1000	0
DURADx	nad[c] + 56dura[c] <=> h[c] + ura[c] + nadh[c]	ECOLC_RS08040 and ECOLC_RS08045	Dihydrouracil dehydrogenase (NAD)	Nucleotide Salvage Pathway	1	-1000	1000	0
DURIK1	duri[c] + atp[c] -> h[c] + adp[c] + dump[c]	ECOLC_RS12800	Deoxyuridine kinase (ATP:Deoxyuridine)	Nucleotide Salvage Pathway	0	0	1000	0
DURIPP	duri[c] + pi[c] <=> 2dr1p[c] + ura[c]	ECOLC_RS19735 or ECOLC_RS19725	Deoxyuridine phosphorylase	Nucleotide Salvage Pathway	1	-1000	1000	0
DURIt2pp	h[p] + duri[p] -> h[c] + duri[c]	ECOLC_RS03990 or ECOLC_RS06870	Deoxyuridine transport in via proton symport (periplasm)	Transport Inner Membrane	0	0	1000	0
DURItex	duri[e] <=> duri[p]	ECOLC_RS17310	Deoxyuridine transport via diffusion (extracellular to periplasm)	Transport Outer Membrane	1	-1000	1000	0
DUTPDP	dutp[c] + h2o[c] -> h[c] + ppi[c] + dump[c]	ECOLC_RS00385 or ECOLC_RS07495	DUTP diphosphatase	Nucleotide Salvage Pathway	0	0	1000	0
DXPRIi	h[c] + dxyl5p[c] + nadph[c] -> 2me4p[c] + nadp[c]	ECOLC_RS18740	1-deoxy-D-xylulose reductoisomerase	Cofactor and Prosthetic Group Biosynthesis	0	0	1000	0
DXPS	h[c] + g3p[c] + pyr[c] -> dxyl5p[c] + co2[c]	ECOLC_RS17265	1-deoxy-D-xylulose 5-phosphate synthase	Cofactor and Prosthetic Group Biosynthesis	0	0	1000	0
DXYLK	dxyl[c] + atp[c] -> h[c] + adp[c] + dxyl5p[c]	ECOLC_RS00780	1-Deoxy-D-xylulose kinase	Cofactor and Prosthetic Group Biosynthesis	0	0	1000	0
DXYLONtex	dxylnt[e] <=> dxylnt[p]	"	D-xylonate transport via diffusion (extracellular)	Transport Outer Membrane Porin	1	-1000	1000	0
DXYLONtpp	dxylnt[p] <=> dxylnt[c]	"	D-xylonate reversible tranposrt (periplasm)	#N/A	1	-1000	1000	0
DXYLUDtex	dxyl[e] <=> dxyl[p]	"	1-deoxy-d-xyluose transport	Transport	1	-1000	1000	0
DXYLUDtpp	h[p] + dxyl[p] -> h[c] + dxyl[c]	"	1-deoxy-d-xyluose transport	Transport Inner Membrane	0	0	1000	0
E4PD	nad[c] + e4p[c] + h2o[c] <=> 2 h[c] + nadh[c] + 4per[c]	ECOLC_RS04175 or ECOLC_RS09965	Erythrose 4-phosphate dehydrogenase	Cofactor and Prosthetic Group Biosynthesis	1	-1000	1000	0
E4PP	e4p[c] + h2o[c] -> pi[c] + erthrs[c]	"	Erythrose-4-phosphate phosphatase	Alternate Carbon Metabolism	0	0	1000	0
EAR100x	h[c] + tdec2eACP[c] + nadh[c] -> nad[c] + dcaACP[c]	ECOLC_RS12515	Enoyl-[acyl-carrier-protein] reductase (NADH) (n-C10:0)	Cell Envelope Biosynthesis	0	0	1000	0
EAR100y	h[c] + tdec2eACP[c] + nadph[c] -> nadp[c] + dcaACP[c]	ECOLC_RS12515	Enoyl-[acyl-carrier-protein] reductase (NADPH) (n-C10:0)	Cell Envelope Biosynthesis	0	0	1000	0
EAR120x	h[c] + tddec2eACP[c] + nadh[c] -> nad[c] + ddcaACP[c]	ECOLC_RS12515	Enoyl-[acyl-carrier-protein] reductase (NADH) (n-C12:0)	Cell Envelope Biosynthesis	0	0	1000	0
EAR120y	h[c] + tddec2eACP[c] + nadph[c] -> nadp[c] + ddcaACP[c]	ECOLC_RS12515	Enoyl-[acyl-carrier-protein] reductase (NADPH) (n-C12:0)	Cell Envelope Biosynthesis	0	0	1000	0
EAR121x	h[c] + t3c5ddeceACP[c] + nadh[c] -> nad[c] + cddec5eACP[c]	ECOLC_RS12515	Enoyl-[acyl-carrier-protein] reductase (NADH) (n-C12:1)	Cell Envelope Biosynthesis	0	0	1000	0
EAR121y	h[c] + t3c5ddeceACP[c] + nadph[c] -> nadp[c] + cddec5eACP[c]	ECOLC_RS12515	Enoyl-[acyl-carrier-protein] reductase (NADPH) (n-C12:1)	Cell Envelope Biosynthesis	0	0	1000	0
EAR140x	h[c] + tmrs2eACP[c] + nadh[c] -> nad[c] + myrsACP[c]	ECOLC_RS12515	Enoyl-[acyl-carrier-protein] reductase (NADH) (n-C14:0)	Cell Envelope Biosynthesis	0	0	1000	0
EAR140y	h[c] + tmrs2eACP[c] + nadph[c] -> nadp[c] + myrsACP[c]	ECOLC_RS12515	Enoyl-[acyl-carrier-protein] reductase (NADPH) (n-C14:0)	Cell Envelope Biosynthesis	0	0	1000	0
EAR141x	h[c] + t3c7mrseACP[c] + nadh[c] -> nad[c] + tdeACP[c]	ECOLC_RS12515	Enoyl-[acyl-carrier-protein] reductase (NADH) (n-C14:1)	Cell Envelope Biosynthesis	0	0	1000	0
EAR141y	h[c] + t3c7mrseACP[c] + nadph[c] -> tdeACP[c] + nadp[c]	ECOLC_RS12515	Enoyl-[acyl-carrier-protein] reductase (NADPH) (n-C14:1)	Cell Envelope Biosynthesis	0	0	1000	0
EAR160x	h[c] + tpalm2eACP[c] + nadh[c] -> nad[c] + palmACP[c]	ECOLC_RS12515	Enoyl-[acyl-carrier-protein] reductase (NADH) (n-C16:0)	Cell Envelope Biosynthesis	0	0	1000	0
EAR160y	h[c] + tpalm2eACP[c] + nadph[c] -> nadp[c] + palmACP[c]	ECOLC_RS12515	Enoyl-[acyl-carrier-protein] reductase (NADPH) (n-C16:0)	Cell Envelope Biosynthesis	0	0	1000	0
EAR161x	h[c] + t3c9palmeACP[c] + nadh[c] -> nad[c] + hdeACP[c]	ECOLC_RS12515	Enoyl-[acyl-carrier-protein] reductase (NADH) (n-C16:1)	Cell Envelope Biosynthesis	0	0	1000	0
EAR161y	h[c] + t3c9palmeACP[c] + nadph[c] -> hdeACP[c] + nadp[c]	ECOLC_RS12515	Enoyl-[acyl-carrier-protein] reductase (NADPH) (n-C16:1)	Cell Envelope Biosynthesis	0	0	1000	0
EAR180x	h[c] + toctd2eACP[c] + nadh[c] -> nad[c] + ocdcaACP[c]	ECOLC_RS12515	Enoyl-[acyl-carrier-protein] reductase (NADH) (n-C18:0)	Cell Envelope Biosynthesis	0	0	1000	0
EAR180y	h[c] + toctd2eACP[c] + nadph[c] -> nadp[c] + ocdcaACP[c]	ECOLC_RS12515	Enoyl-[acyl-carrier-protein] reductase (NADPH) (n-C18:0)	Cell Envelope Biosynthesis	0	0	1000	0
EAR181x	h[c] + t3c11vaceACP[c] + nadh[c] -> nad[c] + octeACP[c]	ECOLC_RS12515	Enoyl-[acyl-carrier-protein] reductase (NADH) (n-C18:1)	Cell Envelope Biosynthesis	0	0	1000	0
EAR181y	h[c] + t3c11vaceACP[c] + nadph[c] -> nadp[c] + octeACP[c]	ECOLC_RS12515	Enoyl-[acyl-carrier-protein] reductase (NADPH) (n-C18:1)	Cell Envelope Biosynthesis	0	0	1000	0
EAR40x	h[c] + but2eACP[c] + nadh[c] -> nad[c] + butACP[c]	ECOLC_RS12515	Enoyl-[acyl-carrier-protein] reductase (NADH) (n-C4:0)	Cell Envelope Biosynthesis	0	0	1000	0
EAR40y	h[c] + nadph[c] + but2eACP[c] -> butACP[c] + nadp[c]	ECOLC_RS12515	Enoyl-[acyl-carrier-protein] reductase (NADPH) (n-C4:0)	Cell Envelope Biosynthesis	0	0	1000	0
EAR60x	h[c] + thex2eACP[c] + nadh[c] -> nad[c] + hexACP[c]	ECOLC_RS12515	Enoyl-[acyl-carrier-protein] reductase (NADH) (n-C6:0)	Cell Envelope Biosynthesis	0	0	1000	0
EAR60y	h[c] + thex2eACP[c] + nadph[c] -> hexACP[c] + nadp[c]	ECOLC_RS12515	Enoyl-[acyl-carrier-protein] reductase (NADPH) (n-C6:0)	Cell Envelope Biosynthesis	0	0	1000	0
EAR80x	h[c] + toct2eACP[c] + nadh[c] -> nad[c] + ocACP[c]	ECOLC_RS12515	Enoyl-[acyl-carrier-protein] reductase (NADH) (n-C8:0)	Cell Envelope Biosynthesis	0	0	1000	0
EAR80y	h[c] + toct2eACP[c] + nadph[c] -> ocACP[c] + nadp[c]	ECOLC_RS12515	Enoyl-[acyl-carrier-protein] reductase (NADPH) (n-C8:0)	Cell Envelope Biosynthesis	0	0	1000	0
ECA4COLIPAabctex	atp[c] + eca4colipa[p] + h2o[c] -> h[c] + adp[c] + pi[c] + eca4colipa[e]	ECOLC_RS02660 and ECOLC_RS02655 and ECOLC_RS02665 and ECOLC_RS20180 and ECOLC_RS20175	Enterobacterial common antigen (x4) core oligosaccharide lipid A transport via ABC system (periplasm to extracellular)	Lipopolysaccharide Biosynthesis / Recycling	0	0	1000	0
ECA4OALpp	eca4und[p] + colipa[p] -> udcpdp[p] + h[p] + eca4colipa[p]	"	Enterobacterial common antigen (x4) O-antigen ligase (periplasm)	Lipopolysaccharide Biosynthesis / Recycling	0	0	1000	0
ECAP1pp	2 unagamuf[p] -> udcpdp[p] + h[p] + eca2und[p]	ECOLC_RS22720 and ECOLC_RS22765	Enterobacterial common antigen polymerase (periplasm)	Lipopolysaccharide Biosynthesis / Recycling	0	0	1000	0
ECAP2pp	unagamuf[p] + eca2und[p] -> udcpdp[p] + h[p] + eca3und[p]	ECOLC_RS22720 and ECOLC_RS22765	Enterobacterial common antigen polymerase (periplasm)	Lipopolysaccharide Biosynthesis / Recycling	0	0	1000	0
ECAP3pp	eca3und[p] + unagamuf[p] -> eca4und[p] + udcpdp[p] + h[p]	ECOLC_RS22720 and ECOLC_RS22765	Enterobacterial common antigen polymerase (periplasm)	Lipopolysaccharide Biosynthesis / Recycling	0	0	1000	0
ECAtpp	unagamuf[c] -> unagamuf[p]	ECOLC_RS22730	Enterobacterial common antigen transferase (flippase, cytoplasm to periplasm)	Lipopolysaccharide Biosynthesis / Recycling	0	0	1000	0
ECOAH1	3hbcoa[c] <=> h2o[c] + b2coa[c]	ECOLC_RS22465 or ECOLC_RS07060	3-hydroxyacyl-CoA dehydratase (3-hydroxybutanoyl-CoA)	Membrane Lipid Metabolism	1	-1000	1000	0
ECOAH2	3hhcoa[c] <=> hx2coa[c] + h2o[c]	ECOLC_RS22465 or ECOLC_RS07060	3-hydroxyacyl-CoA dehydratase (3-hydroxyhexanoyl-CoA)	Membrane Lipid Metabolism	1	-1000	1000	0
ECOAH3	3hocoa[c] <=> h2o[c] + oc2coa[c]	ECOLC_RS22465 or ECOLC_RS07060	3-hydroxyacyl-CoA dehydratase (3-hydroxyoctanoyl-CoA)	Membrane Lipid Metabolism	1	-1000	1000	0
ECOAH4	3hdcoa[c] <=> dc2coa[c] + h2o[c]	ECOLC_RS22465 or ECOLC_RS07060	3-hydroxyacyl-CoA dehydratase (3-hydroxydecanoyl-CoA)	Membrane Lipid Metabolism	1	-1000	1000	0
ECOAH5	3hddcoa[c] <=> h2o[c] + dd2coa[c]	ECOLC_RS22465 or ECOLC_RS07060	3-hydroxyacyl-CoA dehydratase (3-hydroxydodecanoyl-CoA)	Membrane Lipid Metabolism	1	-1000	1000	0
ECOAH6	3htdcoa[c] <=> h2o[c] + td2coa[c]	ECOLC_RS22465 or ECOLC_RS07060	3-hydroxyacyl-CoA dehydratase (3-hydroxytetradecanoyl-CoA)	Membrane Lipid Metabolism	1	-1000	1000	0
ECOAH7	3hhdcoa[c] <=> h2o[c] + hdd2coa[c]	ECOLC_RS22465 or ECOLC_RS07060	3-hydroxyacyl-CoA dehydratase (3-hydroxyhexadecanoyl-CoA)	Membrane Lipid Metabolism	1	-1000	1000	0
ECOAH8	3hodcoa[c] <=> od2coa[c] + h2o[c]	ECOLC_RS22465 or ECOLC_RS07060	3-hydroxyacyl-CoA dehydratase (3-hydroxyoctadecanoyl-CoA)	Membrane Lipid Metabolism	1	-1000	1000	0
EDA	2ddg6p[c] -> g3p[c] + pyr[c]	ECOLC_RS09565	2-dehydro-3-deoxy-phosphogluconate aldolase	Pentose Phosphate Pathway	0	0	1000	0
EDD	6pgc[c] -> h2o[c] + 2ddg6p[c]	ECOLC_RS09560	6-phosphogluconate dehydratase	Pentose Phosphate Pathway	0	0	1000	0
EDTXS1	ddcaACP[c] + kdo2lipid4[c] -> kdo2lipid4L[c] + ACP[c]	ECOLC_RS13650	Endotoxin Synthesis (lauroyl transferase)	Lipopolysaccharide Biosynthesis / Recycling	0	0	1000	0
EDTXS2	kdo2lipid4L[c] + myrsACP[c] -> lipa[c] + ACP[c]	ECOLC_RS09535	Endotoxin Synthesis (myristoyl transferase)	Lipopolysaccharide Biosynthesis / Recycling	0	0	1000	0
EDTXS3	hdeACP[c] + kdo2lipid4[c] -> kdo2lipid4p[c] + ACP[c]	ECOLC_RS06945	Endotoxin Synthesis (palmitoleoyl ACP)	Lipopolysaccharide Biosynthesis / Recycling	0	0	1000	0
EDTXS4	kdo2lipid4p[c] + myrsACP[c] -> lipa_cold[c] + ACP[c]	ECOLC_RS09535	Endotoxin Synthesis (myristoyl transferase)	Lipopolysaccharide Biosynthesis / Recycling	0	0	1000	0
EGMEACPR	h[c] + egmeACP[c] + nadph[c] -> gmeACP[c] + nadp[c]	ECOLC_RS12515	Enoylglutaryl-[ACP] methyl ester reductase	Cofactor and Prosthetic Group Biosynthesis	0	0	1000	0
ENLIPAabctex	atp[c] + enlipa[p] + h2o[c] -> h[c] + adp[c] + pi[c] + enlipa[e]	ECOLC_RS02660 and ECOLC_RS02655 and ECOLC_RS02665 and ECOLC_RS20180 and ECOLC_RS20175	Phosphoethanolamine lipid A transport via ABC system (periplasm to extracellular)	Lipopolysaccharide Biosynthesis / Recycling	0	0	1000	0
ENLIPIDAt1ex	LptA[p] + enlipidA[p] -> enlipidA_LptA[p]	(ECOLC_RS02655 and ECOLC_RS20180 and ECOLC_RS20175) or (ECOLC_RS02655 and ECOLC_RS20180 and ECOLC_RS20175 and ECOLC_RS02665)	Phosphoethanolamine lipid IVa transport via vector periplasm to extracellular	S_Lipopolysaccharide_Biosynthesis_Recycling	0	0	1000	0
ENLIPIDAt2ex	enlipidA_LptA[p] -> LptA[p] + enlipidA[e]	ECOLC_RS19330 and ECOLC_RS16175	Phosphoethanolamine lipid IVa transport via vector periplasm to extracellular	S_Lipopolysaccharide_Biosynthesis_Recycling	0	0	1000	0
ENO	2pg[c] <=> pep[c] + h2o[c]	ECOLC_RS04990	Enolase	Glycolysis/Gluconeogenesis	1	-1000	1000	0
ENTCS	3 23dhba[c] + 3 seramp[c] -> 9 h[c] + 6 amp[c] + enter[c]	ECOLC_RS16475	Enterochelin synthase	Cofactor and Prosthetic Group Biosynthesis	0	0	1000	0
ENTERES	3 h2o[c] + enter[c] -> 3 h[c] + 3 23dhbzs[c]	ECOLC_RS16465	Enterochelin Esterase	Inorganic Ion Transport and Metabolism	0	0	1000	0
ENTERES2	3 h2o[c] + feenter[c] -> fe3[c] + 3 h[c] + 3 23dhbzs[c]	ECOLC_RS16465	Enterochelin Esterase (Fe containing)	Inorganic Ion Transport and Metabolism	0	0	1000	0
ENTERH	enter[c] + h2o[c] -> 23dhbzs3[c]	"	Enterobactin hydrolase	Inorganic Ion Transport and Metabolism	0	0	1000	0
EPMEACPR	h[c] + epmeACP[c] + nadph[c] -> pmeACP[c] + nadp[c]	ECOLC_RS12515	Enoylpimeloyl-[ACP] methyl ester reductase	Cofactor and Prosthetic Group Biosynthesis	0	0	1000	0
ETHAAL	etha[c] -> nh4[c] + acald[c]	ECOLC_RS06645 and ECOLC_RS06640	Ethanolamine ammonia-lyase	Cell Envelope Biosynthesis	0	0	1000	0
ETHAt2pp	h[p] + etha[p] -> h[c] + etha[c]	"	Ethanolamine transport in via proton symport	Transport Inner Membrane	0	0	1000	0
ETHAtex	etha[e] <=> etha[p]	ECOLC_RS17950 or ECOLC_RS14330 or ECOLC_RS12200 or ECOLC_RS07685	Ethanolamine transport via diffusion (extracellular)	Transport Outer Membrane Porin	1	-1000	1000	0
ETHSO3abcpp	atp[c] + h2o[c] + ethso3[p] -> h[c] + adp[c] + pi[c] + ethso3[c]	ECOLC_RS14295 and ECOLC_RS14310 and ECOLC_RS14305	Ethanesulfonate transport via ABC system (periplasm)	Transport Inner Membrane	0	0	1000	0
ETHSO3tex	ethso3[e] <=> ethso3[p]	ECOLC_RS17950 or ECOLC_RS14330 or ECOLC_RS12200 or ECOLC_RS07685	Ethanesulfonate transport via diffusion (extracellular to periplasm)	Transport Outer Membrane Porin	1	-1000	1000	0
ETOHtex	etoh[e] <=> etoh[p]	ECOLC_RS17950 or ECOLC_RS14330 or ECOLC_RS12200 or ECOLC_RS07685	Ethanol transport via diffusion (extracellular to periplasm)	Transport Outer Membrane Porin	1	-1000	1000	0
ETOHtrpp	etoh[p] <=> etoh[c]	s0001	Ethanol reversible transport via diffusion (periplasm)	Transport Inner Membrane	1	-1000	1000	0
EX_12ppd__R_e	12ppd__R[e] ->	"	(R)-Propane-1,2-diol exchange	Extracellular exchange	0	0	1000	0
EX_12ppd__S_e	12ppd__S[e] ->	"	(S)-Propane-1,2-diol exchange	Extracellular exchange	0	0	1000	0
EX_14glucan_e	14glucan[e] ->	"	1,4-alpha-D-glucan exchange	Extracellular exchange	0	0	1000	0
EX_15dap_e	15dap[e] ->	"	1,5-Diaminopentane exchange	Extracellular exchange	0	0	1000	0
EX_23camp_e	23camp[e] ->	"	2,3-Cyclic AMP exchange	Extracellular exchange	0	0	1000	0
EX_23ccmp_e	23ccmp[e] ->	"	2,3-Cyclic CMP exchange	Extracellular exchange	0	0	1000	0
EX_23cgmp_e	23cgmp[e] ->	"	2,3-Cyclic GMP exchange	Extracellular exchange	0	0	1000	0
EX_23cump_e	23cump[e] ->	"	2,3-Cyclic UMP exchange	Extracellular exchange	0	0	1000	0
EX_23dappa_e	23dappa[e] ->	"	2,3-diaminopropionate exchange	Extracellular exchange	0	0	1000	0
EX_26dap__M_e	26dap__M[e] ->	"	Meso-2,6-Diaminoheptanedioate exchange	Extracellular exchange	0	0	1000	0
EX_2ddglcn_e	2ddglcn[e] ->	"	2-Dehydro-3-deoxy-D-gluconate exchange	Extracellular exchange	0	0	1000	0
EX_34dhpac_e	34dhpac[e] ->	"	3,4-Dihydroxyphenylacetaldehyde exchange	Extracellular exchange	0	0	1000	0
EX_3amp_e	3amp[e] ->	"	3-AMP exchange	Extracellular exchange	0	0	1000	0
EX_3cmp_e	3cmp[e] ->	"	3-cmp exchange	Extracellular exchange	0	0	1000	0
EX_3gmp_e	3gmp[e] ->	"	3-GMP exchange	Extracellular exchange	0	0	1000	0
EX_3hcinnm_e	3hcinnm[e] ->	"	3-hydroxycinnamic acid exchange	Extracellular exchange	0	0	1000	0
EX_3hoxpac_e	3hoxpac[e] ->	"	3 hydroxy phenylacetic acid exhcnage	Extracellular exchange	0	0	1000	0
EX_3hpp_e	3hpp[e] ->	"	3-Hydroxypropanoate exchange	Extracellular exchange	0	0	1000	0
EX_3hpppn_e	3hpppn[e] ->	"	3-(3-hydroxy-phenyl)propionate exchange	Extracellular exchange	0	0	1000	0
EX_3ntym_e	3ntym[e] ->	"	3ntyramine Exchange reaction	Extracellular exchange	0	0	1000	0
EX_3ump_e	3ump[e] ->	"	3-UMP exchange	Extracellular exchange	0	0	1000	0
EX_4abut_e	4abut[e] ->	"	4-Aminobutanoate exchange	Extracellular exchange	0	0	1000	0
EX_4hoxpac_e	4hoxpac[e] ->	"	4 hydroxy phenylacetic acid exhcnage	Extracellular exchange	0	0	1000	0
EX_4hoxpacd_e	4hoxpacd[e] ->	"	4-Hydroxyphenylacetaldehyde exchange	Extracellular exchange	0	0	1000	0
EX_5dglcn_e	5dglcn[e] ->	"	5-Dehydro-D-gluconate exchange	Extracellular exchange	0	0	1000	0
EX_5mtr_e	5mtr[e] ->	"	5-Methylthio-D-ribose exchange	Extracellular exchange	0	0	1000	0
EX_6apa_e	6apa[e] ->	"	6 amino penicillanic acid exchange	Extracellular exchange	0	0	1000	0
EX_ac_e	ac[e] ->	"	Acetate exchange	Extracellular exchange	0	0	1000	0
EX_acac_e	acac[e] ->	"	Acetoacetate exchange	Extracellular exchange	0	0	1000	0
EX_acald_e	acald[e] ->	"	Acetaldehyde exchange	Extracellular exchange	0	0	1000	0
EX_acgal_e	acgal[e] ->	"	N-Acetyl-D-galactosamine exchange	Extracellular exchange	0	0	1000	0
EX_acgal1p_e	acgal1p[e] ->	"	N-Acetyl-D-galactosamine 1-phosphate exchange	Extracellular exchange	0	0	1000	0
EX_acgam_e	acgam[e] ->	"	N-Acetyl-D-glucosamine exchange	Extracellular exchange	0	0	1000	0
EX_acgam1p_e	acgam1p[e] ->	"	N-Acetyl-D-glucosamine 1-phosphate exchange	Extracellular exchange	0	0	1000	0
EX_acmana_e	acmana[e] ->	"	N-Acetyl-D-mannosamine exchange	Extracellular exchange	0	0	1000	0
EX_acmum_e	acmum[e] ->	"	N-Acetylmuramate exchange	Extracellular exchange	0	0	1000	0
EX_acnam_e	acnam[e] ->	"	N-Acetylneuraminate exchange	Extracellular exchange	0	0	1000	0
EX_acser_e	acser[e] ->	"	O-Acetyl-L-serine exchange	Extracellular exchange	0	0	1000	0
EX_ade_e	ade[e] ->	"	Adenine exchange	Extracellular exchange	0	0	1000	0
EX_adn_e	adn[e] ->	"	Adenosine exchange	Extracellular exchange	0	0	1000	0
EX_adocbl_e	adocbl[e] ->	"	Adenosylcobalamin exchange	Extracellular exchange	0	0	1000	0
EX_ag_e	ag[e] ->	"	Silver exchange	Extracellular exchange	0	0	1000	0
EX_agm_e	agm[e] ->	"	Agmatine exchange	Extracellular exchange	0	0	1000	0
EX_akg_e	akg[e] ->	"	2-Oxoglutarate exchange	Extracellular exchange	0	0	1000	0
EX_ala__D_e	ala__D[e] ->	"	D-Alanine exchange	Extracellular exchange	0	0	1000	0
EX_ala__L_e	ala__L[e] ->	"	L-Alanine exchange	Extracellular exchange	0	0	1000	0
EX_ala_B_e	ala_B[e] ->	"	Beta-Alanine exchange	Extracellular exchange	0	0	1000	0
EX_alaala_e	alaala[e] ->	"	D-Alanyl-D-alanine exchange	Extracellular exchange	0	0	1000	0
EX_all__D_e	all__D[e] ->	"	D-Allose exchange	Extracellular exchange	0	0	1000	0
EX_alltn_e	alltn[e] ->	"	Allantoin exchange	Extracellular exchange	0	0	1000	0
EX_amp_e	amp[e] ->	"	AMP exchange	Extracellular exchange	0	0	1000	0
EX_anhgm_e	anhgm[e] ->	"	N-Acetyl-D-glucosamine(anhydrous)N-Acetylmuramic acid exchange	Extracellular exchange	0	0	1000	0
EX_arab__D_e	arab__D[e] ->	"	D Arabinose exchange	Extracellular exchange	0	0	1000	0
EX_arab__L_e	arab__L[e] ->	"	L-Arabinose exchange	Extracellular exchange	0	0	1000	0
EX_arbt_e	arbt[e] ->	"	Arbutin exchange	Extracellular exchange	0	0	1000	0
EX_arbtn_e	arbtn[e] ->	"	Aerobactin minus Fe3 exchange	Extracellular exchange	0	0	1000	0
EX_arbtn_fe3_e	arbtn_fe3[e] ->	"	Aerobactin exchange	Extracellular exchange	0	0	1000	0
EX_arg__L_e	arg__L[e] ->	"	L-Arginine exchange	Extracellular exchange	0	0	1000	0
EX_ascb__L_e	ascb__L[e] ->	"	L-Ascorbate exchange	Extracellular exchange	0	0	1000	0
EX_asn__L_e	asn__L[e] ->	"	L-Asparagine exchange	Extracellular exchange	0	0	1000	0
EX_aso3_e	aso3[e] ->	"	Arsenite exchange	Extracellular exchange	0	0	1000	0
EX_asp__L_e	asp__L[e] ->	"	L-Aspartate exchange	Extracellular exchange	0	0	1000	0
EX_btn_e	btn[e] ->	"	Biotin exchange	Extracellular exchange	0	0	1000	0
EX_but_e	but[e] ->	"	Butyrate (n-C4:0) exchange	Extracellular exchange	0	0	1000	0
EX_butso3_e	butso3[e] ->	"	Butanesulfonate exchange	Extracellular exchange	0	0	1000	0
EX_ca2_e	ca2[e] <=>	"	Calcium exchange	Extracellular exchange	1	-1000	1000	0
EX_cbi_e	cbi[e] <=>	"	Cobinamide exchange	Extracellular exchange	1	-1000	1000	0
EX_cbl1_e	cbl1[e] <=>	"	Cob(I)alamin exchange	Extracellular exchange	1	-1000	1000	0
EX_cd2_e	cd2[e] ->	"	Cadmium exchange	Extracellular exchange	0	0	1000	0
EX_cellb_e	cellb[e] ->	"	Cellobiose exchange	Extracellular exchange	0	0	1000	0
EX_cgly_e	cgly[e] ->	"	Cys-Gly exchange	Extracellular exchange	0	0	1000	0
EX_chol_e	chol[e] ->	"	Choline exchange	Extracellular exchange	0	0	1000	0
EX_chtbs_e	chtbs[e] ->	"	Chitobiose exchange	Extracellular exchange	0	0	1000	0
EX_cit_e	cit[e] ->	"	Citrate exchange	Extracellular exchange	0	0	1000	0
EX_cl_e	cl[e] <=>	"	Chloride exchange	Extracellular exchange	1	-1000	1000	0
EX_cm_e	cm[e] ->	"	Chloramphenicol exchange	Extracellular exchange	0	0	1000	0
EX_cmp_e	cmp[e] ->	"	CMP exchange	Extracellular exchange	0	0	1000	0
EX_co2_e	co2[e] <=>	"	CO2 exchange	Extracellular exchange	1	-1000	1000	0
EX_cobalt2_e	cobalt2[e] <=>	"	Co2+ exchange	Extracellular exchange	1	-1000	1000	0
EX_cpgn_e	cpgn[e] ->	"	Coprogen exchange	Extracellular exchange	0	0	1000	0
EX_cpgn_un_e	cpgn_un[e] ->	"	Coprogen unloaded (no Fe(III)) exchange	Extracellular exchange	0	0	1000	0
EX_crn__D_e	crn__D[e] ->	"	D-carnitine exchange	Extracellular exchange	0	0	1000	0
EX_crn_e	crn[e] ->	"	L-Carnitine exchange	Extracellular exchange	0	0	1000	0
EX_csn_e	csn[e] ->	"	Cytosine exchange	Extracellular exchange	0	0	1000	0
EX_cu_e	cu[e] ->	"	Cu+ exchange	Extracellular exchange	0	0	1000	0
EX_cu2_e	cu2[e] <=>	"	Cu2+ exchange	Extracellular exchange	1	-1000	1000	0
EX_cyan_e	cyan[e] ->	"	Hydrogen cyanide exchange	Extracellular exchange	0	0	1000	0
EX_cynt_e	cynt[e] ->	"	Cyanate exchange	Extracellular exchange	0	0	1000	0
EX_cys__D_e	cys__D[e] ->	"	D-Cysteine exchange	Extracellular exchange	0	0	1000	0
EX_cys__L_e	cys__L[e] ->	"	L-Cysteine exchange	Extracellular exchange	0	0	1000	0
EX_cytd_e	cytd[e] ->	"	Cytidine exchange	Extracellular exchange	0	0	1000	0
EX_dad_2_e	dad_2[e] ->	"	Deoxyadenosine exchange	Extracellular exchange	0	0	1000	0
EX_damp_e	damp[e] ->	"	DAMP exchange	Extracellular exchange	0	0	1000	0
EX_dca_e	dca[e] ->	"	Decanoate (n-C10:0) exchange	Extracellular exchange	0	0	1000	0
EX_dcmp_e	dcmp[e] ->	"	DCMP exchange	Extracellular exchange	0	0	1000	0
EX_dcyt_e	dcyt[e] ->	"	Deoxycytidine exchange	Extracellular exchange	0	0	1000	0
EX_ddca_e	ddca[e] ->	"	Dodecanoate (n-C12:0) exchange	Extracellular exchange	0	0	1000	0
EX_dgmp_e	dgmp[e] ->	"	DGMP exchange	Extracellular exchange	0	0	1000	0
EX_dgsn_e	dgsn[e] ->	"	Deoxyguanosine exchange	Extracellular exchange	0	0	1000	0
EX_dha_e	dha[e] ->	"	Dihydroxyacetone exchange	Extracellular exchange	0	0	1000	0
EX_dimp_e	dimp[e] ->	"	DIMP exchange	Extracellular exchange	0	0	1000	0
EX_din_e	din[e] ->	"	Deoxyinosine exchange	Extracellular exchange	0	0	1000	0
EX_dms_e	dms[e] ->	"	Dimethyl sulfide exchange	Extracellular exchange	0	0	1000	0
EX_dmso_e	dmso[e] ->	"	Dimethyl sulfoxide exchange	Extracellular exchange	0	0	1000	0
EX_dopa_e	dopa[e] ->	"	Dopamine exchange	Extracellular exchange	0	0	1000	0
EX_doxrbcn_e	doxrbcn[e] ->	"	Doxorubicin exchange	Extracellular exchange	0	0	1000	0
EX_dtmp_e	dtmp[e] ->	"	DTMP exchange	Extracellular exchange	0	0	1000	0
EX_dump_e	dump[e] ->	"	DUMP exchange	Extracellular exchange	0	0	1000	0
EX_duri_e	duri[e] ->	"	Deoxyuridine exchange	Extracellular exchange	0	0	1000	0
EX_eca4colipa_e	eca4colipa[e] ->	"	(enterobacterial common antigen)x4 core oligosaccharide lipid A exchange	Extracellular exchange	0	0	1000	0
EX_enlipa_e	enlipa[e] ->	"	Phosphoethanolamine KDO(2)-lipid (A) exchange	Extracellular exchange	0	0	1000	0
EX_enter_e	enter[e] ->	"	Enterochelin exchange	Extracellular exchange	0	0	1000	0
EX_etha_e	etha[e] ->	"	Ethanolamine exchange	Extracellular exchange	0	0	1000	0
EX_ethso3_e	ethso3[e] ->	"	Ethanesulfonate exchange	Extracellular exchange	0	0	1000	0
EX_etoh_e	etoh[e] ->	"	Ethanol exchange	Extracellular exchange	0	0	1000	0
EX_f6p_e	f6p[e] ->	"	D-fructose 6-phosphate exchange	Extracellular exchange	0	0	1000	0
EX_fald_e	fald[e] ->	"	Formaldehyde exchange	Extracellular exchange	0	0	1000	0
EX_fe2_e	fe2[e] <=>	"	Fe2+ exchange	Extracellular exchange	1	-1000	1000	0
EX_fe3_e	fe3[e] <=>	"	Fe3+ exchange	Extracellular exchange	1	-1000	1000	0
EX_fe3dcit_e	fe3dcit[e] ->	"	Fe(III)dicitrate exchange	Extracellular exchange	0	0	1000	0
EX_fe3dhbzs_e	fe3dhbzs[e] ->	"	Ferric 2,3-dihydroxybenzoylserine exchange	Extracellular exchange	0	0	1000	0
EX_fe3hox_e	fe3hox[e] ->	"	Fe(III)hydroxamate exchange	Extracellular exchange	0	0	1000	0
EX_fe3hox_un_e	fe3hox_un[e] ->	"	Fe(III)hydoxamate, unloaded exchange	Extracellular exchange	0	0	1000	0
EX_fecrm_e	fecrm[e] ->	"	Ferrichrome exchange	Extracellular exchange	0	0	1000	0
EX_fecrm_un_e	fecrm_un[e] ->	"	Ferrichrome minus Fe(III) exchange	Extracellular exchange	0	0	1000	0
EX_feenter_e	feenter[e] ->	"	Fe-enterobactin exchange	Extracellular exchange	0	0	1000	0
EX_feoxam_e	feoxam[e] ->	"	Ferroxamine exchange	Extracellular exchange	0	0	1000	0
EX_feoxam_un_e	feoxam_un[e] ->	"	Ferroxamine minus Fe(3) exchange	Extracellular exchange	0	0	1000	0
EX_for_e	for[e] ->	"	Formate exchange	Extracellular exchange	0	0	1000	0
EX_fru_e	fru[e] ->	"	D-Fructose exchange	Extracellular exchange	0	0	1000	0
EX_frulys_e	frulys[e] ->	"	Fructoselysine exchange	Extracellular exchange	0	0	1000	0
EX_fruur_e	fruur[e] ->	"	D-Fructuronate exchange	Extracellular exchange	0	0	1000	0
EX_fuc__L_e	fuc__L[e] ->	"	L-Fucose exchange	Extracellular exchange	0	0	1000	0
EX_fum_e	fum[e] ->	"	Fumarate exchange	Extracellular exchange	0	0	1000	0
EX_fusa_e	fusa[e] ->	"	Fusidic acid exchange	Extracellular exchange	0	0	1000	0
EX_g1p_e	g1p[e] ->	"	D-Glucose 1-phosphate exchange	Extracellular exchange	0	0	1000	0
EX_g3pc_e	g3pc[e] ->	"	Sn-Glycero-3-phosphocholine exchange	Extracellular exchange	0	0	1000	0
EX_g3pe_e	g3pe[e] ->	"	Sn-Glycero-3-phosphoethanolamine exchange	Extracellular exchange	0	0	1000	0
EX_g3pg_e	g3pg[e] ->	"	Glycerophosphoglycerol exchange	Extracellular exchange	0	0	1000	0
EX_g3pi_e	g3pi[e] ->	"	Sn-Glycero-3-phospho-1-inositol exchange	Extracellular exchange	0	0	1000	0
EX_g3ps_e	g3ps[e] ->	"	Glycerophosphoserine exchange	Extracellular exchange	0	0	1000	0
EX_g6p_e	g6p[e] ->	"	D-Glucose 6-phosphate exchange	Extracellular exchange	0	0	1000	0
EX_gal_bD_e	gal_bD[e] ->	"	Beta D-Galactose exchange	Extracellular exchange	0	0	1000	0
EX_gal_e	gal[e] ->	"	D-Galactose exchange	Extracellular exchange	0	0	1000	0
EX_gal1p_e	gal1p[e] ->	"	Alpha-D-Galactose 1-phosphate exchange	Extracellular exchange	0	0	1000	0
EX_galam_e	galam[e] ->	"	D Galactosamine exchange	Extracellular exchange	0	0	1000	0
EX_galct__D_e	galct__D[e] ->	"	D-Galactarate exchange	Extracellular exchange	0	0	1000	0
EX_galctn__D_e	galctn__D[e] ->	"	D-Galactonate exchange	Extracellular exchange	0	0	1000	0
EX_galctn__L_e	galctn__L[e] ->	"	L-Galactonate exchange	Extracellular exchange	0	0	1000	0
EX_galt_e	galt[e] ->	"	Galactitol exchange	Extracellular exchange	0	0	1000	0
EX_galur_e	galur[e] ->	"	D-Galacturonate exchange	Extracellular exchange	0	0	1000	0
EX_gam_e	gam[e] ->	"	D-Glucosamine exchange	Extracellular exchange	0	0	1000	0
EX_gam6p_e	gam6p[e] ->	"	D-Glucosamine 6-phosphate exchange	Extracellular exchange	0	0	1000	0
EX_gbbtn_e	gbbtn[e] ->	"	Gamma-butyrobetaine exchange	Extracellular exchange	0	0	1000	0
EX_gdp_e	gdp[e] ->	"	GDP exchange	Extracellular exchange	0	0	1000	0
EX_glc__D_e	glc__D[e] <=>	"	D-Glucose exchange	Extracellular exchange	0	0	1000	0
EX_glcn_e	glcn[e] ->	"	D-Gluconate exchange	Extracellular exchange	0	0	1000	0
EX_glcr_e	glcr[e] ->	"	D-Glucarate exchange	Extracellular exchange	0	0	1000	0
EX_glcur_e	glcur[e] ->	"	D-Glucuronate exchange	Extracellular exchange	0	0	1000	0
EX_glcur1p_e	glcur1p[e] ->	"	D-Glucuronate 1-phosphate exchange	Extracellular exchange	0	0	1000	0
EX_gln__L_e	gln__L[e] ->	"	L-Glutamine exchange	Extracellular exchange	0	0	1000	0
EX_glu__L_e	glu__L[e] ->	"	L-Glutamate exchange	Extracellular exchange	0	0	1000	0
EX_gly_e	gly[e] ->	"	Glycine exchange	Extracellular exchange	0	0	1000	0
EX_glyald_e	glyald[e] ->	"	D-Glyceraldehyde exchange	Extracellular exchange	0	0	1000	0
EX_glyb_e	glyb[e] ->	"	Glycine betaine exchange	Extracellular exchange	0	0	1000	0
EX_glyc__R_e	glyc__R[e] ->	"	(R)-Glycerate exchange	Extracellular exchange	0	0	1000	0
EX_glyc_e	glyc[e] <=>	"	Glycerol exchange	Extracellular exchange	1	-13.3	1000	0
EX_glyc2p_e	glyc2p[e] ->	"	Glycerol 2-phosphate exchange	Extracellular exchange	0	0	1000	0
EX_glyc3p_e	glyc3p[e] ->	"	Glycerol 3-phosphate exchange	Extracellular exchange	0	0	1000	0
EX_glyclt_e	glyclt[e] ->	"	Glycolate exchange	Extracellular exchange	0	0	1000	0
EX_gmp_e	gmp[e] ->	"	GMP exchange	Extracellular exchange	0	0	1000	0
EX_gsn_e	gsn[e] ->	"	Guanosine exchange	Extracellular exchange	0	0	1000	0
EX_gthox_e	gthox[e] ->	"	Oxidized glutathione exchange	Extracellular exchange	0	0	1000	0
EX_gthrd_e	gthrd[e] ->	"	Reduced glutathione exchange	Extracellular exchange	0	0	1000	0
EX_gtp_e	gtp[e] ->	"	GTP exchange	Extracellular exchange	0	0	1000	0
EX_gua_e	gua[e] ->	"	Guanine exchange	Extracellular exchange	0	0	1000	0
EX_h_e	h[e] <=>	"	H+ exchange	Extracellular exchange	1	-1000	1000	0
EX_h2_e	h2[e] ->	"	H2 exchange	Extracellular exchange	0	0	1000	0
EX_h2o_e	h2o[e] <=>	"	H2O exchange	Extracellular exchange	1	-1000	1000	0
EX_h2o2_e	h2o2[e] ->	"	Hydrogen peroxide exchange	Extracellular exchange	0	0	1000	0
EX_h2s_e	h2s[e] ->	"	Hydrogen sulfide exchange	Extracellular exchange	0	0	1000	0
EX_hacolipa_e	hacolipa[e] ->	"	Hepta-acylated core oligosaccharide lipid A (E. coli) exchange	Extracellular exchange	0	0	1000	0
EX_halipa_e	halipa[e] ->	"	Hepta-acylated KDO(2)-lipid (A) exchange	Extracellular exchange	0	0	1000	0
EX_hdca_e	hdca[e] ->	"	Hexadecanoate (n-C16:0) exchange	Extracellular exchange	0	0	1000	0
EX_hdcea_e	hdcea[e] ->	"	Hexadecenoate (n-C16:1) exchange	Extracellular exchange	0	0	1000	0
EX_hg2_e	hg2[e] ->	"	Hg2+ exchange	Extracellular exchange	0	0	1000	0
EX_his__L_e	his__L[e] ->	"	L-Histidine exchange	Extracellular exchange	0	0	1000	0
EX_hom__L_e	hom__L[e] ->	"	L-Homoserine exchange	Extracellular exchange	0	0	1000	0
EX_hxa_e	hxa[e] ->	"	Hexanoate (n-C6:0) exchange	Extracellular exchange	0	0	1000	0
EX_hxan_e	hxan[e] ->	"	Hypoxanthine exchange	Extracellular exchange	0	0	1000	0
EX_idon__L_e	idon__L[e] ->	"	L-Idonate exchange	Extracellular exchange	0	0	1000	0
EX_ile__L_e	ile__L[e] ->	"	L-Isoleucine exchange	Extracellular exchange	0	0	1000	0
EX_imp_e	imp[e] ->	"	IMP exchange	Extracellular exchange	0	0	1000	0
EX_indole_e	indole[e] ->	"	Indole exchange	Extracellular exchange	0	0	1000	0
EX_inost_e	inost[e] ->	"	Myo-Inositol exchange	Extracellular exchange	0	0	1000	0
EX_ins_e	ins[e] ->	"	Inosine exchange	Extracellular exchange	0	0	1000	0
EX_isetac_e	isetac[e] ->	"	Isethionic acid exchange	Extracellular exchange	0	0	1000	0
EX_k_e	k[e] <=>	"	K+ exchange	Extracellular exchange	1	-1000	1000	0
EX_lac__D_e	lac__D[e] ->	"	D-lactate exchange	Extracellular exchange	0	0	1000	0
EX_lac__L_e	lac__L[e] ->	"	L-Lactate exchange	Extracellular exchange	0	0	1000	0
EX_LalaDglu_e	LalaDglu[e] ->	"	L-alanine-D-glutamate exchange	Extracellular exchange	0	0	1000	0
EX_LalaDgluMdap_e	LalaDgluMdap[e] ->	"	L-alanine-D-glutamate-meso-2,6-diaminoheptanedioate exchange	Extracellular exchange	0	0	1000	0
EX_LalaDgluMdapDala_e	LalaDgluMdapDala[e] ->	"	L-alanine-D-glutamate-meso-2,6-diaminoheptanedioate-D-alanine exchange	Extracellular exchange	0	0	1000	0
EX_LalaLglu_e	LalaLglu[e] ->	"	L-alanine-L-glutamate exchange	Extracellular exchange	0	0	1000	0
EX_lcts_e	lcts[e] ->	"	Lactose exchange	Extracellular exchange	0	0	1000	0
EX_leu__L_e	leu__L[e] ->	"	L-Leucine exchange	Extracellular exchange	0	0	1000	0
EX_lipoate_e	lipoate[e] ->	"	Lipoate exchange	Extracellular exchange	0	0	1000	0
EX_lys__L_e	lys__L[e] ->	"	L-Lysine exchange	Extracellular exchange	0	0	1000	0
EX_lyx__L_e	lyx__L[e] ->	"	L-Lyxose exchange	Extracellular exchange	0	0	1000	0
EX_mal__D_e	mal__D[e] ->	"	D-Malate exchange	Extracellular exchange	0	0	1000	0
EX_mal__L_e	mal__L[e] ->	"	L-Malate exchange	Extracellular exchange	0	0	1000	0
EX_malt_e	malt[e] ->	"	Maltose exchange	Extracellular exchange	0	0	1000	0
EX_malthx_e	malthx[e] ->	"	Maltohexaose exchange	Extracellular exchange	0	0	1000	0
EX_maltpt_e	maltpt[e] ->	"	Maltopentaose exchange	Extracellular exchange	0	0	1000	0
EX_malttr_e	malttr[e] ->	"	Maltotriose exchange	Extracellular exchange	0	0	1000	0
EX_maltttr_e	maltttr[e] ->	"	Maltotetraose exchange	Extracellular exchange	0	0	1000	0
EX_man_e	man[e] ->	"	D-Mannose exchange	Extracellular exchange	0	0	1000	0
EX_man6p_e	man6p[e] ->	"	D-Mannose 6-phosphate exchange	Extracellular exchange	0	0	1000	0
EX_manglyc_e	manglyc[e] ->	"	2(alpha-D-Mannosyl)-D-glycerate exchange	Extracellular exchange	0	0	1000	0
EX_melib_e	melib[e] ->	"	Melibiose exchange	Extracellular exchange	0	0	1000	0
EX_meoh_e	meoh[e] ->	"	Methanol exchange	Extracellular exchange	0	0	1000	0
EX_met__D_e	met__D[e] ->	"	D-Methionine exchange	Extracellular exchange	0	0	1000	0
EX_met__L_e	met__L[e] ->	"	L-Methionine exchange	Extracellular exchange	0	0	1000	0
EX_metsox_R__L_e	metsox_R__L[e] ->	"	L-methionine-R-sulfoxide exchange	Extracellular exchange	0	0	1000	0
EX_metsox_S__L_e	metsox_S__L[e] ->	"	L-Methionine S-oxide exchange	Extracellular exchange	0	0	1000	0
EX_mg2_e	mg2[e] <=>	"	Mg exchange	Extracellular exchange	1	-1000	1000	0
EX_mincyc_e	mincyc[e] ->	"	Minocycline exchange	Extracellular exchange	0	0	1000	0
EX_minohp_e	minohp[e] ->	"	Myo-Inositol hexakisphosphate exchange	Extracellular exchange	0	0	1000	0
EX_mmet_e	mmet[e] ->	"	S-Methyl-L-methionine exchange	Extracellular exchange	0	0	1000	0
EX_mn2_e	mn2[e] <=>	"	Mn2+ exchange	Extracellular exchange	1	-1000	1000	0
EX_mnl_e	mnl[e] ->	"	D-Mannitol exchange	Extracellular exchange	0	0	1000	0
EX_mobd_e	mobd[e] <=>	"	Molybdate exchange	Extracellular exchange	1	-1000	1000	0
EX_mso3_e	mso3[e] ->	"	Methanesulfonate exchange	Extracellular exchange	0	0	1000	0
EX_n2o_e	n2o[e] ->	"	Nitrous oxide exchange	Extracellular exchange	0	0	1000	0
EX_na1_e	na1[e] <=>	"	Sodium exchange	Extracellular exchange	1	-1000	1000	0
EX_nac_e	nac[e] ->	"	Nicotinate exchange	Extracellular exchange	0	0	1000	0
EX_nh4_e	nh4[e] <=>	"	Ammonia exchange	Extracellular exchange	1	-1000	1000	0
EX_ni2_e	ni2[e] <=>	"	Ni2+ exchange	Extracellular exchange	1	-1000	1000	0
EX_nmn_e	nmn[e] ->	"	NMN exchange	Extracellular exchange	0	0	1000	0
EX_no_e	no[e] ->	"	Nitric oxide exchange	Extracellular exchange	0	0	1000	0
EX_no2_e	no2[e] ->	"	Nitrite exchange	Extracellular exchange	0	0	1000	0
EX_no3_e	no3[e] ->	"	Nitrate exchange	Extracellular exchange	0	0	1000	0
EX_novbcn_e	novbcn[e] ->	"	Novobiocin exchange	Extracellular exchange	0	0	1000	0
EX_o2_e	o2[e] <=>	"	O2 exchange	Extracellular exchange	1	-1000	1000	0
EX_o2s_e	o2s[e] ->	"	Superoxide anion exchange	Extracellular exchange	0	0	1000	0
EX_o6a4colipa_e	o6a4colipa[e] ->	"	O6 antigen x4 core oligosaccharide lipid A exchange	Extracellular exchange	0	0	1000	0
EX_ocdca_e	ocdca[e] ->	"	Octadecanoate (n-C18:0) exchange	Extracellular exchange	0	0	1000	0
EX_ocdcea_e	ocdcea[e] ->	"	Octadecenoate (n-C18:1) exchange	Extracellular exchange	0	0	1000	0
EX_octa_e	octa[e] ->	"	Octanoate (n-C8:0) exchange	Extracellular exchange	0	0	1000	0
EX_orn_e	orn[e] ->	"	Ornithine exchange	Extracellular exchange	0	0	1000	0
EX_orot_e	orot[e] ->	"	Orotate exchange	Extracellular exchange	0	0	1000	0
EX_pacald_e	pacald[e] ->	"	Phenylacetaldehyde exchange	Extracellular exchange	0	0	1000	0
EX_peamn_e	peamn[e] ->	"	Phenethylamine exchange	Extracellular exchange	0	0	1000	0
EX_peng_e	peng[e] ->	"	Penicillin G exchange	Extracellular exchange	0	0	1000	0
EX_phe__L_e	phe__L[e] ->	"	L-Phenylalanine exchange	Extracellular exchange	0	0	1000	0
EX_pheme_e	pheme[e] ->	"	Protoheme exchange	Extracellular exchange	0	0	1000	0
EX_pi_e	pi[e] <=>	"	Phosphate exchange	Extracellular exchange	1	-1000	1000	0
EX_pnto__R_e	pnto__R[e] ->	"	(R)-Pantothenate exchange	Extracellular exchange	0	0	1000	0
EX_ppa_e	ppa[e] ->	"	Propionate exchange	Extracellular exchange	0	0	1000	0
EX_ppal_e	ppal[e] ->	"	Propanal exchange	Extracellular exchange	0	0	1000	0
EX_pppn_e	pppn[e] ->	"	Phenylpropanoate exchange	Extracellular exchange	0	0	1000	0
EX_ppt_e	ppt[e] ->	"	Phosphonate exchange	Extracellular exchange	0	0	1000	0
EX_pro__L_e	pro__L[e] ->	"	L-Proline exchange	Extracellular exchange	0	0	1000	0
EX_progly_e	progly[e] ->	"	L-Prolinylglycine exchange	Extracellular exchange	0	0	1000	0
EX_psclys_e	psclys[e] ->	"	Psicoselysine exchange	Extracellular exchange	0	0	1000	0
EX_pser__L_e	pser__L[e] ->	"	O-Phospho-L-serine exchange	Extracellular exchange	0	0	1000	0
EX_ptrc_e	ptrc[e] ->	"	Putrescine exchange	Extracellular exchange	0	0	1000	0
EX_pydam_e	pydam[e] ->	"	Pyridoxamine exchange	Extracellular exchange	0	0	1000	0
EX_pydx_e	pydx[e] ->	"	Pyridoxal exchange	Extracellular exchange	0	0	1000	0
EX_pydxn_e	pydxn[e] ->	"	Pyridoxine exchange	Extracellular exchange	0	0	1000	0
EX_pyr_e	pyr[e] ->	"	Pyruvate exchange	Extracellular exchange	0	0	1000	0
EX_quin_e	quin[e] ->	"	Quinate exchange	Extracellular exchange	0	0	1000	0
EX_r5p_e	r5p[e] ->	"	Alpha-D-Ribose 5-phosphate exchange	Extracellular exchange	0	0	1000	0
EX_raffin_e	raffin[e] ->	"	Raffinose exchange	Extracellular exchange	0	0	1000	0
EX_rfamp_e	rfamp[e] ->	"	Rifampin exchange	Extracellular exchange	0	0	1000	0
EX_rib__D_e	rib__D[e] ->	"	D-Ribose exchange	Extracellular exchange	0	0	1000	0
EX_rmn_e	rmn[e] ->	"	L-Rhamnose exchange	Extracellular exchange	0	0	1000	0
EX_salcn_e	salcn[e] ->	"	Salicin exchange	Extracellular exchange	0	0	1000	0
EX_sbt__D_e	sbt__D[e] ->	"	D-Sorbitol exchange	Extracellular exchange	0	0	1000	0
EX_sel_e	sel[e] <=>	"	Selenate exchange	Extracellular exchange	1	-1000	1000	0
EX_ser__D_e	ser__D[e] ->	"	D-Serine exchange	Extracellular exchange	0	0	1000	0
EX_ser__L_e	ser__L[e] ->	"	L-Serine exchange	Extracellular exchange	0	0	1000	0
EX_skm_e	skm[e] ->	"	Shikimate exchange	Extracellular exchange	0	0	1000	0
EX_slnt_e	slnt[e] <=>	"	Selenite exchange	Extracellular exchange	1	-1000	1000	0
EX_so2_e	so2[e] ->	"	Sulfur dioxide exchange	Extracellular exchange	0	0	1000	0
EX_so3_e	so3[e] ->	"	Sulfite exchange	Extracellular exchange	0	0	1000	0
EX_so4_e	so4[e] <=>	"	Sulfate exchange	Extracellular exchange	1	-1000	1000	0
EX_spmd_e	spmd[e] ->	"	Spermidine exchange	Extracellular exchange	0	0	1000	0
EX_succ_e	succ[e] ->	"	Succinate exchange	Extracellular exchange	0	0	1000	0
EX_sucr_e	sucr[e] ->	"	Sucrose exchange	Extracellular exchange	0	0	1000	0
EX_sulfac_e	sulfac[e] ->	"	Sulfoacetate exchange	Extracellular exchange	0	0	1000	0
EX_tartr__D_e	tartr__D[e] ->	"	D-tartrate exchange	Extracellular exchange	0	0	1000	0
EX_tartr__L_e	tartr__L[e] ->	"	L-tartrate exchange	Extracellular exchange	0	0	1000	0
EX_taur_e	taur[e] ->	"	Taurine exchange	Extracellular exchange	0	0	1000	0
EX_tcynt_e	tcynt[e] ->	"	Thiocyanate exchange	Extracellular exchange	0	0	1000	0
EX_thm_e	thm[e] ->	"	Thiamin exchange	Extracellular exchange	0	0	1000	0
EX_thr__L_e	thr__L[e] ->	"	L-Threonine exchange	Extracellular exchange	0	0	1000	0
EX_thrp_e	thrp[e] ->	"	L-Threonine O-3-phosphate exchange	Extracellular exchange	0	0	1000	0
EX_thym_e	thym[e] ->	"	Thymine exchange	Extracellular exchange	0	0	1000	0
EX_thymd_e	thymd[e] ->	"	Thymidine exchange	Extracellular exchange	0	0	1000	0
EX_tma_e	tma[e] ->	"	Trimethylamine exchange	Extracellular exchange	0	0	1000	0
EX_tmao_e	tmao[e] ->	"	Trimethylamine N-oxide exchange	Extracellular exchange	0	0	1000	0
EX_tre_e	tre[e] ->	"	Trehalose exchange	Extracellular exchange	0	0	1000	0
EX_trp__L_e	trp__L[e] ->	"	L-Tryptophan exchange	Extracellular exchange	0	0	1000	0
EX_tsul_e	tsul[e] ->	"	Thiosulfate exchange	Extracellular exchange	0	0	1000	0
EX_ttdca_e	ttdca[e] ->	"	Tetradecanoate (n-C14:0) exchange	Extracellular exchange	0	0	1000	0
EX_ttdcea_e	ttdcea[e] ->	"	Tetradecenoate (n-C14:1) exchange	Extracellular exchange	0	0	1000	0
EX_ttrcyc_e	ttrcyc[e] ->	"	Tetracycline exchange	Extracellular exchange	0	0	1000	0
EX_tungs_e	tungs[e] <=>	"	Tungstate exchange	Extracellular exchange	1	-1000	1000	0
EX_tym_e	tym[e] ->	"	Tyramine exchange	Extracellular exchange	0	0	1000	0
EX_tyr__L_e	tyr__L[e] ->	"	L-Tyrosine exchange	Extracellular exchange	0	0	1000	0
EX_tyrp_e	tyrp[e] ->	"	Phosphotyrosine exchange	Extracellular exchange	0	0	1000	0
EX_uacgam_e	uacgam[e] ->	"	UDP-N-acetyl-D-glucosamine exchange	Extracellular exchange	0	0	1000	0
EX_udpacgal_e	udpacgal[e] ->	"	UDP-N-acetyl-D-galactosamine exchange	Extracellular exchange	0	0	1000	0
EX_udpg_e	udpg[e] ->	"	UDPglucose exchange	Extracellular exchange	0	0	1000	0
EX_udpgal_e	udpgal[e] ->	"	UDPgalactose exchange	Extracellular exchange	0	0	1000	0
EX_udpglcur_e	udpglcur[e] ->	"	UDP-D-glucuronate exchange	Extracellular exchange	0	0	1000	0
EX_ump_e	ump[e] ->	"	UMP exchange	Extracellular exchange	0	0	1000	0
EX_ura_e	ura[e] ->	"	Uracil exchange	Extracellular exchange	0	0	1000	0
EX_urea_e	urea[e] ->	"	Urea exchange	Extracellular exchange	0	0	1000	0
EX_uri_e	uri[e] ->	"	Uridine exchange	Extracellular exchange	0	0	1000	0
EX_val__L_e	val__L[e] ->	"	L-Valine exchange	Extracellular exchange	0	0	1000	0
EX_xan_e	xan[e] ->	"	Xanthine exchange	Extracellular exchange	0	0	1000	0
EX_xmp_e	xmp[e] ->	"	Xanthosine 5-phosphate exchange	Extracellular exchange	0	0	1000	0
EX_xtsn_e	xtsn[e] ->	"	Xanthosine exchange	Extracellular exchange	0	0	1000	0
EX_xyl__D_e	xyl__D[e] ->	"	D-Xylose exchange	Extracellular exchange	0	0	1000	0
EX_xylu__L_e	xylu__L[e] ->	"	L-Xylulose exchange	Extracellular exchange	0	0	1000	0
EX_zn2_e	zn2[e] <=>	"	Zinc exchange	Extracellular exchange	1	-1000	1000	0
F1PP	f1p[c] + h2o[c] -> fru[c] + pi[c]	"	D-fructose 1-phosphate phosphatase	Alternate Carbon Metabolism	0	0	1000	0
F6PA	f6p[c] <=> g3p[c] + dha[c]	ECOLC_RS15120 or ECOLC_RS21915	Fructose 6-phosphate aldolase	Glycolysis/Gluconeogenesis	1	-1000	1000	0
F6PP	h2o[c] + f6p[c] -> fru[c] + pi[c]	ECOLC_RS15135	D-fructose 6-phosphate phosphatase	Alternate Carbon Metabolism	0	0	1000	0
F6Pt6_2pp	2 pi[c] + f6p[p] -> f6p[c] + 2 pi[p]	ECOLC_RS00185	Fructose-6-phosphate transport via phosphate antiport (periplasm)	Transport Inner Membrane	0	0	1000	0
F6Ptex	f6p[e] <=> f6p[p]	ECOLC_RS17950 or ECOLC_RS14330 or ECOLC_RS12200 or ECOLC_RS07685	Fructose 6-phosphate transport via diffusion (extracellular to periplasm)	Transport Outer Membrane Porin	1	-1000	1000	0
FA100ACPHi	h2o[c] + dcaACP[c] -> dca[c] + h[c] + ACP[c]	ECOLC_RS17350	Fatty-acyl-ACP hydrolase	Cell Envelope Biosynthesis	0	0	1000	0
FA120ACPHi	h2o[c] + ddcaACP[c] -> h[c] + ddca[c] + ACP[c]	ECOLC_RS17350	Fatty-acyl-ACP hydrolase	Cell Envelope Biosynthesis	0	0	1000	0
FA140ACPHi	h2o[c] + myrsACP[c] -> h[c] + ttdca[c] + ACP[c]	ECOLC_RS17350	Fatty-acyl-ACP hydrolase	Cell Envelope Biosynthesis	0	0	1000	0
FA141ACPHi	tdeACP[c] + h2o[c] -> h[c] + ttdcea[c] + ACP[c]	ECOLC_RS17350	Fatty-acyl-ACP hydrolase	Cell Envelope Biosynthesis	0	0	1000	0
FA160ACPHi	h2o[c] + palmACP[c] -> h[c] + hdca[c] + ACP[c]	ECOLC_RS17350	Fatty-acyl-ACP hydrolase	Cell Envelope Biosynthesis	0	0	1000	0
FA161ACPHi	hdeACP[c] + h2o[c] -> h[c] + hdcea[c] + ACP[c]	ECOLC_RS17350	Fatty-acyl-ACP hydrolase	Cell Envelope Biosynthesis	0	0	1000	0
FA80ACPHi	ocACP[c] + h2o[c] -> h[c] + octa[c] + ACP[c]	ECOLC_RS17350	Fatty-acyl-ACP hydrolase	Cell Envelope Biosynthesis	0	0	1000	0
FACOAE100	h2o[c] + dcacoa[c] -> dca[c] + h[c] + coa[c]	ECOLC_RS17005	Fatty-acid-CoA thioesterase (decanoate)	Cell Envelope Biosynthesis	0	0	1000	0
FACOAE120	ddcacoa[c] + h2o[c] -> h[c] + ddca[c] + coa[c]	ECOLC_RS17005	Fatty-acid-CoA thioesterase (dodecanoate)	Cell Envelope Biosynthesis	0	0	1000	0
FACOAE140	tdcoa[c] + h2o[c] -> h[c] + ttdca[c] + coa[c]	ECOLC_RS17005	Fatty-acid-CoA thioesterase (tetradecanoate)	Cell Envelope Biosynthesis	0	0	1000	0
FACOAE141	tdecoa[c] + h2o[c] -> h[c] + ttdcea[c] + coa[c]	ECOLC_RS17005	Fatty-acid-CoA thioesterase (tetradecenoate)	Cell Envelope Biosynthesis	0	0	1000	0
FACOAE160	h2o[c] + pmtcoa[c] -> h[c] + hdca[c] + coa[c]	ECOLC_RS17005	Fatty-acid-CoA thioesterase (hexadecanoate)	Cell Envelope Biosynthesis	0	0	1000	0
FACOAE161	hdcoa[c] + h2o[c] -> h[c] + hdcea[c] + coa[c]	ECOLC_RS17005	Fatty-acid-CoA thioesterase (hexadecenoate)	Cell Envelope Biosynthesis	0	0	1000	0
FACOAE180	h2o[c] + stcoa[c] -> h[c] + ocdca[c] + coa[c]	ECOLC_RS17005	Fatty-acid-CoA thioesterase (octadecanoate)	Cell Envelope Biosynthesis	0	0	1000	0
FACOAE181	odecoa[c] + h2o[c] -> h[c] + ocdcea[c] + coa[c]	ECOLC_RS17005	Fatty-acid-CoA thioesterase (octadecenoate)	Cell Envelope Biosynthesis	0	0	1000	0
FACOAE60	h2o[c] + hxcoa[c] -> h[c] + hxa[c] + coa[c]	ECOLC_RS17005	Fatty-acid-CoA thioesterase (hexanoate)	Cell Envelope Biosynthesis	0	0	1000	0
FACOAE80	occoa[c] + h2o[c] -> h[c] + octa[c] + coa[c]	ECOLC_RS17005	Fatty-acid-CoA thioesterase (octanoate)	Cell Envelope Biosynthesis	0	0	1000	0
FACOAL100t2pp	h[p] + atp[c] + coa[c] + dca[p] -> h[c] + ppi[c] + dcacoa[c] + amp[c]	ECOLC_RS09830 or ECOLC_RS10375	Fatty-acid-CoA ligase (decanoate transport via vectoral Co-A coupling)	Cell Envelope Biosynthesis	0	0	1000	0
FACOAL120t2pp	h[p] + atp[c] + ddca[p] + coa[c] -> h[c] + ddcacoa[c] + ppi[c] + amp[c]	ECOLC_RS10375 or ECOLC_RS09830	Fatty-acid-CoA ligase (dodecanoate transport via vectoral Co-A coupling)	Cell Envelope Biosynthesis	0	0	1000	0
FACOAL140t2pp	h[p] + atp[c] + ttdca[p] + coa[c] -> h[c] + tdcoa[c] + ppi[c] + amp[c]	ECOLC_RS10375 or ECOLC_RS09830	Fatty-acid-CoA ligase (tetradecanoate transport via vectoral Co-A coupling)	Cell Envelope Biosynthesis	0	0	1000	0
FACOAL141t2pp	h[p] + atp[c] + ttdcea[p] + coa[c] -> h[c] + tdecoa[c] + ppi[c] + amp[c]	ECOLC_RS10375 or ECOLC_RS09830	Fatty-acid-CoA ligase (tetradecenoate transport via vectoral Co-A coupling)	Cell Envelope Biosynthesis	0	0	1000	0
FACOAL160t2pp	hdca[p] + h[p] + atp[c] + coa[c] -> h[c] + ppi[c] + pmtcoa[c] + amp[c]	ECOLC_RS10375 or ECOLC_RS09830	Fatty-acid-CoA ligase (hexadecanoate transport via vectoral Co-A coupling)	Cell Envelope Biosynthesis	0	0	1000	0
FACOAL161t2pp	h[p] + atp[c] + coa[c] + hdcea[p] -> h[c] + hdcoa[c] + ppi[c] + amp[c]	ECOLC_RS09830 or ECOLC_RS10375	Fatty-acid-CoA ligase (hexadecenoate transport via vectoral Co-A coupling)	Cell Envelope Biosynthesis	0	0	1000	0
FACOAL180t2pp	h[p] + atp[c] + ocdca[p] + coa[c] -> h[c] + ppi[c] + stcoa[c] + amp[c]	ECOLC_RS10375 or ECOLC_RS09830	Fatty-acid-CoA ligase (octadecanoate transport via vectoral Co-A coupling)	Cell Envelope Biosynthesis	0	0	1000	0
FACOAL181t2pp	ocdcea[p] + h[p] + atp[c] + coa[c] -> h[c] + odecoa[c] + ppi[c] + amp[c]	ECOLC_RS09830 or ECOLC_RS10375	Fatty-acid-CoA ligase (octadecenoate transport via vectoral Co-A coupling)	Cell Envelope Biosynthesis	0	0	1000	0
FACOAL60t2pp	h[p] + atp[c] + hxa[p] + coa[c] -> h[c] + ppi[c] + hxcoa[c] + amp[c]	ECOLC_RS09830 or ECOLC_RS10375	Fatty-acid-CoA ligase (hexanoate transport via vectoral Co-A coupling)	Cell Envelope Biosynthesis	0	0	1000	0
FACOAL80t2pp	h[p] + atp[c] + octa[p] + coa[c] -> h[c] + occoa[c] + ppi[c] + amp[c]	ECOLC_RS09830 or ECOLC_RS10375	Fatty-acid-CoA ligase (octanoate transport via vectoral Co-A coupling)	Cell Envelope Biosynthesis	0	0	1000	0
FADRx	h[c] + nadh[c] + fad[c] -> fadh2[c] + nad[c]	ECOLC_RS22475	FAD reductase	Cofactor and Prosthetic Group Biosynthesis	0	0	1000	0
FADRx2	h[c] + nadph[c] + fad[c] -> fadh2[c] + nadp[c]	ECOLC_RS05070 and ECOLC_RS05065	FAD reductase	Cofactor and Prosthetic Group Biosynthesis	0	0	1000	0
FADt	fad[c] -> fad[p]	"	FAD transporter, periplasm	Transport Inner Membrane	0	0	1000	0
FADtex	fad[p] <=> fad[e]	"	FAD transport, outer membrane	Transport Outer Membrane	1	-1000	1000	0
FALDH2	nad[c] + hmgth[c] <=> h[c] + Sfglutth[c] + nadh[c]	ECOLC_RS17565	Formaldehyde dehydrogenase	Cofactor and Prosthetic Group Biosynthesis	1	-1000	1000	0
FALDtex	fald[e] <=> fald[p]	ECOLC_RS17950 or ECOLC_RS14330 or ECOLC_RS12200 or ECOLC_RS07685	Formaldehyde transport via diffusion (extracellular to periplasm)	Transport Outer Membrane Porin	1	-1000	1000	0
FALDtpp	fald[p] <=> fald[c]	s0001	Formaldehyde transport via diffusion (periplasm)	Transport Inner Membrane	1	-1000	1000	0
FALGTHLs	gthrd[c] + fald[c] <=> hmgth[c]	s0001	Formaldehyde glutathione ligase (spontaneous)	Cofactor and Prosthetic Group Biosynthesis	1	-1000	1000	0
FBA	fdp[c] <=> dhap[c] + g3p[c]	ECOLC_RS08295 or ECOLC_RS09995 or ECOLC_RS04185	Fructose-bisphosphate aldolase	Glycolysis/Gluconeogenesis	1	-1000	1000	0
FBA3	s17bp[c] <=> dhap[c] + e4p[c]	ECOLC_RS04185	Sedoheptulose 1,7-bisphosphate D-glyceraldehyde-3-phosphate-lyase	Pentose Phosphate Pathway	1	-1000	1000	0
FBP	fdp[c] + h2o[c] -> pi[c] + f6p[c]	ECOLC_RS22055 or ECOLC_RS20325 or ECOLC_RS04160	Fructose-bisphosphatase	Glycolysis/Gluconeogenesis	0	0	1000	0
FCI	fuc__L[c] <=> fcl__L[c]	ECOLC_RS04870	L-fucose isomerase	Alternate Carbon Metabolism	1	-1000	1000	0
FCLK	atp[c] + fcl__L[c] -> h[c] + adp[c] + fc1p[c]	ECOLC_RS04865	L-fuculokinase	Alternate Carbon Metabolism	0	0	1000	0
FCLPA	fc1p[c] <=> dhap[c] + lald__L[c]	ECOLC_RS05195 or ECOLC_RS04880	L-fuculose 1-phosphate aldolase	Alternate Carbon Metabolism	1	-1000	1000	0
FCLT	ppp9[c] + fe2[c] -> 2 h[c] + pheme[c]	ECOLC_RS16890	Ferrochelatase	Cofactor and Prosthetic Group Biosynthesis	0	0	1000	0
FDH4pp	2 h[c] + q8[c] + for[p] -> h[p] + q8h2[c] + co2[p]	(ECOLC_RS22230 and ECOLC_RS22225 and EcolC_4123) or (EcolC_2183 and ECOLC_RS11685 and ECOLC_RS11680)	Formate dehydrogenase (quinone-8) (periplasm)	Oxidative Phosphorylation	0	0	1000	0
FDH5pp	2 h[c] + for[p] + mqn8[c] -> h[p] + co2[p] + mql8[c]	(EcolC_2183 and ECOLC_RS11685 and ECOLC_RS11680) or (ECOLC_RS22230 and ECOLC_RS22225 and EcolC_4123)	Formate Dehydrogenase (menaquinone-8) (periplasm)	Oxidative Phosphorylation	0	0	1000	0
FDMO	o2[c] + isetac[c] + fmnh2[c] -> h[c] + so3[c] + h2o[c] + fmn[c] + gcald[c]	ECOLC_RS14300	FMNH2-dependent monooxygenase	Inorganic Ion Transport and Metabolism	0	0	1000	0
FDMO2	o2[c] + fmnh2[c] + mso3[c] -> h[c] + fald[c] + so3[c] + h2o[c] + fmn[c]	ECOLC_RS14300	FMNH2-dependent monooxygenase (methanesulfonate)	Inorganic Ion Transport and Metabolism	0	0	1000	0
FDMO3	o2[c] + fmnh2[c] + ethso3[c] -> h[c] + so3[c] + h2o[c] + fmn[c] + acald[c]	ECOLC_RS14300	FMNH2-dependent monooxygenase (ethanesulfonate)	Inorganic Ion Transport and Metabolism	0	0	1000	0
FDMO4	o2[c] + butso3[c] + fmnh2[c] -> h[c] + btal[c] + so3[c] + h2o[c] + fmn[c]	ECOLC_RS14300	FMNH2-dependent monooxygenase (butanesulfonate)	Inorganic Ion Transport and Metabolism	0	0	1000	0
FDMO6	sulfac[c] + o2[c] + fmnh2[c] -> h[c] + glx[c] + so3[c] + h2o[c] + fmn[c]	ECOLC_RS14300	FMNH2-dependent monooxygenase (sulfoacetate)	Inorganic Ion Transport and Metabolism	0	0	1000	0
FE2abcpp	fe2[p] + atp[c] + h2o[c] -> h[c] + adp[c] + pi[c] + fe2[c]	ECOLC_RS01620	Iron (II) transport via ABC system (periplasm)	Inorganic Ion Transport and Metabolism	0	0	1000	0
FE2t2pp	fe2[p] + h[p] -> h[c] + fe2[c]	ECOLC_RS06875	Iron (II) transport in via proton symport (periplasm)	Inorganic Ion Transport and Metabolism	0	0	1000	0
FE2t3pp	h[p] + fe2[c] -> h[c] + fe2[p]	ECOLC_RS22105	Iron (Fe+2) transport out via proton antiport (periplasm)	Inorganic Ion Transport and Metabolism	0	0	1000	0
FE2tex	fe2[e] <=> fe2[p]	ECOLC_RS17950 or ECOLC_RS14330 or ECOLC_RS12200 or ECOLC_RS07685	Iron (II) transport via diffusion (extracellular to periplasm)	Transport Outer Membrane Porin	1	-1000	1000	0
FE2tpp	fe2[p] -> fe2[c]	ECOLC_RS03495	Iron (+2) transport in via permease (no H+)	Inorganic Ion Transport and Metabolism	0	0	1000	0
FE3abcpp	atp[c] + h2o[c] + fe3[p] -> h[c] + adp[c] + pi[c] + fe3[c]	"	Iron (III) transport via ABC system (periplasm to cytoplasm)	Inorganic Ion Transport and Metabolism	0	0	1000	0
FE3DCITabcpp	atp[c] + h2o[c] + fe3dcit[p] -> h[c] + adp[c] + pi[c] + fe3[c] + 2 cit[c]	ECOLC_RS03940 and ECOLC_RS03935 and ECOLC_RS03930 and ECOLC_RS03925	Iron transport from ferric-dicitrate via ABC system (periplasm)	Inorganic Ion Transport and Metabolism	0	0	1000	0
FE3DCITexs	2 cit[e] + fe3[e] -> fe3dcit[e]	"	Dicitrate Fe(III) binding (spontaneous)	#N/A	0	0	1000	0
FE3DCITR5	2 fe3dcit[c] + nadph[c] -> h[c] + 2 fe2[c] + nadp[c] + 4 cit[c]	"	Ferric-dicitrate reductase via nadph	Inorganic Ion Transport and Metabolism	0	0	1000	0
FE3DCITtonex	h[p] + fe3dcit[e] -> h[c] + fe3dcit[p]	ECOLC_RS03945 and (ECOLC_RS12725 and ECOLC_RS03670 and ECOLC_RS03665)	Ferric-dicitrate transport via ton system (extracellular)	Transport Outer Membrane	0	0	1000	0
FE3DHBZR	fe3dhbzs[c] -> fe3[c] + 23dhbzs[c]	"	Release of Fe(III) from ferric 2,3-dihydroxybenzoylserine	Inorganic Ion Transport and Metabolism	0	0	1000	0
FE3DHBZS3R	nadph[c] + 2 fe3dhbzs3[c] -> 3 h[c] + 2 fe2[c] + 2 23dhbzs3[c] + nadp[c]	"	Fe(III)-(2,3-dihydroxybenzoylserine)3 reductase via NADPH	Inorganic Ion Transport and Metabolism	0	0	1000	0
FE3DHBZSabcpp	h2o[c] + atp[c] + fe3dhbzs[p] -> pi[c] + adp[c] + h[c] + fe3dhbzs[c]	ECOLC_RS16425 and ECOLC_RS16445 and ECOLC_RS16435 and ECOLC_RS16440	Ferric 2,3-dihydroxybenzoylserine transport via ABC system (periplasm)	Inorganic Ion Transport and Metabolism	0	0	1000	0
FE3DHBZStonex	h[p] + fe3dhbzs[e] -> h[c] + fe3dhbzs[p]	(ECOLC_RS15230 and (ECOLC_RS12725 and ECOLC_RS03670 and ECOLC_RS03665)) or (ECOLC_RS07990 and (ECOLC_RS12725 and ECOLC_RS03670 and ECOLC_RS03665))	Ferric 2,3-dihydroxybenzoylserine transport via ton system (extracellular)	Transport Outer Membrane	0	0	1000	0
FE3HOXabcpp	atp[c] + h2o[c] + fe3hox[p] -> h[c] + adp[c] + pi[c] + fe3hox[c]	ECOLC_RS18835 and ECOLC_RS18845 and ECOLC_RS18840	Ferric-dicitrate transport via ABC system (periplasm)	Inorganic Ion Transport and Metabolism	0	0	1000	0
FE3HOXexs	fe3[e] + fe3hox_un[e] -> fe3hox[e]	s0001	Fe(III) hydroxamate Fe-loading reaction (spontaneaous)	Inorganic Ion Transport and Metabolism	0	0	1000	0
FE3HOXR1	fadh2[c] + 2 fe3hox[c] -> 2 h[c] + 2 fe3hox_un[c] + 2 fe2[c] + fad[c]	"	Fe(III)hydroxamate reductase	Inorganic Ion Transport and Metabolism	0	0	1000	0
FE3HOXR2	fmnh2[c] + 2 fe3hox[c] -> 2 h[c] + 2 fe3hox_un[c] + 2 fe2[c] + fmn[c]	"	Fe(III)hydroxamate reductase	Inorganic Ion Transport and Metabolism	0	0	1000	0
FE3HOXR3	2 fe3hox[c] + rbflvrd[c] -> 2 h[c] + 2 fe3hox_un[c] + 2 fe2[c] + ribflv[c]	"	Fe(III)hydroxamate reductase	Inorganic Ion Transport and Metabolism	0	0	1000	0
FE3HOXtonex	h[p] + fe3hox[e] -> h[c] + fe3hox[p]	ECOLC_RS18850 and (ECOLC_RS12725 and ECOLC_RS03670 and ECOLC_RS03665)	Fe(III)hydroxamine transport via ton system (extracellular)	Transport Outer Membrane	0	0	1000	0
FE3HOXUtex	h[p] + fe3hox_un[c] -> h[c] + fe3hox_un[p]	"	Fe(III)hydroxamate unloaded secretion	Inorganic Ion Transport and Metabolism	0	0	1000	0
FE3HOXUtpp	h[p] + fe3hox_un[p] -> h[c] + fe3hox_un[e]	"	Fe(III)hydroxamate unloaded secretion (extracellular)	Inorganic Ion Transport and Metabolism	0	0	1000	0
FE3Ri	fadh2[c] + 2 fe3[c] -> 2 h[c] + 2 fe2[c] + fad[c]	ECOLC_RS22475	Fe(III) reduction	Cofactor and Prosthetic Group Biosynthesis	0	0	1000	0
FE3tex	fe3[e] <=> fe3[p]	ECOLC_RS17950 or ECOLC_RS14330 or ECOLC_RS12200 or ECOLC_RS07685	Iron (III) transport via diffusion (extracellular to periplasm)	Transport Outer Membrane Porin	1	-1000	1000	0
FECRMabcpp	atp[c] + fecrm[p] + h2o[c] -> h[c] + adp[c] + pi[c] + fecrm[c]	ECOLC_RS18835 and ECOLC_RS18845 and ECOLC_RS18840	Ferrichrome transport via ABC system (periplasm)	Inorganic Ion Transport and Metabolism	0	0	1000	0
FECRMexs	fecrm_un[e] + fe3[e] -> fecrm[e]	s0001	Ferrichrome Fe(III)-loading reaction (spontaneous)	Inorganic Ion Transport and Metabolism	0	0	1000	0
FECRMR1	fadh2[c] + 2 fecrm[c] -> 2 h[c] + 2 fecrm_un[c] + 2 fe2[c] + fad[c]	"	Ferrichrome reductase	Inorganic Ion Transport and Metabolism	0	0	1000	0
FECRMR2	2 fecrm[c] + fmnh2[c] -> 2 h[c] + 2 fecrm_un[c] + 2 fe2[c] + fmn[c]	"	Ferrichrome reductase	Inorganic Ion Transport and Metabolism	0	0	1000	0
FECRMR3	2 fecrm[c] + rbflvrd[c] -> 2 h[c] + 2 fecrm_un[c] + 2 fe2[c] + ribflv[c]	"	Ferrichrome reductase	Inorganic Ion Transport and Metabolism	0	0	1000	0
FECRMtonex	h[p] + fecrm[e] -> h[c] + fecrm[p]	ECOLC_RS18850 and (ECOLC_RS12725 and ECOLC_RS03670 and ECOLC_RS03665)	Ferrichrome transport via ton system (extracellular)	Transport Outer Membrane	0	0	1000	0
FECRMUtex	h[p] + fecrm_un[p] -> h[c] + fecrm_un[e]	"	Ferrichrome (minus Fe) secretion (to extracellular)	Inorganic Ion Transport and Metabolism	0	0	1000	0
FECRMUtpp	h[p] + fecrm_un[c] -> h[c] + fecrm_un[p]	"	Ferrichrome (minus Fe) secretion (to periplasm)	Inorganic Ion Transport and Metabolism	0	0	1000	0
FEENTERabcpp	atp[c] + feenter[p] + h2o[c] -> h[c] + adp[c] + pi[c] + feenter[c]	ECOLC_RS16425 and ECOLC_RS16445 and ECOLC_RS16435 and ECOLC_RS16440	Fe-enterobactin transport via ABC system (periplasm)	Inorganic Ion Transport and Metabolism	0	0	1000	0
FEENTERES	h2o[c] + feenter[c] -> fe3dhbzs3[c]	"	Enterochelin Esterase (Fe containing)	Inorganic Ion Transport and Metabolism	0	0	1000	0
FEENTERexs	enter[e] + fe3[e] -> feenter[e]	s0001	Enterobactin Fe(III) binding (spontaneous)	Inorganic Ion Transport and Metabolism	0	0	1000	0
FEENTERR1	fadh2[c] + 2 feenter[c] -> 2 h[c] + 2 fe2[c] + 2 enter[c] + fad[c]	"	Fe-enterobactin reduction (Fe(III)-unloading)	Inorganic Ion Transport and Metabolism	0	0	1000	0
FEENTERR2	fmnh2[c] + 2 feenter[c] -> 2 h[c] + 2 fe2[c] + fmn[c] + 2 enter[c]	"	Fe-enterobactin reduction (Fe(III)-unloading)	Inorganic Ion Transport and Metabolism	0	0	1000	0
FEENTERR3	rbflvrd[c] + 2 feenter[c] -> 2 h[c] + 2 fe2[c] + ribflv[c] + 2 enter[c]	"	Fe-enterobactin reduction (Fe(III)-unloading)	Inorganic Ion Transport and Metabolism	0	0	1000	0
FEENTERR4	nadph[c] + 2 feenter[c] -> h[c] + 2 fe2[c] + nadp[c] + 2 enter[c]	"	Fe-enterobactin reduction via nadph	Inorganic Ion Transport and Metabolism	0	0	1000	0
FEENTERtex	h[p] + enter[p] -> h[c] + enter[e]	ECOLC_RS03520	Enterochelin transport (secretion periplasm)	Inorganic Ion Transport and Metabolism	0	0	1000	0
FEENTERtonex	feenter[e] + h[p] -> h[c] + feenter[p]	ECOLC_RS16470 and (ECOLC_RS12725 and ECOLC_RS03670 and ECOLC_RS03665)	Fe-enterobactin transport via ton system (extracellular)	Transport Outer Membrane	0	0	1000	0
FEENTERtpp	h[p] + enter[c] -> h[c] + enter[p]	ECOLC_RS16430	Enterochelin transport (secretion)	Transport Inner Membrane	0	0	1000	0
FEOXAMabcpp	atp[c] + h2o[c] + feoxam[p] -> h[c] + adp[c] + pi[c] + feoxam[c]	ECOLC_RS18835 and ECOLC_RS18845 and ECOLC_RS18840	Ferroxamine transport via ABC system (periplasm)	Inorganic Ion Transport and Metabolism	0	0	1000	0
FEOXAMexs	fe3[e] + feoxam_un[e] -> feoxam[e]	s0001	Ferroxamine Fe3-loading reaction (spontaneous)	Inorganic Ion Transport and Metabolism	0	0	1000	0
FEOXAMR1	fadh2[c] + 2 feoxam[c] -> 2 h[c] + 2 fe2[c] + 2 feoxam_un[c] + fad[c]	ECOLC_RS19830	Ferroxamine reductase	Inorganic Ion Transport and Metabolism	0	0	1000	0
FEOXAMR2	2 feoxam[c] + fmnh2[c] -> 2 h[c] + 2 fe2[c] + fmn[c] + 2 feoxam_un[c]	ECOLC_RS19830	Ferroxamine reductase	Inorganic Ion Transport and Metabolism	0	0	1000	0
FEOXAMR3	2 feoxam[c] + rbflvrd[c] -> 2 h[c] + 2 fe2[c] + ribflv[c] + 2 feoxam_un[c]	ECOLC_RS19830	Ferroxamine reductase	Inorganic Ion Transport and Metabolism	0	0	1000	0
FEOXAMtonex	h[p] + feoxam[e] -> h[c] + feoxam[p]	ECOLC_RS18850 and (ECOLC_RS12725 and ECOLC_RS03670 and ECOLC_RS03665)	Ferroxamine transport via ton system (extracellular)	Transport Outer Membrane	0	0	1000	0
FEOXAMUtex	h[p] + feoxam_un[p] -> h[c] + feoxam_un[e]	"	Ferroxamine (minus Fe3) secretion (to extracellular)	Inorganic Ion Transport and Metabolism	0	0	1000	0
FEOXAMUtpp	h[p] + feoxam_un[c] -> h[c] + feoxam_un[p]	"	Ferroxamine (minus Fe3) secretion (to periplasm)	Inorganic Ion Transport and Metabolism	0	0	1000	0
FEROpp	4 fe2[p] + 4 h[p] + o2[p] -> 2 h2o[p] + 4 fe3[p]	ECOLC_RS18990	Ferroxidase	Inorganic Ion Transport and Metabolism	0	0	1000	0
FESD1s	2 h[c] + h2o2[c] + 2 4fe4s[c] -> 2 fe3[c] + 2 h2o[c] + 2 3fe4s[c]	s0001	Iron-sulfur cluster damage (peroxide, spontaneous)	Cofactor and Prosthetic Group Biosynthesis	0	0	1000	0
FESD2s	2 h[c] + 2 no[c] + 2 4fe4s[c] -> n2o[c] + 2 fe3[c] + h2o[c] + 2 3fe4s[c]	s0001	Iron-sulfur cluster damage (nitrous oxide, spontaneous)	Cofactor and Prosthetic Group Biosynthesis	0	0	1000	0
FESR	fe2[c] + 3fe4s[c] -> 4fe4s[c]	ECOLC_RS20420	Iron-sulfur cluster repair	Cofactor and Prosthetic Group Biosynthesis	0	0	1000	0
FHL	h[c] + for[c] -> h2[c] + co2[c]	(EcolC_3948 and (ECOLC_RS06420 and ECOLC_RS06415 and deleted and ECOLC_RS06405 and ECOLC_RS06400 and ECOLC_RS06395 and ECOLC_RS06390 and ECOLC_RS06385 and ECOLC_RS06380 and ECOLC_RS06375)) or (EcolC_3948 and (ECOLC_RS05295 and ECOLC_RS05290 and ECOLC_RS05285 and ECOLC_RS05280 and ECOLC_RS05275 and ECOLC_RS05270))	Formate-hydrogen lyase	Pyruvate Metabolism	0	0	1000	0
FLDR2	2 flxso[c] + nadph[c] -> h[c] + 2 flxr[c] + nadp[c]	(ECOLC_RS15970 and ECOLC_RS22060) or (ECOLC_RS04330 and ECOLC_RS22060)	Flavodoxin reductase (NADPH)	Unassigned	0	0	1000	0
FLVR	h[c] + ribflv[c] + nadph[c] -> nadp[c] + rbflvrd[c]	ECOLC_RS22475 or (ECOLC_RS05070 and ECOLC_RS05065)	Flavin reductase	Cofactor and Prosthetic Group Biosynthesis	0	0	1000	0
FLVRx	h[c] + ribflv[c] + nadh[c] -> nad[c] + rbflvrd[c]	ECOLC_RS22475	Flavin reductase (NAD)	Cofactor and Prosthetic Group Biosynthesis	0	0	1000	0
FMETTRS	10fthf[c] + mettrna[c] -> thf[c] + h[c] + fmettrna[c]	ECOLC_RS02240	Methionyl-tRNA formyltransferase	tRNA Charging	0	0	1000	0
FMNAT	h[c] + atp[c] + fmn[c] -> ppi[c] + fad[c]	ECOLC_RS19490	FMN adenylyltransferase	Cofactor and Prosthetic Group Biosynthesis	0	0	1000	0
FMNRx	h[c] + fmn[c] + nadh[c] -> nad[c] + fmnh2[c]	ECOLC_RS14290 or ECOLC_RS22475	FMN reductase	Cofactor and Prosthetic Group Biosynthesis	0	0	1000	0
FMNRx2	h[c] + fmn[c] + nadph[c] -> nadp[c] + fmnh2[c]	ECOLC_RS22475 or ECOLC_RS14290 or (ECOLC_RS05070 and ECOLC_RS05065)	FMN reductase	Cofactor and Prosthetic Group Biosynthesis	0	0	1000	0
FMNt	fmn[c] -> fmn[p]	"	FMN transporter, periplasm	Transport Inner Membrane	0	0	1000	0
FMNtex	fmn[p] <=> fmn[e]	"	FMN transport, outer membrane	Transport Outer Membrane	1	-1000	1000	0
FOAMtex	frmd[e] <=> frmd[p]	"	Formamide transport via diffusion extracellular to periplasm	Transport Outer Membrane Porin	1	-1000	1000	0
FOMETRi	h[c] + 5fthf[c] -> h2o[c] + methf[c]	ECOLC_RS04250	Aminomethyltransferase	Folate Metabolism	0	0	1000	0
FORCT	oxa[c] + forcoa[c] <=> oxalcoa[c] + for[c]	ECOLC_RS06970	Formyl-CoA Transferase	Alternate Carbon Metabolism	1	-1000	1000	0
FORt2pp	h[p] + for[p] -> h[c] + for[c]	ECOLC_RS14460 or ECOLC_RS06365	Formate transport via proton symport (uptake only, periplasm)	Transport Inner Membrane	0	0	1000	0
FORtex	for[e] <=> for[p]	ECOLC_RS17950 or ECOLC_RS14330 or ECOLC_RS12200 or ECOLC_RS07685	Formate transport via diffusion (extracellular to periplasm)	Transport Outer Membrane Porin	1	-1000	1000	0
FORtppi	for[c] -> for[p]	ECOLC_RS14460 or ECOLC_RS06365	Formate transport via diffusion (cytoplasm to periplasm)	Transport Inner Membrane	0	0	1000	0
FRD2	fum[c] + mql8[c] -> succ[c] + mqn8[c]	ECOLC_RS20755 and ECOLC_RS20750 and ECOLC_RS20745 and ECOLC_RS20740	Fumarate reductase	Citric Acid Cycle	0	0	1000	0
FRD3	2dmmql8[c] + fum[c] -> 2dmmq8[c] + succ[c]	ECOLC_RS20755 and ECOLC_RS20750 and ECOLC_RS20745 and ECOLC_RS20740	Fumarate reductase	Citric Acid Cycle	0	0	1000	0
FRUK	f1p[c] + atp[c] -> h[c] + adp[c] + fdp[c]	ECOLC_RS07925	Fructose-1-phosphate kinase	Alternate Carbon Metabolism	0	0	1000	0
FRULYSDG	frulysp[c] + h2o[c] <=> lys__L[c] + g6p[c]	ECOLC_RS01810	Fructoselysine phosphate deglycase	Alternate Carbon Metabolism	1	-1000	1000	0
FRULYSE	psclys[c] <=> frulys[c]	ECOLC_RS01805	Fructoselysine 3-epimerase	Alternate Carbon Metabolism	1	-1000	1000	0
FRULYSK	atp[c] + frulys[c] -> h[c] + frulysp[c] + adp[c]	ECOLC_RS01800	Fructoselysine Kinase	Alternate Carbon Metabolism	0	0	1000	0
FRULYSt2pp	h[p] + frulys[p] -> h[c] + frulys[c]	ECOLC_RS01815	Fructoselysine transport via proton symport (periplasm)	Transport Inner Membrane	0	0	1000	0
FRULYStex	frulys[e] <=> frulys[p]	ECOLC_RS17950 or ECOLC_RS14330 or ECOLC_RS12200 or ECOLC_RS07685	Fructoselysine transporter via diffusion (extracellular)	Transport Outer Membrane Porin	1	-1000	1000	0
FRUpts2pp	pep[c] + fru[p] -> f6p[c] + pyr[c]	"	Fructose transport via PEP:Pyr PTS (f6p generating) (periplasm)	Transport Inner Membrane	0	0	1000	0
FRUptspp	pep[c] + fru[p] -> f1p[c] + pyr[c]	ECOLC_RS07930 and ECOLC_RS07920 and ECOLC_RS06770 and ECOLC_RS06765	D-fructose transport via PEP:Pyr PTS (periplasm)	Transport Inner Membrane	0	0	1000	0
FRUtex	fru[e] <=> fru[p]	ECOLC_RS17950 or ECOLC_RS14330 or ECOLC_RS12200 or ECOLC_RS07685	D-fructose transport via diffusion (extracellular to periplasm)	Transport Outer Membrane Porin	1	-1000	1000	0
FRUURt2rpp	h[p] + fruur[p] <=> h[c] + fruur[c]	"	D-fructuronate transport via proton symport, reversible (periplasm)	Transport Inner Membrane	1	-1000	1000	0
FRUURtex	fruur[e] <=> fruur[p]	ECOLC_RS17950 or ECOLC_RS14330 or ECOLC_RS12200 or ECOLC_RS07685	D-fructuronate transport via diffusion (extracellular)	Transport Outer Membrane Porin	1	-1000	1000	0
Ftex	f[p] <=> f[e]	"	Fluoride transport via diffusion	Transport Outer Membrane Porin	1	-1000	1000	0
FTHFD	10fthf[c] + h2o[c] -> h[c] + thf[c] + for[c]	ECOLC_RS12830	Formyltetrahydrofolate deformylase	Folate Metabolism	0	0	1000	0
FTHFLi	atp[c] + thf[c] + for[c] -> 10fthf[c] + adp[c] + pi[c]	"	Formate-tetrahydrofolate ligase	Folate Metabolism	0	0	1000	0
Ftpp	f[c] -> f[p]	"	F- efflux transport	Transport Inner Membrane	0	0	1000	0
FUCtex	fuc__L[e] <=> fuc__L[p]	ECOLC_RS17950 or ECOLC_RS14330 or ECOLC_RS12200 or ECOLC_RS07685	L-fucose transport via diffusion (extracellular to periplasm)	Transport Outer Membrane Porin	1	-1000	1000	0
FUCtpp	h[p] + fuc__L[p] <=> h[c] + fuc__L[c]	ECOLC_RS04875	L-fucose transport via proton symport (periplasm)	Transport Inner Membrane	1	-1000	1000	0
FUM	fum[c] + h2o[c] <=> mal__L[c]	ECOLC_RS10840 or ECOLC_RS21005 or ECOLC_RS10845	Fumarase	Citric Acid Cycle	1	-1000	1000	0
FUMt2_2pp	fum[p] + 2 h[p] -> 2 h[c] + fum[c]	ECOLC_RS00990	Fumarate transport via proton symport (2 H) (periplasm)	Transport Inner Membrane	0	0	1000	0
FUMt2_3pp	fum[p] + 3 h[p] -> 2 h[c] + fum[c]	ECOLC_RS20830 or ECOLC_RS21000 or ECOLC_RS16275	Fumarate transport via proton symport (3 H) (periplasm)	Transport Inner Membrane	0	0	1000	0
FUMtex	fum[e] <=> fum[p]	ECOLC_RS17950 or ECOLC_RS14330 or ECOLC_RS12200 or ECOLC_RS07685	Fumarate transport via diffusion (extracellular to periplasm)	Transport Outer Membrane Porin	1	-1000	1000	0
FUSAtex	fusa[e] <=> fusa[p]	ECOLC_RS12200 or ECOLC_RS07685 or ECOLC_RS14330 or ECOLC_RS17950	Fusidic acid transport via diffusion (extracellular to periplasm)	Transport Outer Membrane Porin	1	-1000	1000	0
FUSAtpp	fusa[p] + h[p] -> h[c] + fusa[e]	(ECOLC_RS16955 and ECOLC_RS16960 and ECOLC_RS03520) or (ECOLC_RS16955 and ECOLC_RS06490 and ECOLC_RS03520)	Fusidic acid transport via TolC system	Transport Outer Membrane	0	0	1000	0
G1PACT	gam1p[c] + accoa[c] -> h[c] + acgam1p[c] + coa[c]	ECOLC_RS23030	Glucosamine-1-phosphate N-acetyltransferase	Cell Envelope Biosynthesis	0	0	1000	0
G1PP	g1p[c] + h2o[c] -> pi[c] + glc__D[c]	"	Glucose-1-phosphatase	Glycolysis/Gluconeogenesis	0	0	1000	0
G1PPpp	h2o[p] + g1p[p] -> glc__D[p] + pi[p]	ECOLC_RS13935	Glucose-1-phosphatase	Glycolysis/Gluconeogenesis	0	0	1000	0
G1Ptex	g1p[e] <=> g1p[p]	ECOLC_RS17950 or ECOLC_RS14330 or ECOLC_RS12200 or ECOLC_RS07685	D-glucose 1-phosphate transport via diffusion	Transport Outer Membrane Porin	1	-1000	1000	0
G1PTT	h[c] + dttp[c] + g1p[c] -> ppi[c] + dtdpglu[c]	ECOLC_RS08570 or EcolC_4214	Glucose-1-phosphate thymidylyltransferase	Cell Envelope Biosynthesis	0	0	1000	0
G1SAT	glu1sa[c] <=> 5aop[c]	ECOLC_RS18830	Glutamate-1-semialdehyde aminotransferase	Cofactor and Prosthetic Group Biosynthesis	1	-1000	1000	0
G2PP	glyc2p[c] + h2o[c] -> pi[c] + glyc[c]	ECOLC_RS06155	Glycerol-2-phosphate phosphatase	Alternate Carbon Metabolism	0	0	1000	0
G2PPpp	h2o[p] + glyc2p[p] -> glyc[p] + pi[p]	ECOLC_RS21355	Glycerol 2-phosphate phosphatase (periplasmic)	Alternate Carbon Metabolism	0	0	1000	0
G3PAT120	glyc3p[c] + ddcaACP[c] -> 1ddecg3p[c] + ACP[c]	ECOLC_RS13450 and ECOLC_RS21430	Glycerol-3-phosphate acyltransferase (C12:0)	Glycerophospholipid Metabolism	0	0	1000	0
G3PAT140	glyc3p[c] + myrsACP[c] -> 1tdecg3p[c] + ACP[c]	ECOLC_RS13450 and ECOLC_RS21430	Glycerol-3-phosphate acyltransferase (C14:0)	Glycerophospholipid Metabolism	0	0	1000	0
G3PAT141	glyc3p[c] + tdeACP[c] -> 1tdec7eg3p[c] + ACP[c]	ECOLC_RS13450 and ECOLC_RS21430	Glycerol-3-phosphate acyltransferase (C14:1)	Glycerophospholipid Metabolism	0	0	1000	0
G3PAT160	glyc3p[c] + palmACP[c] -> 1hdecg3p[c] + ACP[c]	ECOLC_RS13450 and ECOLC_RS21430	Glycerol-3-phosphate acyltransferase (C16:0)	Glycerophospholipid Metabolism	0	0	1000	0
G3PAT161	glyc3p[c] + hdeACP[c] -> 1hdec9eg3p[c] + ACP[c]	ECOLC_RS13450 and ECOLC_RS21430	Glycerol-3-phosphate acyltransferase (C16:1)	Glycerophospholipid Metabolism	0	0	1000	0
G3PAT180	glyc3p[c] + ocdcaACP[c] -> 1odecg3p[c] + ACP[c]	ECOLC_RS13450 and ECOLC_RS21430	Glycerol-3-phosphate acyltransferase (C18:0)	Glycerophospholipid Metabolism	0	0	1000	0
G3PAT181	glyc3p[c] + octeACP[c] -> 1odec11eg3p[c] + ACP[c]	ECOLC_RS13450 and ECOLC_RS21430	Glycerol-3-phosphate acyltransferase (C18:1)	Glycerophospholipid Metabolism	0	0	1000	0
G3PCabcpp	atp[c] + g3pc[p] + h2o[c] -> h[c] + g3pc[c] + adp[c] + pi[c]	ECOLC_RS01410 and ECOLC_RS01405 and ECOLC_RS01420 and ECOLC_RS01415	Sn-glycerol-3-phosphocholine transport via ABC system (periplasm)	Transport Inner Membrane	0	0	1000	0
G3PCT	h[c] + ctp[c] + glyc3p[c] -> ppi[c] + cdpglyc[c]	"	Glycerol-3-phosphate cytidylyltransferase	#N/A	0	0	1000	0
G3PCtex	g3pc[e] <=> g3pc[p]	ECOLC_RS17950 or ECOLC_RS14330 or ECOLC_RS12200 or ECOLC_RS07685	Glycero-3-phosphocholine transport via diffusion (extracellular to periplasm)	Transport Outer Membrane Porin	1	-1000	1000	0
G3PD2	glyc3p[c] + nadp[c] <=> h[c] + dhap[c] + nadph[c]	ECOLC_RS00530	Glycerol-3-phosphate dehydrogenase (NADP)	Alternate Carbon Metabolism	1	-1000	1000	0
G3PD5	glyc3p[c] + q8[c] -> dhap[c] + q8h2[c]	(ECOLC_RS07550 and ECOLC_RS07545 and ECOLC_RS07540) or ECOLC_RS01540	Glycerol-3-phosphate dehydrogenase (ubiquinone-8)	Oxidative Phosphorylation	0	0	1000	0
G3PD6	glyc3p[c] + mqn8[c] -> dhap[c] + mql8[c]	ECOLC_RS07550 and ECOLC_RS07545 and ECOLC_RS07540	Glycerol-3-phosphate dehydrogenase (menaquinone-8)	Oxidative Phosphorylation	0	0	1000	0
G3PD7	glyc3p[c] + 2dmmq8[c] -> dhap[c] + 2dmmql8[c]	ECOLC_RS07550 and ECOLC_RS07545 and ECOLC_RS07540	Glycerol-3-phosphate dehydrogenase (demethylmenaquinone-8)	Oxidative Phosphorylation	0	0	1000	0
G3PEabcpp	g3pe[p] + atp[c] + h2o[c] -> h[c] + adp[c] + pi[c] + g3pe[c]	ECOLC_RS01410 and ECOLC_RS01405 and ECOLC_RS01420 and ECOLC_RS01415	Sn-glycerol-3-phosphoethanolamine transport via ABC system (periplasm)	Transport Inner Membrane	0	0	1000	0
G3PEtex	g3pe[e] <=> g3pe[p]	ECOLC_RS14330 or ECOLC_RS12200 or ECOLC_RS07685 or ECOLC_RS17950	Glycero-3-phosphoethanolamine transport via diffusion (extracellular to periplasm)	Transport Outer Membrane Porin	1	-1000	1000	0
G3PGabcpp	atp[c] + h2o[c] + g3pg[p] -> h[c] + g3pg[c] + adp[c] + pi[c]	ECOLC_RS01410 and ECOLC_RS01405 and ECOLC_RS01420 and ECOLC_RS01415	Sn-glycerol-3-phosphoglycerol transport via ABC system (periplasm)	Transport Inner Membrane	0	0	1000	0
G3PGtex	g3pg[e] <=> g3pg[p]	ECOLC_RS17950 or ECOLC_RS14330 or ECOLC_RS12200 or ECOLC_RS07685	Glycerophoglycerol transport via diffusion (extracellular to periplasm)	Transport Outer Membrane Porin	1	-1000	1000	0
G3PIabcpp	atp[c] + h2o[c] + g3pi[p] -> h[c] + adp[c] + pi[c] + g3pi[c]	ECOLC_RS01410 and ECOLC_RS01405 and ECOLC_RS01420 and ECOLC_RS01415	Sn-glycerol-3-phosphoethanolamine transport via ABC system (periplasm)	Transport Inner Membrane	0	0	1000	0
G3PItex	g3pi[e] <=> g3pi[p]	ECOLC_RS17950 or ECOLC_RS14330 or ECOLC_RS12200 or ECOLC_RS07685	Glycero-3-phospho-1-inositol transport via diffusion (extracellular to periplasm)	Transport Outer Membrane Porin	1	-1000	1000	0
G3PSabcpp	atp[c] + h2o[c] + g3ps[p] -> h[c] + g3ps[c] + adp[c] + pi[c]	ECOLC_RS01410 and ECOLC_RS01405 and ECOLC_RS01420 and ECOLC_RS01415	Sn-glycerol-3-phosphoserine transport via ABC system (periplasm)	Transport Inner Membrane	0	0	1000	0
G3PStex	g3ps[e] <=> g3ps[p]	ECOLC_RS17950 or ECOLC_RS14330 or ECOLC_RS12200 or ECOLC_RS07685	Glycerophosphserine transport via diffusion (extracellular to periplasm)	Transport Outer Membrane Porin	1	-1000	1000	0
G3PT	glyc3p[c] + h2o[c] -> pi[c] + glyc[c]	ECOLC_RS15135	Glycerol-3-phosphatase	Alternate Carbon Metabolism	0	0	1000	0
G5SADs	glu5sa[c] -> h[c] + 1pyr5c[c] + h2o[c]	s0001	L-glutamate 5-semialdehyde dehydratase (spontaneous)	Arginine and Proline Metabolism	0	0	1000	0
G5SD	h[c] + nadph[c] + glu5p[c] -> pi[c] + nadp[c] + glu5sa[c]	ECOLC_RS17940	Glutamate-5-semialdehyde dehydrogenase	Arginine and Proline Metabolism	0	0	1000	0
G6PDA	h2o[c] + gam6p[c] -> nh4[c] + f6p[c]	ECOLC_RS16010	Glucosamine-6-phosphate deaminase	Alternate Carbon Metabolism	0	0	1000	0
G6PDH2r	nadp[c] + g6p[c] <=> h[c] + 6pgl[c] + nadph[c]	ECOLC_RS09555	Glucose 6-phosphate dehydrogenase	Pentose Phosphate Pathway	1	-1000	1000	0
G6PP	h2o[c] + g6p[c] -> pi[c] + glc__D[c]	ECOLC_RS15135	Glucose-6-phosphate phosphatase	Glycolysis/Gluconeogenesis	0	0	1000	0
G6Pt6_2pp	g6p[p] + 2 pi[c] -> g6p[c] + 2 pi[p]	ECOLC_RS00185	Glucose-6-phosphate transport via phosphate antiport (periplasm)	Transport Inner Membrane	0	0	1000	0
G6Ptex	g6p[e] <=> g6p[p]	ECOLC_RS17950 or ECOLC_RS14330 or ECOLC_RS12200 or ECOLC_RS07685	Glucose 6-phosphate transport via diffusion (extracellular to periplasm)	Transport Outer Membrane Porin	1	-1000	1000	0
GAL1PPpp	h2o[p] + gal1p[p] -> gal[p] + pi[p]	ECOLC_RS13935	D-galactose 1-phosphatase	Alternate Carbon Metabolism	0	0	1000	0
GAL1Ptex	gal1p[e] <=> gal1p[p]	ECOLC_RS17950 or ECOLC_RS14330 or ECOLC_RS12200 or ECOLC_RS07685	D-galactose 1-phosphate transport via diffusion (extracellular to periplasm)	Transport Outer Membrane Porin	1	-1000	1000	0
GALabcpp	gal[p] + atp[c] + h2o[c] -> h[c] + adp[c] + pi[c] + gal[c]	(ECOLC_RS08030 and ECOLC_RS08025 and ECOLC_RS08035) or (ECOLC_RS20330 and ECOLC_RS20345 and ECOLC_RS20340 and ECOLC_RS20335)	D-galactose transport via ABC system (periplasm)	Transport Inner Membrane	0	0	1000	0
GALAM6PISO	h2o[c] + galam6p[c] -> nh4[c] + tag6p__D[c]	ECOLC_RS02960	N Acetyl D Galactosamine 6 phosphate isomerase	S_Alternate_Carbon_source	0	0	1000	0
GALAMPTSpp	pep[c] + galam[p] -> pyr[c] + galam6p[c]	"	D Galactosamine transport via PEPPyr periplasm	S_Alternate_Carbon_source	0	0	1000	0
GALAMtex	galam[e] <=> galam[p]	ECOLC_RS17950 or ECOLC_RS14330 or ECOLC_RS12200 or ECOLC_RS07685	D Galactosamine transport transport via diffusion extracellular to periplasm	S_Transport_Outer_Membrane_Porin	1	-1000	1000	0
GALBDtex	gal_bD[e] <=> gal_bD[p]	ECOLC_RS17950 or ECOLC_RS14330 or ECOLC_RS12200 or ECOLC_RS07685	Beta D-galactose transport via diffusion (extracellular to periplasm)	Transport Outer Membrane Porin	1	-1000	1000	0
GALCTD	galct__D[c] -> 5dh4dglc[c] + h2o[c]	ECOLC_RS03035	Galactarate dehydratase	Alternate Carbon Metabolism	0	0	1000	0
GALCTLO	nad[c] + galctn__L[c] -> h[c] + tagur[c] + nadh[c]	ECOLC_RS19875	L-galactonate oxidoreductase	Alternate Carbon Metabolism	0	0	1000	0
GALCTND	galctn__D[c] -> h2o[c] + 2dh3dgal[c]	ECOLC_RS00060	Galactonate dehydratase	Alternate Carbon Metabolism	0	0	1000	0
GALCTNLt2pp	h[p] + galctn__L[p] -> h[c] + galctn__L[c]	ECOLC_RS19885	L-galactonate transport via proton symport (periplasm)	Transport Inner Membrane	0	0	1000	0
GALCTNLtex	galctn__L[e] <=> galctn__L[p]	ECOLC_RS07685 or ECOLC_RS12200 or ECOLC_RS14330 or ECOLC_RS17950	L-galactonate transport via diffusion (extracellular to periplasm)	Transport Outer Membrane Porin	1	-1000	1000	0
GALCTNt2pp	h[p] + galctn__D[p] -> h[c] + galctn__D[c]	ECOLC_RS00065	D-galactonate transport via proton symport (periplasm)	Transport Inner Membrane	0	0	1000	0
GALCTNtex	galctn__D[e] <=> galctn__D[p]	ECOLC_RS17950 or ECOLC_RS14330 or ECOLC_RS12200 or ECOLC_RS07685	D-galactonate transport via diffusion (extracellular to periplasm)	Transport Outer Membrane Porin	1	-1000	1000	0
GALCTt2rpp	h[p] + galct__D[p] <=> h[c] + galct__D[c]	ECOLC_RS04940 or ECOLC_RS03045	D-galactarte transport via proton symport, reversible (periplasm)	Transport Inner Membrane	1	-1000	1000	0
GALCTtex	galct__D[e] <=> galct__D[p]	ECOLC_RS17950 or ECOLC_RS14330 or ECOLC_RS12200 or ECOLC_RS07685	D-galactarte transport via diffusion (extracellular to periplasm)	Transport Outer Membrane Porin	1	-1000	1000	0
GALKr	atp[c] + gal[c] <=> h[c] + adp[c] + gal1p[c]	ECOLC_RS08535 or ECOLC_RS15570	Galactokinase	Alternate Carbon Metabolism	1	-1000	1000	0
GALM2pp	gal_bD[p] -> gal[p]	ECOLC_RS15575	Aldose-1-epimerase	Alternate Carbon Metabolism	0	0	1000	0
GALR1TRA1	udpgal[c] + gggicolipaAR1[c] -> h[c] + udp[c] + gagggicolipaAR1[c]	"	Galactosyltransferase I LPS R1 core synthesis	S_Lipopolysaccharide_Biosynthesis___Recycling	0	0	1000	0
GALR1TRA2	udpgal[c] + gagggicolipaAR1[c] -> h[c] + udp[c] + colipa[c]	"	Galactosyltransferase II LPS R1 core synthesis	S_Lipopolysaccharide_Biosynthesis___Recycling	0	0	1000	0
GALR1TRB1	udpgal[c] + gggicolipaBR1[c] -> h[c] + udp[c] + gagggicolipaBR1[c]	"	Galactosyltransferase I LPS R1 core synthesis	S_Lipopolysaccharide_Biosynthesis___Recycling	0	0	1000	0
GALR1TRB2	udpgal[c] + gagggicolipaBR1[c] -> h[c] + udp[c] + colipaB[c]	"	Galactosyltransferase II LPS R1 core synthesis	S_Lipopolysaccharide_Biosynthesis___Recycling	0	0	1000	0
GALS3	h2o[c] + melib[c] -> glc__D[c] + gal[c]	ECOLC_RS21020	A-galactosidase (melibiose)	Alternate Carbon Metabolism	0	0	1000	0
GALT1	gicolipa[c] + udpg[c] -> h[c] + gagicolipa[c] + udp[c]	"	Galactosyltransferase I (LPS core synthesis)	Lipopolysaccharide Biosynthesis / Recycling	0	0	1000	0
GALt2pp	h[p] + gal[p] -> h[c] + gal[c]	ECOLC_RS04100	D-galactose transport in via proton symport (periplasm)	Transport Inner Membrane	0	0	1000	0
GALtex	gal[e] <=> gal[p]	ECOLC_RS17950 or ECOLC_RS14330 or ECOLC_RS12200 or ECOLC_RS07685	D-galactose transport via diffusion (extracellular to periplasm)	Transport Outer Membrane Porin	1	-1000	1000	0
GALTptspp	pep[c] + galt[p] -> galt1p[c] + pyr[c]	ECOLC_RS08310 and ECOLC_RS08315 and ECOLC_RS08320 and ECOLC_RS06770 and ECOLC_RS06765	Galactitol transport via PEP:Pyr PTS (periplasm)	Transport Inner Membrane	0	0	1000	0
GALTtex	galt[e] <=> galt[p]	ECOLC_RS17950 or ECOLC_RS14330 or ECOLC_RS12200 or ECOLC_RS07685	Galactitol transport via diffusion (extracellular to periplasm)	Transport Outer Membrane Porin	1	-1000	1000	0
GALUi	h[c] + utp[c] + g1p[c] -> ppi[c] + udpg[c]	ECOLC_RS12810	UTP-glucose-1-phosphate uridylyltransferase (irreversible)	Cell Envelope Biosynthesis	0	0	1000	0
GALURt2rpp	h[p] + galur[p] <=> h[c] + galur[c]	ECOLC_RS03215	D-galacturonate transport via proton symport, reversible (periplasm)	Transport Inner Membrane	1	-1000	1000	0
GALURtex	galur[e] <=> galur[p]	ECOLC_RS17950 or ECOLC_RS14330 or ECOLC_RS12200 or ECOLC_RS07685	D-galacturonate transport via diffusion (extracellular to periplasm)	Transport Outer Membrane Porin	1	-1000	1000	0
GAM6Pt6_2pp	2 pi[c] + gam6p[p] -> gam6p[c] + 2 pi[p]	ECOLC_RS00185	D-Glucosamine 6-phosphate transport via phosphate antiport (periplasm)	Transport Inner Membrane	0	0	1000	0
GAMAN6Ptex	gam6p[e] <=> gam6p[p]	ECOLC_RS17950 or ECOLC_RS14330 or ECOLC_RS12200 or ECOLC_RS07685	D-glucosamine 6-phosphate transport via diffusion (extracellular to periplasm)	Transport Outer Membrane Porin	1	-1000	1000	0
GAMptspp	pep[c] + gam[p] -> gam6p[c] + pyr[c]	"	D-glucosamine transport via PEP:Pyr PTS (periplasm)	Transport Inner Membrane	0	0	1000	0
GAMtex	gam[e] <=> gam[p]	ECOLC_RS17950 or ECOLC_RS14330 or ECOLC_RS12200 or ECOLC_RS07685	D-glucosamine transport via diffusion (extracellular to periplasm)	Transport Outer Membrane Porin	1	-1000	1000	0
GAPD	nad[c] + g3p[c] + pi[c] <=> 13dpg[c] + h[c] + nadh[c]	ECOLC_RS09965	Glyceraldehyde-3-phosphate dehydrogenase	Glycolysis/Gluconeogenesis	1	-1000	1000	0
GAPP	g3p[c] + h2o[c] -> glyald[c] + pi[c]	"	Glyceraldehyde-3-phosphate phosphatase	Alternate Carbon Metabolism	0	0	1000	0
GARFT	10fthf[c] + gar[c] <=> h[c] + thf[c] + fgam[c]	ECOLC_RS06325	Phosphoribosylglycinamide formyltransferase	Purine and Pyrimidine Biosynthesis	1	-1000	1000	0
GART	atp[c] + for[c] + gar[c] -> h[c] + adp[c] + pi[c] + fgam[c]	ECOLC_RS09570	GAR transformylase-T	Purine and Pyrimidine Biosynthesis	0	0	1000	0
GBBTNtex	gbbtn[e] <=> gbbtn[p]	ECOLC_RS17950 or ECOLC_RS14330 or ECOLC_RS12200 or ECOLC_RS07685	Gamma-butyrobetaine transport via diffusion (extracellular to periplasm)	Transport Outer Membrane Porin	1	-1000	1000	0
GCALDD	nad[c] + h2o[c] + gcald[c] -> 2 h[c] + glyclt[c] + nadh[c]	ECOLC_RS12015	Glycolaldehyde dehydrogenase	Folate Metabolism	0	0	1000	0
GDMANE	gdpddman[c] -> gdpofuc[c]	ECOLC_RS08500	GDP-4-dehydro-6-deoxy-D-mannose epimerase	Cell Envelope Biosynthesis	0	0	1000	0
GDPDPK	atp[c] + gdp[c] -> h[c] + ppgpp[c] + amp[c]	ECOLC_RS04965 or ECOLC_RS00335	GDP diphosphokinase	Cofactor and Prosthetic Group Biosynthesis	0	0	1000	0
GDPMNH	gdpmann[c] + h2o[c] -> h[c] + gdp[c] + man[c]	ECOLC_RS08505	GDP-mannose mannosyl hydrolase	Cell Envelope Biosynthesis	0	0	1000	0
GDPMNP	gdpmann[c] + h2o[c] -> 2 h[c] + man1p[c] + gmp[c]	ECOLC_RS06505	GDP-mannose phyrophosphatase	Cell Envelope Biosynthesis	0	0	1000	0
GDPtex	gdp[e] <=> gdp[p]	ECOLC_RS12200 or ECOLC_RS07685 or ECOLC_RS14330 or ECOLC_RS17950	GDP transport via diffusion (extracellular to periplasm)	Transport Outer Membrane Porin	1	-1000	1000	0
GDPTPDP	gdptp[c] + h2o[c] -> ppi[c] + gtp[c]	ECOLC_RS00335	Guanosine 3-diphosphate 5-triphosphate 3-diphosphatase	Cofactor and Prosthetic Group Biosynthesis	0	0	1000	0
GF6PTA	gln__L[c] + f6p[c] -> glu__L[c] + gam6p[c]	ECOLC_RS23035	Glutamine-fructose-6-phosphate transaminase	Cell Envelope Biosynthesis	0	0	1000	0
GGGABADr	nadp[c] + h2o[c] + ggbutal[c] <=> gg4abut[c] + 2 h[c] + nadph[c]	ECOLC_RS12450	Gamma-glutamyl-gamma aminobutyric acid dehydrogenase	Alternate Carbon Metabolism	1	-1000	1000	0
GGGABAH	gg4abut[c] + h2o[c] -> glu__L[c] + 4abut[c]	ECOLC_RS12460	Gamma-glutamyl-gamma-aminobutyric acid hydrolase	Alternate Carbon Metabolism	0	0	1000	0
GGPTRCO	o2[c] + ggptrc[c] + h2o[c] -> nh4[c] + h2o2[c] + ggbutal[c]	ECOLC_RS12445	Gamma glutamyl putrescine oxidase	Alternate Carbon Metabolism	0	0	1000	0
GGPTRCS	atp[c] + glu__L[c] + ptrc[c] -> h[c] + adp[c] + pi[c] + ggptrc[c]	ECOLC_RS12465	Gamma glutamyl putrescine synthase	Alternate Carbon Metabolism	0	0	1000	0
GHBDHx	h[c] + nadh[c] + sucsal[c] <=> nad[c] + ghb[c]	ECOLC_RS22300	Gamma-hydroxybutyrate dehydrogenase (NADH)	Arginine and Proline Metabolism	1	-1000	1000	0
GHMT2r	ser__L[c] + thf[c] <=> mlthf[c] + h2o[c] + gly[c]	ECOLC_RS06065	Glycine hydroxymethyltransferase, reversible	Glycine and Serine Metabolism	1	-1000	1000	0
GK1	atp[c] + gmp[c] <=> adp[c] + gdp[c]	ECOLC_RS00345	Guanylate kinase (GMP:ATP)	Nucleotide Salvage Pathway	1	-1000	1000	0
GLBRAN2	glycogen[c] -> bglycogen[c]	ECOLC_RS01500	1,4-alpha-glucan branching enzyme (glycogen -> bglycogen)	Glycolysis/Gluconeogenesis	0	0	1000	0
GLCabcpp	atp[c] + h2o[c] + glc__D[p] -> h[c] + adp[c] + pi[c] + glc__D[c]	ECOLC_RS08030 and ECOLC_RS08025 and ECOLC_RS08035	D-glucose transport via ABC system (periplasm)	Transport Inner Membrane	0	0	1000	0
GLCATr	accoa[c] + glc__D[c] <=> acglc__D[c] + coa[c]	ECOLC_RS16975	D-glucose O-acetyltransferase	Alternate Carbon Metabolism	1	-1000	1000	0
GLCDpp	h2o[p] + q8[c] + glc__D[p] -> h[p] + glcn[p] + q8h2[c]	ECOLC_RS18985 or ECOLC_RS15050	Glucose dehydrogenase (ubiquinone-8 as acceptor) (periplasm)	Oxidative Phosphorylation	0	0	1000	0
GLCNt2rpp	h[p] + glcn[p] <=> h[c] + glcn[c]	deleted or ECOLC_RS01485 or ECOLC_RS01590 or deleted	D-gluconate transport via proton symport, reversible (periplasm)	Transport Inner Membrane	1	-1000	1000	0
GLCNtex	glcn[e] <=> glcn[p]	ECOLC_RS17950 or ECOLC_RS14330 or ECOLC_RS12200 or ECOLC_RS07685	D-gluconate transport via diffusion (extracellular to periplasm)	Transport Outer Membrane Porin	1	-1000	1000	0
GLCOAS	coa[c] + atp[c] + glutar[c] -> pi[c] + adp[c] + glutcoa[c]	"	Glutaryl-CoA synthetase	Lysine Metabolism	0	0	1000	0
GLCP	pi[c] + glycogen[c] -> g1p[c]	ECOLC_RS01520 or ECOLC_RS01580	Glycogen phosphorylase	Glycolysis/Gluconeogenesis	0	0	1000	0
GLCptspp	pep[c] + glc__D[p] -> g6p[c] + pyr[c]	(ECOLC_RS06760 and ECOLC_RS00105 and ECOLC_RS06770 and ECOLC_RS06765) or (ECOLC_RS06760 and ECOLC_RS13415 and ECOLC_RS06770 and ECOLC_RS06765) or (deleted and ECOLC_RS09750 and ECOLC_RS09745 and ECOLC_RS06770 and ECOLC_RS06765)	D-glucose transport via PEP:Pyr PTS (periplasm)	Transport Inner Membrane	0	0	1000	0
GLCR1TRA1	udpg[c] + gicolipaAR1[c] -> h[c] + udp[c] + ggicolipaAR1[c]	"	Glucosyltransferase I LPS R1 core synthesis	S_Lipopolysaccharide_Biosynthesis___Recycling	0	0	1000	0
GLCR1TRA2	udpg[c] + ggicolipaAR1[c] -> h[c] + udp[c] + gggicolipaAR1[c]	"	"	#N/A	0	0	1000	0
GLCR1TRB1	udpg[c] + gicolipaBR1[c] -> h[c] + udp[c] + ggicolipaBR1[c]	"	Glucosyltransferase I LPS R1 core synthesis	S_Lipopolysaccharide_Biosynthesis___Recycling	0	0	1000	0
GLCRAL	5dh4dglc[c] -> 2h3oppan[c] + pyr[c]	ECOLC_RS03050	5-dehydro-4-deoxyglucarate aldolase	Alternate Carbon Metabolism	0	0	1000	0
GLCRD	glcr[c] -> 5dh4dglc[c] + h2o[c]	ECOLC_RS04945 or ECOLC_RS04950	Glucarate dehydratase	Alternate Carbon Metabolism	0	0	1000	0
GLCRt2rpp	h[p] + glcr[p] <=> h[c] + glcr[c]	ECOLC_RS03045 or ECOLC_RS04940	D-glucarate transport via proton symport, reversible (periplasm)	Transport Inner Membrane	1	-1000	1000	0
GLCRtex	glcr[e] <=> glcr[p]	ECOLC_RS17950 or ECOLC_RS14330 or ECOLC_RS12200 or ECOLC_RS07685	D-glucarate transport via diffusion (extracellular to periplasm)	Transport Outer Membrane Porin	1	-1000	1000	0
GLCS1	adpglc[c] -> h[c] + adp[c] + glycogen[c]	ECOLC_RS01515	Glycogen synthase (ADPGlc)	Glycolysis/Gluconeogenesis	0	0	1000	0
GLCt2pp	h[p] + glc__D[p] -> h[c] + glc__D[c]	ECOLC_RS04100	D-glucose transport in via proton symport (periplasm)	Transport Inner Membrane	0	0	1000	0
GLCtex	glc__D[e] <=> glc__D[p]	"	Glucose transport via diffusion (extracellular to periplasm)	Transport Outer Membrane	1	-1000	1000	0
GLCTR1	icolipa[c] + udpg[c] -> h[c] + gicolipa[c] + udp[c]	ECOLC_RS00430	Glucosyltransferase I (LPS core synthesis)	Lipopolysaccharide Biosynthesis / Recycling	0	0	1000	0
GLCTR2	udpg[c] + gagicolipa[c] -> h[c] + ggagicolipa[c] + udp[c]	ECOLC_RS00440	Glucosyltransferase II (LPS core synthesis)	Lipopolysaccharide Biosynthesis / Recycling	0	0	1000	0
GLCTR3	ggagicolipa[c] + udpg[c] -> h[c] + gggagicolipa[c] + udp[c]	ECOLC_RS00445	Glucosyltransferase III (LPS core synthesis)	Lipopolysaccharide Biosynthesis / Recycling	0	0	1000	0
GLCTRA1	udpg[c] + icolipaAR1[c] -> h[c] + udp[c] + gicolipaAR1[c]	ECOLC_RS00430	"	#N/A	0	0	1000	0
GLCUR1Ptex	glcur1p[e] <=> glcur1p[p]	ECOLC_RS17950 or ECOLC_RS14330 or ECOLC_RS12200 or ECOLC_RS07685	D-glucuronate 1-phosphate transport via diffusion (extracellular to periplasm)	Transport Outer Membrane Porin	1	-1000	1000	0
GLCURt2rpp	h[p] + glcur[p] <=> h[c] + glcur[c]	ECOLC_RS22130 or ECOLC_RS03215	D-glucuronate transport via proton symport, reversible (periplasm)	Transport Inner Membrane	1	-1000	1000	0
GLCURtex	glcur[e] <=> glcur[p]	ECOLC_RS17950 or ECOLC_RS14330 or ECOLC_RS12200 or ECOLC_RS07685	D-glucuronat transport via diffusion (extracellular to periplasm)	Transport Outer Membrane Porin	1	-1000	1000	0
GLDBRAN2	bglycogen[c] -> glycogen[c]	ECOLC_RS01505	Glycogen debranching enzyme (bglycogen -> glycogen)	Glycolysis/Gluconeogenesis	0	0	1000	0
GLGC	h[c] + atp[c] + g1p[c] -> adpglc[c] + ppi[c]	ECOLC_RS01510	Glucose-1-phosphate adenylyltransferase	Glycolysis/Gluconeogenesis	0	0	1000	0
GLNabcpp	atp[c] + gln__L[p] + h2o[c] -> h[c] + adp[c] + pi[c] + gln__L[c]	ECOLC_RS15200 and ECOLC_RS15205 and ECOLC_RS15210	L-glutamine transport via ABC system (periplasm)	Transport Inner Membrane	0	0	1000	0
GLNS	nh4[c] + atp[c] + glu__L[c] -> h[c] + adp[c] + pi[c] + gln__L[c]	ECOLC_RS22340 or ECOLC_RS12465	Glutamine synthetase	Glutamate Metabolism	0	0	1000	0
GLNtex	gln__L[e] <=> gln__L[p]	ECOLC_RS17950 or ECOLC_RS14330 or ECOLC_RS12200 or ECOLC_RS07685	L-glutamine transport via diffusion (extracellular to periplasm)	Transport Outer Membrane Porin	1	-1000	1000	0
GLNTRS	atp[c] + gln__L[c] + trnagln[c] -> ppi[c] + amp[c] + glntrna[c]	ECOLC_RS16000	Glutaminyl-tRNA synthetase	tRNA Charging	0	0	1000	0
GLTPD	nad[c] + galt1p[c] <=> h[c] + tag6p__D[c] + nadh[c]	ECOLC_RS08325	Galactitol-1-phosphate dehydrogenase	Alternate Carbon Metabolism	1	-1000	1000	0
GLU5K	atp[c] + glu__L[c] -> adp[c] + glu5p[c]	ECOLC_RS17945	Glutamate 5-kinase	Arginine and Proline Metabolism	0	0	1000	0
GLUabcpp	atp[c] + h2o[c] + glu__L[p] -> h[c] + adp[c] + pi[c] + glu__L[c]	ECOLC_RS16105 and ECOLC_RS16110 and ECOLC_RS16115 and ECOLC_RS16120	L-glutamate transport via ABC system (periplasm)	Transport Inner Membrane	0	0	1000	0
GLUABUTt7pp	4abut[c] + glu__L[p] <=> 4abut[p] + glu__L[c]	ECOLC_RS11600	4-aminobutyrate/glutamate antiport (periplasm)	Transport Inner Membrane	1	-1000	1000	0
GLUCYS	cys__L[c] + atp[c] + glu__L[c] -> h[c] + adp[c] + pi[c] + glucys[c]	ECOLC_RS05455	Gamma-glutamylcysteine synthetase	Cofactor and Prosthetic Group Biosynthesis	0	0	1000	0
GLUDC	h[c] + glu__L[c] -> 4abut[c] + co2[c]	ECOLC_RS01050 or ECOLC_RS11595	Glutamate Decarboxylase	Glutamate Metabolism	0	0	1000	0
GLUDy	nadp[c] + glu__L[c] + h2o[c] <=> h[c] + akg[c] + nh4[c] + nadph[c]	ECOLC_RS10065	Glutamate dehydrogenase (NADP)	Glutamate Metabolism	1	-1000	1000	0
GLUN	gln__L[c] + h2o[c] -> nh4[c] + glu__L[c]	ECOLC_RS09795 or ECOLC_RS16840 or ECOLC_RS11440	Glutaminase	Glutamate Metabolism	0	0	1000	0
GLUNpp	h2o[p] + gln__L[p] -> nh4[p] + glu__L[p]	ECOLC_RS04030	Glutaminase	Glutamate Metabolism	0	0	1000	0
GLUPRT	gln__L[c] + h2o[c] + prpp[c] -> ppi[c] + glu__L[c] + pram[c]	ECOLC_RS07200	Glutamine phosphoribosyldiphosphate amidotransferase	Purine and Pyrimidine Biosynthesis	0	0	1000	0
GLUR	glu__D[c] <=> glu__L[c]	ECOLC_RS21815	Glutamate racemase	Cell Envelope Biosynthesis	1	-1000	1000	0
GLUSy	h[c] + akg[c] + gln__L[c] + nadph[c] -> nadp[c] + 2 glu__L[c]	ECOLC_RS02600 and ECOLC_RS02595	Glutamate synthase (NADPH)	Glutamate Metabolism	0	0	1000	0
GLUt2rpp	h[p] + glu__L[p] <=> h[c] + glu__L[c]	ECOLC_RS21245	L-glutamate transport via proton symport, reversible (periplasm)	Transport Inner Membrane	1	-1000	1000	0
GLUt4pp	na1[p] + glu__L[p] -> glu__L[c] + na1[c]	ECOLC_RS00320	Na+/glutamate symport (periplasm)	Transport Inner Membrane	0	0	1000	0
GLUtex	glu__L[e] <=> glu__L[p]	ECOLC_RS17950 or ECOLC_RS14330 or ECOLC_RS12200 or ECOLC_RS07685	L-glutamate transport via diffusion (extracellular to periplasm)	Transport Outer Membrane Porin	1	-1000	1000	0
GLUTRR	h[c] + glutrna[c] + nadph[c] -> glu1sa[c] + nadp[c] + trnaglu[c]	ECOLC_RS12955	Glutamyl-tRNA reductase	Cofactor and Prosthetic Group Biosynthesis	0	0	1000	0
GLUTRS	atp[c] + glu__L[c] + trnaglu[c] -> glutrna[c] + ppi[c] + amp[c]	ECOLC_RS06835	Glutamyl-tRNA synthetase	Cofactor and Prosthetic Group Biosynthesis	0	0	1000	0
GLXCL	h[c] + 2 glx[c] -> 2h3oppan[c] + co2[c]	ECOLC_RS16760	Glyoxalate carboligase	Glyoxylate Metabolism	0	0	1000	0
GLYALDtex	glyald[e] <=> glyald[p]	ECOLC_RS17950 or ECOLC_RS14330 or ECOLC_RS12200 or ECOLC_RS07685	Glyceraldehyde transport via diffusion (extracellular to periplasm)	Transport Outer Membrane Porin	1	-1000	1000	0
GLYALDtpp	glyald[p] <=> glyald[c]	ECOLC_RS22045	Glyceraldehyde facilitated diffusion (periplasm)	Transport Inner Membrane	1	-1000	1000	0
GLYAT	accoa[c] + gly[c] <=> 2aobut[c] + coa[c]	ECOLC_RS00485	Glycine C-acetyltransferase	Glycine and Serine Metabolism	1	-1000	1000	0
GLYBabcpp	atp[c] + h2o[c] + glyb[p] -> h[c] + glyb[c] + adp[c] + pi[c]	ECOLC_RS08135 and ECOLC_RS08130 and ECOLC_RS08125 and ECOLC_RS08120	Glycine betaine transport via ABC system (periplasm)	Transport Inner Membrane	0	0	1000	0
GLYBt2pp	h[p] + glyb[p] -> h[c] + glyb[c]	ECOLC_RS09850 or ECOLC_RS21070	"	Transport Inner Membrane	0	0	1000	0
GLYBtex	glyb[e] <=> glyb[p]	ECOLC_RS17950 or ECOLC_RS14330 or ECOLC_RS12200 or ECOLC_RS07685	Glycine betaine transport via diffusion (extracellular to periplasm)	Transport Outer Membrane Porin	1	-1000	1000	0
GLYC2Pabcpp	atp[c] + glyc2p[p] + h2o[c] -> h[c] + adp[c] + pi[c] + glyc2p[c]	ECOLC_RS01410 and ECOLC_RS01405 and ECOLC_RS01420 and ECOLC_RS01415	Sn-Glycerol 2-phosphate transport via ABC system (periplasm)	Transport Inner Membrane	0	0	1000	0
GLYC2Ptex	glyc2p[e] <=> glyc2p[p]	ECOLC_RS07685 or ECOLC_RS17950 or ECOLC_RS14330 or ECOLC_RS12200	Glycerol-2-phosphate transport via diffusion (extracellular to periplasm)	Transport Outer Membrane Porin	1	-1000	1000	0
GLYC3Pabcpp	atp[c] + h2o[c] + glyc3p[p] -> h[c] + glyc3p[c] + adp[c] + pi[c]	ECOLC_RS01410 and ECOLC_RS01405 and ECOLC_RS01420 and ECOLC_RS01415	Sn-Glycerol 3-phosphate transport via ABC system (periplasm)	Transport Inner Membrane	0	0	1000	0
GLYC3Pt6pp	pi[c] + glyc3p[p] -> glyc3p[c] + pi[p]	ECOLC_RS07555	Glycerol-3-phosphate : phosphate antiporter (periplasm)	Transport Inner Membrane	0	0	1000	0
GLYC3Ptex	glyc3p[e] <=> glyc3p[p]	ECOLC_RS17950 or ECOLC_RS14330 or ECOLC_RS12200 or ECOLC_RS07685	Glycerol-3-phosphate transport via diffusion (extracellular to periplasm)	Transport Outer Membrane Porin	1	-1000	1000	0
GLYCAt2rpp	h[p] + glyc__R[p] <=> h[c] + glyc__R[c]	ECOLC_RS04940 or ECOLC_RS03045	D-glycerate transport via proton symport, reversible (periplasm)	Transport Inner Membrane	1	-1000	1000	0
GLYCAtex	glyc__R[e] <=> glyc__R[p]	ECOLC_RS17950 or ECOLC_RS14330 or ECOLC_RS12200 or ECOLC_RS07685	D-glycerate transport via diffusion (extracellular to periplasm)	Transport Outer Membrane Porin	1	-1000	1000	0
GLYCDx	nad[c] + glyc[c] -> h[c] + dha[c] + nadh[c]	ECOLC_RS21920	Glycerol dehydrogenase	Alternate Carbon Metabolism	0	0	1000	0
GLYCK	atp[c] + glyc__R[c] -> h[c] + 3pg[c] + adp[c]	ECOLC_RS16730	Glycerate kinase	Glyoxylate Metabolism	0	0	1000	0
GLYCL	nad[c] + thf[c] + gly[c] -> nh4[c] + mlthf[c] + nadh[c] + co2[c]	ECOLC_RS04285 and ECOLC_RS04290 and ECOLC_RS04280 and ECOLC_RS19025	Glycine Cleavage System	Folate Metabolism	0	0	1000	0
GLYCLTDx	h[c] + glx[c] + nadh[c] -> glyclt[c] + nad[c]	ECOLC_RS00845 or ECOLC_RS13770	Glycolate dehydrogenase (NAD)	Glyoxylate Metabolism	0	0	1000	0
GLYCLTDy	h[c] + glx[c] + nadph[c] -> glyclt[c] + nadp[c]	ECOLC_RS13770 or ECOLC_RS00845	Glycolate dehydrogenase (NADP)	Glyoxylate Metabolism	0	0	1000	0
GLYCLTt2rpp	h[p] + glyclt[p] <=> h[c] + glyclt[c]	ECOLC_RS00555 or ECOLC_RS03855	Glycolate transport via proton symport, reversible (periplasm)	Transport Inner Membrane	1	-1000	1000	0
GLYCLTt4pp	na1[p] + glyclt[p] -> glyclt[c] + na1[c]	ECOLC_RS21295	Glycolate transport via sodium symport (periplasm)	Transport Inner Membrane	0	0	1000	0
GLYCLTtex	glyclt[e] <=> glyclt[p]	ECOLC_RS17950 or ECOLC_RS14330 or ECOLC_RS12200 or ECOLC_RS07685	Glycolate transport via diffusion (extracellular to periplasm)	Transport Outer Membrane Porin	1	-1000	1000	0
GLYCtex	glyc[e] <=> glyc[p]	ECOLC_RS17950 or ECOLC_RS14330 or ECOLC_RS12200 or ECOLC_RS07685	Glycerol transport via diffusion (extracellular to periplasm)	Transport Outer Membrane Porin	1	-1000	1000	0
GLYCTO2	glyclt[c] + q8[c] -> glx[c] + q8h2[c]	ECOLC_RS03830 and ECOLC_RS03840 and ECOLC_RS03835	Glycolate oxidase	Alternate Carbon Metabolism	0	0	1000	0
GLYCTO3	glyclt[c] + mqn8[c] -> glx[c] + mql8[c]	ECOLC_RS03830 and ECOLC_RS03840 and ECOLC_RS03835	Glycolate oxidase	Alternate Carbon Metabolism	0	0	1000	0
GLYCTO4	glyclt[c] + 2dmmq8[c] -> glx[c] + 2dmmql8[c]	ECOLC_RS03830 and ECOLC_RS03840 and ECOLC_RS03835	Glycolate oxidase	Alternate Carbon Metabolism	0	0	1000	0
GLYCtpp	glyc[c] <=> glyc[p]	ECOLC_RS22045 or s0001	Glycerol transport via channel (periplasm)	Transport Inner Membrane	1	-1000	1000	0
GLYK	atp[c] + glyc[c] -> h[c] + glyc3p[c] + adp[c]	ECOLC_RS22050	Glycerol kinase	Alternate Carbon Metabolism	0	0	1000	0
GLYOX	lgt__S[c] + h2o[c] -> h[c] + gthrd[c] + lac__D[c]	ECOLC_RS18540	Hydroxyacylglutathione hydrolase	Methylglyoxal Metabolism	0	0	1000	0
GLYOX3	mthgxl[c] + h2o[c] -> h[c] + lac__D[c]	"	Glyoxalase III	Methylglyoxal Metabolism	0	0	1000	0
GLYt4pp	na1[p] + gly[p] -> gly[c] + na1[c]	ECOLC_RS19585	Glycine transport in via sodium symport (periplasm)	Transport Inner Membrane	0	0	1000	0
GLYtex	gly[e] <=> gly[p]	ECOLC_RS17950 or ECOLC_RS14330 or ECOLC_RS12200 or ECOLC_RS07685	Glycine transport via diffusion (extracellular to periplasm)	Transport Outer Membrane Porin	1	-1000	1000	0
GLYTRS	gly[c] + atp[c] + trnagly[c] -> ppi[c] + amp[c] + glytrna[c]	ECOLC_RS00810 and ECOLC_RS00805	Glycyl-tRNA synthetase	tRNA Charging	0	0	1000	0
GMAND	gdpmann[c] -> h2o[c] + gdpddman[c]	ECOLC_RS08495	GDP-D-mannose dehydratase	Cell Envelope Biosynthesis	0	0	1000	0
GMHEPAT	h[c] + atp[c] + gmhep1p[c] -> ppi[c] + adphep_DD[c]	ECOLC_RS03430	D-glycero-D-manno-hepose 1-phosphate adenyltransferase	Lipopolysaccharide Biosynthesis / Recycling	0	0	1000	0
GMHEPK	atp[c] + gmhep7p[c] -> h[c] + adp[c] + gmhep17bp[c]	ECOLC_RS03430	D-glycero-D-manno-heptose 7-phosphate kinase	Lipopolysaccharide Biosynthesis / Recycling	0	0	1000	0
GMHEPPA	h2o[c] + gmhep17bp[c] -> pi[c] + gmhep1p[c]	ECOLC_RS18600	D-glycero-D-manno-heptose 1,7-bisphosphate phosphatase	Lipopolysaccharide Biosynthesis / Recycling	0	0	1000	0
GMPR	2 h[c] + gmp[c] + nadph[c] -> imp[c] + nh4[c] + nadp[c]	ECOLC_RS19085	GMP reductase	Purine and Pyrimidine Biosynthesis	0	0	1000	0
GMPS	nh4[c] + atp[c] + xmp[c] -> 2 h[c] + ppi[c] + gmp[c] + amp[c]	"	GMP synthase	Purine and Pyrimidine Biosynthesis	0	0	1000	0
GMPS2	atp[c] + gln__L[c] + xmp[c] + h2o[c] -> 2 h[c] + ppi[c] + glu__L[c] + gmp[c] + amp[c]	ECOLC_RS06285	GMP synthase	Purine and Pyrimidine Biosynthesis	0	0	1000	0
GMPtex	gmp[e] <=> gmp[p]	ECOLC_RS12200 or ECOLC_RS07685 or ECOLC_RS17950 or ECOLC_RS14330	GMP transport via diffusion (extracellular to periplasm)	Transport Outer Membrane Porin	1	-1000	1000	0
GND	6pgc[c] + nadp[c] -> ru5p__D[c] + nadph[c] + co2[c]	ECOLC_RS08625	Phosphogluconate dehydrogenase	Pentose Phosphate Pathway	0	0	1000	0
GNK	atp[c] + glcn[c] -> h[c] + adp[c] + 6pgc[c]	deleted or ECOLC_RS01480	Gluconokinase	Alternate Carbon Metabolism	0	0	1000	0
GNP	6pgc[c] + h2o[c] -> pi[c] + glcn[c]	ECOLC_RS23105	Phosphogluconate phosphatase	Alternate Carbon Metabolism	0	0	1000	0
GOFUCR	h[c] + gdpofuc[c] + nadph[c] -> nadp[c] + gdpfuc[c]	ECOLC_RS08500	GDP-4-oxo-L-fucose reductase	Cell Envelope Biosynthesis	0	0	1000	0
GP4GH	gp4g[c] + h2o[c] -> 2 h[c] + 2 gdp[c]	ECOLC_RS19355	Gp4G hydrolase	Nucleotide Salvage Pathway	0	0	1000	0
GPDDA1	g3pc[c] + h2o[c] -> h[c] + glyc3p[c] + chol[c]	ECOLC_RS01425	Glycerophosphodiester phosphodiesterase (Glycerophosphocholine)	Glycerophospholipid Metabolism	0	0	1000	0
GPDDA1pp	h2o[p] + g3pc[p] -> h[p] + chol[p] + glyc3p[p]	ECOLC_RS07560	Glycerophosphodiester phosphodiesterase (Glycerophosphocholine)	Glycerophospholipid Metabolism	0	0	1000	0
GPDDA2	g3pe[c] + h2o[c] -> h[c] + glyc3p[c] + etha[c]	ECOLC_RS01425	Glycerophosphodiester phosphodiesterase (Glycerophosphoethanolamine)	Glycerophospholipid Metabolism	0	0	1000	0
GPDDA2pp	h2o[p] + g3pe[p] -> h[p] + glyc3p[p] + etha[p]	ECOLC_RS07560	Glycerophosphodiester phosphodiesterase (Glycerophosphoethanolamine)	Glycerophospholipid Metabolism	0	0	1000	0
GPDDA3	g3ps[c] + h2o[c] -> h[c] + glyc3p[c] + ser__L[c]	ECOLC_RS01425	Glycerophosphodiester phosphodiesterase (Glycerophosphoserine)	Glycerophospholipid Metabolism	0	0	1000	0
GPDDA3pp	h2o[p] + g3ps[p] -> h[p] + ser__L[p] + glyc3p[p]	ECOLC_RS07560	Glycerophosphodiester phosphodiesterase (Glycerophosphoserine)	Glycerophospholipid Metabolism	0	0	1000	0
GPDDA4	g3pg[c] + h2o[c] -> h[c] + glyc3p[c] + glyc[c]	ECOLC_RS01425	Glycerophosphodiester phosphodiesterase (Glycerophosphoglycerol)	Glycerophospholipid Metabolism	0	0	1000	0
GPDDA4pp	h2o[p] + g3pg[p] -> h[p] + glyc[p] + glyc3p[p]	ECOLC_RS07560	Glycerophosphodiester phosphodiesterase (Glycerophosphoglycerol)	Glycerophospholipid Metabolism	0	0	1000	0
GPDDA5	h2o[c] + g3pi[c] -> h[c] + glyc3p[c] + inost[c]	ECOLC_RS01425	Glycerophosphodiester phosphodiesterase (Glycerophosphoinositol)	Glycerophospholipid Metabolism	0	0	1000	0
GPDDA5pp	h2o[p] + g3pi[p] -> h[p] + inost[p] + glyc3p[p]	ECOLC_RS07560	Glycerophosphodiester phosphodiesterase (Glycerophosphoinositol)	Glycerophospholipid Metabolism	0	0	1000	0
GRTT	grdp[c] + ipdp[c] -> ppi[c] + frdp[c]	ECOLC_RS17260	Geranyltranstransferase	Cofactor and Prosthetic Group Biosynthesis	0	0	1000	0
GRXR	2 gthrd[c] + grxox[c] -> grxrd[c] + gthox[c]	ECOLC_RS13600 or ECOLC_RS00520 or ECOLC_RS10620 or ECOLC_RS14755	Glutaredoxin reductase	Unassigned	0	0	1000	0
GSNK	atp[c] + gsn[c] -> h[c] + adp[c] + gmp[c]	ECOLC_RS16880	Guanosine kinase	Nucleotide Salvage Pathway	0	0	1000	0
GSNt2pp	h[p] + gsn[p] -> h[c] + gsn[c]	ECOLC_RS03990	Guanosine transport in via proton symport (periplasm)	Transport Inner Membrane	0	0	1000	0
GSNtex	gsn[e] <=> gsn[p]	ECOLC_RS17950 or ECOLC_RS14330 or ECOLC_RS12200 or ECOLC_RS07685	Guanosine transport via diffusion (extracellular to periplasm)	Transport Outer Membrane Porin	1	-1000	1000	0
GSPMDA	gtspmd[c] + h2o[c] -> gthrd[c] + spmd[c]	ECOLC_RS03750	Glutathionylspermidine amidase	Arginine and Proline Metabolism	0	0	1000	0
GSPMDS	gthrd[c] + atp[c] + spmd[c] -> h[c] + adp[c] + pi[c] + gtspmd[c]	ECOLC_RS03750	Glutathionylspermidine synthetase	Arginine and Proline Metabolism	0	0	1000	0
GTHOr	h[c] + nadph[c] + gthox[c] <=> 2 gthrd[c] + nadp[c]	ECOLC_RS01145	Glutathione oxidoreductase	Cofactor and Prosthetic Group Biosynthesis	1	-1000	1000	0
GTHOXtex	gthox[e] <=> gthox[p]	ECOLC_RS17950 or ECOLC_RS14330 or ECOLC_RS12200 or ECOLC_RS07685	Glutathione (ox) transport via diffusion (extracellular to periplasm)	Transport Outer Membrane Porin	1	-1000	1000	0
GTHPi	2 gthrd[c] + h2o2[c] -> 2 h2o[c] + gthox[c]	ECOLC_RS10325	Glutathione peridoxase	Unassigned	0	0	1000	0
GTHRDabc2pp	gthrd[c] + atp[c] + h2o[c] -> h[c] + adp[c] + pi[c] + gthrd[p]	ECOLC_RS14550 and ECOLC_RS14545	Glutathione export via ABC system (cytoplasm to periplasm)	Transport Inner Membrane	0	0	1000	0
GTHRDabcpp	atp[c] + h2o[c] + gthrd[p] -> h[c] + gthrd[c] + adp[c] + pi[c]	ECOLC_RS15100 and ECOLC_RS15095 and ECOLC_RS15090 and ECOLC_RS15085	Reduced glutathione via ABC system (periplasm)	Transport Inner Membrane	0	0	1000	0
GTHRDHpp	h2o[p] + gthrd[p] -> cgly[p] + glu__L[p]	ECOLC_RS01435	Glutathione hydralase (periplasmic)	Cofactor and Prosthetic Group Biosynthesis	0	0	1000	0
GTHRDtex	gthrd[e] <=> gthrd[p]	ECOLC_RS17950 or ECOLC_RS14330 or ECOLC_RS12200 or ECOLC_RS07685	Glutathione transport via diffusion (extracellular to periplasm)	Transport Outer Membrane Porin	1	-1000	1000	0
GTHS	atp[c] + gly[c] + glucys[c] -> h[c] + gthrd[c] + adp[c] + pi[c]	ECOLC_RS04080	Glutathione synthetase	Cofactor and Prosthetic Group Biosynthesis	0	0	1000	0
GTPCI	h2o[c] + gtp[c] -> h[c] + ahdt[c] + for[c]	ECOLC_RS08005	GTP cyclohydrolase I	Cofactor and Prosthetic Group Biosynthesis	0	0	1000	0
GTPCII2	3 h2o[c] + gtp[c] -> 2 h[c] + ppi[c] + for[c] + 25drapp[c]	ECOLC_RS12580	GTP cyclohydrolase II (25drapp)	Cofactor and Prosthetic Group Biosynthesis	0	0	1000	0
GTPDPDP	gdptp[c] + h2o[c] -> h[c] + pi[c] + ppgpp[c]	ECOLC_RS22800	Guanosine-5-triphosphate,3-diphosphate diphosphatase	Cofactor and Prosthetic Group Biosynthesis	0	0	1000	0
GTPDPK	atp[c] + gtp[c] -> h[c] + gdptp[c] + amp[c]	ECOLC_RS04965	GTP diphosphokinase	Cofactor and Prosthetic Group Biosynthesis	0	0	1000	0
GTPHs	h[c] + h2o[c] + gtp[c] -> xtp[c] + nh4[c]	s0001	GTP amine hydrolysis (spontaneous)	Nucleotide Salvage Pathway	0	0	1000	0
GTPtex	gtp[e] <=> gtp[p]	ECOLC_RS17950 or ECOLC_RS14330 or ECOLC_RS12200 or ECOLC_RS07685	GTP transport via diffusion (extracellular to periplasm)	Transport Outer Membrane Porin	1	-1000	1000	0
GUACYC	gtp[c] -> ppi[c] + 35cgmp[c]	"	Guanylate cyclase	Nucleotide Salvage Pathway	0	0	1000	0
GUAD	h[c] + gua[c] + h2o[c] -> xan[c] + nh4[c]	ECOLC_RS04395	Guanine deaminase	Nucleotide Salvage Pathway	0	0	1000	0
GUAPRT	gua[c] + prpp[c] -> ppi[c] + gmp[c]	ECOLC_RS17965 or ECOLC_RS18980	Guanine phosphoribosyltransferase	Nucleotide Salvage Pathway	0	0	1000	0
GUAt2pp	h[p] + gua[p] -> h[c] + gua[c]	ECOLC_RS00315	Guanine transport in via proton symport (periplasm)	Transport Inner Membrane	0	0	1000	0
GUAtex	gua[e] <=> gua[p]	ECOLC_RS17310	Guanine transport via diffusion (extracellular to periplasm)	Transport Outer Membrane	1	-1000	1000	0
GUAtpp	gua[p] <=> gua[c]	"	Guanine transport via diffusion (periplasm)	Transport Inner Membrane	1	-1000	1000	0
GUI1	glcur[c] <=> fruur[c]	ECOLC_RS03220	Glucuronate isomerase (D-glucuronate)	Alternate Carbon Metabolism	1	-1000	1000	0
GUI2	galur[c] <=> tagur[c]	ECOLC_RS03220	Glucuronate isomerase (D-galacturonate)	Alternate Carbon Metabolism	1	-1000	1000	0
GULNLtex	guln__L[e] <=> guln__L[p]	"	L-gulonate transport	Transport	1	-1000	1000	0
GUR1PPpp	h2o[p] + glcur1p[p] -> glcur[p] + pi[p]	"	Glucuronate 1-phosphate phosphatase (periplasm)	Alternate Carbon Metabolism	0	0	1000	0
H2O2tex	h2o2[e] <=> h2o2[p]	ECOLC_RS17950 or ECOLC_RS14330 or ECOLC_RS12200 or ECOLC_RS07685	Hydrogen peroxide transport via diffusion (external)	Transport Outer Membrane Porin	1	-1000	1000	0
H2Otex	h2o[e] <=> h2o[p]	s0001 or ECOLC_RS14190 or deleted or ECOLC_RS07685 or ECOLC_RS17950 or ECOLC_RS12355 or ECOLC_RS12200 or ECOLC_RS14330	H2O transport via diffusion (extracellular to periplasm)	Transport Outer Membrane Porin	1	-1000	1000	0
H2Otpp	h2o[p] <=> h2o[c]	s0001 or ECOLC_RS14620	H2O transport via diffusion (periplasm)	Transport Inner Membrane	1	-1000	1000	0
H2SO	2 o2[c] + h2s[c] -> 2 h[c] + so4[c]	"	Hydrogen sulfide oxidation	Inorganic Ion Transport and Metabolism	0	0	1000	0
H2St1pp	h2s[c] -> h2s[p]	s0001	H2s transport (periplasm)	Transport Inner Membrane	0	0	1000	0
H2Stex	h2s[e] <=> h2s[p]	ECOLC_RS17950 or ECOLC_RS14330 or ECOLC_RS12200 or ECOLC_RS07685	H2s transport via diffusion (extracellular to periplasm)	Transport Outer Membrane Porin	1	-1000	1000	0
H2tex	h2[e] <=> h2[p]	ECOLC_RS17950 or ECOLC_RS14330 or ECOLC_RS12200 or ECOLC_RS07685	Hydrogen transport via diffusion (extracellular to periplasm)	Transport Outer Membrane Porin	1	-1000	1000	0
H2tpp	h2[p] <=> h2[c]	s0001	Hydrogen transport diffusion (periplasm)	Transport Inner Membrane	1	-1000	1000	0
HACD1	h[c] + aacoa[c] + nadh[c] <=> nad[c] + 3hbcoa[c]	ECOLC_RS22465 or ECOLC_RS07060	3-hydroxyacyl-CoA dehydrogenase (acetoacetyl-CoA)	Membrane Lipid Metabolism	1	-1000	1000	0
HACD2	h[c] + 3ohcoa[c] + nadh[c] <=> nad[c] + 3hhcoa[c]	ECOLC_RS22465 or ECOLC_RS07060	3-hydroxyacyl-CoA dehydrogenase (3-oxohexanoyl-CoA)	Membrane Lipid Metabolism	1	-1000	1000	0
HACD3	h[c] + 3oocoa[c] + nadh[c] <=> nad[c] + 3hocoa[c]	ECOLC_RS22465 or ECOLC_RS07060	3-hydroxyacyl-CoA dehydrogenase (3-oxooctanoyl-CoA)	Membrane Lipid Metabolism	1	-1000	1000	0
HACD4	h[c] + 3odcoa[c] + nadh[c] <=> nad[c] + 3hdcoa[c]	ECOLC_RS22465 or ECOLC_RS07060	3-hydroxyacyl-CoA dehydrogenase (3-oxodecanoyl-CoA)	Membrane Lipid Metabolism	1	-1000	1000	0
HACD5	h[c] + 3oddcoa[c] + nadh[c] <=> nad[c] + 3hddcoa[c]	ECOLC_RS22465 or ECOLC_RS07060	3-hydroxyacyl-CoA dehydrogenase (3-oxododecanoyl-CoA)	Membrane Lipid Metabolism	1	-1000	1000	0
HACD6	h[c] + 3otdcoa[c] + nadh[c] <=> nad[c] + 3htdcoa[c]	ECOLC_RS22465 or ECOLC_RS07060	3-hydroxyacyl-CoA dehydrogenase (3-oxotetradecanoyl-CoA)	Membrane Lipid Metabolism	1	-1000	1000	0
HACD7	h[c] + 3ohdcoa[c] + nadh[c] <=> nad[c] + 3hhdcoa[c]	ECOLC_RS22465 or ECOLC_RS07060	3-hydroxyacyl-CoA dehydrogenase (3-oxohexadecanoyl-CoA)	Membrane Lipid Metabolism	1	-1000	1000	0
HACD8	h[c] + 3ohodcoa[c] + nadh[c] <=> 3hodcoa[c] + nad[c]	ECOLC_RS22465 or ECOLC_RS07060	3-hydroxyacyl-CoA dehydrogenase (3-oxooctadecanoyl-CoA), peroxisomal	Membrane Lipid Metabolism	1	-1000	1000	0
HADPCOADH3	nad[c] + 3hadpcoa[c] <=> h[c] + oxadpcoa[c] + nadh[c]	ECOLC_RS12105	3-hydroxyadipyl-CoA dehydrogenase (NAD+)	Alternate Carbon Metabolism	1	-1000	1000	0
HBZOPT	4hbz[c] + octdp[c] -> ppi[c] + 3ophb[c]	ECOLC_RS21435	Hydroxybenzoate octaprenyltransferase	Cofactor and Prosthetic Group Biosynthesis	0	0	1000	0
HCINNMt2rpp	h[p] + 3hcinnm[p] <=> h[c] + 3hcinnm[c]	ECOLC_RS17580	3-hydroxycinnamic acid transport via proton symport, reversible (periplasm)	Transport Inner Membrane	1	-1000	1000	0
HCINNMtex	3hcinnm[e] <=> 3hcinnm[p]	ECOLC_RS17950 or ECOLC_RS14330 or ECOLC_RS12200 or ECOLC_RS07685	3-hydroxycinnamic acid transport via diffusion (extracellular to periplasm)	Transport Outer Membrane Porin	1	-1000	1000	0
HCO3E	h2o[c] + co2[c] <=> h[c] + hco3[c]	ECOLC_RS18975 or ECOLC_RS17650	HCO3 equilibration reaction	Unassigned	1	-1000	1000	0
HDCAt2pp	h[p] + hdca[p] -> h[c] + hdca[c]	"	Hexadecanoate transport via proton symport	Transport	0	0	1000	0
HDCAtexi	hdca[e] -> hdca[p]	ECOLC_RS07045	Hexadecanoate transport via facilitated irreversible diffusion (extracellular to periplasm)	Transport Outer Membrane	0	0	1000	0
HDCEAtexi	hdcea[e] -> hdcea[p]	ECOLC_RS07045	Hexadecenoate transport via facilitated irreversible diffusion (extracellular to periplasm)	Transport Outer Membrane	0	0	1000	0
HEMEOS	frdp[c] + h2o[c] + pheme[c] -> ppi[c] + hemeO[c]	ECOLC_RS17225	Heme O synthase	Cofactor and Prosthetic Group Biosynthesis	0	0	1000	0
HEPK1	hhlipa[c] + atp[c] -> h[c] + phhlipa[c] + adp[c]	ECOLC_RS00435	LPS heptose kinase I (LPS core synthesis)	Lipopolysaccharide Biosynthesis / Recycling	0	0	1000	0
HEPK2	hphhlipa[c] + atp[c] -> h[c] + phphhlipa[c] + adp[c]	ECOLC_RS00450	LPS heptose kinase II (LPS core synthesis)	Lipopolysaccharide Biosynthesis / Recycling	0	0	1000	0
HEPKA2	atp[c] + hphhlipa[c] -> adp[c] + h[c] + icolipaAR1[c]	ECOLC_RS00450	LPS heptose kinase II LPS core synthesis	S_Lipopolysaccharide_Biosynthesis___Recycling	0	0	1000	0
HEPKB2	atp[c] + hphhlipaB[c] -> adp[c] + h[c] + icolipaBR1[c]	ECOLC_RS00450	LPS heptose kinase II LPS core synthesis	S_Lipopolysaccharide_Biosynthesis___Recycling	0	0	1000	0
HEPT1	adphep_LD[c] + lipa[c] -> h[c] + hlipa[c] + adp[c]	ECOLC_RS00470	Heptosyltransferase I (LPS core synthesis)	Lipopolysaccharide Biosynthesis / Recycling	0	0	1000	0
HEPT2	adphep_LD[c] + hlipa[c] -> h[c] + adp[c] + hhlipa[c]	ECOLC_RS00475	Heptosyltransferase II (LPS core synthesis)	Lipopolysaccharide Biosynthesis / Recycling	0	0	1000	0
HEPT3	adphep_LD[c] + phhlipa[c] -> h[c] + hphhlipa[c] + adp[c]	ECOLC_RS00425	Heptosyltransferase III (LPS core synthesis)	Lipopolysaccharide Biosynthesis / Recycling	0	0	1000	0
HEPT4	adphep_LD[c] + gggagicolipa[c] -> h[c] + adp[c] + colipa[c]	"	Heptosyltransferase IV (LPS core synthesis)	Lipopolysaccharide Biosynthesis / Recycling	0	0	1000	0
HETZK	atp[c] + 4mhetz[c] -> h[c] + adp[c] + 4mpetz[c]	ECOLC_RS08260	Hydroxyethylthiazole kinase	Cofactor and Prosthetic Group Biosynthesis	0	0	1000	0
HEX1	atp[c] + glc__D[c] -> h[c] + adp[c] + g6p[c]	ECOLC_RS06895	Hexokinase (D-glucose:ATP)	Glycolysis/Gluconeogenesis	0	0	1000	0
HEX4	atp[c] + man[c] -> h[c] + adp[c] + man6p[c]	"	Hexokinase (D-mannose:ATP)	Alternate Carbon Metabolism	0	0	1000	0
HEX7	fru[c] + atp[c] -> h[c] + adp[c] + f6p[c]	ECOLC_RS17395	Hexokinase (D-fructose:ATP)	Alternate Carbon Metabolism	0	0	1000	0
HEXt2rpp	h[p] + hxa[p] <=> h[c] + hxa[c]	ECOLC_RS07640	Hexanoate transport via proton symport, reversible (periplasm)	Transport Inner Membrane	1	-1000	1000	0
HG2abcpp	hg2[c] + atp[c] + h2o[c] -> h[c] + adp[c] + pi[c] + hg2[p]	ECOLC_RS01315	Mercury (Hg+2) ABC transporter (periplasm)	Inorganic Ion Transport and Metabolism	0	0	1000	0
HG2t3pp	h[p] + hg2[c] -> h[c] + hg2[p]	ECOLC_RS22105	Mercury (Hg+2) transport out via proton antiport (periplasm)	Inorganic Ion Transport and Metabolism	0	0	1000	0
HG2tex	hg2[e] <=> hg2[p]	ECOLC_RS17950 or ECOLC_RS14330 or ECOLC_RS12200 or ECOLC_RS07685	Mercury (Hg+2) transport via diffusion (extracellular to periplasm)	Transport Outer Membrane Porin	1	-1000	1000	0
HHDDI	2hh24dd[c] <=> 2ohed[c]	"	2-hydroxyhepta-2,4-diene-1,7-dioate isomerase	Exchange	1	-1000	1000	0
HISabcpp	his__L[p] + atp[c] + h2o[c] -> h[c] + adp[c] + pi[c] + his__L[c]	ECOLC_RS07215 and ECOLC_RS07225 and ECOLC_RS07230 and ECOLC_RS07220	L-histidine transport via ABC system (periplasm)	Transport Inner Membrane	0	0	1000	0
HISt2rpp	h[p] + his__L[p] <=> h[c] + his__L[c]	ECOLC_RS19045	L-histidine reversible transport via proton symport (periplasm)	Transport Inner Membrane	1	-1000	1000	0
HISTD	2 nad[c] + h2o[c] + histd[c] -> 3 h[c] + his__L[c] + 2 nadh[c]	ECOLC_RS08670	Histidinol dehydrogenase	Histidine Metabolism	0	0	1000	0
HIStex	his__L[e] <=> his__L[p]	ECOLC_RS17950 or ECOLC_RS14330 or ECOLC_RS12200 or ECOLC_RS07685	L-histidine transport via diffusion (extracellular to periplasm)	Transport Outer Membrane Porin	1	-1000	1000	0
HISTP	hisp[c] + h2o[c] -> pi[c] + histd[c]	ECOLC_RS08660	Histidinol-phosphatase	Histidine Metabolism	0	0	1000	0
HISTRS	his__L[c] + atp[c] + trnahis[c] -> ppi[c] + amp[c] + histrna[c]	ECOLC_RS06250	Histidyl-tRNA synthetase	tRNA Charging	0	0	1000	0
HKNDDH	h2o[c] + hkndd[c] -> h[c] + succ[c] + op4en[c]	ECOLC_RS17600	2-hydroxy-6-ketonona-2,4-dienedioic acid hydrolase	Alternate Carbon Metabolism	0	0	1000	0
HKNTDH	hkntd[c] + h2o[c] -> h[c] + fum[c] + op4en[c]	ECOLC_RS17600	2-hydroxy-6-ketononotrienedioate hydrolase	Alternate Carbon Metabolism	0	0	1000	0
HMBS	h2o[c] + 4 ppbng[c] -> 4 nh4[c] + hmbil[c]	ECOLC_RS22660	Hydroxymethylbilane synthase	Cofactor and Prosthetic Group Biosynthesis	0	0	1000	0
HMPK1	atp[c] + 4ahmmp[c] -> h[c] + adp[c] + 4ampm[c]	ECOLC_RS08265 or ECOLC_RS06755	Hydroxymethylpyrimidine kinase (ATP)	Cofactor and Prosthetic Group Biosynthesis	0	0	1000	0
HOMt2pp	h[p] + hom__L[c] -> h[c] + hom__L[p]	ECOLC_RS15185 or ECOLC_RS22565	L-homoserineserine efflux via proton symport	Transport Inner Membrane	0	0	1000	0
HOMtex	hom__L[e] <=> hom__L[p]	ECOLC_RS17950 or ECOLC_RS14330 or ECOLC_RS12200 or ECOLC_RS07685	L-homoserine transport via diffusion (extracellular to periplasm)	Transport Outer Membrane Porin	1	-1000	1000	0
HOPNTAL	4h2opntn[c] -> pyr[c] + acald[c]	ECOLC_RS17585	4-hydroxy-2-oxopentanoate aldolase	Alternate Carbon Metabolism	0	0	1000	0
HPA3MO	nadh[c] + h[c] + o2[c] + 4hphac[c] -> h2o[c] + nad[c] + 34dhpha[c]	"	4 hydroxyphenylacetate 3 monooxygenase nadh	4 hydroxyphenylacetate catabolism	0	0	1000	0
HPACOAT	34dphacoa[c] + h2o[c] -> h[c] + 34dhpha[c] + coa[c]	"	Hydroxyphenylacetyl-CoA thioesterase	Alternate Carbon Metabolism	0	0	1000	0
HPAtex	4hphac[e] <=> 4hphac[p]	"	4-hydroxyphenylacetate transport via diffusion (extracellular to periplasm)	Transport Outer Membrane	1	-1000	1000	0
HPPK2	atp[c] + 6hmhpt[c] -> h[c] + 6hmhptpp[c] + amp[c]	ECOLC_RS18895	6-hydroxymethyl-dihydropterin pyrophosphokinase	Cofactor and Prosthetic Group Biosynthesis	0	0	1000	0
HPPPNDO	dhpppn[c] + o2[c] -> h[c] + hkndd[c]	ECOLC_RS17605	2,3-dihydroxypheylpropionate 1,2-dioxygenase	Alternate Carbon Metabolism	0	0	1000	0
HPPPNt2rpp	h[p] + 3hpppn[p] <=> h[c] + 3hpppn[c]	ECOLC_RS17580	3-(3-hydroxyphenyl)propionate transport via proton symport, reversible (periplasm)	Transport Inner Membrane	1	-1000	1000	0
HPPPNtex	3hpppn[e] <=> 3hpppn[p]	ECOLC_RS14330 or ECOLC_RS12200 or ECOLC_RS07685 or ECOLC_RS17950	3-(3-hydroxyphenyl)propionate transport via diffusion (extracellular to periplasm)	Transport Outer Membrane Porin	1	-1000	1000	0
HPYRI	hpyr[c] <=> 2h3oppan[c]	ECOLC_RS16755	Hydroxypyruvate isomerase	Alternate Carbon Metabolism	1	-1000	1000	0
HPYRP	h2o[c] + 3php[c] -> pi[c] + hpyr[c]	"	3-phosphohydroxypyruvate phosphatase	Alternate Carbon Metabolism	0	0	1000	0
HPYRRx	h[c] + hpyr[c] + nadh[c] -> nad[c] + glyc__R[c]	ECOLC_RS13770 or ECOLC_RS00845	Hydroxypyruvate reductase (NADH)	Alternate Carbon Metabolism	0	0	1000	0
HPYRRy	h[c] + hpyr[c] + nadph[c] -> nadp[c] + glyc__R[c]	ECOLC_RS13770 or ECOLC_RS00845	Hydroxypyruvate reductase (NADPH)	Alternate Carbon Metabolism	0	0	1000	0
HSDy	hom__L[c] + nadp[c] <=> h[c] + aspsa[c] + nadph[c]	ECOLC_RS21955 or ECOLC_RS19615	Homoserine dehydrogenase (NADPH)	Threonine and Lysine Metabolism	1	-1000	1000	0
HSK	hom__L[c] + atp[c] -> h[c] + adp[c] + phom[c]	ECOLC_RS19610	Homoserine kinase	Threonine and Lysine Metabolism	0	0	1000	0
HSST	hom__L[c] + succoa[c] -> suchms[c] + coa[c]	ECOLC_RS21590	Homoserine O-succinyltransferase	Methionine Metabolism	0	0	1000	0
HSTPT	glu__L[c] + imacp[c] -> akg[c] + hisp[c]	ECOLC_RS08665	Histidinol-phosphate transaminase	Histidine Metabolism	0	0	1000	0
Htex	h[e] <=> h[p]	ECOLC_RS14330 or ECOLC_RS12200 or ECOLC_RS07685 or ECOLC_RS17950	Proton transport via diffusion (extracellular to periplasm)	Transport Outer Membrane Porin	1	-1000	1000	0
HXAND	nad[c] + h2o[c] + hxan[c] -> h[c] + xan[c] + nadh[c]	ECOLC_RS04480 and ECOLC_RS04475 and ECOLC_RS04470	Hypoxanthine dehydrogenase	Nucleotide Salvage Pathway	0	0	1000	0
HXAtex	hxa[e] <=> hxa[p]	ECOLC_RS07685 or ECOLC_RS17950 or ECOLC_RS14330 or ECOLC_RS12200	Hexanoate transport via diffusion (extracellular to periplasm)	Transport Outer Membrane Porin	1	-1000	1000	0
HXCT	accoa[c] + hxa[c] -> ac[c] + hxcoa[c]	ECOLC_RS07650 and ECOLC_RS07645	Acetyl-CoA:hexanoate-CoA transferase	Alternate Carbon Metabolism	0	0	1000	0
HXPRT	prpp[c] + hxan[c] -> imp[c] + ppi[c]	ECOLC_RS17965 or ECOLC_RS18980	Hypoxanthine phosphoribosyltransferase (Hypoxanthine)	Nucleotide Salvage Pathway	0	0	1000	0
HYD1pp	2 h[c] + q8[c] + h2[c] -> 2 h[p] + q8h2[c]	(ECOLC_RS14105 and deleted and ECOLC_RS14080) or (ECOLC_RS03720 and ECOLC_RS03715 and ECOLC_RS03710 and ECOLC_RS03705) or (ECOLC_RS05295 and ECOLC_RS05290 and ECOLC_RS05285 and ECOLC_RS05280 and ECOLC_RS05275 and ECOLC_RS05270)	Hydrogenase (ubiquinone-8: 2 protons) (periplasm)	Oxidative Phosphorylation	0	0	1000	0
HYD2pp	2 h[c] + mqn8[c] + h2[c] -> 2 h[p] + mql8[c]	(ECOLC_RS14105 and deleted and ECOLC_RS14080) or (ECOLC_RS03720 and ECOLC_RS03715 and ECOLC_RS03710 and ECOLC_RS03705)	Hydrogenase (menaquinone8: 2 protons) (periplasm)	Oxidative Phosphorylation	0	0	1000	0
HYD3pp	2 h[c] + 2dmmq8[c] + h2[c] -> 2 h[p] + 2dmmql8[c]	(ECOLC_RS14105 and deleted and ECOLC_RS14080) or (ECOLC_RS03720 and ECOLC_RS03715 and ECOLC_RS03710 and ECOLC_RS03705)	Hydrogenase (Demethylmenaquinone-8: 2 protons) (periplasm)	Oxidative Phosphorylation	0	0	1000	0
HYPOE	pyam5p[c] + h2o[c] -> pydam[c] + pi[c]	"	Hypothetical enyme	Cofactor and Prosthetic Group Biosynthesis	0	0	1000	0
HYXNtex	hxan[e] <=> hxan[p]	ECOLC_RS17950 or ECOLC_RS14330 or ECOLC_RS12200 or ECOLC_RS07685	Hypoxanthine transport via diffusion (extracellular to periplasm)	Transport Outer Membrane Porin	1	-1000	1000	0
HYXNtpp	hxan[p] <=> hxan[c]	"	Hypoxanthine transport (periplasm)	Transport Inner Membrane	1	-1000	1000	0
I2FE2SR	iscssh[c] + 2fe1s[c] + iscu[c] -> 4 h[c] + iscu_2fe2s[c] + iscs[c]	ECOLC_RS06170 and ECOLC_RS06175	ISC [2Fe-2S] regeneration	Cofactor and Prosthetic Group Biosynthesis	0	0	1000	0
I2FE2SS	2 iscssh[c] + fadh2[c] + 2 fe2[c] + iscu[c] -> 6 h[c] + iscu_2fe2s[c] + 2 iscs[c] + fad[c]	ECOLC_RS22650 and ECOLC_RS06170 and ECOLC_RS06175	ISC [2Fe-2S] Synthesis	Cofactor and Prosthetic Group Biosynthesis	0	0	1000	0
I2FE2SS2	2 iscssh[c] + iscu_2fe2s[c] + fadh2[c] + 2 fe2[c] -> 6 h[c] + iscu_2fe2s2[c] + 2 iscs[c] + fad[c]	ECOLC_RS22650 and ECOLC_RS06170 and ECOLC_RS06175	ISC [2Fe-2S] Synthesis II	Cofactor and Prosthetic Group Biosynthesis	0	0	1000	0
I2FE2ST	4 h[c] + iscu_2fe2s[c] -> 2fe2s[c] + iscu[c]	ECOLC_RS06180 and ECOLC_RS06175	ISC [2Fe-2S] Transfer	Cofactor and Prosthetic Group Biosynthesis	0	0	1000	0
I4FE4SR	2 h[c] + fadh2[c] + iscu_2fe2s2[c] -> iscu_4fe4s[c] + fad[c]	ECOLC_RS06175	ISC [4Fe-4S] Reduction	Cofactor and Prosthetic Group Biosynthesis	0	0	1000	0
I4FE4ST	4 h[c] + iscu_4fe4s[c] -> iscu[c] + 4fe4s[c]	ECOLC_RS06180 and ECOLC_RS06175	ISC [4Fe-4S] Transfer	Cofactor and Prosthetic Group Biosynthesis	0	0	1000	0
ICDHyr	nadp[c] + icit[c] <=> akg[c] + nadph[c] + co2[c]	ECOLC_RS13245	Isocitrate dehydrogenase (NADP)	Citric Acid Cycle	1	-1000	1000	0
ICHORS_copy2	chor[c] -> ichor[c]	ECOLC_RS16420	Isochorismate synthase	Cofactor and Prosthetic Group Biosynthesis	0	0	1000	0
ICHORS_copy1	chor[c] <=> ichor[c]	ECOLC_RS07420	Isochorismate synthase	Cofactor and Prosthetic Group Biosynthesis	1	-1000	1000	0
ICHORT	ichor[c] + h2o[c] -> pyr[c] + 23ddhb[c]	ECOLC_RS16410	Isochorismatase	Cofactor and Prosthetic Group Biosynthesis	0	0	1000	0
ICITtex	icit[e] <=> icit[p]	"	Citrate transport via diffusion extracellular to periplasm	Transport Outer Membrane Porin	1	-1000	1000	0
ICL	icit[c] -> glx[c] + succ[c]	ECOLC_RS21580	Isocitrate lyase	Anaplerotic Reactions	0	0	1000	0
ICYSDS	cys__L[c] + iscs[c] -> iscssh[c] + ala__L[c]	ECOLC_RS06170	ISC Cysteine desulfuration	Cofactor and Prosthetic Group Biosynthesis	0	0	1000	0
IDONt2rpp	h[p] + idon__L[p] <=> h[c] + idon__L[c]	"	L-idonate transport via proton symport, reversible (periplasm)	Transport	1	-1000	1000	0
IDONtex	idon__L[e] <=> idon__L[p]	ECOLC_RS17950 or ECOLC_RS14330 or ECOLC_RS12200 or ECOLC_RS07685	L-idonate transport via diffusion (extracellular to periplasm)	Transport Outer Membrane Porin	1	-1000	1000	0
IG3PS	gln__L[c] + prlp[c] -> h[c] + aicar[c] + eig3p[c] + glu__L[c]	ECOLC_RS08655 and ECOLC_RS08645	Imidazole-glycerol-3-phosphate synthase	Histidine Metabolism	0	0	1000	0
IGPDH	eig3p[c] -> h2o[c] + imacp[c]	ECOLC_RS08660	Imidazoleglycerol-phosphate dehydratase	Histidine Metabolism	0	0	1000	0
IGPS	h[c] + 2cpr5p[c] -> 3ig3p[c] + h2o[c] + co2[c]	ECOLC_RS12675	Indole-3-glycerol-phosphate synthase	Tyrosine Tryptophan and Phenylalanine Metabolism	0	0	1000	0
ILEabcpp	atp[c] + ile__L[p] + h2o[c] -> h[c] + adp[c] + pi[c] + ile__L[c]	ECOLC_RS01395 and ECOLC_RS01390 and ECOLC_RS01380 and ECOLC_RS01360 and ECOLC_RS01385	L-isoleucine transport via ABC system (periplasm)	Transport Inner Membrane	0	0	1000	0
ILEt2rpp	h[p] + ile__L[p] -> h[c] + ile__L[c]	ECOLC_RS17365	L-isoleucine reversible transport via proton symport (periplasm)	Transport Inner Membrane	0	0	1000	0
ILETA	akg[c] + ile__L[c] <=> glu__L[c] + 3mop[c]	ECOLC_RS22840	Isoleucine transaminase	Valine Leucine and Isoleucine Metabolism	1	-1000	1000	0
ILEtex	ile__L[e] <=> ile__L[p]	ECOLC_RS17950 or ECOLC_RS14330 or ECOLC_RS12200 or ECOLC_RS07685	L-isoleucine transport via diffusion (extracellular to periplasm)	Transport Outer Membrane Porin	1	-1000	1000	0
ILETRS	ile__L[c] + atp[c] + trnaile[c] -> ppi[c] + amp[c] + iletrna[c]	ECOLC_RS19485	Isoleucyl-tRNA synthetase	tRNA Charging	0	0	1000	0
IMPC	imp[c] + h2o[c] <=> fprica[c]	ECOLC_RS21620	IMP cyclohydrolase	Purine and Pyrimidine Biosynthesis	1	-1000	1000	0
IMPD	nad[c] + imp[c] + h2o[c] -> h[c] + xmp[c] + nadh[c]	ECOLC_RS06280	IMP dehydrogenase	Purine and Pyrimidine Biosynthesis	0	0	1000	0
IMPtex	imp[e] <=> imp[p]	ECOLC_RS17950 or ECOLC_RS14330 or ECOLC_RS12200 or ECOLC_RS07685	IMP transport via diffusion (extracellular to periplasm)	Transport Outer Membrane Porin	1	-1000	1000	0
INDOLEt2pp	h[c] + indole[c] -> h[p] + indole[p]	(ECOLC_RS02355 and ECOLC_RS02350) and ECOLC_RS03520	Indole transport via proton symport, irreversible (periplasm)	Transport	0	0	1000	0
INDOLEt2rpp	h[p] + indole[p] -> h[c] + indole[c]	ECOLC_RS02860	Indole transport via proton symport, reversible (periplasm)	Transport Inner Membrane	0	0	1000	0
INDOLEtex	indole[e] <=> indole[p]	ECOLC_RS17950 or ECOLC_RS14330 or ECOLC_RS12200 or ECOLC_RS07685	Indole transport via diffusion (extracellular to periplasm)	Transport Outer Membrane Porin	1	-1000	1000	0
INOSTO	o2[c] + inost[c] <=> h[c] + glcur[c] + h2o[c]	"	Myo-Inositol:oxygen oxidoreductase	#N/A	1	-1000	1000	0
INSH	ins[c] + h2o[c] -> rib__D[c] + hxan[c]	rihC	Inosine hydrolase	Nucleotide Salvage Pathway	0	0	1000	0
INSK	atp[c] + ins[c] -> h[c] + adp[c] + imp[c]	ECOLC_RS16880	Insosine kinase	Nucleotide Salvage Pathway	0	0	1000	0
INSt2pp	h[p] + ins[p] -> h[c] + ins[c]	ECOLC_RS03990	Inosine transport in via proton symport (periplasm)	Transport Inner Membrane	0	0	1000	0
INStex	ins[e] <=> ins[p]	ECOLC_RS17310	Inosine transport via diffusion (extracellular to periplasm)	Transport Outer Membrane	1	-1000	1000	0
INSTtex	inost[e] <=> inost[p]	ECOLC_RS17950 or ECOLC_RS14330 or ECOLC_RS12200 or ECOLC_RS07685	Inositol transport via diffusion (extracellular to periplasm)	Transport Outer Membrane Porin	1	-1000	1000	0
IPDDI	ipdp[c] <=> dmpp[c]	ECOLC_RS04360	Isopentenyl-diphosphate D-isomerase	Cofactor and Prosthetic Group Biosynthesis	1	-1000	1000	0
IPDPS	h[c] + h2mb4p[c] + nadh[c] -> nad[c] + h2o[c] + ipdp[c]	ECOLC_RS19470	1-hydroxy-2-methyl-2-(E)-butenyl 4-diphosphate reductase (ipdp)	Cofactor and Prosthetic Group Biosynthesis	0	0	1000	0
IPMD	nad[c] + 3c2hmp[c] -> h[c] + 3c4mop[c] + nadh[c]	ECOLC_RS19240	3-isopropylmalate dehydrogenase	Valine Leucine and Isoleucine Metabolism	0	0	1000	0
IPPMIa	3c2hmp[c] <=> h2o[c] + 2ippm[c]	ECOLC_RS19250 and ECOLC_RS19245	3-isopropylmalate dehydratase	Valine Leucine and Isoleucine Metabolism	1	-1000	1000	0
IPPMIb	h2o[c] + 2ippm[c] <=> 3c3hmp[c]	ECOLC_RS19250 and ECOLC_RS19245	2-isopropylmalate hydratase	Valine Leucine and Isoleucine Metabolism	1	-1000	1000	0
IPPS	accoa[c] + 3mob[c] + h2o[c] -> h[c] + 3c3hmp[c] + coa[c]	ECOLC_RS19235	2-isopropylmalate synthase	Valine Leucine and Isoleucine Metabolism	0	0	1000	0
ISETACabcpp	isetac[p] + atp[c] + h2o[c] -> h[c] + adp[c] + pi[c] + isetac[c]	(ECOLC_RS17535 and ECOLC_RS17530 and ECOLC_RS17525) or (ECOLC_RS14295 and ECOLC_RS14310 and ECOLC_RS14305)	Isethionate transport via ABC system (periplasm)	Transport Inner Membrane	0	0	1000	0
ISETACtex	isetac[e] <=> isetac[p]	ECOLC_RS17950 or ECOLC_RS14330 or ECOLC_RS12200 or ECOLC_RS07685	Isethionate transport via diffusion (extracellular to periplasm)	Transport Outer Membrane Porin	1	-1000	1000	0
K2L4Aabcpp	atp[c] + h2o[c] + kdo2lipid4[c] -> h[c] + adp[c] + pi[c] + kdo2lipid4[p]	ECOLC_RS14410	KDO(2)-lipid IV A transport via ABC system (periplasm)	Transport Inner Membrane	0	0	1000	0
K2L4Aabctex	atp[c] + kdo2lipid4[p] + h2o[c] -> h[c] + adp[c] + pi[c] + kdo2lipid4[e]	ECOLC_RS02660 and ECOLC_RS02655 and ECOLC_RS02665 and ECOLC_RS20180 and ECOLC_RS20175	KDO(2)-lipid IV A transport via ABC system (periplasm to extracellular)	Lipopolysaccharide Biosynthesis / Recycling	0	0	1000	0
Kabcpp	atp[c] + h2o[c] + k[p] -> h[c] + adp[c] + pi[c] + k[c]	(ECOLC_RS15895 and ECOLC_RS15900 and ECOLC_RS15905) or (ECOLC_RS15895 and ECOLC_RS15900 and ECOLC_RS15905 and ECOLC_RS15890)	Potassium ABC transporter (periplasm)	Inorganic Ion Transport and Metabolism	0	0	1000	0
KARA1	23dhmb[c] + nadp[c] <=> h[c] + alac__S[c] + nadph[c]	ECOLC_RS22820	Ketol-acid reductoisomerase (2,3-dihydroxy-3-methylbutanoate)	Valine Leucine and Isoleucine Metabolism	1	-1000	1000	0
KARA2	h[c] + 2ahbut[c] + nadph[c] <=> nadp[c] + 23dhmp[c]	ECOLC_RS22820	Ketol-acid reductoisomerase (2-Acetolactate)	Valine Leucine and Isoleucine Metabolism	1	-1000	1000	0
KAS14	h[c] + acACP[c] + malACP[c] -> actACP[c] + co2[c] + ACP[c]	ECOLC_RS07145 or ECOLC_RS13445	Beta-ketoacyl-ACP synthase	Membrane Lipid Metabolism	0	0	1000	0
KAS15	h[c] + accoa[c] + malACP[c] -> actACP[c] + coa[c] + co2[c]	ECOLC_RS13465	Beta-ketoacyl-ACP synthase (2)	Membrane Lipid Metabolism	0	0	1000	0
KDOCT2	ctp[c] + kdo[c] -> ppi[c] + ckdo[c]	ECOLC_RS14390	3-deoxy-manno-octulosonate cytidylyltransferase	Lipopolysaccharide Biosynthesis / Recycling	0	0	1000	0
KDOPP	h2o[c] + kdo8p[c] -> pi[c] + kdo[c]	ECOLC_RS02670	3-deoxy-manno-octulosonate-8-phosphatase	Lipopolysaccharide Biosynthesis / Recycling	0	0	1000	0
KDOPS	pep[c] + h2o[c] + ara5p[c] -> pi[c] + kdo8p[c]	ECOLC_RS12930	3-deoxy -D-manno-octulosonic -acid 8-phosphate synthase	Lipopolysaccharide Biosynthesis / Recycling	0	0	1000	0
KDUI	dt5hsu[c] -> dkdglcn[c]	"	5-keto-4-deoxyuronate isomerase	Cell Envelope Biosynthesis	0	0	1000	0
KG6PDC	h[c] + 3dhgulnp[c] -> xu5p__L[c] + co2[c]	ECOLC_RS20530 or ECOLC_RS00690	3-keto-L-gulonate 6-phosphate decarboxylase	Alternate Carbon Metabolism	0	0	1000	0
Kt2pp	h[p] + k[p] -> h[c] + k[c]	(ECOLC_RS12500 and ECOLC_RS02230 and ECOLC_RS22450) or ECOLC_RS12735 or (ECOLC_RS12500 and ECOLC_RS02230 and deleted) or ECOLC_RS22945	Potassium transport in via proton symport (periplasm)	Inorganic Ion Transport and Metabolism	0	0	1000	0
Kt3pp	h[p] + k[c] -> h[c] + k[p]	ECOLC_RS12910 or ECOLC_RS15025 or ECOLC_RS01920 or ECOLC_RS19365	Potassium transport out via proton antiport (periplasm)	Inorganic Ion Transport and Metabolism	0	0	1000	0
Ktex	k[e] <=> k[p]	ECOLC_RS17950 or ECOLC_RS14330 or ECOLC_RS12200 or ECOLC_RS07685	Potassium transport via diffusion (extracellular to periplasm)	Transport Outer Membrane Porin	1	-1000	1000	0
L_LACD2	q8[c] + lac__L[c] -> q8h2[c] + pyr[c]	ECOLC_RS00545 or (ECOLC_RS17815 and ECOLC_RS17810 and ECOLC_RS17805)	L-Lactate dehydrogenase (ubiquinone)	Oxidative Phosphorylation	0	0	1000	0
L_LACD3	mqn8[c] + lac__L[c] -> mql8[c] + pyr[c]	ECOLC_RS00545 or (ECOLC_RS17815 and ECOLC_RS17810 and ECOLC_RS17805)	L-Lactate dehydrogenase (menaquinone)	Oxidative Phosphorylation	0	0	1000	0
L_LACt2rpp	h[p] + lac__L[p] <=> h[c] + lac__L[c]	ECOLC_RS00555 or ECOLC_RS03855	L-lactate reversible transport via proton symport (periplasm)	Transport Inner Membrane	1	-1000	1000	0
L_LACtex	lac__L[e] <=> lac__L[p]	"	L-lactate transport via diffusion (extracellular to periplasm)	Transport Outer Membrane Porin	1	-1000	1000	0
LA4NTpp	colipa[p] + uLa4n[p] -> udcpp[p] + acolipa[p]	ECOLC_RS07465	4-amino-4-deoxy-L-arabinotransferase (LPS lipid A modification, periplasmic face of membrane))	Lipopolysaccharide Biosynthesis / Recycling	0	0	1000	0
LACZ	lcts[c] + h2o[c] -> glc__D[c] + gal[c]	ECOLC_RS17625	B-galactosidase	Alternate Carbon Metabolism	0	0	1000	0
LACZpp	h2o[p] + lcts[p] -> gal[p] + glc__D[p]	ECOLC_RS08115	B-galactosidase	Alternate Carbon Metabolism	0	0	1000	0
LADGMDH	h2o[c] + LalaDgluMdap[c] -> 26dap__M[c] + LalaDglu[c]	ECOLC_RS12320	L-alanyl-gamma-D-glutamyl-meso-diaminopimelate hydrolase	Murein Recycling	0	0	1000	0
LALADGLUtex	LalaDglu[e] <=> LalaDglu[p]	ECOLC_RS07685 or ECOLC_RS12200 or ECOLC_RS17950 or ECOLC_RS14330	L-alanyl-D-glutamate transport via diffusion (extracellular to periplasm)	Transport Outer Membrane Porin	1	-1000	1000	0
LALADGLUtpp	h[p] + LalaDglu[p] -> h[c] + LalaDglu[c]	ECOLC_RS10720 or ECOLC_RS01165 or ECOLC_RS20955 or ECOLC_RS15830	L-alanyl-D-glutamate transport in via proton symport (periplasm)	Transport Inner Membrane	0	0	1000	0
LALALGLUtex	LalaLglu[e] <=> LalaLglu[p]	ECOLC_RS07685 or ECOLC_RS12200 or ECOLC_RS17950 or ECOLC_RS14330	L-alanyl-L-glutamate transport via diffusion (extracellular to periplasm)	Transport Outer Membrane Porin	1	-1000	1000	0
LALALGLUtpp	h[p] + LalaLglu[p] -> h[c] + LalaLglu[c]	ECOLC_RS10720 or ECOLC_RS01165 or ECOLC_RS20955 or ECOLC_RS15830	L-alanyl-L-glutamate transport in via proton symport (periplasm)	Transport Inner Membrane	0	0	1000	0
LALDO2x	h[c] + mthgxl[c] + nadh[c] -> nad[c] + lald__D[c]	ECOLC_RS21920	D-Lactaldehyde:NAD+ 1-oxidoreductase	Methylglyoxal Metabolism	0	0	1000	0
LALDO3	h[c] + mthgxl[c] + nadph[c] -> lald__L[c] + nadp[c]	"	L-Lactaldehyde:NADP+ 1-oxidoreductase	Methylglyoxal Metabolism	0	0	1000	0
LALGP	h2o[c] + LalaLglu[c] -> glu__L[c] + ala__L[c]	ECOLC_RS17970	L-alanyl-gamma-L-glutamate peptidase	Murein Recycling	0	0	1000	0
LCADi	nad[c] + lald__L[c] + h2o[c] -> 2 h[c] + lac__L[c] + nadh[c]	ECOLC_RS12015	Lactaldehyde dehydrogenase	Alternate Carbon Metabolism	0	0	1000	0
LCARR	nadh[c] + h[c] + lald__D[c] <=> nad[c] + 12ppd__R[c]	"	Lacaldehyde reductase (R-propane-1,2-diol forming)	Methylglyoxal Metabolism	1	-1000	1000	0
LCARS	h[c] + lald__L[c] + nadh[c] <=> nad[c] + 12ppd__S[c]	ECOLC_RS04885	Lacaldehyde reductase (S-propane-1,2-diol forming)	Alternate Carbon Metabolism	1	-1000	1000	0
LCARSyi	h[c] + lald__L[c] + nadph[c] -> nadp[c] + 12ppd__S[c]	"	Lacaldehyde reductase (S-propane-1,2-diol forming)	Alternate Carbon Metabolism	0	0	1000	0
LCTSt3ipp	lcts[c] + h[p] -> h[c] + lcts[p]	ECOLC_RS07915 or ECOLC_RS19255 or ECOLC_RS11420	Lactose transport via proton aniport (periplasm)	Transport Inner Membrane	0	0	1000	0
LCTStex	lcts[e] <=> lcts[p]	ECOLC_RS17950 or ECOLC_RS14330 or ECOLC_RS12200 or ECOLC_RS07685	Lactose transport via diffusion (extracellular to periplasm)	Transport Outer Membrane Porin	1	-1000	1000	0
LCTStpp	h[p] + lcts[p] -> h[c] + lcts[c]	ECOLC_RS17630	Lactose transport via proton symport (periplasm)	Transport Inner Membrane	0	0	1000	0
LDGUNPD	5pg35pg[c] + h2o[c] -> h[c] + 2 gmp[c]	"	Linear diguanylate phosphodiesterase	Nucleotide Salvage Pathway	0	0	1000	0
LDH_D	nad[c] + lac__D[c] <=> h[c] + pyr[c] + nadh[c]	ECOLC_RS08110 or ECOLC_RS12180	D-lactate dehydrogenase	Pyruvate Metabolism	1	-1000	1000	0
LEUabcpp	atp[c] + h2o[c] + leu__L[p] -> h[c] + adp[c] + pi[c] + leu__L[c]	(ECOLC_RS01395 and ECOLC_RS01390 and ECOLC_RS01380 and ECOLC_RS01360 and ECOLC_RS01385) or (ECOLC_RS01395 and ECOLC_RS01390 and ECOLC_RS01380 and ECOLC_RS01375 and ECOLC_RS01385)	L-leucine transport via ABC system (periplasm)	Transport Inner Membrane	0	0	1000	0
LEUt2rpp	h[p] + leu__L[p] -> h[c] + leu__L[c]	ECOLC_RS17365	L-leucine reversible transport via proton symport (periplasm)	Transport Inner Membrane	0	0	1000	0
LEUt3rpp	leu__L[c] + h[p] <=> h[c] + leu__L[p]	"	L-leucine transport in via sodium symport	Transport	1	-1000	1000	0
LEUTAi	4mop[c] + glu__L[c] -> akg[c] + leu__L[c]	ECOLC_RS22840 or ECOLC_RS21365	Leucine transaminase (irreversible)	Valine Leucine and Isoleucine Metabolism	0	0	1000	0
LEUtex	leu__L[e] <=> leu__L[p]	ECOLC_RS17950 or ECOLC_RS14330 or ECOLC_RS12200 or ECOLC_RS07685	L-leucine transport via diffusion (extracellular to periplasm)	Transport Outer Membrane Porin	1	-1000	1000	0
LEUTRS	leu__L[c] + atp[c] + trnaleu[c] -> ppi[c] + amp[c] + leutrna[c]	ECOLC_RS16170	Leucyl-tRNA synthetase	tRNA Charging	0	0	1000	0
LGTHL	gthrd[c] + mthgxl[c] -> lgt__S[c]	ECOLC_RS10635	Lactoylglutathione lyase	Methylglyoxal Metabolism	0	0	1000	0
LIPAabcpp	lipa[c] + atp[c] + h2o[c] -> h[c] + adp[c] + pi[c] + lipa[p]	ECOLC_RS14410	Lipid A transport via ABC system (periplasm)	Lipopolysaccharide Biosynthesis / Recycling	0	0	1000	0
LIPAabctex	lipa[p] + atp[c] + h2o[c] -> h[c] + adp[c] + pi[c] + lipa[e]	ECOLC_RS02660 and ECOLC_RS02655 and ECOLC_RS02665 and ECOLC_RS20180 and ECOLC_RS20175	Lipid A transport via ABC system (periplasm to extracellular)	Lipopolysaccharide Biosynthesis / Recycling	0	0	1000	0
LIPACabcpp	atp[c] + h2o[c] + lipa_cold[c] -> h[c] + adp[c] + lipa_cold[p] + pi[c]	ECOLC_RS14410	Lipid (cold) A transport via ABC system (periplasm)	Lipopolysaccharide Biosynthesis / Recycling	0	0	1000	0
LIPAHT2ex	h[e] + colipa[e] + hdca[e] -> hacolipa[e] + h2o[e]	ECOLC_RS16270	Core oligosaccharide lipid A:hexadecanoate transferase (n-C16:0) (extracellular membrane)	Lipopolysaccharide Biosynthesis / Recycling	0	0	1000	0
LIPAHTex	h[e] + lipa[e] + hdca[e] -> halipa[e] + h2o[e]	ECOLC_RS16270	Lipid A:hexadecanoate transferase (n-C16:0) (extracellular membrane)	Lipopolysaccharide Biosynthesis / Recycling	0	0	1000	0
LIPAMPL	lipoamp[c] -> lipopb[c] + amp[c]	ECOLC_RS19715	Lipoyl-adenylate protein ligase	Cofactor and Prosthetic Group Biosynthesis	0	0	1000	0
LIPATPT	atp[c] + lipoate[c] -> ppi[c] + lipoamp[c]	ECOLC_RS19715	Lipoate-ATP adenylate transferase	Cofactor and Prosthetic Group Biosynthesis	0	0	1000	0
LIPOCT	h[c] + ocACP[c] -> octapb[c] + ACP[c]	ECOLC_RS16230	Lipoyl(octanoyl) transferase	Cofactor and Prosthetic Group Biosynthesis	0	0	1000	0
LIPOS	h[c] + octapb[c] + nad[c] + 2 amet[c] + 4fe4s[c] -> 2 met__L[c] + 2 dad_5[c] + 2 fe2[c] + lipopb[c] + 2fe2s[c] + nadh[c]	ECOLC_RS16245	Lipoate synthase	Cofactor and Prosthetic Group Biosynthesis	0	0	1000	0
LIPOt2pp	h[p] + lipoate[p] -> h[c] + lipoate[c]	"	Lipoate transport via proton symport (periplasm)	Transport Inner Membrane	0	0	1000	0
LIPOtex	lipoate[e] <=> lipoate[p]	ECOLC_RS12200 or ECOLC_RS07685 or ECOLC_RS14330 or ECOLC_RS17950	Lipoate transport via diffusion (extracellular to periplasm)	Transport Outer Membrane Porin	1	-1000	1000	0
LKDRA	lkdr[c] <=> lald__L[c] + pyr[c]	"	2-keto-3-deoxy-L-rhamnonate aldolase	Alternate Carbon Metabolism	1	-1000	1000	0
LPADSS	u23ga[c] + lipidX[c] -> h[c] + lipidAds[c] + udp[c]	ECOLC_RS18695	Lipid A disaccaride synthase	Lipopolysaccharide Biosynthesis / Recycling	0	0	1000	0
LPLIPAL1A120pp	1ddecg3p[p] + h2o[p] -> h[p] + ddca[p] + glyc3p[p]	ECOLC_RS16795	Lysophospholipase L1 (2-acylglycerophosphotidate, n-C12:0) (periplasm)	Glycerophospholipid Metabolism	0	0	1000	0
LPLIPAL1A140pp	h2o[p] + 1tdecg3p[p] -> h[p] + ttdca[p] + glyc3p[p]	ECOLC_RS16795	Lysophospholipase L1 (2-acylglycerophosphotidate, n-C14:0) (periplasm)	Glycerophospholipid Metabolism	0	0	1000	0
LPLIPAL1A141pp	h2o[p] + 1tdec7eg3p[p] -> h[p] + ttdcea[p] + glyc3p[p]	ECOLC_RS16795	Lysophospholipase L1 (2-acylglycerophosphotidate, n-C14:1) (periplasm)	Glycerophospholipid Metabolism	0	0	1000	0
LPLIPAL1A160pp	h2o[p] + 1hdecg3p[p] -> hdca[p] + h[p] + glyc3p[p]	ECOLC_RS16795	Lysophospholipase L1 (2-acylglycerophosphotidate, n-C16:0) (periplasm)	Glycerophospholipid Metabolism	0	0	1000	0
LPLIPAL1A161pp	h2o[p] + 1hdec9eg3p[p] -> h[p] + glyc3p[p] + hdcea[p]	ECOLC_RS16795	Lysophospholipase L1 (2-acylglycerophosphotidate, n-C16:1) (periplasm)	Glycerophospholipid Metabolism	0	0	1000	0
LPLIPAL1A180pp	1odecg3p[p] + h2o[p] -> h[p] + ocdca[p] + glyc3p[p]	ECOLC_RS16795	Lysophospholipase L1 (2-acylglycerophosphotidate, n-C18:0) (periplasm)	Glycerophospholipid Metabolism	0	0	1000	0
LPLIPAL1A181pp	h2o[p] + 1odec11eg3p[p] -> ocdcea[p] + h[p] + glyc3p[p]	ECOLC_RS16795	Lysophospholipase L1 (2-acylglycerophosphotidate, n-C18:1) (periplasm)	Glycerophospholipid Metabolism	0	0	1000	0
LPLIPAL1E120pp	h2o[p] + 1agpe120[p] -> h[p] + g3pe[p] + ddca[p]	ECOLC_RS16795	Lysophospholipase L1 (2-acylglycerophosphoethanolamine, n-C12:0) (periplasm)	Glycerophospholipid Metabolism	0	0	1000	0
LPLIPAL1E140pp	h2o[p] + 1agpe140[p] -> h[p] + g3pe[p] + ttdca[p]	ECOLC_RS16795	Lysophospholipase L1 (2-acylglycerophosphoethanolamine, n-C14:0) (periplasm)	Glycerophospholipid Metabolism	0	0	1000	0
LPLIPAL1E141pp	h2o[p] + 1agpe141[p] -> h[p] + g3pe[p] + ttdcea[p]	ECOLC_RS16795	Lysophospholipase L1 (2-acylglycerophosphoethanolamine, n-C14:1) (periplasm)	Glycerophospholipid Metabolism	0	0	1000	0
LPLIPAL1E160pp	h2o[p] + 1agpe160[p] -> hdca[p] + h[p] + g3pe[p]	ECOLC_RS16795	Lysophospholipase L1 (2-acylglycerophosphoethanolamine, n-C16:0) (periplasm)	Glycerophospholipid Metabolism	0	0	1000	0
LPLIPAL1E161pp	h2o[p] + 1agpe161[p] -> h[p] + g3pe[p] + hdcea[p]	ECOLC_RS16795	Lysophospholipase L1 (2-acylglycerophosphoethanolamine, n-C16:1) (periplasm)	Glycerophospholipid Metabolism	0	0	1000	0
LPLIPAL1E180pp	h2o[p] + 1agpe180[p] -> h[p] + g3pe[p] + ocdca[p]	ECOLC_RS16795	Lysophospholipase L1 (2-acylglycerophosphoethanolamine, n-C18:0) (periplasm)	Glycerophospholipid Metabolism	0	0	1000	0
LPLIPAL1E181pp	h2o[p] + 1agpe181[p] -> ocdcea[p] + h[p] + g3pe[p]	ECOLC_RS16795	Lysophospholipase L1 (2-acylglycerophosphoethanolamine, n-C18:1) (periplasm)	Glycerophospholipid Metabolism	0	0	1000	0
LPLIPAL1G120pp	h2o[p] + 1agpg120[p] -> h[p] + g3pg[p] + ddca[p]	ECOLC_RS16795	Lysophospholipase L1 (2-acylglycerophosphoglycerol, n-C12:0) (periplasm)	Glycerophospholipid Metabolism	0	0	1000	0
LPLIPAL1G140pp	h2o[p] + 1agpg140[p] -> h[p] + ttdca[p] + g3pg[p]	ECOLC_RS16795	Lysophospholipase L1 (2-acylglycerophosphoglycerol, n-C14:0) (periplasm)	Glycerophospholipid Metabolism	0	0	1000	0
LPLIPAL1G141pp	h2o[p] + 1agpg141[p] -> h[p] + ttdcea[p] + g3pg[p]	ECOLC_RS16795	Lysophospholipase L1 (2-acylglycerophosphoglycerol, n-C14:1) (periplasm)	Glycerophospholipid Metabolism	0	0	1000	0
LPLIPAL1G160pp	h2o[p] + 1agpg160[p] -> hdca[p] + h[p] + g3pg[p]	ECOLC_RS16795	Lysophospholipase L1 (2-acylglycerophosphoglycerol, n-C16:0) (periplasm)	Glycerophospholipid Metabolism	0	0	1000	0
LPLIPAL1G161pp	h2o[p] + 1agpg161[p] -> h[p] + g3pg[p] + hdcea[p]	ECOLC_RS16795	Lysophospholipase L1 (2-acylglycerophosphoglycerol, n-C16:1) (periplasm)	Glycerophospholipid Metabolism	0	0	1000	0
LPLIPAL1G180pp	h2o[p] + 1agpg180[p] -> h[p] + ocdca[p] + g3pg[p]	ECOLC_RS16795	Lysophospholipase L1 (2-acylglycerophosphoglycerol, n-C18:0) (periplasm)	Glycerophospholipid Metabolism	0	0	1000	0
LPLIPAL1G181pp	h2o[p] + 1agpg181[p] -> ocdcea[p] + h[p] + g3pg[p]	ECOLC_RS16795	Lysophospholipase L1 (2-acylglycerophosphoglycerol, n-C18:1) (periplasm)	Glycerophospholipid Metabolism	0	0	1000	0
LPLIPAL2A120	2ddecg3p[c] + h2o[c] -> 2 h[c] + glyc3p[c] + ddca[c]	ECOLC_RS22560	Lysophospholipase L2 (2-acylglycerophosphotidate, n-C12:0)	Glycerophospholipid Metabolism	0	0	1000	0
LPLIPAL2A140	2tdecg3p[c] + h2o[c] -> 2 h[c] + glyc3p[c] + ttdca[c]	ECOLC_RS22560	Lysophospholipase L2 (2-acylglycerophosphotidate, n-C14:0)	Glycerophospholipid Metabolism	0	0	1000	0
LPLIPAL2A141	2tdec7eg3p[c] + h2o[c] -> 2 h[c] + glyc3p[c] + ttdcea[c]	ECOLC_RS22560	Lysophospholipase L2 (2-acylglycerophosphotidate, n-C14:1)	Glycerophospholipid Metabolism	0	0	1000	0
LPLIPAL2A160	2hdecg3p[c] + h2o[c] -> 2 h[c] + glyc3p[c] + hdca[c]	ECOLC_RS22560	Lysophospholipase L2 (2-acylglycerophosphotidate, n-C16:0)	Glycerophospholipid Metabolism	0	0	1000	0
LPLIPAL2A161	h2o[c] + 2hdec9eg3p[c] -> 2 h[c] + hdcea[c] + glyc3p[c]	ECOLC_RS22560	Lysophospholipase L2 (2-acylglycerophosphotidate, n-C16:1)	Glycerophospholipid Metabolism	0	0	1000	0
LPLIPAL2A180	2odecg3p[c] + h2o[c] -> 2 h[c] + glyc3p[c] + ocdca[c]	ECOLC_RS22560	Lysophospholipase L2 (2-acylglycerophosphotidate, n-C18:0)	Glycerophospholipid Metabolism	0	0	1000	0
LPLIPAL2A181	2odec11eg3p[c] + h2o[c] -> 2 h[c] + glyc3p[c] + ocdcea[c]	ECOLC_RS22560	Lysophospholipase L2 (2-acylglycerophosphotidate, n-C18:1)	Glycerophospholipid Metabolism	0	0	1000	0
LPLIPAL2ATE120	2agpe120[c] + pg120[c] -> apg120[c] + g3pe[c]	ECOLC_RS22560	Lysophospholipase L2 (acyltransferase, 2-acyl-glycerophosphoethanolamine, n-C12:0)	Glycerophospholipid Metabolism	0	0	1000	0
LPLIPAL2ATE140	2agpe140[c] + pg140[c] -> apg140[c] + g3pe[c]	ECOLC_RS22560	Lysophospholipase L2 (acyltransferase, 2-acyl-glycerophosphoethanolamine, n-C14:0)	Glycerophospholipid Metabolism	0	0	1000	0
LPLIPAL2ATE141	pg141[c] + 2agpe141[c] -> apg141[c] + g3pe[c]	ECOLC_RS22560	Lysophospholipase L2 (acyltransferase, 2-acyl-glycerophosphoethanolamine, n-C14:1)	Glycerophospholipid Metabolism	0	0	1000	0
LPLIPAL2ATE160	2agpe160[c] + pg160[c] -> apg160[c] + g3pe[c]	ECOLC_RS22560	Lysophospholipase L2 (acyltransferase, 2-acyl-glycerophosphoethanolamine, n-C16:0)	Glycerophospholipid Metabolism	0	0	1000	0
LPLIPAL2ATE161	pg161[c] + 2agpe161[c] -> apg161[c] + g3pe[c]	ECOLC_RS22560	Lysophospholipase L2 (acyltransferase, 2-acyl-glycerophosphoethanolamine, n-C16:1)	Glycerophospholipid Metabolism	0	0	1000	0
LPLIPAL2ATE180	pg180[c] + 2agpe180[c] -> g3pe[c] + apg180[c]	ECOLC_RS22560	Lysophospholipase L2 (acyltransferase, 2-acyl-glycerophosphoethanolamine, n-C18:0)	Glycerophospholipid Metabolism	0	0	1000	0
LPLIPAL2ATE181	2agpe181[c] + pg181[c] -> apg181[c] + g3pe[c]	ECOLC_RS22560	Lysophospholipase L2 (acyltransferase, 2-acyl-glycerophosphoethanolamine, n-C18:1)	Glycerophospholipid Metabolism	0	0	1000	0
LPLIPAL2ATG120	2agpg120[c] + pg120[c] -> g3pg[c] + apg120[c]	ECOLC_RS22560	Lysophospholipase L2 (acyltransferase, 2-acyl-glycerophosphoglycerol, n-C12:0)	Glycerophospholipid Metabolism	0	0	1000	0
LPLIPAL2ATG140	2agpg140[c] + pg140[c] -> g3pg[c] + apg140[c]	ECOLC_RS22560	Lysophospholipase L2 (acyltransferase, 2-acyl-glycerophosphoglycerol, n-C14:0)	Glycerophospholipid Metabolism	0	0	1000	0
LPLIPAL2ATG141	2agpg141[c] + pg141[c] -> apg141[c] + g3pg[c]	ECOLC_RS22560	Lysophospholipase L2 (acyltransferase, 2-acyl-glycerophosphoglycerol, n-C14:1)	Glycerophospholipid Metabolism	0	0	1000	0
LPLIPAL2ATG160	2agpg160[c] + pg160[c] -> g3pg[c] + apg160[c]	ECOLC_RS22560	Lysophospholipase L2 (acyltransferase, 2-acyl-glycerophosphoglycerol, n-C16:0)	Glycerophospholipid Metabolism	0	0	1000	0
LPLIPAL2ATG161	pg161[c] + 2agpg161[c] -> g3pg[c] + apg161[c]	ECOLC_RS22560	Lysophospholipase L2 (acyltransferase, 2-acyl-glycerophosphoglycerol, n-C16:1)	Glycerophospholipid Metabolism	0	0	1000	0
LPLIPAL2ATG180	2agpg180[c] + pg180[c] -> g3pg[c] + apg180[c]	ECOLC_RS22560	Lysophospholipase L2 (acyltransferase, 2-acyl-glycerophosphoglycerol, n-C18:0)	Glycerophospholipid Metabolism	0	0	1000	0
LPLIPAL2ATG181	2agpg181[c] + pg181[c] -> g3pg[c] + apg181[c]	ECOLC_RS22560	Lysophospholipase L2 (acyltransferase, 2-acyl-glycerophosphoglycerol, n-C18:1)	Glycerophospholipid Metabolism	0	0	1000	0
LPLIPAL2E120	2agpe120[c] + h2o[c] -> h[c] + g3pe[c] + ddca[c]	ECOLC_RS22560	Lysophospholipase L2 (2-acylglycerophosphoethanolamine, n-C12:0)	Glycerophospholipid Metabolism	0	0	1000	0
LPLIPAL2E140	2agpe140[c] + h2o[c] -> h[c] + ttdca[c] + g3pe[c]	ECOLC_RS22560	Lysophospholipase L2 (2-acylglycerophosphoethanolamine, n-C14:0)	Glycerophospholipid Metabolism	0	0	1000	0
LPLIPAL2E141	h2o[c] + 2agpe141[c] -> h[c] + g3pe[c] + ttdcea[c]	ECOLC_RS22560	Lysophospholipase L2 (2-acylglycerophosphoethanolamine, n-C14:1)	Glycerophospholipid Metabolism	0	0	1000	0
LPLIPAL2E160	2agpe160[c] + h2o[c] -> h[c] + g3pe[c] + hdca[c]	ECOLC_RS22560	Lysophospholipase L2 (2-acylglycerophosphoethanolamine, n-C16:0)	Glycerophospholipid Metabolism	0	0	1000	0
LPLIPAL2E161	h2o[c] + 2agpe161[c] -> h[c] + hdcea[c] + g3pe[c]	ECOLC_RS22560	Lysophospholipase L2 (2-acylglycerophosphoethanolamine, n-C16:1)	Glycerophospholipid Metabolism	0	0	1000	0
LPLIPAL2E180	h2o[c] + 2agpe180[c] -> h[c] + ocdca[c] + g3pe[c]	ECOLC_RS22560	Lysophospholipase L2 (2-acylglycerophosphoethanolamine, n-C18:0)	Glycerophospholipid Metabolism	0	0	1000	0
LPLIPAL2E181	h2o[c] + 2agpe181[c] -> h[c] + ocdcea[c] + g3pe[c]	ECOLC_RS22560	Lysophospholipase L2 (2-acylglycerophosphoethanolamine, n-C18:1)	Glycerophospholipid Metabolism	0	0	1000	0
LPLIPAL2G120	2agpg120[c] + h2o[c] -> h[c] + g3pg[c] + ddca[c]	ECOLC_RS22560	Lysophospholipase L2 (2-acylglycerophosphoglycerol, n-C12:0)	Glycerophospholipid Metabolism	0	0	1000	0
LPLIPAL2G140	2agpg140[c] + h2o[c] -> h[c] + g3pg[c] + ttdca[c]	ECOLC_RS22560	Lysophospholipase L2 (2-acylglycerophosphoglycerol, n-C14:0)	Glycerophospholipid Metabolism	0	0	1000	0
LPLIPAL2G141	h2o[c] + 2agpg141[c] -> h[c] + g3pg[c] + ttdcea[c]	ECOLC_RS22560	Lysophospholipase L2 (2-acylglycerophosphoglycerol, n-C14:1)	Glycerophospholipid Metabolism	0	0	1000	0
LPLIPAL2G160	2agpg160[c] + h2o[c] -> h[c] + g3pg[c] + hdca[c]	ECOLC_RS22560	Lysophospholipase L2 (2-acylglycerophosphoglycerol, n-C16:0)	Glycerophospholipid Metabolism	0	0	1000	0
LPLIPAL2G161	h2o[c] + 2agpg161[c] -> h[c] + hdcea[c] + g3pg[c]	ECOLC_RS22560	Lysophospholipase L2 (2-acylglycerophosphoglycerol, n-C16:1)	Glycerophospholipid Metabolism	0	0	1000	0
LPLIPAL2G180	2agpg180[c] + h2o[c] -> h[c] + g3pg[c] + ocdca[c]	ECOLC_RS22560	Lysophospholipase L2 (2-acylglycerophosphoglycerol, n-C18:0)	Glycerophospholipid Metabolism	0	0	1000	0
LPLIPAL2G181	2agpg181[c] + h2o[c] -> h[c] + g3pg[c] + ocdcea[c]	ECOLC_RS22560	Lysophospholipase L2 (2-acylglycerophosphoglycerol, n-C18:1)	Glycerophospholipid Metabolism	0	0	1000	0
LSERDHr	ser__L[c] + nadp[c] <=> h[c] + 2amsa[c] + nadph[c]	ECOLC_RS11360	L-serine dehydrogenase	Glycine and Serine Metabolism	1	-1000	1000	0
[truncated: 972 more rows]

## Sheet: iTA818
Abbreviation	Reaction	GPR	Description	SubSystem	Reversible	Lower bound	Upper bound	Objetive	Confidence Score	EC Number	KEGG ID	Notes
[truncated: 1,934 more rows]

## Sheet: iTA821
Abbreviation	Reaction	GPR	Description	SubSystem	Reversible	Lower bound	Upper bound	Objetive	Confidence Score	EC Number	KEGG ID	Notes
[truncated: 1,579 more rows]
